# Supplementary material for: Canonical cytosolic iron-sulfur cluster assembly and non-canonical functions of DRE2 in Arabidopsis
Source: PLoS Genet. 2019 Apr 29;15(4):e1008094. doi: 10.1371/journal.pgen.1008094 (PMC6508740; doi:10.1371/journal.pgen.1008094)
Supplement: S1 Dataset — (XLSX) [file pgen.1008094.s011.xlsx]

## Sheet: dre2-4
List of DMRs in dre2-4 identified by whole genome bisulfite sequencing.
Region	type	DmC-hyper	DmC-hypo	total-C	all-methy1	all-methy2	foldchange	overlap-gene	Strand	Gene_type	GeneAnnot	overlap-TE	TEFamily	Intergenic
Chr1:10007650-10007999	hyper	10	0	132	0.0568	0.1485	2.6123	NONE	NONE	NONE	NONE	AT1TE32270	LINE/L1	NONE
Chr1:10078550-10078949	hyper	21	1	202	0.0094	0.0604	6.4368	AT1G28680	+	protein_coding_gene	Symbols: | HXXXD-type acyl-transferase family protein | chr1:10078222-10079763 FORWARD LENGTH=451	NONE	NONE	NONE
Chr1:10104150-10104349	hyper	7	2	98	0.0591	0.1305	2.2101	AT1G28760	+	protein_coding_gene	Symbols: | Uncharacterized conserved protein (DUF2215) | chr1:10103158-10104588 FORWARD LENGTH=476	NONE	NONE	NONE
Chr1:10316150-10316399	hyper	8	0	97	0.0379	0.1016	2.6847	NONE	NONE	NONE	NONE	AT1TE33350	LTR/Copia	NONE
Chr1:10472450-10473249	hyper	31	0	414	0.0282	0.0799	2.8371	AT1G29910	-	protein_coding_gene	Symbols: CAB3, AB180, LHCB1.2 | chlorophyll A/B binding protein 3 | chr1:10472443-10473246 REVERSE LENGTH=267	NONE	NONE	NONE
Chr1:10931800-10932249	hyper	24	0	150	0.0363	0.1787	4.9272	NONE	NONE	NONE	NONE	AT1TE35310|AT1TE35315|AT1TE35320|AT1TE35325	DNA/MuDR;RC/Helitron;DNA;DNA	NONE
Chr1:10964500-10964749	hyper	10	0	89	0.083	0.1865	2.2473	NONE	NONE	NONE	NONE	NONE	NONE	AT1G30825-AT1G30840
Chr1:11032450-11032649	hyper	7	0	62	0.0705	0.2378	3.3752	NONE	NONE	NONE	NONE	NONE	NONE	AT1G30930-AT1G30950
Chr1:11127750-11128049	hyper	10	0	86	0.0644	0.1862	2.8899	NONE	NONE	NONE	NONE	NONE	NONE	AT1G31160-AT1G31163
Chr1:11147200-11147449	hyper	7	0	102	0.0059	0.0596	10.1113	AT1G31200	-	protein_coding_gene	Symbols: ATPP2-A9, PP2-A9 | phloem protein 2-A9 | chr1:11146923-11147678 REVERSE LENGTH=180	NONE	NONE	NONE
Chr1:11175650-11175999	hyper	9	0	134	0.0055	0.0626	11.2978	AT1G31260	-	protein_coding_gene	Symbols: ZIP10 | zinc transporter 10 precursor | chr1:11175559-11177362 REVERSE LENGTH=364	NONE	NONE	NONE
Chr1:11512650-11512899	hyper	7	0	99	0.025	0.088	3.5218	AT1G32020	-	protein_coding_gene	Symbols: | F-box family protein | chr1:11512552-11513067 REVERSE LENGTH=171	NONE	NONE	NONE
Chr1:11564550-11564949	hyper	24	0	146	0.0015	0.13	86.5543	AT1G32140	-	protein_coding_gene	Symbols: | F-box family protein | chr1:11562742-11564833 REVERSE LENGTH=591	NONE	NONE	NONE
Chr1:11652850-11653149	hyper	7	0	122	0.0066	0.0397	6.0237	AT1G32300	+	protein_coding_gene	Symbols: | D-arabinono-1,4-lactone oxidase family protein | chr1:11651342-11653365 FORWARD LENGTH=595	NONE	NONE	NONE
Chr1:11734950-11735149	hyper	7	0	37	0.0302	0.2117	7.0225	NONE	NONE	NONE	NONE	AT1TE38030	RC/Helitron	NONE
Chr1:1184600-1184999	hyper	36	1	140	0.1617	0.3974	2.4574	NONE	NONE	NONE	NONE	AT1TE03860	DNA/Pogo	NONE
Chr1:11926450-11926749	hyper	8	1	147	0.0069	0.0413	5.9604	AT1G32910	+	protein_coding_gene	Symbols: | HXXXD-type acyl-transferase family protein | chr1:11925426-11926908 FORWARD LENGTH=464	NONE	NONE	NONE
Chr1:12057450-12057749	hyper	7	0	117	0.0071	0.0571	8.0352	AT1G33250	-	protein_coding_gene	Symbols: | Protein of unknown function (DUF604) | chr1:12057524-12059346 REVERSE LENGTH=548	NONE	NONE	NONE
Chr1:12058250-12058549	hyper	10	0	139	0.0535	0.1059	1.9799	AT1G33250	-	protein_coding_gene	Symbols: | Protein of unknown function (DUF604) | chr1:12057524-12059346 REVERSE LENGTH=548	NONE	NONE	NONE
Chr1:12088150-12088549	hyper	18	0	181	0.0151	0.0764	5.0767	AT1G33340	+	protein_coding_gene	Symbols: | ENTH/ANTH/VHS superfamily protein | chr1:12087628-12088752 FORWARD LENGTH=374	NONE	NONE	NONE
Chr1:12517350-12517699	hyper	14	0	97	0.0805	0.3723	4.6233	NONE	NONE	NONE	NONE	AT1TE40735	RC/Helitron	NONE
Chr1:12845450-12845749	hyper	8	0	87	0.0274	0.0929	3.3871	NONE	NONE	NONE	NONE	AT1TE41800|AT1TE41805	LTR/Copia;RC/Helitron	NONE
Chr1:12922050-12922349	hyper	9	0	103	0.0485	0.1388	2.8606	NONE	NONE	NONE	NONE	NONE	NONE	AT1G35230-AT1G35240
Chr1:12922850-12923249	hyper	22	0	130	0.0791	0.214	2.7053	NONE	NONE	NONE	NONE	NONE	NONE	AT1G35230-AT1G35240
Chr1:12923900-12924349	hyper	16	1	153	0.0533	0.1221	2.29	NONE	NONE	NONE	NONE	NONE	NONE	AT1G35230-AT1G35240
Chr1:13096600-13096899	hyper	10	0	131	0.0154	0.0729	4.7432	AT1G35530	+	protein_coding_gene	Symbols: | DEAD/DEAH box RNA helicase family protein | chr1:13089994-13097078 FORWARD LENGTH=1324	NONE	NONE	NONE
Chr1:13124450-13124799	hyper	12	0	157	0.0229	0.0955	4.169	AT1G35580	-	protein_coding_gene	Symbols: CINV1 | cytosolic invertase 1 | chr1:13122460-13124808 REVERSE LENGTH=551	NONE	NONE	NONE
Chr1:13353500-13354049	hyper	23	0	192	0.0325	0.21	6.4533	NONE	NONE	NONE	NONE	AT1TE43670	RC/Helitron	NONE
Chr1:13604400-13604749	hyper	14	0	117	0.0801	0.2273	2.8387	NONE	NONE	NONE	NONE	NONE	NONE	AT1G36180-AT1G36230
Chr1:14000350-14000699	hyper	16	0	116	0.04	0.217	5.4193	NONE	NONE	NONE	NONE	NONE	NONE	AT1G36925-AT1G36940
Chr1:15908400-15908649	hyper	9	0	78	0.0047	0.1513	32.4601	NONE	NONE	NONE	NONE	NONE	NONE	AT1G42440-AT1G42470
Chr1:1592200-1592699	hyper	29	0	182	0.0437	0.2268	5.1912	NONE	NONE	NONE	NONE	AT1TE05225	RC/Helitron	NONE
Chr1:1602700-1602899	hyper	7	0	89	0.0365	0.0911	2.495	AT1G05460	-	protein_coding_gene	Symbols: SDE3 | P-loop containing nucleoside triphosphate hydrolases superfamily protein | chr1:1601357-1604658 REVERSE LENGTH=1002	NONE	NONE	NONE
Chr1:1610000-1610249	hyper	12	0	123	0.0529	0.1071	2.0238	AT1G05470	-	protein_coding_gene	Symbols: CVP2 | DNAse I-like superfamily protein | chr1:1608558-1611291 REVERSE LENGTH=617	NONE	NONE	NONE
Chr1:16117150-16117499	hyper	17	0	106	0.0822	0.2583	3.1445	NONE	NONE	NONE	NONE	AT1TE53085	DNA/MuDR	NONE
Chr1:16410750-16410949	hyper	7	0	80	0.0641	0.1452	2.2648	AT1G43580	-	protein_coding_gene	Symbols: | Sphingomyelin synthetase family protein | chr1:16410673-16412612 REVERSE LENGTH=421	NONE	NONE	NONE
Chr1:16413400-16413799	hyper	16	0	130	0.0977	0.2733	2.7985	NONE	NONE	NONE	NONE	NONE	NONE	AT1G43580-AT1G43600
Chr1:16437300-16437599	hyper	8	0	129	0.0095	0.0652	6.8333	AT1G43630	-	protein_coding_gene	Symbols: | Protein of unknown function (DUF793) | chr1:16436445-16437686 REVERSE LENGTH=413	NONE	NONE	NONE
Chr1:16563850-16564149	hyper	7	0	120	0.0041	0.0577	13.9535	AT1G43780	+	protein_coding_gene	Symbols: scpl44 | serine carboxypeptidase-like 44 | chr1:16563811-16567399 FORWARD LENGTH=479	AT1TE54610	DNA/MuDR	NONE
Chr1:16651400-16651749	hyper	12	0	95	0.0513	0.1547	3.0168	NONE	NONE	NONE	NONE	AT1TE54885	DNA/MuDR	NONE
Chr1:16659500-16659699	hyper	9	0	49	0.0523	0.2292	4.3847	NONE	NONE	NONE	NONE	AT1TE54920|AT1TE54925	DNA/MuDR;DNA/MuDR	NONE
Chr1:16801700-16802099	hyper	14	0	126	0.026	0.1364	5.2443	NONE	NONE	NONE	NONE	AT1TE55560	RC/Helitron	NONE
Chr1:16831050-16831349	hyper	7	0	122	0.0045	0.0415	9.1399	AT1G44318	+	protein_coding_gene	Symbols: hemb2 | Aldolase superfamily protein | chr1:16831016-16833916 FORWARD LENGTH=406	NONE	NONE	NONE
Chr1:16881900-16882199	hyper	11	0	94	0.1039	0.2345	2.2559	AT1G44674	+	protein_coding_gene	Symbols: | Protein of unknown function (DUF1664) | chr1:16881891-16882133 FORWARD LENGTH=51	AT1TE55910	LINE/L1	NONE
Chr1:16924650-16925099	hyper	27	0	153	0.0689	0.2134	3.0973	AT1G44810	+	protein_coding_gene	Symbols: | DNA-binding storekeeper protein-related transcriptional regulator | chr1:16923621-16924511 FORWARD LENGTH=296	NONE	NONE	NONE
Chr1:16925300-16925549	hyper	9	0	94	0.133	0.2828	2.1265	NONE	NONE	NONE	NONE	NONE	NONE	AT1G44810-AT1G44820
Chr1:17100950-17101449	hyper	19	0	190	0.0346	0.105	3.03	AT1G45180	+	protein_coding_gene	Symbols: | RING/U-box superfamily protein | chr1:17099335-17101683 FORWARD LENGTH=645	NONE	NONE	NONE
Chr1:1728050-1728299	hyper	10	0	102	0.0086	0.0572	6.663	AT1G05780	+	protein_coding_gene	Symbols: | Vacuolar ATPase assembly integral membrane protein VMA21-like domain | chr1:1726761-1728180 FORWARD LENGTH=106	NONE	NONE	NONE
Chr1:17327650-17327949	hyper	7	0	115	0.0026	0.0909	35.2512	AT1G47270	+	protein_coding_gene	Symbols: AtTLP6, TLP6 | tubby like protein 6 | chr1:17326828-17328564 FORWARD LENGTH=413	NONE	NONE	NONE
Chr1:17359550-17359849	hyper	9	0	126	0.0074	0.0531	7.1531	AT1G47350	-	protein_coding_gene	Symbols: | F-box associated ubiquitination effector family protein | chr1:17358447-17360722 REVERSE LENGTH=528	NONE	NONE	NONE
Chr1:17485000-17485199	hyper	7	0	78	0.0079	0.1155	14.5869	AT1G47578	+	protein_coding_gene	Symbols: | Biotin/lipoate A/B protein ligase family | chr1:17484365-17485470 FORWARD LENGTH=280	NONE	NONE	NONE
Chr1:17486800-17486999	hyper	7	0	90	0.0517	0.1175	2.2739	NONE	NONE	NONE	NONE	NONE	NONE	AT1G47580-AT1G47600
Chr1:17489250-17489549	hyper	10	0	125	0.0835	0.178	2.1301	NONE	NONE	NONE	NONE	NONE	NONE	AT1G47580-AT1G47600
Chr1:17559350-17559949	hyper	21	0	249	0.0645	0.1428	2.2135	AT1G47710	+	protein_coding_gene	Symbols: | Serine protease inhibitor (SERPIN) family protein | chr1:17558271-17560061 FORWARD LENGTH=391	NONE	NONE	NONE
Chr1:17714800-17714999	hyper	9	0	41	0.1123	0.2668	2.376	NONE	NONE	NONE	NONE	NONE	NONE	AT1G48010-AT1G48020
Chr1:17726300-17726599	hyper	7	0	119	0.0345	0.0823	2.3817	AT1G48050	+	protein_coding_gene	Symbols: KU80, ATKU80 | Ku80 family protein | chr1:17723498-17726859 FORWARD LENGTH=680	NONE	NONE	NONE
Chr1:17979600-17979949	hyper	15	0	129	0.0673	0.1682	2.5009	NONE	NONE	NONE	NONE	NONE	NONE	AT1G48620-AT1G48630
Chr1:17997650-17997949	hyper	9	0	118	0.012	0.0657	5.4821	AT1G48660	-	protein_coding_gene	Symbols: | Auxin-responsive GH3 family protein | chr1:17995948-17997972 REVERSE LENGTH=573	NONE	NONE	NONE
Chr1:18133600-18133899	hyper	7	0	132	0.0219	0.0681	3.1069	AT1G49010	+	protein_coding_gene	Symbols: | Duplicated homeodomain-like superfamily protein | chr1:18132714-18133778 FORWARD LENGTH=314	NONE	NONE	NONE
Chr1:18214050-18214299	hyper	7	0	70	0.147	0.2708	1.8426	NONE	NONE	NONE	NONE	AT1TE60340|AT1TE60345	DNA/MuDR;DNA/MuDR	NONE
Chr1:18232750-18232999	hyper	7	0	80	0.0251	0.0756	3.0132	AT1G49290	-	protein_coding_gene	Symbols: | unknown protein; BEST Arabidopsis thaliana protein match is: unknown protein (TAIR:AT5G13620.1); Has 99 Blast hits to 93 proteins in 11 species: Archae - 0; Bacteria - 0; Metazoa - 2; Fungi - 0; Plants - 97; Viruses - 0; Other Eukaryotes - 0 (source: NCBI BLink). | chr1:18232608-18233624 REVERSE LENGTH=338	NONE	NONE	NONE
Chr1:18332400-18332749	hyper	11	1	137	0.0452	0.0973	2.1537	AT1G49530	+	protein_coding_gene	Symbols: GGPS6 | geranylgeranyl pyrophosphate synthase 6 | chr1:18332529-18333539 FORWARD LENGTH=336	NONE	NONE	NONE
Chr1:18457450-18457799	hyper	19	0	109	0.0494	0.2062	4.177	NONE	NONE	NONE	NONE	NONE	NONE	AT1G49850-AT1G49860
Chr1:18510900-18511249	hyper	10	0	142	0.0597	0.1476	2.471	AT1G49980	+	protein_coding_gene	Symbols: | DNA/RNA polymerases superfamily protein | chr1:18508026-18512111 FORWARD LENGTH=671	NONE	NONE	NONE
Chr1:18581300-18581699	hyper	18	0	138	0.0667	0.1604	2.404	AT1G50160	+	protein_coding_gene	Symbols: | BEST Arabidopsis thaliana protein match is: Polynucleotidyl transferase, ribonuclease H-like superfamily protein (TAIR:AT2G04420.1); Has 34 Blast hits to 34 proteins in 2 species: Archae - 0; Bacteria - 0; Metazoa - 0; Fungi - 0; Plants - 34; Viruses - 0; Other Eukaryotes - 0 (source: NCBI BLink). | chr1:18581429-18581650 FORWARD LENGTH=73	NONE	NONE	NONE
Chr1:18642100-18642449	hyper	16	0	118	0.0685	0.2312	3.3752	NONE	NONE	NONE	NONE	NONE	NONE	AT1G50325-AT1G50340
Chr1:18644700-18644999	hyper	11	0	146	0.0803	0.164	2.041	NONE	NONE	NONE	NONE	NONE	NONE	AT1G50325-AT1G50340
Chr1:18789350-18789649	hyper	7	0	125	0.0026	0.0304	11.6756	AT1G50720	-	protein_coding_gene	Symbols: | Stigma-specific Stig1 family protein | chr1:18789180-18789644 REVERSE LENGTH=154	NONE	NONE	NONE
Chr1:18866750-18867099	hyper	11	0	149	0.0127	0.0652	5.1324	AT1G50900|AT1G50910	+|-	protein_coding_gene|protein_coding_gene	Symbols: GDC1 | Ankyrin repeat family protein | chr1:18866272-18867014 FORWARD LENGTH=175;Symbols: | unknown protein; Has 1105 Blast hits to 802 proteins in 217 species: Archae - 2; Bacteria - 177; Metazoa - 445; Fungi - 210; Plants - 58; Viruses - 6; Other Eukaryotes - 207 (source: NCBI BLink). | chr1:18867083-18869839 REVERSE LENGTH=500	NONE	NONE	NONE
Chr1:18878050-18878249	hyper	8	0	84	0.0105	0.1196	11.39	AT1G50940	-	protein_coding_gene	Symbols: ETFALPHA | electron transfer flavoprotein alpha | chr1:18878038-18879939 REVERSE LENGTH=363	NONE	NONE	NONE
Chr1:19049750-19050099	hyper	8	0	129	0.0104	0.0552	5.3305	AT1G51380	+	protein_coding_gene	Symbols: | DEA(D/H)-box RNA helicase family protein | chr1:19047960-19049967 FORWARD LENGTH=392	NONE	NONE	NONE
Chr1:19171700-19171899	hyper	7	0	75	0.0826	0.216	2.616	NONE	NONE	NONE	NONE	NONE	NONE	AT1G51690-AT1G51700
Chr1:19368250-19368449	hyper	8	0	70	0.0541	0.1996	3.6929	NONE	NONE	NONE	NONE	NONE	NONE	AT1G52070-AT1G52080
Chr1:19569150-19569399	hyper	8	0	109	0.0356	0.0947	2.6568	AT1G52530	+	protein_coding_gene	Symbols: | CONTAINS InterPro DOMAIN/s: Hus1-like protein (InterPro:IPR007150); Has 129 Blast hits to 128 proteins in 49 species: Archae - 0; Bacteria - 0; Metazoa - 57; Fungi - 10; Plants - 47; Viruses - 0; Other Eukaryotes - 15 (source: NCBI BLink). | chr1:19569045-19570004 FORWARD LENGTH=319	NONE	NONE	NONE
Chr1:19670050-19670249	hyper	8	0	90	0.0658	0.1511	2.2944	AT1G52820	+	protein_coding_gene	Symbols: | 2-oxoglutarate (2OG) and Fe(II)-dependent oxygenase superfamily protein | chr1:19669216-19670321 FORWARD LENGTH=317	NONE	NONE	NONE
Chr1:19743850-19744099	hyper	8	1	87	0.0829	0.1992	2.4027	NONE	NONE	NONE	NONE	AT1TE65255	DNA/HAT	NONE
Chr1:19767800-19767999	hyper	7	2	54	0.106	0.2328	2.197	NONE	NONE	NONE	NONE	AT1TE65355|AT1TE65360	RC/Helitron;RC/Helitron	NONE
Chr1:19799000-19799199	hyper	8	0	77	0.0133	0.0513	3.8668	NONE	NONE	NONE	NONE	NONE	NONE	AT1G53130-AT1G53140
Chr1:19863200-19863399	hyper	7	0	97	0.0544	0.1272	2.337	AT1G53270	+	protein_coding_gene	Symbols: | ABC-2 type transporter family protein | chr1:19862878-19864650 FORWARD LENGTH=590	NONE	NONE	NONE
Chr1:19913850-19914149	hyper	8	0	130	0.0176	0.0534	3.0369	AT1G53380	-	protein_coding_gene	Symbols: | Plant protein of unknown function (DUF641) | chr1:19913341-19914702 REVERSE LENGTH=453	NONE	NONE	NONE
Chr1:19968500-19968699	hyper	10	0	91	0.019	0.0973	5.1262	AT1G53500	-	protein_coding_gene	Symbols: MUM4, RHM2, ATRHM2, ATMUM4 | NAD-dependent epimerase/dehydratase family protein | chr1:19967157-19969239 REVERSE LENGTH=667	NONE	NONE	NONE
Chr1:20053350-20053549	hyper	7	0	87	0.0375	0.1015	2.7107	AT1G53710	-	protein_coding_gene	Symbols: | Calcineurin-like metallo-phosphoesterase superfamily protein | chr1:20053339-20056271 REVERSE LENGTH=528	NONE	NONE	NONE
Chr1:20330950-20331199	hyper	7	0	70	0.0295	0.1883	6.3883	NONE	NONE	NONE	NONE	NONE	NONE	AT1G54440-AT1G54445
Chr1:20334700-20335149	hyper	23	0	170	0.0348	0.1725	4.9634	NONE	NONE	NONE	NONE	AT1TE67200	LTR/Gypsy	NONE
Chr1:20376400-20376649	hyper	10	0	107	0.0246	0.0747	3.0413	AT1G54560	-	protein_coding_gene	Symbols: XIE, ATXIE | Myosin family protein with Dil domain | chr1:20371649-20379745 REVERSE LENGTH=1529	NONE	NONE	NONE
Chr1:20423800-20424099	hyper	9	0	106	0.1271	0.2506	1.972	NONE	NONE	NONE	NONE	NONE	NONE	AT1G54720-AT1G54730
Chr1:20434150-20434399	hyper	9	0	112	0.0492	0.147	2.9858	AT1G54760	+	protein_coding_gene	Symbols: AGL85 | AGAMOUS-like 85 | chr1:20433912-20434397 FORWARD LENGTH=161	NONE	NONE	NONE
Chr1:20742250-20742499	hyper	8	0	99	0.0068	0.0478	7.0632	AT1G55540	-	protein_coding_gene	Symbols: emb1011 | Nuclear pore complex protein | chr1:20734759-20743049 REVERSE LENGTH=1816	NONE	NONE	NONE
Chr1:20781350-20781699	hyper	8	0	168	0.0021	0.0287	13.7964	AT1G55610	-	protein_coding_gene	Symbols: BRL1 | BRI1 like | chr1:20779874-20783374 REVERSE LENGTH=1166	NONE	NONE	NONE
Chr1:21087800-21088149	hyper	9	0	118	0.0168	0.0707	4.2104	AT1G56330	-	protein_coding_gene	Symbols: SAR1, ATSAR1, ATSARA1B, ATSAR1B, SAR1B | secretion-associated RAS 1B | chr1:21086845-21088478 REVERSE LENGTH=193	NONE	NONE	NONE
Chr1:21130250-21130599	hyper	7	0	118	0.004	0.0535	13.5387	AT1G56423	+	protein_coding_gene	Symbols: | unknown protein; FUNCTIONS IN: molecular_function unknown; INVOLVED IN: biological_process unknown; LOCATED IN: endomembrane system; Has 30201 Blast hits to 17322 proteins in 780 species: Archae - 12; Bacteria - 1396; Metazoa - 17338; Fungi - 3422; Plants - 5037; Viruses - 0; Other Eukaryotes - 2996 (source: NCBI BLink). | chr1:21129075-21130558 FORWARD LENGTH=270	NONE	NONE	NONE
Chr1:21197600-21197899	hyper	8	0	111	0.0359	0.1117	3.1103	AT1G56570	+	protein_coding_gene	Symbols: | Tetratricopeptide repeat (TPR)-like superfamily protein | chr1:21195804-21197721 FORWARD LENGTH=611	NONE	NONE	NONE
Chr1:21429450-21429649	hyper	8	0	88	0.0273	0.1053	3.8612	NONE	NONE	NONE	NONE	NONE	NONE	AT1G57850-AT1G57860
Chr1:21512600-21512999	hyper	16	0	182	0.0161	0.0817	5.077	AT1G58100	-	protein_coding_gene	Symbols: | TCP family transcription factor | chr1:21512680-21513885 REVERSE LENGTH=401	NONE	NONE	NONE
Chr1:21531000-21531349	hyper	9	0	146	0.0048	0.0476	9.8984	NONE	NONE	NONE	NONE	NONE	NONE	AT1G58150-AT1G58160
Chr1:2158000-2158299	hyper	10	0	135	0.0845	0.1672	1.9793	AT1G07025	-	protein_coding_gene	Symbols: | Mitochondrial substrate carrier family protein | chr1:2157658-2158158 REVERSE LENGTH=166	NONE	NONE	NONE
Chr1:21585250-21585649	hyper	19	0	153	0.0208	0.125	5.9958	NONE	NONE	NONE	NONE	NONE	NONE	AT1G58245-AT1G58248
Chr1:21607000-21607249	hyper	7	0	85	0.0307	0.0831	2.7071	AT1G58260	+	protein_coding_gene	Symbols: CYP79C2, CYP79C3P | cytochrome p450 79c2 | chr1:21605752-21607995 FORWARD LENGTH=530	NONE	NONE	NONE
Chr1:21682500-21682799	hyper	18	0	106	0.06	0.2464	4.1093	NONE	NONE	NONE	NONE	NONE	NONE	AT1G58360-AT1G58370
Chr1:21824150-21824449	hyper	14	0	96	0.0457	0.1243	2.7186	NONE	NONE	NONE	NONE	AT1TE72030	DNA/HAT	NONE
Chr1:21932900-21933249	hyper	10	0	143	0.0017	0.0594	35.2839	AT1G59680	+	protein_coding_gene	Symbols: EDA1 | F-box associated ubiquitination effector family protein | chr1:21933021-21934216 FORWARD LENGTH=264	AT1TE72375	RC/Helitron	NONE
Chr1:22642150-22642499	hyper	12	0	150	0.0365	0.0866	2.3726	AT1G61370	-	protein_coding_gene	Symbols: | S-locus lectin protein kinase family protein | chr1:22642096-22645147 REVERSE LENGTH=814	NONE	NONE	NONE
Chr1:22642650-22642899	hyper	8	0	105	0.0515	0.1313	2.5514	AT1G61370	-	protein_coding_gene	Symbols: | S-locus lectin protein kinase family protein | chr1:22642096-22645147 REVERSE LENGTH=814	NONE	NONE	NONE
Chr1:22744950-22745199	hyper	8	0	90	0.0165	0.0911	5.507	AT1G61630	+	protein_coding_gene	Symbols: ATENT7, ENT7 | equilibrative nucleoside transporter 7 | chr1:22744207-22746111 FORWARD LENGTH=417	NONE	NONE	NONE
Chr1:22748350-22748699	hyper	11	0	154	0.0562	0.1174	2.0885	AT1G61640	-	protein_coding_gene	Symbols: | Protein kinase superfamily protein | chr1:22746629-22749053 REVERSE LENGTH=621	NONE	NONE	NONE
Chr1:22778150-22778349	hyper	7	0	52	0.1342	0.2763	2.0591	NONE	NONE	NONE	NONE	AT1TE75085|AT1TE75090	DNA/MuDR;DNA/HAT	NONE
Chr1:22807750-22807999	hyper	7	0	112	0.0227	0.0751	3.3051	AT1G61760	-	protein_coding_gene	Symbols: | Late embryogenesis abundant (LEA) hydroxyproline-rich glycoprotein family | chr1:22807440-22808114 REVERSE LENGTH=224	NONE	NONE	NONE
Chr1:2288400-2288699	hyper	8	0	108	0.0075	0.0567	7.5719	AT1G07450	-	protein_coding_gene	Symbols: | NAD(P)-binding Rossmann-fold superfamily protein | chr1:2288038-2289256 REVERSE LENGTH=260	NONE	NONE	NONE
Chr1:22925300-22925699	hyper	16	0	171	0.0091	0.0679	7.4807	AT1G62030	-	protein_coding_gene	Symbols: | Cysteine/Histidine-rich C1 domain family protein | chr1:22924309-22926540 REVERSE LENGTH=743	NONE	NONE	NONE
Chr1:22929950-22930349	hyper	16	0	137	0.0293	0.1638	5.5883	NONE	NONE	NONE	NONE	NONE	NONE	AT1G62030-AT1G62040
Chr1:22984850-22985249	hyper	27	0	116	0.0193	0.2599	13.4651	NONE	NONE	NONE	NONE	NONE	NONE	AT1G62200-AT1G62210
Chr1:23004650-23004999	hyper	14	0	139	0.0227	0.0799	3.5162	AT1G62270	+	protein_coding_gene	Symbols: | F-box and associated interaction domains-containing protein | chr1:23004499-23005650 FORWARD LENGTH=383	NONE	NONE	NONE
Chr1:23042500-23042749	hyper	8	0	84	0.0257	0.0759	2.9557	AT1G62320	-	protein_coding_gene	Symbols: | ERD (early-responsive to dehydration stress) family protein | chr1:23041668-23044855 REVERSE LENGTH=769	NONE	NONE	NONE
Chr1:23049700-23050049	hyper	7	2	151	0.0248	0.06	2.4235	AT1G62330	+	protein_coding_gene	Symbols: | O-fucosyltransferase family protein | chr1:23046965-23050053 FORWARD LENGTH=652	NONE	NONE	NONE
Chr1:23181700-23182049	hyper	9	0	163	0.005	0.0362	7.2216	AT1G62610	-	protein_coding_gene	Symbols: | NAD(P)-binding Rossmann-fold superfamily protein | chr1:23181531-23182690 REVERSE LENGTH=277	NONE	NONE	NONE
Chr1:23237750-23237949	hyper	8	0	86	0.0834	0.189	2.2658	AT1G62760	-	protein_coding_gene	Symbols: | Plant invertase/pectin methylesterase inhibitor superfamily protein | chr1:23237574-23238512 REVERSE LENGTH=312	NONE	NONE	NONE
Chr1:23355200-23355499	hyper	9	0	116	0.0188	0.0594	3.1585	AT1G63020	-	protein_coding_gene	Symbols: NRPD1A, POL IVA, SDE4, NRPD1, SMD2 | nuclear RNA polymerase D1A | chr1:23355329-23361126 REVERSE LENGTH=1453	NONE	NONE	NONE
Chr1:23368550-23368899	hyper	9	0	129	0.0018	0.0481	27.4083	NONE	NONE	NONE	NONE	AT1TE76985	DNA	NONE
Chr1:23400950-23401299	hyper	7	0	158	0.0024	0.0403	16.8656	AT1G63100	-	protein_coding_gene	Symbols: | GRAS family transcription factor | chr1:23399391-23401367 REVERSE LENGTH=658	NONE	NONE	NONE
Chr1:23468000-23468199	hyper	7	0	75	0.0283	0.0908	3.2117	AT1G63260	-	protein_coding_gene	Symbols: TET10 | tetraspanin10 | chr1:23467105-23468945 REVERSE LENGTH=284	NONE	NONE	NONE
Chr1:2359450-2359749	hyper	8	0	110	0.0275	0.0585	2.1251	AT1G07650	-	protein_coding_gene	Symbols: | Leucine-rich repeat transmembrane protein kinase | chr1:2359817-2366423 REVERSE LENGTH=1014	NONE	NONE	NONE
Chr1:23856150-23856599	hyper	28	0	140	0.0429	0.2904	6.7654	NONE	NONE	NONE	NONE	AT1TE78500|AT1TE78505	RC/Helitron;RC/Helitron	NONE
Chr1:23988000-23988199	hyper	7	0	91	0.0095	0.082	8.5998	AT1G64583	-	protein_coding_gene	Symbols: | Tetratricopeptide repeat (TPR)-like superfamily protein | chr1:23987202-23988740 REVERSE LENGTH=512	NONE	NONE	NONE
Chr1:24092100-24092449	hyper	10	2	166	0.0383	0.0953	2.4898	AT1G64830	-	protein_coding_gene	Symbols: | Eukaryotic aspartyl protease family protein | chr1:24091271-24092566 REVERSE LENGTH=431	NONE	NONE	NONE
Chr1:24291450-24291849	hyper	18	0	143	0.1097	0.2309	2.105	NONE	NONE	NONE	NONE	NONE	NONE	AT1G65380-AT1G65390
Chr1:24454600-24454949	hyper	11	0	147	0.0815	0.1751	2.1491	NONE	NONE	NONE	NONE	AT1TE80320	LINE/L1	NONE
Chr1:24499800-24500099	hyper	7	0	105	0.0122	0.0754	6.1921	AT1G65860	-	protein_coding_gene	Symbols: FMO GS-OX1 | flavin-monooxygenase glucosinolate S-oxygenase 1 | chr1:24499210-24502678 REVERSE LENGTH=459	NONE	NONE	NONE
Chr1:24571950-24572299	hyper	13	0	143	0.0349	0.1223	3.5029	AT1G65990	-	protein_coding_gene	Symbols: | type 2 peroxiredoxin-related / thiol specific antioxidant / mal allergen family protein | chr1:24571603-24573471 REVERSE LENGTH=553	NONE	NONE	NONE
Chr1:24666750-24667049	hyper	9	0	118	0.0218	0.0676	3.099	AT1G66210	-	protein_coding_gene	Symbols: | Subtilisin-like serine endopeptidase family protein | chr1:24665735-24668650 REVERSE LENGTH=759	NONE	NONE	NONE
Chr1:24686500-24686699	hyper	9	0	85	0.0181	0.0823	4.5485	AT1G66240	-	protein_coding_gene	Symbols: ATX1, ATATX1 | homolog of anti-oxidant 1 | chr1:24686445-24687327 REVERSE LENGTH=106	NONE	NONE	NONE
Chr1:24728250-24728899	hyper	39	0	219	0.0261	0.1936	7.4253	AT1G66320	-	protein_coding_gene	Symbols: | F-box/RNI-like superfamily protein | chr1:24727041-24728614 REVERSE LENGTH=457	AT1TE81230	DNA/MuDR	NONE
Chr1:24823100-24823649	hyper	26	0	180	0.0071	0.1753	24.7241	NONE	NONE	NONE	NONE	AT1TE81525	RC/Helitron	NONE
Chr1:24954500-24954699	hyper	10	1	92	0.0807	0.1832	2.2713	AT1G66880	+	protein_coding_gene	Symbols: | Protein kinase superfamily protein | chr1:24946928-24955438 FORWARD LENGTH=1296	NONE	NONE	NONE
Chr1:25005700-25006049	hyper	10	0	145	0.0502	0.1393	2.774	AT1G67000	-	protein_coding_gene	Symbols: | Protein kinase superfamily protein | chr1:25004217-25007604 REVERSE LENGTH=892	NONE	NONE	NONE
Chr1:25150850-25151099	hyper	9	0	70	0.0119	0.1562	13.1197	NONE	NONE	NONE	NONE	NONE	NONE	AT1G67220-AT1G67230
Chr1:25260950-25261399	hyper	27	1	156	0.0201	0.1504	7.488	NONE	NONE	NONE	NONE	NONE	NONE	AT1G67420-AT1G67430
Chr1:25332450-25332749	hyper	10	1	111	0.0499	0.2226	4.4611	NONE	NONE	NONE	NONE	NONE	NONE	AT1G67580-AT1G67590
Chr1:25333100-25333399	hyper	8	0	93	0.0101	0.1525	15.049	AT1G67590	-	protein_coding_gene	Symbols: | Remorin family protein | chr1:25333137-25334472 REVERSE LENGTH=347	NONE	NONE	NONE
Chr1:25344350-25344599	hyper	14	0	91	0.0686	0.1692	2.4664	AT1G67630	-	protein_coding_gene	Symbols: POLA2 | DNA polymerase alpha 2 | chr1:25344573-25348287 REVERSE LENGTH=620	AT1TE83185	DNA/HAT	NONE
Chr1:25450200-25450399	hyper	7	0	66	0.0132	0.1437	10.8496	AT1G67870	-	protein_coding_gene	Symbols: | glycine-rich protein | chr1:25449593-25450943 REVERSE LENGTH=279	NONE	NONE	NONE
Chr1:25509750-25509949	hyper	7	0	110	0.0607	0.1321	2.178	AT1G68050	+	protein_coding_gene	Symbols: ADO3, FKF1 | flavin-binding, kelch repeat, f box 1 | chr1:25508737-25510697 FORWARD LENGTH=619	NONE	NONE	NONE
Chr1:25525400-25525749	hyper	15	0	154	0.0311	0.0928	2.9814	AT1G68110	+	protein_coding_gene	Symbols: | ENTH/ANTH/VHS superfamily protein | chr1:25524901-25526040 FORWARD LENGTH=379	NONE	NONE	NONE
Chr1:25554950-25555249	hyper	11	1	133	0.055	0.1358	2.4684	AT1G68180	+	protein_coding_gene	Symbols: | RING/U-box superfamily protein | chr1:25554816-25555562 FORWARD LENGTH=248	NONE	NONE	NONE
Chr1:255700-256099	hyper	15	0	122	0.0396	0.1592	4.0189	NONE	NONE	NONE	NONE	AT1TE00820|AT1TE00825	RC/Helitron;DNA/Pogo	NONE
Chr1:25595300-25595849	hyper	24	0	179	0.0687	0.2343	3.4101	NONE	NONE	NONE	NONE	AT1TE83950	LTR/Gypsy	NONE
Chr1:25646400-25646649	hyper	8	0	106	0.0184	0.0809	4.4052	AT1G68400	-	protein_coding_gene	Symbols: | leucine-rich repeat transmembrane protein kinase family protein | chr1:25646401-25648916 REVERSE LENGTH=670	NONE	NONE	NONE
Chr1:25650250-25650449	hyper	7	0	94	0.0565	0.1212	2.1427	AT1G68410	-	protein_coding_gene	Symbols: | Protein phosphatase 2C family protein | chr1:25650262-25652255 REVERSE LENGTH=436	NONE	NONE	NONE
Chr1:25675750-25676249	hyper	42	0	155	0.0973	0.2691	2.7652	NONE	NONE	NONE	NONE	AT1TE84185	RC/Helitron	NONE
Chr1:25676400-25677049	hyper	50	0	252	0.0189	0.1609	8.4955	AT1G68470	-	protein_coding_gene	Symbols: | Exostosin family protein | chr1:25676545-25678267 REVERSE LENGTH=455	NONE	NONE	NONE
Chr1:25735450-25735699	hyper	7	2	116	0.045	0.0928	2.0604	AT1G68560	-	protein_coding_gene	Symbols: ATXYL1, XYL1, TRG1 | alpha-xylosidase 1 | chr1:25734435-25737897 REVERSE LENGTH=915	NONE	NONE	NONE
Chr1:25769100-25769399	hyper	8	0	125	0.0203	0.0669	3.3019	AT1G68630	+	protein_coding_gene	Symbols: | PLAC8 family protein | chr1:25768653-25769458 FORWARD LENGTH=161	NONE	NONE	NONE
Chr1:25883950-25884249	hyper	7	2	146	0.0244	0.0643	2.6414	AT1G68850	-	protein_coding_gene	Symbols: | Peroxidase superfamily protein | chr1:25883806-25885177 REVERSE LENGTH=336	NONE	NONE	NONE
Chr1:25915800-25915999	hyper	7	0	90	0.0477	0.1058	2.2199	AT1G68920	+	protein_coding_gene	Symbols: | basic helix-loop-helix (bHLH) DNA-binding superfamily protein | chr1:25915620-25917675 FORWARD LENGTH=486	NONE	NONE	NONE
Chr1:26041550-26041849	hyper	7	2	127	0.0135	0.0359	2.66	AT1G69270	-	protein_coding_gene	Symbols: RPK1 | receptor-like protein kinase 1 | chr1:26040877-26042499 REVERSE LENGTH=540	NONE	NONE	NONE
Chr1:26102050-26102299	hyper	7	0	106	0.0329	0.0733	2.226	AT1G69440	-	protein_coding_gene	Symbols: AGO7, ZIP | Argonaute family protein | chr1:26101565-26105016 REVERSE LENGTH=990	NONE	NONE	NONE
Chr1:26179750-26180199	hyper	23	0	166	0.0487	0.1977	4.0641	NONE	NONE	NONE	NONE	NONE	NONE	AT1G69588-AT1G69600
Chr1:26344300-26344649	hyper	18	0	157	0.0655	0.1621	2.4768	AT1G69940	-	protein_coding_gene	Symbols: ATPPME1, PPME1 | Pectin lyase-like superfamily protein | chr1:26343549-26344971 REVERSE LENGTH=361	NONE	NONE	NONE
Chr1:26599000-26599299	hyper	9	0	86	0.005	0.0691	13.9114	AT1G70550	+	protein_coding_gene	Symbols: | Protein of Unknown Function (DUF239) | chr1:26597510-26599888 FORWARD LENGTH=465	NONE	NONE	NONE
Chr1:26627450-26627799	hyper	7	0	148	0.0108	0.0418	3.8725	AT1G70620	+	protein_coding_gene	Symbols: | cyclin-related | chr1:26626634-26630755 FORWARD LENGTH=897	NONE	NONE	NONE
Chr1:26639400-26639699	hyper	9	1	109	0.0443	0.0857	1.9349	AT1G70650	+	protein_coding_gene	Symbols: | Ran BP2/NZF zinc finger-like superfamily protein | chr1:26638158-26640126 FORWARD LENGTH=466	NONE	NONE	NONE
Chr1:26756350-26757199	hyper	45	0	334	0.0583	0.1931	3.3092	AT1G70960	+	protein_coding_gene	Symbols: | F-box and associated interaction domains-containing protein | chr1:26756253-26757362 FORWARD LENGTH=369	NONE	NONE	NONE
Chr1:26783550-26783749	hyper	8	0	94	0.0571	0.1258	2.2047	AT1G71010	+	protein_coding_gene	Symbols: FAB1C | FORMS APLOID AND BINUCLEATE CELLS 1C | chr1:26782839-26788712 FORWARD LENGTH=1648	NONE	NONE	NONE
Chr1:26872350-26872649	hyper	7	0	131	0.008	0.0358	4.484	AT1G71290	+	protein_coding_gene	Symbols: | F-box associated ubiquitination effector family protein | chr1:26872643-26873242 FORWARD LENGTH=199	NONE	NONE	NONE
Chr1:26939800-26940149	hyper	13	0	181	0.0448	0.0947	2.1124	AT1G71530	+	protein_coding_gene	Symbols: | Protein kinase superfamily protein | chr1:26939766-26942306 FORWARD LENGTH=655	NONE	NONE	NONE
Chr1:27032650-27032899	hyper	8	0	123	0.0053	0.0559	10.5517	AT1G71870	-	protein_coding_gene	Symbols: | MATE efflux family protein | chr1:27032456-27034895 REVERSE LENGTH=510	NONE	NONE	NONE
Chr1:27098800-27099149	hyper	17	2	162	0.0619	0.1293	2.0884	AT1G71980	+	protein_coding_gene	Symbols: | Protease-associated (PA) RING/U-box zinc finger family protein | chr1:27098250-27099881 FORWARD LENGTH=448	NONE	NONE	NONE
Chr1:27511850-27512149	hyper	8	0	117	0.0055	0.0599	10.8598	AT1G73170	-	protein_coding_gene	Symbols: | P-loop containing nucleoside triphosphate hydrolases superfamily protein | chr1:27511722-27514783 REVERSE LENGTH=666	NONE	NONE	NONE
Chr1:27673000-27673299	hyper	8	0	117	0.0026	0.0562	21.9319	AT1G73600|AT1G73602	+|+	protein_coding_gene|protein_coding_gene	Symbols: | S-adenosyl-L-methionine-dependent methyltransferases superfamily protein | chr1:27670825-27673400 FORWARD LENGTH=490;Symbols: CPuORF32 | conserved peptide upstream open reading frame 32 | chr1:27670626-27670703 FORWARD LENGTH=25	NONE	NONE	NONE
Chr1:27794050-27794249	hyper	9	0	91	0.0096	0.0957	9.9648	AT1G73920	+	protein_coding_gene	Symbols: | alpha/beta-Hydrolases superfamily protein | chr1:27791194-27794698 FORWARD LENGTH=704	NONE	NONE	NONE
Chr1:27930250-27930549	hyper	10	0	128	0.023	0.1064	4.628	AT1G74280	+	protein_coding_gene	Symbols: | alpha/beta-Hydrolases superfamily protein | chr1:27929758-27931126 FORWARD LENGTH=372	NONE	NONE	NONE
Chr1:27932400-27932599	hyper	11	0	91	0.0362	0.1092	3.0115	AT1G74290	+	protein_coding_gene	Symbols: | alpha/beta-Hydrolases superfamily protein | chr1:27931836-27934268 FORWARD LENGTH=371	NONE	NONE	NONE
Chr1:28076950-28077749	hyper	47	0	394	0.0207	0.1339	6.454	AT1G74720	+	protein_coding_gene	Symbols: QKY | C2 calcium/lipid-binding plant phosphoribosyltransferase family protein | chr1:28075173-28078418 FORWARD LENGTH=1081	NONE	NONE	NONE
Chr1:28080700-28081049	hyper	10	0	131	0.0194	0.068	3.5085	AT1G74740	-	protein_coding_gene	Symbols: CPK30, CDPK1A, ATCPK30 | calcium-dependent protein kinase 30 | chr1:28080199-28082476 REVERSE LENGTH=541	NONE	NONE	NONE
Chr1:281950-282249	hyper	10	0	114	0.0034	0.0595	17.6522	AT1G01770	+	protein_coding_gene	Symbols: | unknown protein; CONTAINS InterPro DOMAIN/s: Protein of unknown function DUF1446 (InterPro:IPR010839); Has 1597 Blast hits to 1509 proteins in 306 species: Archae - 4; Bacteria - 843; Metazoa - 22; Fungi - 131; Plants - 31; Viruses - 0; Other Eukaryotes - 566 (source: NCBI BLink). | chr1:278759-282490 FORWARD LENGTH=632	NONE	NONE	NONE
Chr1:28696700-28697049	hyper	7	0	150	0.0023	0.0247	10.7033	AT1G76490	+	protein_coding_gene	Symbols: HMG1, HMGR1, AtHMGR1 | hydroxy methylglutaryl CoA reductase 1 | chr1:28695801-28698206 FORWARD LENGTH=642	NONE	NONE	NONE
Chr1:29138800-29138999	hyper	7	0	79	0.031	0.1042	3.3589	AT1G77550	-	protein_coding_gene	Symbols: | tubulin-tyrosine ligases;tubulin-tyrosine ligases | chr1:29138490-29142965 REVERSE LENGTH=855	NONE	NONE	NONE
Chr1:29145700-29146199	hyper	18	1	227	0.0235	0.0923	3.9312	AT1G77580	-	protein_coding_gene	Symbols: | Plant protein of unknown function (DUF869) | chr1:29144632-29146600 REVERSE LENGTH=629	NONE	NONE	NONE
Chr1:29316650-29316899	hyper	7	0	76	0.0497	0.119	2.3964	AT1G77980	-	protein_coding_gene	Symbols: AGL66 | AGAMOUS-like 66 | chr1:29315212-29317067 REVERSE LENGTH=332	NONE	NONE	NONE
Chr1:29337000-29337399	hyper	25	0	126	0.0224	0.196	8.7676	NONE	NONE	NONE	NONE	NONE	NONE	AT1G78010-AT1G78020
Chr1:29417900-29418199	hyper	7	0	150	0.01	0.0563	5.6521	AT1G78180	+	protein_coding_gene	Symbols: | Mitochondrial substrate carrier family protein | chr1:29416919-29418525 FORWARD LENGTH=418	NONE	NONE	NONE
Chr1:29553250-29553499	hyper	8	0	99	0.0034	0.0647	19.2568	AT1G78580	-	protein_coding_gene	Symbols: ATTPS1, TPS1 | trehalose-6-phosphate synthase | chr1:29552495-29557482 REVERSE LENGTH=942	NONE	NONE	NONE
Chr1:2966150-2966449	hyper	9	0	128	0.0363	0.1032	2.8419	AT1G09190	-	protein_coding_gene	Symbols: | Tetratricopeptide repeat (TPR)-like superfamily protein | chr1:2966263-2967717 REVERSE LENGTH=484	NONE	NONE	NONE
Chr1:29773550-29773749	hyper	7	0	76	0.0441	0.1299	2.9417	AT1G79150	-	protein_coding_gene	Symbols: | binding | chr1:29772716-29777874 REVERSE LENGTH=830	NONE	NONE	NONE
Chr1:29793650-29793899	hyper	7	0	116	0.0503	0.102	2.0271	AT1G79190	+	protein_coding_gene	Symbols: | ARM repeat superfamily protein | chr1:29788639-29794116 FORWARD LENGTH=1335	NONE	NONE	NONE
Chr1:2986850-2987349	hyper	31	0	157	0.0278	0.2178	7.8413	AT1G09245	-	protein_coding_gene	Symbols: | Plant self-incompatibility protein S1 family | chr1:2986948-2987367 REVERSE LENGTH=139	AT1TE09700|AT1TE09705	RC/Helitron;DNA/MuDR	NONE
Chr1:29902650-29902949	hyper	16	0	139	0.0612	0.1426	2.3301	AT1G79490	+	protein_coding_gene	Symbols: EMB2217 | Pentatricopeptide repeat (PPR) superfamily protein | chr1:29900617-29903127 FORWARD LENGTH=836	NONE	NONE	NONE
Chr1:29933500-29933749	hyper	8	0	100	0.0064	0.0913	14.3274	AT1G79570	-	protein_coding_gene	Symbols: | Protein kinase superfamily protein with octicosapeptide/Phox/Bem1p domain | chr1:29932856-29937540 REVERSE LENGTH=1248	NONE	NONE	NONE
Chr1:30080050-30080399	hyper	20	0	184	0.0519	0.1179	2.274	AT1G79960	-	protein_coding_gene	Symbols: ATOFP14, OFP14 | ovate family protein 14 | chr1:30079665-30080549 REVERSE LENGTH=294	NONE	NONE	NONE
Chr1:30196050-30196349	hyper	7	0	142	0.017	0.0559	3.2943	AT1G80310	+	protein_coding_gene	Symbols: | sulfate transmembrane transporters | chr1:30194951-30196345 FORWARD LENGTH=464	NONE	NONE	NONE
Chr1:30349950-30350149	hyper	7	0	72	0.1009	0.2079	2.0616	AT1G80750	+	protein_coding_gene	Symbols: | Ribosomal protein L30/L7 family protein | chr1:30349052-30350434 FORWARD LENGTH=247	NONE	NONE	NONE
Chr1:3237450-3238199	hyper	36	0	341	0.026	0.1076	4.1375	AT1G09940	-	protein_coding_gene	Symbols: HEMA2 | Glutamyl-tRNA reductase family protein | chr1:3237224-3239262 REVERSE LENGTH=530	NONE	NONE	NONE
Chr1:3282400-3283249	hyper	46	1	391	0.0182	0.1018	5.5858	AT1G10050	+	protein_coding_gene	Symbols: | glycosyl hydrolase family 10 protein / carbohydrate-binding domain-containing protein | chr1:3279270-3283444 FORWARD LENGTH=1063	NONE	NONE	NONE
Chr1:3573000-3573199	hyper	7	0	61	0.1447	0.3392	2.3448	AT1G10745	+	protein_coding_gene	Symbols: | Maternally expressed gene (MEG) family protein | chr1:3572710-3573066 FORWARD LENGTH=82	AT1TE11630	RC/Helitron	NONE
Chr1:359400-359749	hyper	10	0	182	0.0232	0.0818	3.531	AT1G02050	-	protein_coding_gene	Symbols: LAP6 | Chalcone and stilbene synthase family protein | chr1:359164-360441 REVERSE LENGTH=395	NONE	NONE	NONE
Chr1:3679700-3680049	hyper	10	0	158	0.039	0.093	2.385	AT1G11040	-	protein_coding_gene	Symbols: | HSP40/DnaJ peptide-binding protein | chr1:3679225-3680924 REVERSE LENGTH=438	NONE	NONE	NONE
Chr1:3798150-3798349	hyper	8	0	97	0.0135	0.0606	4.4925	AT1G11300	+	protein_coding_gene	Symbols: | protein serine/threonine kinases;protein kinases;ATP binding;sugar binding;kinases;carbohydrate binding | chr1:3794389-3800719 FORWARD LENGTH=1650	NONE	NONE	NONE
Chr1:4251650-4251949	hyper	9	0	117	0.0245	0.0953	3.8876	AT1G12470	+	protein_coding_gene	Symbols: | zinc ion binding | chr1:4251359-4257201 FORWARD LENGTH=988	NONE	NONE	NONE
Chr1:432650-432999	hyper	10	0	89	0.0628	0.2894	4.6083	NONE	NONE	NONE	NONE	AT1TE01405	LINE/L1	NONE
Chr1:4724900-4725199	hyper	10	0	117	0.0587	0.1299	2.2116	AT1G13780	+	protein_coding_gene	Symbols: | F-box/RNI-like/FBD-like domains-containing protein | chr1:4724681-4726314 FORWARD LENGTH=456	NONE	NONE	NONE
Chr1:4856050-4856349	hyper	9	0	116	0.0238	0.0783	3.2898	AT1G14205	+	protein_coding_gene	Symbols: | Ribosomal L18p/L5e family protein | chr1:4855582-4856762 FORWARD LENGTH=165	NONE	NONE	NONE
Chr1:4898000-4898349	hyper	8	0	130	0.0332	0.0856	2.5758	AT1G14340	+	protein_coding_gene	Symbols: | RNA-binding (RRM/RBD/RNP motifs) family protein | chr1:4897709-4898776 FORWARD LENGTH=244	NONE	NONE	NONE
Chr1:5342600-5342949	hyper	10	0	171	0.0098	0.0486	4.9587	AT1G15540	+	protein_coding_gene	Symbols: | 2-oxoglutarate (2OG) and Fe(II)-dependent oxygenase superfamily protein | chr1:5342587-5343705 FORWARD LENGTH=320	NONE	NONE	NONE
Chr1:5430500-5430699	hyper	8	0	97	0.0308	0.0887	2.8791	AT1G15780	-	protein_coding_gene	Symbols: | unknown protein; BEST Arabidopsis thaliana protein match is: unknown protein (TAIR:AT2G10440.1); Has 103701 Blast hits to 43153 proteins in 1828 species: Archae - 30; Bacteria - 7385; Metazoa - 38639; Fungi - 11531; Plants - 7727; Viruses - 307; Other Eukaryotes - 38082 (source: NCBI BLink). | chr1:5430446-5435921 REVERSE LENGTH=1335	NONE	NONE	NONE
Chr1:5597850-5598149	hyper	10	2	136	0.0325	0.0736	2.2652	AT1G16370	+	protein_coding_gene	Symbols: ATOCT6, OCT6 | organic cation/carnitine transporter 6 | chr1:5596762-5598327 FORWARD LENGTH=521	NONE	NONE	NONE
Chr1:5866650-5866949	hyper	15	0	121	0.0754	0.208	2.7562	AT1G17150	+	protein_coding_gene	Symbols: | Pectin lyase-like superfamily protein | chr1:5865707-5867495 FORWARD LENGTH=402	NONE	NONE	NONE
Chr1:6127750-6128099	hyper	13	0	131	0.0191	0.0837	4.3761	NONE	NONE	NONE	NONE	AT1TE19815	LINE/L1	NONE
Chr1:6155000-6155199	hyper	9	0	98	0.0543	0.1214	2.2343	AT1G17890	-	protein_coding_gene	Symbols: GER2 | NAD(P)-binding Rossmann-fold superfamily protein | chr1:6154478-6155596 REVERSE LENGTH=328	NONE	NONE	NONE
Chr1:6163700-6163899	hyper	8	0	76	0.0539	0.1304	2.4183	AT1G17920	-	protein_coding_gene	Symbols: HDG12 | homeodomain GLABROUS 12 | chr1:6162214-6165033 REVERSE LENGTH=687	NONE	NONE	NONE
Chr1:6212100-6212299	hyper	7	0	88	0.0244	0.1091	4.4716	AT1G18060	-	protein_coding_gene	Symbols: | unknown protein; INVOLVED IN: biological_process unknown; LOCATED IN: chloroplast; EXPRESSED IN: 22 plant structures; EXPRESSED DURING: 13 growth stages; Has 74 Blast hits to 74 proteins in 29 species: Archae - 0; Bacteria - 19; Metazoa - 0; Fungi - 0; Plants - 49; Viruses - 0; Other Eukaryotes - 6 (source: NCBI BLink). | chr1:6212065-6213314 REVERSE LENGTH=226	NONE	NONE	NONE
Chr1:6263200-6263449	hyper	12	0	102	0.158	0.2919	1.8475	NONE	NONE	NONE	NONE	NONE	NONE	AT1G18190-AT1G18200
Chr1:6302400-6302649	hyper	11	0	115	0.044	0.0928	2.11	AT1G18310	-	protein_coding_gene	Symbols: | glycosyl hydrolase family 81 protein | chr1:6301200-6303956 REVERSE LENGTH=649	AT1TE20410	LTR/Copia	NONE
Chr1:6328800-6329149	hyper	14	0	150	0.0019	0.0428	22.715	AT1G18390	+	protein_coding_gene	Symbols: | Protein kinase superfamily protein | chr1:6325876-6329935 FORWARD LENGTH=648	NONE	NONE	NONE
Chr1:6640150-6640349	hyper	8	0	66	0.0125	0.1122	8.9508	NONE	NONE	NONE	NONE	NONE	NONE	AT1G19220-AT1G19230
Chr1:6828900-6829199	hyper	7	0	121	0.022	0.0673	3.0633	AT1G19750	+	protein_coding_gene	Symbols: | Transducin/WD40 repeat-like superfamily protein | chr1:6826997-6830061 FORWARD LENGTH=450	NONE	NONE	NONE
Chr1:6927250-6927599	hyper	9	0	93	0.1071	0.1875	1.7517	NONE	NONE	NONE	NONE	NONE	NONE	AT1G19950-AT1G19960
Chr1:7116700-7116999	hyper	7	0	111	0.0237	0.0763	3.2196	AT1G20550	-	protein_coding_gene	Symbols: | O-fucosyltransferase family protein | chr1:7115485-7117936 REVERSE LENGTH=564	NONE	NONE	NONE
Chr1:7123050-7123549	hyper	20	0	189	0.0178	0.1003	5.6409	AT1G20570	-	protein_coding_gene	Symbols: | Spc97 / Spc98 family of spindle pole body (SBP) component | chr1:7122018-7126559 REVERSE LENGTH=976	NONE	NONE	NONE
Chr1:7247050-7247399	hyper	7	0	170	0.0221	0.0637	2.8847	AT1G20840	-	protein_coding_gene	Symbols: TMT1 | tonoplast monosaccharide transporter1 | chr1:7245107-7247674 REVERSE LENGTH=734	NONE	NONE	NONE
Chr1:7391050-7391349	hyper	9	0	160	0.0378	0.0793	2.0957	AT1G21110	-	protein_coding_gene	Symbols: | O-methyltransferase family protein | chr1:7390110-7391419 REVERSE LENGTH=373	NONE	NONE	NONE
Chr1:7446100-7446399	hyper	8	0	134	0.0243	0.0631	2.5988	AT1G21270	+	protein_coding_gene	Symbols: WAK2 | wall-associated kinase 2 | chr1:7444997-7447345 FORWARD LENGTH=732	NONE	NONE	NONE
Chr1:7683100-7683449	hyper	13	0	139	0.0695	0.1533	2.2047	AT1G21890	-	protein_coding_gene	Symbols: | nodulin MtN21 /EamA-like transporter family protein | chr1:7682808-7685581 REVERSE LENGTH=389	NONE	NONE	NONE
Chr1:7881600-7881949	hyper	12	0	133	0.0174	0.0993	5.695	AT1G22310	-	protein_coding_gene	Symbols: MBD8, ATMBD8 | methyl-CPG-binding domain 8 | chr1:7881714-7883418 REVERSE LENGTH=425	NONE	NONE	NONE
Chr1:8276100-8276449	hyper	18	1	96	0.0695	0.2651	3.8154	NONE	NONE	NONE	NONE	AT1TE26660	RC/Helitron	NONE
Chr1:8377750-8378049	hyper	7	0	100	0.0177	0.0753	4.254	AT1G23690	-	protein_coding_gene	Symbols: | Domain of unknown function DUF220 | chr1:8377433-8378634 REVERSE LENGTH=273	NONE	NONE	NONE
Chr1:8476900-8477149	hyper	7	1	67	0.0181	0.1823	10.0644	NONE	NONE	NONE	NONE	NONE	NONE	AT1G23950-AT1G23960
Chr1:8622000-8622249	hyper	9	0	102	0.0664	0.206	3.1006	NONE	NONE	NONE	NONE	AT1TE27810|AT1TE27820|AT1TE27825|AT1TE27830	RC/Helitron;RC/Helitron;RC/Helitron;RC/Helitron	NONE
Chr1:8664650-8664949	hyper	8	0	129	0.0035	0.0306	8.6222	AT1G24450	+	protein_coding_gene	Symbols: NFD2 | Ribonuclease III family protein | chr1:8664201-8665077 FORWARD LENGTH=191	NONE	NONE	NONE
Chr1:8737950-8738299	hyper	16	0	133	0.0894	0.2317	2.5928	NONE	NONE	NONE	NONE	NONE	NONE	AT1G24650-AT1G24706
Chr1:8740550-8740749	hyper	7	0	73	0.0756	0.1982	2.6215	NONE	NONE	NONE	NONE	NONE	NONE	AT1G24650-AT1G24706
Chr1:8812500-8812899	hyper	14	0	59	0.0157	0.3815	24.2254	AT1G25097	-	protein_coding_gene	Symbols: | unknown protein; BEST Arabidopsis thaliana protein match is: unknown protein (TAIR:AT1G24822.1); Has 12 Blast hits to 12 proteins in 1 species: Archae - 0; Bacteria - 0; Metazoa - 0; Fungi - 0; Plants - 12; Viruses - 0; Other Eukaryotes - 0 (source: NCBI BLink). | chr1:8811905-8814788 REVERSE LENGTH=216	NONE	NONE	NONE
Chr1:8865050-8865249	hyper	9	0	84	0.057	0.1534	2.6904	AT1G25280	+	protein_coding_gene	Symbols: AtTLP10, TLP10 | tubby like protein 10 | chr1:8864961-8866608 FORWARD LENGTH=445	NONE	NONE	NONE
Chr1:9033800-9034099	hyper	8	0	130	0.0386	0.1374	3.558	AT1G26130	+	protein_coding_gene	Symbols: | ATPase E1-E2 type family protein / haloacid dehalogenase-like hydrolase family protein | chr1:9033600-9038246 FORWARD LENGTH=1184	NONE	NONE	NONE
Chr1:9126950-9127449	hyper	25	0	217	0.014	0.0932	6.646	AT1G26380	-	protein_coding_gene	Symbols: | FAD-binding Berberine family protein | chr1:9126901-9128508 REVERSE LENGTH=535	NONE	NONE	NONE
Chr1:9131350-9131599	hyper	7	0	112	0.0107	0.0352	3.2863	AT1G26390	-	protein_coding_gene	Symbols: | FAD-binding Berberine family protein | chr1:9130164-9131756 REVERSE LENGTH=530	NONE	NONE	NONE
Chr1:9133450-9133649	hyper	7	0	89	0.0065	0.0622	9.5285	AT1G26400	-	protein_coding_gene	Symbols: | FAD-binding Berberine family protein | chr1:9133291-9134874 REVERSE LENGTH=527	NONE	NONE	NONE
Chr1:9138800-9139299	hyper	27	2	216	0.0267	0.0966	3.6182	AT1G26410	-	protein_coding_gene	Symbols: | FAD-binding Berberine family protein | chr1:9138774-9140432 REVERSE LENGTH=552	NONE	NONE	NONE
Chr1:9450200-9450549	hyper	12	0	167	0.0061	0.0699	11.3643	AT1G27200	-	protein_coding_gene	Symbols: | Domain of unknown function (DUF23) | chr1:9449812-9451539 REVERSE LENGTH=575	NONE	NONE	NONE
Chr1:95100-95399	hyper	10	0	123	0.0078	0.0526	6.7188	AT1G01220	+	protein_coding_gene	Symbols: FKGP, AtFKGP | L-fucokinase/GDP-L-fucose pyrophosphorylase | chr1:91750-95552 FORWARD LENGTH=1055	NONE	NONE	NONE
Chr1:962200-962399	hyper	9	0	96	0.0372	0.1037	2.7903	AT1G03830	-	protein_coding_gene	Symbols: | guanylate-binding family protein | chr1:962128-966622 REVERSE LENGTH=991	NONE	NONE	NONE
Chr1:9641000-9641299	hyper	8	0	126	0.0249	0.0639	2.5624	AT1G27700	-	protein_coding_gene	Symbols: | Syntaxin/t-SNARE family protein | chr1:9640394-9641752 REVERSE LENGTH=297	NONE	NONE	NONE
Chr1:9708400-9708699	hyper	10	0	81	0.0983	0.2903	2.9534	NONE	NONE	NONE	NONE	NONE	NONE	AT1G27870-AT1G27880
Chr1:9726950-9727299	hyper	11	0	133	0.0108	0.1138	10.5641	AT1G27920	+	protein_coding_gene	Symbols: MAP65-8 | microtubule-associated protein 65-8 | chr1:9727106-9729848 FORWARD LENGTH=562	NONE	NONE	NONE
Chr1:9742300-9742599	hyper	8	0	130	0.0334	0.0867	2.5989	AT1G27960	-	protein_coding_gene	Symbols: ECT9 | evolutionarily conserved C-terminal region 9 | chr1:9742359-9745648 REVERSE LENGTH=539	NONE	NONE	NONE
Chr1:9759700-9759949	hyper	10	0	60	0.0203	0.1607	7.8952	NONE	NONE	NONE	NONE	NONE	NONE	AT1G28000-AT1G28007
Chr1:9878400-9878749	hyper	10	0	124	0.008	0.0487	6.0607	AT1G28260	-	protein_coding_gene	Symbols: | Telomerase activating protein Est1 | chr1:9875776-9878782 REVERSE LENGTH=880	NONE	NONE	NONE
Chr1:9926700-9926999	hyper	9	0	94	0.0318	0.1527	4.8023	NONE	NONE	NONE	NONE	AT1TE32000	LINE/L1	NONE
Chr1:9998500-9998849	hyper	13	0	152	0.0298	0.0961	3.2215	AT1G28440	+	protein_coding_gene	Symbols: HSL1 | HAESA-like 1 | chr1:9996914-10000171 FORWARD LENGTH=996	NONE	NONE	NONE
Chr2:10114250-10114599	hyper	11	0	106	0.0534	0.2231	4.1814	NONE	NONE	NONE	NONE	AT2TE43265	RC/Helitron	NONE
Chr2:10120800-10121099	hyper	8	0	128	0.0342	0.0806	2.3594	AT2G23770	-	protein_coding_gene	Symbols: | protein kinase family protein / peptidoglycan-binding LysM domain-containing protein | chr2:10120242-10122080 REVERSE LENGTH=612	NONE	NONE	NONE
Chr2:10139100-10139299	hyper	7	0	37	0.0052	0.2025	38.5748	NONE	NONE	NONE	NONE	AT2TE43370	RC/Helitron	NONE
Chr2:10233650-10233899	hyper	8	1	118	0.0158	0.0472	2.9895	AT2G24070	-	protein_coding_gene	Symbols: QWRF4 | Family of unknown function (DUF566) | chr2:10231822-10233986 REVERSE LENGTH=609	NONE	NONE	NONE
Chr2:10283800-10284149	hyper	7	0	138	0.0022	0.0335	15.3836	AT2G24190	-	protein_coding_gene	Symbols: | NAD(P)-binding Rossmann-fold superfamily protein | chr2:10283740-10284934 REVERSE LENGTH=296	NONE	NONE	NONE
Chr2:10312200-10312499	hyper	7	0	100	0.0168	0.1017	6.0466	AT2G24240	+	protein_coding_gene	Symbols: | BTB/POZ domain with WD40/YVTN repeat-like protein | chr2:10310838-10312163 FORWARD LENGTH=441	NONE	NONE	NONE
Chr2:10328500-10328849	hyper	9	0	134	0.0043	0.0522	12.1099	AT2G24270	-	protein_coding_gene	Symbols: ALDH11A3 | aldehyde dehydrogenase 11A3 | chr2:10327325-10329601 REVERSE LENGTH=496	NONE	NONE	NONE
Chr2:10570200-10570549	hyper	11	0	130	0.0214	0.0731	3.4204	NONE	NONE	NONE	NONE	NONE	NONE	AT2G24790-AT2G24800
Chr2:10579750-10580099	hyper	16	0	125	0.0647	0.1513	2.3374	NONE	NONE	NONE	NONE	AT2TE45410	DNA/HAT	NONE
Chr2:1069750-1070049	hyper	7	0	115	0.049	0.0991	2.0219	AT2G03520	+	protein_coding_gene	Symbols: ATUPS4, UPS4 | ureide permease 4 | chr2:1069494-1071269 FORWARD LENGTH=401	NONE	NONE	NONE
Chr2:10732850-10733249	hyper	17	1	164	0.0182	0.1013	5.5698	NONE	NONE	NONE	NONE	NONE	NONE	AT2G25185-AT2G25190
Chr2:10750800-10751099	hyper	7	0	104	0.0466	0.0783	1.6797	NONE	NONE	NONE	NONE	NONE	NONE	AT2G25230-AT2G25240
Chr2:10844900-10845149	hyper	8	0	119	0.0287	0.0923	3.2118	AT2G25480	+	protein_coding_gene	Symbols: | TPX2 (targeting protein for Xklp2) protein family | chr2:10843449-10845343 FORWARD LENGTH=403	NONE	NONE	NONE
Chr2:10850150-10850399	hyper	8	0	92	0.0013	0.0447	34.7717	AT2G25490	-	protein_coding_gene	Symbols: EBF1, FBL6 | EIN3-binding F box protein 1 | chr2:10848018-10850275 REVERSE LENGTH=628	NONE	NONE	NONE
Chr2:10909300-10909749	hyper	20	0	179	0.0834	0.1676	2.0106	AT2G25630	+	protein_coding_gene	Symbols: BGLU14 | beta glucosidase 14 | chr2:10908360-10909880 FORWARD LENGTH=489	NONE	NONE	NONE
Chr2:10933550-10933799	hyper	7	1	88	0.0152	0.0865	5.6889	AT2G25680	-	protein_coding_gene	Symbols: MOT1 | molybdate transporter 1 | chr2:10933167-10934537 REVERSE LENGTH=456	NONE	NONE	NONE
Chr2:10944250-10944549	hyper	12	2	94	0.1118	0.267	2.3892	NONE	NONE	NONE	NONE	NONE	NONE	AT2G25690-AT2G25697
Chr2:1112300-1112549	hyper	10	0	89	0.0312	0.1313	4.2133	NONE	NONE	NONE	NONE	NONE	NONE	AT2G03640-AT2G03667
Chr2:11226700-11226999	hyper	9	2	140	0.0112	0.0406	3.6138	AT2G26380	-	protein_coding_gene	Symbols: | Leucine-rich repeat (LRR) family protein | chr2:11226615-11228057 REVERSE LENGTH=480	NONE	NONE	NONE
Chr2:11246350-11246549	hyper	8	0	62	0.0493	0.2198	4.4597	NONE	NONE	NONE	NONE	NONE	NONE	AT2G26430-AT2G26440
Chr2:11299900-11300199	hyper	8	0	130	0.017	0.0573	3.3736	AT2G26570	+	protein_coding_gene	Symbols: WEB1 | Plant protein of unknown function (DUF827) | chr2:11299565-11302076 FORWARD LENGTH=807	NONE	NONE	NONE
Chr2:11330400-11330599	hyper	8	0	90	0.0041	0.0732	17.7843	AT2G26640	+	protein_coding_gene	Symbols: KCS11 | 3-ketoacyl-CoA synthase 11 | chr2:11330094-11331623 FORWARD LENGTH=509	NONE	NONE	NONE
Chr2:11429050-11429399	hyper	11	0	137	0.0498	0.1318	2.6454	AT2G26800	-	protein_coding_gene	Symbols: | Aldolase superfamily protein | chr2:11429192-11432185 REVERSE LENGTH=433	NONE	NONE	NONE
Chr2:11482450-11482699	hyper	7	0	104	0.0111	0.1166	10.4919	AT2G26910	+	protein_coding_gene	Symbols: PDR4, ATPDR4 | pleiotropic drug resistance 4 | chr2:11481623-11487874 FORWARD LENGTH=1420	NONE	NONE	NONE
Chr2:11546950-11547349	hyper	19	3	182	0.0377	0.1104	2.9312	AT2G27050	+	protein_coding_gene	Symbols: EIL1, AtEIL1 | ETHYLENE-INSENSITIVE3-like 1 | chr2:11546314-11548068 FORWARD LENGTH=584	NONE	NONE	NONE
Chr2:11551750-11552049	hyper	8	0	130	0.0043	0.0682	15.9775	AT2G27060	+	protein_coding_gene	Symbols: | Leucine-rich repeat protein kinase family protein | chr2:11551288-11554577 FORWARD LENGTH=1020	NONE	NONE	NONE
Chr2:11645650-11646199	hyper	26	0	170	0.0894	0.2885	3.2253	NONE	NONE	NONE	NONE	NONE	NONE	AT2G27228-AT2G27229
Chr2:11740150-11740449	hyper	10	0	102	0.0949	0.2188	2.3056	NONE	NONE	NONE	NONE	AT2TE51030	LTR/Gypsy	NONE
Chr2:11964200-11964449	hyper	8	0	71	0.0903	0.2767	3.0654	NONE	NONE	NONE	NONE	AT2TE52075|AT2TE52080	RC/Helitron;LINE/L1	NONE
Chr2:11964600-11964949	hyper	16	0	41	0.1023	0.3769	3.6844	NONE	NONE	NONE	NONE	AT2TE52085	LINE?	NONE
Chr2:12000850-12001049	hyper	7	0	91	0.0324	0.1182	3.6468	AT2G28150	+	protein_coding_gene	Symbols: | Domain of unknown function (DUF966) | chr2:12000015-12002227 FORWARD LENGTH=540	NONE	NONE	NONE
Chr2:12044000-12044199	hyper	8	0	74	0.0265	0.108	4.0714	AT2G28250	+	protein_coding_gene	Symbols: NCRK | Protein kinase superfamily protein | chr2:12044004-12046339 FORWARD LENGTH=565	NONE	NONE	NONE
Chr2:12051950-12052199	hyper	8	0	111	0.0299	0.0906	3.0327	AT2G28260	+	protein_coding_gene	Symbols: ATCNGC15, CNGC15 | cyclic nucleotide-gated channel 15 | chr2:12049989-12052453 FORWARD LENGTH=678	NONE	NONE	NONE
Chr2:12161600-12161899	hyper	12	0	110	0.0449	0.1006	2.2439	AT2G28440	+	protein_coding_gene	Symbols: | proline-rich family protein | chr2:12161226-12162032 FORWARD LENGTH=268	NONE	NONE	NONE
Chr2:1225850-1226149	hyper	8	0	109	0.0409	0.129	3.1582	NONE	NONE	NONE	NONE	NONE	NONE	AT2G03938-AT2G03955
Chr2:12275950-12276499	hyper	14	0	245	0.0175	0.0502	2.8701	AT2G28630	-	protein_coding_gene	Symbols: KCS12 | 3-ketoacyl-CoA synthase 12 | chr2:12275719-12277149 REVERSE LENGTH=476	NONE	NONE	NONE
Chr2:12377250-12377499	hyper	7	0	60	0.0386	0.1754	4.549	NONE	NONE	NONE	NONE	NONE	NONE	AT2G28830-AT2G28840
Chr2:12539200-12539449	hyper	10	0	107	0.0166	0.1017	6.1439	NONE	NONE	NONE	NONE	AT2TE54780	LTR/Copia	NONE
Chr2:12616800-12617149	hyper	11	0	158	0.017	0.0769	4.5133	AT2G29410	+	protein_coding_gene	Symbols: MTPB1, ATMTPB1 | metal tolerance protein B1 | chr2:12616810-12617937 FORWARD LENGTH=375	NONE	NONE	NONE
Chr2:12622900-12623399	hyper	25	0	184	0.0377	0.1494	3.9634	NONE	NONE	NONE	NONE	NONE	NONE	AT2G29440-AT2G29450
Chr2:1290100-1290399	hyper	12	1	131	0.0441	0.1065	2.415	AT2G04032	+	protein_coding_gene	Symbols: ZIP7 | zinc transporter 7 precursor | chr2:1289944-1291251 FORWARD LENGTH=365	NONE	NONE	NONE
Chr2:13001350-13001999	hyper	32	0	256	0.0243	0.1083	4.4513	AT2G30505	-	protein_coding_gene	Symbols: | Late embryogenesis abundant (LEA) hydroxyproline-rich glycoprotein family | chr2:13001121-13002086 REVERSE LENGTH=321	NONE	NONE	NONE
Chr2:13273800-13274099	hyper	8	0	127	0.0124	0.0491	3.9664	AT2G31150	+	protein_coding_gene	Symbols: | ATP binding;ATPases, coupled to transmembrane movement of ions, phosphorylative mechanism | chr2:13273321-13274405 FORWARD LENGTH=309	NONE	NONE	NONE
Chr2:13537350-13537749	hyper	22	0	178	0.0501	0.1512	3.0214	AT2G31830	-	protein_coding_gene	Symbols: | endonuclease/exonuclease/phosphatase family protein | chr2:13532905-13537665 REVERSE LENGTH=1144	NONE	NONE	NONE
Chr2:13941600-13941849	hyper	7	0	114	0.0468	0.108	2.3079	AT2G32860	+	protein_coding_gene	Symbols: BGLU33 | beta glucosidase 33 | chr2:13940233-13943596 FORWARD LENGTH=613	NONE	NONE	NONE
Chr2:14005400-14005699	hyper	15	0	135	0.0334	0.1092	3.2707	AT2G32990	+	protein_coding_gene	Symbols: AtGH9B8, GH9B8 | glycosyl hydrolase 9B8 | chr2:14003361-14005844 FORWARD LENGTH=525	NONE	NONE	NONE
Chr2:14026700-14026899	hyper	8	0	78	0.0125	0.0924	7.4168	AT2G33060	+	protein_coding_gene	Symbols: AtRLP27, RLP27 | receptor like protein 27 | chr2:14025661-14028087 FORWARD LENGTH=808	NONE	NONE	NONE
Chr2:14281750-14281949	hyper	8	1	89	0.0221	0.0644	2.9119	AT2G33770	-	protein_coding_gene	Symbols: UBC24, ATUBC24, PHO2 | phosphate 2 | chr2:14277785-14281482 REVERSE LENGTH=907	NONE	NONE	NONE
Chr2:1431200-1431549	hyper	10	0	123	0.0329	0.1363	4.1372	NONE	NONE	NONE	NONE	AT2TE06580	LINE/L1	NONE
Chr2:1458350-1458549	hyper	8	0	58	0.0351	0.2548	7.2608	NONE	NONE	NONE	NONE	AT2TE06750	RC/Helitron	NONE
Chr2:14775350-14775699	hyper	10	0	171	0.067	0.1226	1.8294	AT2G35060	-	protein_coding_gene	Symbols: KUP11 | K+ uptake permease 11 | chr2:14775184-14778184 REVERSE LENGTH=792	NONE	NONE	NONE
Chr2:147900-148099	hyper	10	0	83	0.0033	0.0794	23.8594	AT2G01280	+	protein_coding_gene	Symbols: MEE65 | Cyclin/Brf1-like TBP-binding protein | chr2:145676-148784 FORWARD LENGTH=548	NONE	NONE	NONE
Chr2:14823500-14823799	hyper	9	1	80	0.0455	0.1332	2.9272	AT2G35160	+	protein_coding_gene	Symbols: SUVH5, SGD9 | SU(VAR)3-9 homolog 5 | chr2:14823562-14825946 FORWARD LENGTH=794	NONE	NONE	NONE
Chr2:14846600-14847099	hyper	29	0	151	0.057	0.2632	4.6159	AT2G35250	-	protein_coding_gene	Symbols: | Protein of Unknown Function (DUF239) | chr2:14846662-14848662 REVERSE LENGTH=342	NONE	NONE	NONE
Chr2:14887400-14887849	hyper	18	0	134	0.029	0.1856	6.3977	NONE	NONE	NONE	NONE	NONE	NONE	AT2G35350-AT2G35360
Chr2:14938950-14939149	hyper	8	0	90	0.0139	0.0504	3.6417	NONE	NONE	NONE	NONE	NONE	NONE	AT2G35585-AT2G35600
Chr2:15130500-15130799	hyper	8	0	53	0.0368	0.2119	5.7607	NONE	NONE	NONE	NONE	AT2TE67330	DNA/MuDR	NONE
Chr2:15140100-15140399	hyper	18	0	118	0.0247	0.1847	7.4826	NONE	NONE	NONE	NONE	NONE	NONE	AT2G36053-AT2G36060
Chr2:1521800-1522049	hyper	10	0	80	0.0467	0.1309	2.8007	NONE	NONE	NONE	NONE	AT2TE06995	RC/Helitron	NONE
Chr2:152200-152749	hyper	18	0	161	0.0611	0.1837	3.0079	AT2G01310	-	protein_coding_gene	Symbols: | BEST Arabidopsis thaliana protein match is: cyclin-dependent protein kinase 3;2 (TAIR:AT1G47210.1); Has 37 Blast hits to 37 proteins in 6 species: Archae - 0; Bacteria - 0; Metazoa - 0; Fungi - 0; Plants - 37; Viruses - 0; Other Eukaryotes - 0 (source: NCBI BLink). | chr2:152481-152642 REVERSE LENGTH=53	AT2TE00535	DNA/MuDR	NONE
Chr2:15236550-15236799	hyper	7	0	98	0	0.1032	10.3211	AT2G36340	+	protein_coding_gene	Symbols: | DNA-binding storekeeper protein-related transcriptional regulator | chr2:15235858-15237489 FORWARD LENGTH=414	NONE	NONE	NONE
Chr2:1525450-1526099	hyper	31	0	272	0.0166	0.0895	5.401	AT2G04378|AT2G04380	-|+	protein_coding_gene|protein_coding_gene	Symbols: | Beta-galactosidase related protein | chr2:1525738-1526169 REVERSE LENGTH=143;Symbols: | unknown protein; Has 2 Blast hits to 2 proteins in 1 species: Archae - 0; Bacteria - 0; Metazoa - 0; Fungi - 0; Plants - 2; Viruses - 0; Other Eukaryotes - 0 (source: NCBI BLink). | chr2:1525642-1526502 FORWARD LENGTH=143	NONE	NONE	NONE
Chr2:15503500-15504049	hyper	21	1	233	0.0109	0.0688	6.3056	AT2G36910	+	protein_coding_gene	Symbols: ATPGP1, PGP1, ABCB1 | ATP binding cassette subfamily B1 | chr2:15502162-15507050 FORWARD LENGTH=1286	NONE	NONE	NONE
Chr2:15504450-15504749	hyper	9	0	113	0.0695	0.1371	1.9727	AT2G36910	+	protein_coding_gene	Symbols: ATPGP1, PGP1, ABCB1 | ATP binding cassette subfamily B1 | chr2:15502162-15507050 FORWARD LENGTH=1286	NONE	NONE	NONE
Chr2:15665800-15666149	hyper	7	0	144	0.0068	0.0301	4.4353	AT2G37310	-	protein_coding_gene	Symbols: | Pentatricopeptide repeat (PPR) superfamily protein | chr2:15665102-15667075 REVERSE LENGTH=657	NONE	NONE	NONE
Chr2:15707500-15707749	hyper	7	0	55	0.0069	0.1051	15.1935	NONE	NONE	NONE	NONE	NONE	NONE	AT2G37430-AT2G37435
Chr2:15815400-15815599	hyper	8	0	97	0.0323	0.0858	2.6586	AT2G37710	-	protein_coding_gene	Symbols: RLK | receptor lectin kinase | chr2:15814934-15816961 REVERSE LENGTH=675	NONE	NONE	NONE
Chr2:15853750-15853949	hyper	8	0	72	0.0287	0.099	3.4431	AT2G37840	+	protein_coding_gene	Symbols: | Protein kinase superfamily protein | chr2:15851978-15856047 FORWARD LENGTH=733	NONE	NONE	NONE
Chr2:15873000-15873349	hyper	13	0	151	0.0552	0.1831	3.317	AT2G37930	+	protein_coding_gene	Symbols: | Protein of unknown function (DUF3527) | chr2:15873284-15874770 FORWARD LENGTH=467	NONE	NONE	NONE
Chr2:15930150-15930699	hyper	17	0	121	0.0236	0.2176	9.2405	AT2G38070	+	protein_coding_gene	Symbols: | Protein of unknown function (DUF740) | chr2:15928737-15930596 FORWARD LENGTH=619	NONE	NONE	NONE
Chr2:1595500-1595749	hyper	10	0	119	0.0641	0.1283	2.0028	AT2G04570	+	protein_coding_gene	Symbols: | GDSL-like Lipase/Acylhydrolase superfamily protein | chr2:1594747-1596129 FORWARD LENGTH=350	NONE	NONE	NONE
Chr2:16194650-16195149	hyper	21	0	214	0.0301	0.0967	3.213	AT2G38740	-	protein_coding_gene	Symbols: | Haloacid dehalogenase-like hydrolase (HAD) superfamily protein | chr2:16194639-16195995 REVERSE LENGTH=244	NONE	NONE	NONE
Chr2:16478800-16478999	hyper	7	0	92	0.0521	0.1328	2.5502	AT2G39480	-	protein_coding_gene	Symbols: PGP6 | P-glycoprotein 6 | chr2:16478249-16484827 REVERSE LENGTH=1407	NONE	NONE	NONE
Chr2:16519300-16519499	hyper	8	0	87	0.0465	0.1109	2.384	AT2G39620	-	protein_coding_gene	Symbols: | Pentatricopeptide repeat (PPR) superfamily protein | chr2:16518968-16521478 REVERSE LENGTH=836	NONE	NONE	NONE
Chr2:16537850-16538049	hyper	7	0	80	0.0495	0.1096	2.2147	NONE	NONE	NONE	NONE	NONE	NONE	AT2G39670-AT2G39690
Chr2:16773200-16773949	hyper	16	0	354	0.0176	0.0524	2.9726	AT2G40140	+	protein_coding_gene	Symbols: CZF1, ZFAR1, SZF2, ATSZF2 | zinc finger (CCCH-type) family protein | chr2:16772537-16774330 FORWARD LENGTH=597	NONE	NONE	NONE
Chr2:16890650-16890999	hyper	9	0	137	0.0064	0.0734	11.4863	AT2G40440	-	protein_coding_gene	Symbols: | BTB/POZ domain-containing protein | chr2:16889212-16891292 REVERSE LENGTH=194	NONE	NONE	NONE
Chr2:16933950-16934249	hyper	7	0	151	0.004	0.0286	7.0984	AT2G40540	+	protein_coding_gene	Symbols: KT2, ATKT2, SHY3, KUP2, ATKUP2, TRK2 | potassium transporter 2 | chr2:16931445-16934516 FORWARD LENGTH=794	NONE	NONE	NONE
Chr2:17072650-17072949	hyper	9	1	126	0.0287	0.0963	3.3515	AT2G40920	-	protein_coding_gene	Symbols: | F-box and associated interaction domains-containing protein | chr2:17072586-17074012 REVERSE LENGTH=436	NONE	NONE	NONE
Chr2:17362550-17363899	hyper	114	0	554	0.093	0.3327	3.5794	AT2G41640	+	protein_coding_gene	Symbols: | Glycosyltransferase family 61 protein | chr2:17360654-17362391 FORWARD LENGTH=500	AT2TE78320	SINE	NONE
Chr2:17497600-17497849	hyper	7	0	105	0.0349	0.0896	2.5647	AT2G41910	+	protein_coding_gene	Symbols: | Protein kinase superfamily protein | chr2:17496956-17498077 FORWARD LENGTH=373	NONE	NONE	NONE
Chr2:17499400-17499749	hyper	24	0	154	0.0339	0.1386	4.0861	AT2G41920	+	protein_coding_gene	Symbols: | Protein kinase superfamily protein | chr2:17499448-17500404 FORWARD LENGTH=318	NONE	NONE	NONE
Chr2:17540150-17540349	hyper	7	2	97	0.0763	0.148	1.9401	AT2G42030	-	protein_coding_gene	Symbols: | RING/U-box superfamily protein | chr2:17539069-17540346 REVERSE LENGTH=425	NONE	NONE	NONE
Chr2:17583800-17584099	hyper	8	0	93	0.0108	0.0803	7.4527	AT2G42190	+	protein_coding_gene	Symbols: | unknown protein; BEST Arabidopsis thaliana protein match is: unknown protein (TAIR:AT3G57930.2); Has 1381 Blast hits to 1230 proteins in 175 species: Archae - 3; Bacteria - 25; Metazoa - 672; Fungi - 135; Plants - 127; Viruses - 30; Other Eukaryotes - 389 (source: NCBI BLink). | chr2:17583625-17584050 FORWARD LENGTH=141	AT2TE79400	DNA/En-Spm	NONE
Chr2:17898050-17898299	hyper	11	0	110	0.0738	0.1532	2.0767	AT2G43040	-	protein_coding_gene	Symbols: NPG1 | tetratricopeptide repeat (TPR)-containing protein | chr2:17896049-17898524 REVERSE LENGTH=704	NONE	NONE	NONE
Chr2:1799850-1800149	hyper	9	0	143	0.0073	0.0419	5.7126	AT2G05070	-	protein_coding_gene	Symbols: LHCB2.2, LHCB2 | photosystem II light harvesting complex gene 2.2 | chr2:1799436-1800329 REVERSE LENGTH=265	NONE	NONE	NONE
Chr2:18178900-18179149	hyper	10	0	120	0.0383	0.1081	2.8194	AT2G43900	-	protein_coding_gene	Symbols: | Endonuclease/exonuclease/phosphatase family protein | chr2:18178801-18183823 REVERSE LENGTH=1316	NONE	NONE	NONE
Chr2:18211000-18211199	hyper	7	0	73	0.0313	0.0944	3.0126	AT2G43980	-	protein_coding_gene	Symbols: AtITPK4, ITPK4 | inositol 1,3,4-trisphosphate 5/6-kinase 4 | chr2:18208437-18211604 REVERSE LENGTH=488	NONE	NONE	NONE
Chr2:1823850-1824199	hyper	10	0	159	0.003	0.0351	11.6554	AT2G05100	-	protein_coding_gene	Symbols: LHCB2.1, LHCB2 | photosystem II light harvesting complex gene 2.1 | chr2:1823449-1824331 REVERSE LENGTH=265	NONE	NONE	NONE
Chr2:187700-188049	hyper	7	0	161	0.0064	0.0392	6.1585	AT2G01430	-	protein_coding_gene	Symbols: ATHB17, ATHB-17, HB17 | homeobox-leucine zipper protein 17 | chr2:187798-190369 REVERSE LENGTH=275	NONE	NONE	NONE
Chr2:18777250-18777799	hyper	17	0	232	0.0039	0.0573	14.6225	AT2G45560	-	protein_coding_gene	Symbols: CYP76C1 | cytochrome P450, family 76, subfamily C, polypeptide 1 | chr2:18776391-18778354 REVERSE LENGTH=512	NONE	NONE	NONE
Chr2:18805850-18806199	hyper	11	0	116	0.0161	0.1016	6.3218	AT2G45650	+	protein_coding_gene	Symbols: AGL6 | AGAMOUS-like 6 | chr2:18804453-18806291 FORWARD LENGTH=252	NONE	NONE	NONE
Chr2:1897750-1897999	hyper	8	0	84	0.0163	0.1749	10.7265	NONE	NONE	NONE	NONE	AT2TE08740	DNA/HAT	NONE
Chr2:19067400-19067749	hyper	9	0	153	0.0435	0.0998	2.2934	AT2G46450	+	protein_coding_gene	Symbols: ATCNGC12, CNGC12 | cyclic nucleotide-gated channel 12 | chr2:19065845-19068364 FORWARD LENGTH=649	NONE	NONE	NONE
Chr2:19085050-19085349	hyper	10	0	134	0.0258	0.0792	3.0752	AT2G46495	-	protein_coding_gene	Symbols: | RING/U-box superfamily protein | chr2:19084134-19085704 REVERSE LENGTH=372	NONE	NONE	NONE
Chr2:19208650-19208949	hyper	7	0	125	0.0366	0.075	2.051	AT2G46750	-	protein_coding_gene	Symbols: | D-arabinono-1,4-lactone oxidase family protein | chr2:19208443-19210909 REVERSE LENGTH=591	NONE	NONE	NONE
Chr2:19213250-19213599	hyper	12	0	145	0.011	0.0876	7.9726	AT2G46760	-	protein_coding_gene	Symbols: | D-arabinono-1,4-lactone oxidase family protein | chr2:19213028-19215166 REVERSE LENGTH=603	NONE	NONE	NONE
Chr2:19280450-19280649	hyper	9	1	100	0.0361	0.0802	2.2232	AT2G46920	-	protein_coding_gene	Symbols: POL | Protein phosphatase 2C family protein | chr2:19278106-19280921 REVERSE LENGTH=856	NONE	NONE	NONE
Chr2:19320100-19320799	hyper	17	2	287	0.0205	0.0687	3.3507	AT2G47020	-	protein_coding_gene	Symbols: | Peptide chain release factor 1 | chr2:19320090-19322279 REVERSE LENGTH=413	NONE	NONE	NONE
Chr2:1945300-1945549	hyper	11	0	91	0.0486	0.1862	3.834	NONE	NONE	NONE	NONE	NONE	NONE	AT2G05335-AT2G05350
Chr2:19577400-19577599	hyper	7	0	77	0.0071	0.0855	12.0765	AT2G47800	+	protein_coding_gene	Symbols: ATMRP4, EST3, MRP4, ABCC4 | multidrug resistance-associated protein 4 | chr2:19574944-19580383 FORWARD LENGTH=1516	NONE	NONE	NONE
Chr2:1965800-1966249	hyper	16	0	141	0.0356	0.1364	3.8305	NONE	NONE	NONE	NONE	AT2TE09070|AT2TE09075	LTR/Gypsy;LTR/Gypsy	NONE
Chr2:1989750-1989999	hyper	8	0	100	0.0339	0.1146	3.3782	NONE	NONE	NONE	NONE	AT2TE09180	LINE/L1	NONE
Chr2:2271000-2271299	hyper	11	0	90	0.0174	0.1251	7.1867	AT2G05920	-	protein_coding_gene	Symbols: | Subtilase family protein | chr2:2269831-2272207 REVERSE LENGTH=754	NONE	NONE	NONE
Chr2:2273550-2274049	hyper	33	0	182	0.0518	0.2139	4.1253	NONE	NONE	NONE	NONE	AT2TE10490	LINE/L1	NONE
Chr2:238750-239049	hyper	11	0	129	0.0402	0.1529	3.802	NONE	NONE	NONE	NONE	NONE	NONE	AT2G01520-AT2G01530
Chr2:240550-240849	hyper	7	0	83	0.0338	0.1936	5.7283	NONE	NONE	NONE	NONE	AT2TE00975|AT2TE00980|AT2TE00985	RC/Helitron;RC/Helitron;RC/Helitron	NONE
Chr2:267450-267799	hyper	14	0	121	0.016	0.1075	6.7211	AT2G01590	+	protein_coding_gene	Symbols: CRR3 | chlororespiratory reduction 3 | chr2:266675-267379 FORWARD LENGTH=174	AT2TE01080	LINE/L1	NONE
Chr2:289300-289549	hyper	9	1	114	0.027	0.092	3.406	NONE	NONE	NONE	NONE	NONE	NONE	AT2G01650-AT2G01660
Chr2:2938950-2939149	hyper	7	0	60	0.0318	0.1373	4.3119	NONE	NONE	NONE	NONE	NONE	NONE	AT2G07050-AT2G07110
Chr2:2974350-2974799	hyper	25	1	169	0.1033	0.2358	2.2814	NONE	NONE	NONE	NONE	NONE	NONE	AT2G07140-AT2G07170
Chr2:3012900-3013149	hyper	8	0	71	0.0489	0.2039	4.1676	NONE	NONE	NONE	NONE	AT2TE13130|AT2TE13135|AT2TE13140	RC/Helitron;DNA/MuDR;DNA/MuDR	NONE
Chr2:307100-307399	hyper	11	0	123	0.0187	0.1127	6.0229	AT2G01680	+	protein_coding_gene	Symbols: | Ankyrin repeat family protein | chr2:306597-308427 FORWARD LENGTH=532	NONE	NONE	NONE
Chr2:3312750-3313049	hyper	8	0	131	0.0407	0.0742	1.8205	NONE	NONE	NONE	NONE	NONE	NONE	AT2G07687-AT2G07689
Chr2:3460900-3461349	hyper	25	0	209	0.0152	0.0359	2.36	NONE	NONE	NONE	NONE	NONE	NONE	AT2G07728-AT2G07732
Chr2:3474700-3475049	hyper	14	0	149	0.013	0.0276	2.1167	AT2G07827	+	protein_coding_gene	Symbols: | unknown protein; FUNCTIONS IN: molecular_function unknown; INVOLVED IN: biological_process unknown; LOCATED IN: cellular_component unknown; Has 1 Blast hits to 1 proteins in 1 species: Archae - 0; Bacteria - 0; Metazoa - 0; Fungi - 0; Plants - 1; Viruses - 0; Other Eukaryotes - 0 (source: NCBI BLink). | chr2:3474996-3476845 FORWARD LENGTH=177	NONE	NONE	NONE
Chr2:3484450-3484799	hyper	12	0	142	0.0189	0.0402	2.1244	AT2G07806	+	protein_coding_gene	Symbols: | unknown protein; FUNCTIONS IN: molecular_function unknown; INVOLVED IN: biological_process unknown; LOCATED IN: cellular_component unknown; Has 1 Blast hits to 1 proteins in 1 species: Archae - 0; Bacteria - 0; Metazoa - 0; Fungi - 0; Plants - 1; Viruses - 0; Other Eukaryotes - 0 (source: NCBI BLink). | chr2:3484830-3489421 FORWARD LENGTH=212	NONE	NONE	NONE
Chr2:4340150-4340499	hyper	13	0	119	0.0275	0.2022	7.3462	NONE	NONE	NONE	NONE	AT2TE18250	RC/Helitron	NONE
Chr2:4341300-4341599	hyper	7	0	122	0.0306	0.0867	2.8311	AT2G11000	-	protein_coding_gene	Symbols: ATMAK10, MAK10 | MAK10 homologue | chr2:4341328-4347768 REVERSE LENGTH=728	NONE	NONE	NONE
Chr2:441250-441549	hyper	12	0	137	0.0432	0.1214	2.811	AT2G01950	-	protein_coding_gene	Symbols: VH1, BRL2 | BRI1-like 2 | chr2:440805-444236 REVERSE LENGTH=1143	NONE	NONE	NONE
Chr2:442150-442449	hyper	13	0	116	0.0626	0.1196	1.909	AT2G01950	-	protein_coding_gene	Symbols: VH1, BRL2 | BRI1-like 2 | chr2:440805-444236 REVERSE LENGTH=1143	NONE	NONE	NONE
Chr2:465150-465499	hyper	8	2	155	0.025	0.0737	2.9456	AT2G01990	-	protein_coding_gene	Symbols: | unknown protein; BEST Arabidopsis thaliana protein match is: unknown protein (TAIR:AT1G14630.1); Has 118 Blast hits to 118 proteins in 14 species: Archae - 0; Bacteria - 0; Metazoa - 0; Fungi - 0; Plants - 118; Viruses - 0; Other Eukaryotes - 0 (source: NCBI BLink). | chr2:465197-466497 REVERSE LENGTH=213	NONE	NONE	NONE
Chr2:4819200-4819399	hyper	24	0	86	0.1628	0.328	2.0153	NONE	NONE	NONE	NONE	AT2TE19995	LTR/Copia	NONE
Chr2:5010700-5011049	hyper	14	0	122	0.0153	0.102	6.6751	AT2G12405	-	protein_coding_gene	Symbols: | unknown protein; FUNCTIONS IN: molecular_function unknown; INVOLVED IN: biological_process unknown; LOCATED IN: endomembrane system; Has 30201 Blast hits to 17322 proteins in 780 species: Archae - 12; Bacteria - 1396; Metazoa - 17338; Fungi - 3422; Plants - 5037; Viruses - 0; Other Eukaryotes - 2996 (source: NCBI BLink). | chr2:5010792-5011590 REVERSE LENGTH=116	AT2TE20545	RC/Helitron	NONE
Chr2:5083150-5083449	hyper	11	0	85	0.0852	0.2517	2.9545	NONE	NONE	NONE	NONE	AT2TE20895	LTR/Gypsy	NONE
Chr2:5215000-5215249	hyper	7	0	86	0.0589	0.1464	2.4858	NONE	NONE	NONE	NONE	AT2TE21310	RC/Helitron	NONE
Chr2:5406200-5406499	hyper	9	0	86	0.0291	0.1473	5.0571	NONE	NONE	NONE	NONE	AT2TE21875	RC/Helitron	NONE
Chr2:5512100-5512449	hyper	12	0	155	0.0518	0.1239	2.3905	AT2G13290	+	protein_coding_gene	Symbols: | beta-1,4-N-acetylglucosaminyltransferase family protein | chr2:5512058-5513143 FORWARD LENGTH=361	NONE	NONE	NONE
Chr2:5791450-5791849	hyper	23	0	134	0.0373	0.2336	6.2666	NONE	NONE	NONE	NONE	NONE	NONE	AT2G13840-AT2G13895
Chr2:5840250-5840599	hyper	10	0	138	0.0048	0.0268	5.5447	NONE	NONE	NONE	NONE	NONE	NONE	AT2G13900-AT2G13950
Chr2:585900-586199	hyper	10	0	128	0.0146	0.0607	4.1504	AT2G02220	-	protein_coding_gene	Symbols: ATPSKR1, PSKR1 | phytosulfokin receptor 1 | chr2:584098-587124 REVERSE LENGTH=1008	NONE	NONE	NONE
Chr2:5959250-5959549	hyper	7	0	118	0.0153	0.0678	4.4192	AT2G14120	-	protein_coding_gene	Symbols: DRP3B | dynamin related protein | chr2:5954253-5960015 REVERSE LENGTH=780	NONE	NONE	NONE
Chr2:6043150-6043349	hyper	7	0	86	0.0721	0.1531	2.1233	AT2G14260	-	protein_coding_gene	Symbols: PIP | proline iminopeptidase | chr2:6041441-6043869 REVERSE LENGTH=380	NONE	NONE	NONE
Chr2:6105500-6105699	hyper	10	0	76	0.1112	0.2321	2.0869	NONE	NONE	NONE	NONE	AT2TE24845|AT2TE24850	DNA/MuDR;LTR/Gypsy	NONE
Chr2:6186000-6186299	hyper	9	2	106	0.0761	0.164	2.1539	NONE	NONE	NONE	NONE	NONE	NONE	AT2G14520-AT2G14530
Chr2:6186800-6187149	hyper	15	0	128	0.0698	0.1984	2.8402	NONE	NONE	NONE	NONE	NONE	NONE	AT2G14520-AT2G14530
Chr2:6316800-6317399	hyper	56	1	246	0.0939	0.2751	2.9306	NONE	NONE	NONE	NONE	NONE	NONE	AT2G14750-AT2G14760
Chr2:6354000-6354299	hyper	9	0	101	0.0209	0.146	6.9963	NONE	NONE	NONE	NONE	NONE	NONE	AT2G14760-AT2G14800
Chr2:638050-638299	hyper	8	0	79	0.007	0.1572	22.6069	AT2G02440	+	protein_coding_gene	Symbols: | unknown protein; Has 3 Blast hits to 3 proteins in 2 species: Archae - 0; Bacteria - 0; Metazoa - 0; Fungi - 0; Plants - 3; Viruses - 0; Other Eukaryotes - 0 (source: NCBI BLink). | chr2:638012-639305 FORWARD LENGTH=138	NONE	NONE	NONE
Chr2:6391050-6391249	hyper	8	0	54	0.0309	0.1983	6.4204	AT2G14870	+	protein_coding_gene	Symbols: | RNA-binding (RRM/RBD/RNP motifs) family protein | chr2:6391172-6391477 FORWARD LENGTH=101	NONE	NONE	NONE
Chr2:6507600-6507899	hyper	11	0	128	0.0584	0.1277	2.1851	NONE	NONE	NONE	NONE	NONE	NONE	AT2G15029-AT2G15042
Chr2:6546950-6547249	hyper	8	0	89	0.0618	0.1834	2.9688	NONE	NONE	NONE	NONE	NONE	NONE	AT2G15090-AT2G15110
Chr2:677000-677299	hyper	8	0	117	0.0643	0.1537	2.3919	AT2G02520	-	protein_coding_gene	Symbols: | RNA-directed DNA polymerase (reverse transcriptase)-related family protein | chr2:676771-678145 REVERSE LENGTH=211	NONE	NONE	NONE
Chr2:6830150-6830649	hyper	25	0	155	0.0741	0.2273	3.0682	NONE	NONE	NONE	NONE	NONE	NONE	AT2G15680-AT2G15690
Chr2:6890400-6890699	hyper	9	1	110	0.0406	0.0977	2.4082	AT2G15820	-	protein_coding_gene	Symbols: OTP51 | endonucleases | chr2:6888734-6891360 REVERSE LENGTH=849	NONE	NONE	NONE
Chr2:6962250-6962499	hyper	11	0	66	0.1044	0.2274	2.177	NONE	NONE	NONE	NONE	AT2TE28345	DNA	NONE
Chr2:6963550-6963749	hyper	8	0	71	0.0064	0.0919	14.3894	NONE	NONE	NONE	NONE	AT2TE28345	DNA	NONE
Chr2:7454650-7454899	hyper	7	0	77	0	0.2238	22.3833	NONE	NONE	NONE	NONE	AT2TE30565|AT2TE30570|AT2TE30575	RC/Helitron;RC/Helitron;RC/Helitron	NONE
Chr2:7537300-7537599	hyper	18	0	122	0.1146	0.272	2.373	NONE	NONE	NONE	NONE	NONE	NONE	AT2G17320-AT2G17340
Chr2:7690500-7690699	hyper	9	0	64	0.06	0.2038	3.3964	NONE	NONE	NONE	NONE	NONE	NONE	AT2G17700-AT2G17705
Chr2:7692850-7693199	hyper	7	0	133	0.007	0.0468	6.6657	AT2G17705	+	protein_coding_gene	Symbols: | unknown protein; FUNCTIONS IN: molecular_function unknown; INVOLVED IN: biological_process unknown; LOCATED IN: plasma membrane; EXPRESSED IN: cultured cell; BEST Arabidopsis thaliana protein match is: unknown protein (TAIR:AT4G08330.1); Has 135 Blast hits to 135 proteins in 32 species: Archae - 5; Bacteria - 29; Metazoa - 0; Fungi - 0; Plants - 91; Viruses - 0; Other Eukaryotes - 10 (…	NONE	NONE	NONE
Chr2:770850-771149	hyper	9	0	129	0.0395	0.0932	2.3577	AT2G02740	+	protein_coding_gene	Symbols: ATWHY3, PTAC11, WHY3 | ssDNA-binding transcriptional regulator | chr2:769389-770993 FORWARD LENGTH=268	NONE	NONE	NONE
Chr2:7721350-7721549	hyper	8	0	64	0.0058	0.3197	55.3055	NONE	NONE	NONE	NONE	NONE	NONE	AT2G17760-AT2G17770
Chr2:7860850-7861149	hyper	10	0	106	0.0351	0.0956	2.7248	NONE	NONE	NONE	NONE	AT2TE32530|AT2TE32535	RC/Helitron;DNA/Pogo	NONE
Chr2:7968250-7968599	hyper	13	0	152	0.0284	0.0978	3.4368	AT2G18330	+	protein_coding_gene	Symbols: | AAA-type ATPase family protein | chr2:7965829-7968915 FORWARD LENGTH=636	NONE	NONE	NONE
Chr2:8032350-8032599	hyper	8	0	89	0.0112	0.0849	7.6026	AT2G18510	-	protein_coding_gene	Symbols: emb2444 | RNA-binding (RRM/RBD/RNP motifs) family protein | chr2:8031554-8033517 REVERSE LENGTH=363	NONE	NONE	NONE
Chr2:8041450-8041799	hyper	13	0	108	0.0343	0.1808	5.2787	NONE	NONE	NONE	NONE	NONE	NONE	AT2G18530-AT2G18540
Chr2:8193250-8193549	hyper	9	0	102	0.019	0.0765	4.0334	AT2G18910	-	protein_coding_gene	Symbols: | hydroxyproline-rich glycoprotein family protein | chr2:8193016-8194131 REVERSE LENGTH=131	NONE	NONE	NONE
Chr2:8407400-8407749	hyper	15	0	125	0.0806	0.2005	2.4873	AT2G19410	-	protein_coding_gene	Symbols: | U-box domain-containing protein kinase family protein | chr2:8404901-8409012 REVERSE LENGTH=801	NONE	NONE	NONE
Chr2:8499300-8499649	hyper	10	0	150	0.0116	0.0583	5.0253	AT2G19670	-	protein_coding_gene	Symbols: ATPRMT1A, PRMT1A | protein arginine methyltransferase 1A | chr2:8499278-8501114 REVERSE LENGTH=366	NONE	NONE	NONE
Chr2:8643750-8643999	hyper	10	0	75	0.1384	0.3026	2.1859	NONE	NONE	NONE	NONE	NONE	NONE	AT2G20010-AT2G20020
Chr2:8894200-8894549	hyper	14	0	98	0.0598	0.2323	3.8836	NONE	NONE	NONE	NONE	AT2TE37435	RC/Helitron	NONE
Chr2:9045950-9046249	hyper	8	1	145	0.0534	0.1122	2.1022	AT2G21090	-	protein_coding_gene	Symbols: | Pentatricopeptide repeat (PPR-like) superfamily protein | chr2:9045695-9047488 REVERSE LENGTH=597	NONE	NONE	NONE
Chr2:9537300-9537599	hyper	12	0	119	0.1064	0.2539	2.3867	NONE	NONE	NONE	NONE	AT2TE40590	LINE?	NONE
Chr2:9729750-9729999	hyper	10	0	124	0.0675	0.139	2.0597	AT2G22840	+	protein_coding_gene	Symbols: AtGRF1, GRF1 | growth-regulating factor 1 | chr2:9728841-9731141 FORWARD LENGTH=530	NONE	NONE	NONE
Chr2:984200-984499	hyper	9	0	115	0.0623	0.1477	2.3699	AT2G03250	-	protein_coding_gene	Symbols: | EXS (ERD1/XPR1/SYG1) family protein | chr2:982173-986662 REVERSE LENGTH=756	NONE	NONE	NONE
Chr2:9878000-9878299	hyper	9	0	110	0.01	0.069	6.9232	AT2G23190	+	protein_coding_gene	Symbols: CYP81D7 | cytochrome P450, family 81, subfamily D, polypeptide 7 | chr2:9877058-9879007 FORWARD LENGTH=543	NONE	NONE	NONE
Chr2:9880800-9881149	hyper	13	0	157	0.0604	0.1355	2.2416	AT2G23200	+	protein_coding_gene	Symbols: | Protein kinase superfamily protein | chr2:9879351-9881855 FORWARD LENGTH=834	NONE	NONE	NONE
Chr2:9947450-9947799	hyper	8	0	105	0.0658	0.1671	2.5389	NONE	NONE	NONE	NONE	NONE	NONE	AT2G23350-AT2G23360
Chr3:10010700-10011049	hyper	7	1	156	0.0344	0.0766	2.2291	AT3G27150	-	protein_coding_gene	Symbols: | Galactose oxidase/kelch repeat superfamily protein | chr3:10009692-10010960 REVERSE LENGTH=422	NONE	NONE	NONE
Chr3:10054600-10054899	hyper	7	0	128	0.0057	0.0513	8.9724	AT3G27230	+	protein_coding_gene	Symbols: | S-adenosyl-L-methionine-dependent methyltransferases superfamily protein | chr3:10054224-10055456 FORWARD LENGTH=410	NONE	NONE	NONE
Chr3:10211500-10211849	hyper	12	0	141	0.0301	0.0973	3.2309	AT3G27560	-	protein_coding_gene	Symbols: ATN1 | Protein kinase superfamily protein | chr3:10210597-10212507 REVERSE LENGTH=356	NONE	NONE	NONE
Chr3:10445900-10446199	hyper	8	0	134	0.0038	0.0436	11.4885	AT3G28060	+	protein_coding_gene	Symbols: | Nodulin MtN21 /EamA-like transporter family protein | chr3:10445860-10446846 FORWARD LENGTH=215	NONE	NONE	NONE
Chr3:10555700-10555899	hyper	7	0	62	0.0227	0.2097	9.2269	NONE	NONE	NONE	NONE	AT3TE43875	RC/Helitron	NONE
Chr3:10573950-10574249	hyper	8	0	38	0.0634	0.2552	4.0268	NONE	NONE	NONE	NONE	AT3TE43985|AT3TE43990	RC/Helitron;RC/Helitron	NONE
Chr3:10634450-10634799	hyper	12	0	138	0.0329	0.0831	2.5288	NONE	NONE	NONE	NONE	NONE	NONE	AT3G28390-AT3G28410
Chr3:10749050-10749249	hyper	8	0	80	0.0235	0.1901	8.0944	AT3G28680	-	protein_coding_gene	Symbols: | Serine carboxypeptidase S28 family protein | chr3:10748751-10749733 REVERSE LENGTH=199	NONE	NONE	NONE
Chr3:10777300-10777749	hyper	24	0	132	0.034	0.206	6.058	NONE	NONE	NONE	NONE	AT3TE44815|AT3TE44820	RC/Helitron;LTR/Gypsy	NONE
Chr3:10807600-10807799	hyper	7	0	81	0.0804	0.1731	2.1543	AT3G28780	-	protein_coding_gene	Symbols: | Protein of unknown function (DUF1216) | chr3:10806131-10808369 REVERSE LENGTH=674	NONE	NONE	NONE
Chr3:10809050-10809399	hyper	9	1	132	0.041	0.1139	2.781	NONE	NONE	NONE	NONE	NONE	NONE	AT3G28780-AT3G28790
Chr3:11043600-11043899	hyper	8	0	95	0.027	0.1076	3.9869	NONE	NONE	NONE	NONE	NONE	NONE	AT3G29050-AT3G29060
Chr3:11076300-11076499	hyper	7	0	82	0.0136	0.0871	6.3952	AT3G29100	-	protein_coding_gene	Symbols: VTI13, ATVTI13 | vesicle transport V-snare 13 | chr3:11075916-11076581 REVERSE LENGTH=195	NONE	NONE	NONE
Chr3:11101000-11101349	hyper	11	0	143	0.0229	0.1529	6.6833	NONE	NONE	NONE	NONE	AT3TE46185|AT3TE46190|AT3TE46195	LINE/L1;LTR/Gypsy;LTR/Gypsy	NONE
Chr3:11198850-11199049	hyper	8	0	71	0.002	0.1318	64.5647	NONE	NONE	NONE	NONE	NONE	NONE	AT3G29250-AT3G29255
Chr3:11203400-11203699	hyper	9	0	103	0.0388	0.1612	4.1536	NONE	NONE	NONE	NONE	NONE	NONE	AT3G29250-AT3G29255
Chr3:11344500-11344849	hyper	12	1	135	0.0612	0.1735	2.833	NONE	NONE	NONE	NONE	AT3TE47240	LINE/L1	NONE
Chr3:11359900-11360099	hyper	7	0	80	0.047	0.1726	3.6759	AT3G29560	-	protein_coding_gene	Symbols: | unknown protein; Has 0 Blast hits to 0 proteins in 0 species (source: NCBI BLink). | chr3:11359512-11360208 REVERSE LENGTH=120	NONE	NONE	NONE
Chr3:11466100-11466399	hyper	8	0	131	0.0025	0.0356	14.4313	AT3G29635	-	protein_coding_gene	Symbols: | HXXXD-type acyl-transferase family protein | chr3:11465851-11467227 REVERSE LENGTH=458	NONE	NONE	NONE
Chr3:11468650-11468849	hyper	7	0	95	0.0163	0.0566	3.466	AT3G29636	-	protein_coding_gene	Symbols: | transferase-related | chr3:11467964-11468857 REVERSE LENGTH=199	NONE	NONE	NONE
Chr3:11657100-11657299	hyper	7	0	89	0.0608	0.1318	2.1677	NONE	NONE	NONE	NONE	AT3TE48455|AT3TE48460	LINE/L1;LTR/Copia	NONE
Chr3:11717550-11717949	hyper	19	0	141	0.0111	0.1632	14.7647	AT3G29797	+	protein_coding_gene	Symbols: | Protein of unknown function (DUF784) | chr3:11717613-11718083 FORWARD LENGTH=156	AT3TE48800	RC/Helitron	NONE
Chr3:11720750-11720999	hyper	10	0	91	0.0411	0.085	2.0673	AT3G29800	+	protein_coding_gene	Symbols: | P-loop containing nucleoside triphosphate hydrolases superfamily protein | chr3:11720096-11722103 FORWARD LENGTH=440	NONE	NONE	NONE
Chr3:11728900-11729099	hyper	8	1	94	0.0633	0.1327	2.0973	AT3G29810	+	protein_coding_gene	Symbols: COBL2 | COBRA-like protein 2 precursor | chr3:11728212-11730158 FORWARD LENGTH=441	NONE	NONE	NONE
Chr3:11760900-11761249	hyper	18	1	119	0.0899	0.2364	2.6289	NONE	NONE	NONE	NONE	AT3TE48970|AT3TE48975	RC/Helitron;RC/Helitron	NONE
Chr3:11808950-11809249	hyper	9	0	56	0.1006	0.2023	2.0107	NONE	NONE	NONE	NONE	AT3TE49140|AT3TE49145	RC/Helitron;RC/Helitron	NONE
Chr3:11864850-11865099	hyper	7	0	93	0.0292	0.1142	3.9128	NONE	NONE	NONE	NONE	NONE	NONE	AT3G30210-AT3G30220
Chr3:11923100-11923299	hyper	7	1	73	0.0778	0.1808	2.3233	AT3G30300	-	protein_coding_gene	Symbols: | O-fucosyltransferase family protein | chr3:11921390-11924254 REVERSE LENGTH=677	NONE	NONE	NONE
Chr3:12095500-12095999	hyper	19	0	161	0.0267	0.1935	7.2575	NONE	NONE	NONE	NONE	AT3TE50320	DNA/HAT	NONE
Chr3:1210350-1210899	hyper	47	0	217	0.0148	0.2036	13.7758	NONE	NONE	NONE	NONE	NONE	NONE	AT3G04490-AT3G04500
Chr3:12349100-12349449	hyper	12	0	127	0.0783	0.1989	2.5413	AT3G30720	+	protein_coding_gene	Symbols: QQS | qua-quine starch | chr3:12349461-12349726 FORWARD LENGTH=59	AT3TE51150	DNA/En-Spm	NONE
Chr3:1274500-1274749	hyper	8	0	115	0.061	0.1234	2.0246	AT3G04690	-	protein_coding_gene	Symbols: ANX1 | Malectin/receptor-like protein kinase family protein | chr3:1273386-1275938 REVERSE LENGTH=850	NONE	NONE	NONE
Chr3:1327750-1327949	hyper	8	0	83	0.0107	0.0723	6.7521	AT3G04830	+	protein_coding_gene	Symbols: | Protein prenylyltransferase superfamily protein | chr3:1326289-1329132 FORWARD LENGTH=303	NONE	NONE	NONE
Chr3:13540450-13540699	hyper	7	0	83	0.0849	0.1712	2.0164	NONE	NONE	NONE	NONE	NONE	NONE	AT3G32980-AT3G33187
Chr3:13842150-13842499	hyper	7	0	134	0.0055	0.0512	9.3142	NONE	NONE	NONE	NONE	NONE	NONE	AT3G32980-AT3G33187
Chr3:14197650-14197849	hyper	9	0	82	0.0355	0.1416	3.991	NONE	NONE	NONE	NONE	NONE	NONE	AT3G41762-AT3G42050
Chr3:14273400-14274299	hyper	50	0	326	0.0368	0.208	5.6521	NONE	NONE	NONE	NONE	AT3TE58655	RC/Helitron	NONE
Chr3:14315400-14315899	hyper	26	0	166	0.0925	0.2083	2.253	AT3G42160	+	protein_coding_gene	Symbols: | Pectin lyase-like superfamily protein | chr3:14314583-14315634 FORWARD LENGTH=153	AT3TE58810	RC/Helitron	NONE
Chr3:14468550-14468749	hyper	7	1	40	0.117	0.2506	2.1417	NONE	NONE	NONE	NONE	NONE	NONE	AT3G42310-AT3G42380
Chr3:14604250-14604449	hyper	7	0	52	0.1076	0.2566	2.3846	NONE	NONE	NONE	NONE	NONE	NONE	AT3G42390-AT3G42473
Chr3:14738100-14738299	hyper	7	0	85	0.0761	0.2299	3.0224	NONE	NONE	NONE	NONE	NONE	NONE	AT3G42640-AT3G42660
Chr3:14761800-14762399	hyper	20	0	81	0.0876	0.3524	4.0236	NONE	NONE	NONE	NONE	AT3TE60370	LTR/Copia	NONE
Chr3:14843350-14843649	hyper	8	0	107	0.0315	0.1196	3.7941	AT3G42725	-	protein_coding_gene	Symbols: | Putative membrane lipoprotein | chr3:14843082-14843690 REVERSE LENGTH=202	NONE	NONE	NONE
Chr3:15196050-15196249	hyper	7	1	69	0.0149	0.0884	5.9492	AT3G43210	+	protein_coding_gene	Symbols: TES, ATNACK2, NACK2 | ATP binding microtubule motor family protein | chr3:15191429-15196021 FORWARD LENGTH=938	NONE	NONE	NONE
Chr3:15222800-15223049	hyper	10	0	120	0.0359	0.0985	2.7422	AT3G43270	-	protein_coding_gene	Symbols: | Plant invertase/pectin methylesterase inhibitor superfamily | chr3:15222402-15225124 REVERSE LENGTH=527	NONE	NONE	NONE
Chr3:15501100-15501349	hyper	12	0	102	0.1682	0.3257	1.9359	NONE	NONE	NONE	NONE	NONE	NONE	AT3G43574-AT3G43580
Chr3:15540200-15540399	hyper	7	0	68	0.0957	0.1964	2.0514	NONE	NONE	NONE	NONE	NONE	NONE	AT3G43630-AT3G43660
Chr3:15794000-15794199	hyper	7	0	70	0.0433	0.1717	3.9632	NONE	NONE	NONE	NONE	NONE	NONE	AT3G43990-AT3G44006
Chr3:15872050-15872299	hyper	10	0	90	0.1068	0.2408	2.255	NONE	NONE	NONE	NONE	NONE	NONE	AT3G44110-AT3G44115
Chr3:15965150-15965399	hyper	8	0	74	0.0659	0.1845	2.8	NONE	NONE	NONE	NONE	NONE	NONE	AT3G44261-AT3G44280
Chr3:15976450-15976799	hyper	13	0	87	0.0676	0.2258	3.3382	NONE	NONE	NONE	NONE	AT3TE64665|AT3TE64670|AT3TE64675	DNA/Pogo;RC/Helitron;RC/Helitron	NONE
Chr3:16078850-16079049	hyper	7	0	85	0.0416	0.1374	3.305	NONE	NONE	NONE	NONE	AT3TE65065	LTR/Copia	NONE
Chr3:16082700-16083049	hyper	13	0	97	0.0182	0.2149	11.8169	NONE	NONE	NONE	NONE	NONE	NONE	AT3G44460-AT3G44480
Chr3:16538000-16538249	hyper	12	1	98	0.048	0.1337	2.7862	AT3G45170	+	protein_coding_gene	Symbols: GATA14 | GATA transcription factor 14 | chr3:16537538-16538232 FORWARD LENGTH=204	NONE	NONE	NONE
Chr3:16564150-16564449	hyper	7	0	84	0.0115	0.091	7.9005	NONE	NONE	NONE	NONE	NONE	NONE	AT3G45210-AT3G45220
Chr3:16595950-16596349	hyper	21	0	141	0.0929	0.2339	2.5169	NONE	NONE	NONE	NONE	AT3TE67310	LINE/L1	NONE
Chr3:16660850-16661049	hyper	7	0	91	0.0028	0.0485	17.4261	AT3G45430	-	protein_coding_gene	Symbols: | Concanavalin A-like lectin protein kinase family protein | chr3:16660759-16662783 REVERSE LENGTH=674	NONE	NONE	NONE
Chr3:16900300-16900649	hyper	11	0	124	0.0887	0.2322	2.6171	NONE	NONE	NONE	NONE	NONE	NONE	AT3G45980-AT3G45990
Chr3:16900800-16901199	hyper	21	0	145	0.0833	0.2261	2.7146	AT3G45990	-	protein_coding_gene	Symbols: | Cofilin/tropomyosin-type actin-binding protein family | chr3:16900778-16904136 REVERSE LENGTH=133	AT3TE68470	RC/Helitron	NONE
Chr3:1692600-1692899	hyper	17	0	85	0.1714	0.3114	1.8167	AT3G05725	+	protein_coding_gene	Symbols: | Protein of unknown function (DUF3511) | chr3:1692548-1693153 FORWARD LENGTH=124	NONE	NONE	NONE
Chr3:16943300-16943549	hyper	7	0	68	0.0784	0.1663	2.1202	NONE	NONE	NONE	NONE	NONE	NONE	AT3G46120-AT3G46130
Chr3:17148800-17149049	hyper	8	0	104	0.0444	0.0951	2.1429	AT3G46580	+	protein_coding_gene	Symbols: MBD05, MBD5, ATMBD5 | methyl-CPG-binding domain protein 5 | chr3:17148397-17149328 FORWARD LENGTH=182	AT3TE69475	RC/Helitron	NONE
Chr3:17273050-17273249	hyper	7	0	84	0.0473	0.1616	3.4186	NONE	NONE	NONE	NONE	NONE	NONE	AT3G46901-AT3G46904
Chr3:17335500-17335699	hyper	7	0	87	0.0334	0.0998	2.9895	AT3G47060	+	protein_coding_gene	Symbols: ftsh7 | FTSH protease 7 | chr3:17332999-17336613 FORWARD LENGTH=802	NONE	NONE	NONE
Chr3:17336100-17336449	hyper	8	0	132	0.0097	0.0538	5.5364	AT3G47060	+	protein_coding_gene	Symbols: ftsh7 | FTSH protease 7 | chr3:17332999-17336613 FORWARD LENGTH=802	NONE	NONE	NONE
Chr3:17399900-17400249	hyper	11	0	128	0.0074	0.1032	13.92	AT3G47250	-	protein_coding_gene	Symbols: | Plant protein of unknown function (DUF247) | chr3:17400124-17401566 REVERSE LENGTH=480	AT3TE70570	RC/Helitron	NONE
Chr3:17472550-17472899	hyper	17	2	179	0.0639	0.1352	2.1143	AT3G47420	-	protein_coding_gene	Symbols: ATPS3, PS3 | phosphate starvation-induced gene 3 | chr3:17472541-17474209 REVERSE LENGTH=523	NONE	NONE	NONE
Chr3:17504400-17505099	hyper	15	0	349	0.0073	0.0329	4.5319	AT3G47500	-	protein_coding_gene	Symbols: CDF3 | cycling DOF factor 3 | chr3:17504276-17505964 REVERSE LENGTH=448	NONE	NONE	NONE
Chr3:17607950-17608249	hyper	10	0	116	0.0122	0.0749	6.1376	AT3G47750	+	protein_coding_gene	Symbols: ATATH3, ABCA4 | ATP binding cassette subfamily A4 | chr3:17606427-17610889 FORWARD LENGTH=947	NONE	NONE	NONE
Chr3:17612150-17612449	hyper	9	1	123	0.0534	0.1003	1.8781	AT3G47760	+	protein_coding_gene	Symbols: ATATH4, ATH4, ABCA5 | ABC2 homolog 4 | chr3:17611787-17616639 FORWARD LENGTH=872	NONE	NONE	NONE
Chr3:17647700-17647899	hyper	7	0	85	0.0456	0.1033	2.2667	AT3G47830	+	protein_coding_gene	Symbols: | DNA glycosylase superfamily protein | chr3:17647069-17648346 FORWARD LENGTH=293	NONE	NONE	NONE
Chr3:17673950-17674249	hyper	8	0	132	0.0103	0.0595	5.772	NONE	NONE	NONE	NONE	NONE	NONE	AT3G47890-AT3G47910
Chr3:17865900-17866149	hyper	13	0	101	0.0661	0.1675	2.533	NONE	NONE	NONE	NONE	AT3TE72370	Unassigned	NONE
Chr3:18270650-18270949	hyper	7	0	112	0.0217	0.0866	3.9891	NONE	NONE	NONE	NONE	AT3TE74115	LINE/L1	NONE
Chr3:18419850-18420049	hyper	10	0	100	0.0114	0.0541	4.7447	AT3G49670	+	protein_coding_gene	Symbols: BAM2 | Leucine-rich receptor-like protein kinase family protein | chr3:18417741-18420836 FORWARD LENGTH=1002	NONE	NONE	NONE
Chr3:18467100-18467399	hyper	7	0	117	0.0217	0.0612	2.8156	NONE	NONE	NONE	NONE	NONE	NONE	AT3G49780-AT3G49790
Chr3:18475000-18475249	hyper	8	0	120	0.045	0.088	1.9566	AT3G49810	-	protein_coding_gene	Symbols: | ARM repeat superfamily protein | chr3:18474936-18476282 REVERSE LENGTH=448	NONE	NONE	NONE
Chr3:18500750-18501299	hyper	39	2	276	0.0338	0.1332	3.945	AT3G49900	-	protein_coding_gene	Symbols: | Phototropic-responsive NPH3 family protein | chr3:18500635-18502614 REVERSE LENGTH=517	NONE	NONE	NONE
Chr3:18545350-18545799	hyper	19	0	141	0.0604	0.1653	2.7371	NONE	NONE	NONE	NONE	AT3TE75240	RC/Helitron	NONE
Chr3:1861900-1862599	hyper	33	0	324	0.0468	0.1157	2.4733	AT3G06150	-	protein_coding_gene	Symbols: | unknown protein; BEST Arabidopsis thaliana protein match is: unknown protein (TAIR:AT5G19060.1); Has 61 Blast hits to 59 proteins in 10 species: Archae - 0; Bacteria - 0; Metazoa - 3; Fungi - 0; Plants - 58; Viruses - 0; Other Eukaryotes - 0 (source: NCBI BLink). | chr3:1861971-1863755 REVERSE LENGTH=594	NONE	NONE	NONE
Chr3:18887500-18887749	hyper	8	0	57	0.1625	0.3361	2.0676	AT3G50808	-	protein_coding_gene	Symbols: | PLATZ transcription factor family protein | chr3:18887614-18888047 REVERSE LENGTH=110	AT3TE76580	RC/Helitron	NONE
Chr3:19284800-19285099	hyper	7	2	153	0.0228	0.0505	2.215	AT3G51970	+	protein_coding_gene	Symbols: ATSAT1, ASAT1, ATASAT1 | acyl-CoA sterol acyl transferase 1 | chr3:19284420-19285457 FORWARD LENGTH=345	NONE	NONE	NONE
Chr3:19298700-19299049	hyper	13	0	93	0.0258	0.2841	11.0241	NONE	NONE	NONE	NONE	NONE	NONE	AT3G52010-AT3G52020
Chr3:19609200-19609549	hyper	9	0	154	0.0105	0.0535	5.0756	AT3G52890	+	protein_coding_gene	Symbols: KIPK | KCBP-interacting protein kinase | chr3:19609150-19612032 FORWARD LENGTH=934	NONE	NONE	NONE
Chr3:19764750-19765049	hyper	12	0	130	0.0881	0.1712	1.9438	AT3G53305	+	protein_coding_gene	Symbols: CYP71B32 | cytochrome P450, family 71, subfamily B, polypeptide 32 | chr3:19763618-19765268 FORWARD LENGTH=338	NONE	NONE	NONE
Chr3:19770150-19770499	hyper	12	0	132	0.0197	0.0844	4.2803	AT3G53320	-	protein_coding_gene	Symbols: | unknown protein; BEST Arabidopsis thaliana protein match is: unknown protein (TAIR:AT2G37070.1); Has 11044 Blast hits to 5993 proteins in 551 species: Archae - 8; Bacteria - 1486; Metazoa - 4078; Fungi - 1814; Plants - 348; Viruses - 112; Other Eukaryotes - 3198 (source: NCBI BLink). | chr3:19769397-19772278 REVERSE LENGTH=553	NONE	NONE	NONE
Chr3:19952600-19952849	hyper	7	0	117	0.0026	0.0434	16.959	AT3G53870	+	protein_coding_gene	Symbols: | Ribosomal protein S3 family protein | chr3:19951547-19952782 FORWARD LENGTH=249	NONE	NONE	NONE
Chr3:20521450-20521649	hyper	8	0	93	0.0205	0.0682	3.3225	AT3G55360	-	protein_coding_gene	Symbols: CER10, ECR, ATTSC13, TSC13 | 3-oxo-5-alpha-steroid 4-dehydrogenase family protein | chr3:20521186-20522856 REVERSE LENGTH=310	NONE	NONE	NONE
Chr3:20549850-20550349	hyper	26	2	266	0.0342	0.0992	2.8985	AT3G55430	-	protein_coding_gene	Symbols: | O-Glycosyl hydrolases family 17 protein | chr3:20549806-20552004 REVERSE LENGTH=449	NONE	NONE	NONE
Chr3:20658700-20658899	hyper	10	0	73	0.1079	0.2394	2.2179	AT3G55670	-	protein_coding_gene	Symbols: | CONTAINS InterPro DOMAIN/s: FBD (InterPro:IPR013596), FBD-like (InterPro:IPR006566); BEST Arabidopsis thaliana protein match is: F-box/RNI-like/FBD-like domains-containing protein (TAIR:AT3G52680.2); Has 400 Blast hits to 249 proteins in 3 species: Archae - 0; Bacteria - 0; Metazoa - 0; Fungi - 0; Plants - 400; Viruses - 0; Other Eukaryotes - 0 (source: NCBI BLink). | chr3:20658013-206…	NONE	NONE	NONE
Chr3:20685850-20686199	hyper	10	0	120	0.0669	0.2248	3.361	NONE	NONE	NONE	NONE	NONE	NONE	AT3G55730-AT3G55740
Chr3:20696450-20696799	hyper	11	0	139	0.0291	0.1049	3.6051	AT3G55740	+	protein_coding_gene	Symbols: PROT2, ATPROT2 | proline transporter 2 | chr3:20695786-20698157 FORWARD LENGTH=439	NONE	NONE	NONE
Chr3:20728550-20729049	hyper	46	0	165	0.1257	0.409	3.253	AT3G55860	-	protein_coding_gene	Symbols: | unknown protein; BEST Arabidopsis thaliana protein match is: unknown protein (TAIR:AT3G60660.1); Has 30201 Blast hits to 17322 proteins in 780 species: Archae - 12; Bacteria - 1396; Metazoa - 17338; Fungi - 3422; Plants - 5037; Viruses - 0; Other Eukaryotes - 2996 (source: NCBI BLink). | chr3:20727836-20728962 REVERSE LENGTH=154	NONE	NONE	NONE
Chr3:20853400-20853799	hyper	15	0	120	0.04	0.1991	4.9816	AT3G56210	-	protein_coding_gene	Symbols: | ARM repeat superfamily protein | chr3:20853995-20855445 REVERSE LENGTH=191	NONE	NONE	NONE
Chr3:21077700-21078049	hyper	11	0	143	0.0116	0.0741	6.4009	AT3G56940	+	protein_coding_gene	Symbols: CRD1, CHL27, ACSF | dicarboxylate diiron protein, putative (Crd1) | chr3:21076594-21078269 FORWARD LENGTH=409	NONE	NONE	NONE
Chr3:21171350-21171599	hyper	10	0	101	0.0253	0.0786	3.1033	AT3G57200	+	protein_coding_gene	Symbols: | unknown protein; BEST Arabidopsis thaliana protein match is: unknown protein (TAIR:AT2G41451.1); Has 94 Blast hits to 94 proteins in 31 species: Archae - 0; Bacteria - 12; Metazoa - 0; Fungi - 0; Plants - 77; Viruses - 0; Other Eukaryotes - 5 (source: NCBI BLink). | chr3:21169413-21172103 FORWARD LENGTH=514	NONE	NONE	NONE
Chr3:21254250-21254549	hyper	9	0	128	0.0198	0.1218	6.1453	AT3G57420	-	protein_coding_gene	Symbols: | Protein of unknown function (DUF288) | chr3:21252605-21255115 REVERSE LENGTH=765	NONE	NONE	NONE
Chr3:21277250-21277649	hyper	19	0	143	0.0602	0.2305	3.8321	NONE	NONE	NONE	NONE	NONE	NONE	AT3G57470-AT3G57480
Chr3:21961850-21962049	hyper	7	0	74	0.0328	0.1608	4.8949	AT3G59420	-	protein_coding_gene	Symbols: ACR4, CR4 | crinkly4 | chr3:21959871-21962558 REVERSE LENGTH=895	NONE	NONE	NONE
Chr3:22067450-22067799	hyper	10	3	158	0.0136	0.0429	3.1448	AT3G59740	-	protein_coding_gene	Symbols: | Concanavalin A-like lectin protein kinase family protein | chr3:22067079-22069058 REVERSE LENGTH=659	NONE	NONE	NONE
Chr3:22219150-22219399	hyper	10	0	78	0.0212	0.1329	6.2644	AT3G60140	+	protein_coding_gene	Symbols: DIN2, SRG2, BGLU30 | Glycosyl hydrolase superfamily protein | chr3:22216753-22220710 FORWARD LENGTH=577	NONE	NONE	NONE
Chr3:22746050-22746349	hyper	7	0	138	0.0097	0.0599	6.165	AT3G61470	+	protein_coding_gene	Symbols: LHCA2 | photosystem I light harvesting complex gene 2 | chr3:22745736-22747032 FORWARD LENGTH=257	NONE	NONE	NONE
Chr3:22747900-22748349	hyper	19	0	65	0.031	0.2031	6.5437	NONE	NONE	NONE	NONE	AT3TE92720	RC/Helitron	NONE
Chr3:22793550-22793899	hyper	8	0	143	0.0222	0.066	2.9679	AT3G61590	+	protein_coding_gene	Symbols: HWS, HS | Galactose oxidase/kelch repeat superfamily protein | chr3:22792914-22794149 FORWARD LENGTH=411	NONE	NONE	NONE
Chr3:23066850-23067099	hyper	8	0	100	0.0431	0.1022	2.3706	NONE	NONE	NONE	NONE	NONE	NONE	AT3G62330-AT3G62336
Chr3:23130900-23131099	hyper	9	0	88	0.0475	0.1109	2.3348	NONE	NONE	NONE	NONE	NONE	NONE	AT3G62510-AT3G62528
Chr3:23193750-23194049	hyper	8	0	142	0.0067	0.0508	7.567	AT3G62700	-	protein_coding_gene	Symbols: ATMRP10, MRP10, ABCC14 | multidrug resistance-associated protein 10 | chr3:23190428-23195727 REVERSE LENGTH=1539	NONE	NONE	NONE
Chr3:23358150-23358349	hyper	12	1	116	0.0597	0.1336	2.2371	AT3G63220	-	protein_coding_gene	Symbols: | Galactose oxidase/kelch repeat superfamily protein | chr3:23357540-23358577 REVERSE LENGTH=345	NONE	NONE	NONE
Chr3:23391250-23391449	hyper	9	2	94	0.0307	0.077	2.5091	AT3G63320	-	protein_coding_gene	Symbols: | Protein phosphatase 2C family protein | chr3:23389838-23391556 REVERSE LENGTH=423	NONE	NONE	NONE
Chr3:243500-243699	hyper	8	0	78	0.0508	0.1392	2.7415	AT3G01650	+	protein_coding_gene	Symbols: RGLG1 | RING domain ligase1 | chr3:242734-245062 FORWARD LENGTH=489	NONE	NONE	NONE
Chr3:2466550-2466749	hyper	7	0	34	0.0214	0.167	7.8116	AT3G07720	+	protein_coding_gene	Symbols: | Galactose oxidase/kelch repeat superfamily protein | chr3:2465439-2467033 FORWARD LENGTH=329	NONE	NONE	NONE
Chr3:2621500-2621799	hyper	8	1	142	0.0218	0.0543	2.492	AT3G08630	+	protein_coding_gene	Symbols: | Protein of unknown function (DUF3411) | chr3:2620943-2621962 FORWARD LENGTH=339	NONE	NONE	NONE
Chr3:28550-28749	hyper	7	0	74	0.0787	0.1734	2.2024	AT3G01085	+	protein_coding_gene	Symbols: | Protein kinase superfamily protein | chr3:28060-30556 FORWARD LENGTH=629	AT3TE00130	DNA/MuDR	NONE
Chr3:3075600-3075899	hyper	10	0	96	0.0064	0.0846	13.1742	NONE	NONE	NONE	NONE	NONE	NONE	AT3G09990-AT3G10000
Chr3:3410900-3411449	hyper	21	0	183	0.0555	0.1648	2.9678	AT3G10900	-	protein_coding_gene	Symbols: | Glycosyl hydrolase superfamily protein | chr3:3410252-3412070 REVERSE LENGTH=408	NONE	NONE	NONE
Chr3:353850-354149	hyper	7	0	145	0.0239	0.0744	3.1151	AT3G02050	+	protein_coding_gene	Symbols: KUP3, ATKUP3, ATKT4 | K+ uptake transporter 3 | chr3:350815-354135 FORWARD LENGTH=789	NONE	NONE	NONE
Chr3:357750-357949	hyper	8	0	80	0.0138	0.073	5.2882	AT3G02060	+	protein_coding_gene	Symbols: | DEAD/DEAH box helicase, putative | chr3:354409-358319 FORWARD LENGTH=823	NONE	NONE	NONE
Chr3:3664150-3664399	hyper	18	0	89	0.1355	0.2843	2.0991	NONE	NONE	NONE	NONE	NONE	NONE	AT3G11591-AT3G11600
Chr3:3860600-3860849	hyper	8	0	114	0.0278	0.0925	3.3308	AT3G12120	-	protein_coding_gene	Symbols: FAD2 | fatty acid desaturase 2 | chr3:3860592-3861743 REVERSE LENGTH=383	NONE	NONE	NONE
Chr3:400-699	hyper	9	0	118	0.0559	0.1761	3.1498	NONE	NONE	NONE	NONE	NONE	NONE	AT3G01010-AT3G01015
Chr3:4030550-4030899	hyper	12	0	179	0.0433	0.0935	2.1598	AT3G12690	-	protein_coding_gene	Symbols: AGC1.5 | AGC kinase 1.5 | chr3:4030596-4032400 REVERSE LENGTH=577	NONE	NONE	NONE
Chr3:4087050-4087449	hyper	14	0	108	0.0421	0.2822	6.7081	NONE	NONE	NONE	NONE	AT3TE17210	DNA	NONE
Chr3:4263950-4264199	hyper	7	0	94	0.0127	0.0708	5.59	NONE	NONE	NONE	NONE	NONE	NONE	AT3G13225-AT3G13226
Chr3:4866500-4866749	hyper	8	0	107	0.0243	0.1131	4.6581	NONE	NONE	NONE	NONE	AT3TE20530	LINE/L1	NONE
Chr3:4925400-4925649	hyper	7	0	97	0.0295	0.0843	2.8548	AT3G14660	+	protein_coding_gene	Symbols: CYP72A13 | cytochrome P450, family 72, subfamily A, polypeptide 13 | chr3:4924960-4926911 FORWARD LENGTH=512	NONE	NONE	NONE
Chr3:5007450-5007849	hyper	14	0	183	0.0036	0.0542	15.0677	AT3G14880	+	protein_coding_gene	Symbols: | BEST Arabidopsis thaliana protein match is: transcription factor-related (TAIR:AT4G18650.1); Has 560 Blast hits to 560 proteins in 40 species: Archae - 0; Bacteria - 0; Metazoa - 2; Fungi - 0; Plants - 558; Viruses - 0; Other Eukaryotes - 0 (source: NCBI BLink). | chr3:5006565-5007689 FORWARD LENGTH=244	NONE	NONE	NONE
Chr3:5027850-5028049	hyper	7	1	89	0.0233	0.0588	2.5196	AT3G14940	+	protein_coding_gene	Symbols: ATPPC3, PPC3 | phosphoenolpyruvate carboxylase 3 | chr3:5025584-5029476 FORWARD LENGTH=968	NONE	NONE	NONE
Chr3:5028350-5028799	hyper	19	1	203	0.0091	0.0704	7.7492	AT3G14940	+	protein_coding_gene	Symbols: ATPPC3, PPC3 | phosphoenolpyruvate carboxylase 3 | chr3:5025584-5029476 FORWARD LENGTH=968	NONE	NONE	NONE
Chr3:510100-510399	hyper	9	0	89	0.0244	0.066	2.7005	AT3G02470|AT3G02468	+|+	protein_coding_gene|protein_coding_gene	Symbols: SAMDC | S-adenosylmethionine decarboxylase | chr3:510223-511323 FORWARD LENGTH=366;Symbols: CPuORF9 | conserved peptide upstream open reading frame 9 | chr3:509815-510068 FORWARD LENGTH=52	NONE	NONE	NONE
Chr3:5469700-5470049	hyper	8	0	118	0.0146	0.0955	6.5359	NONE	NONE	NONE	NONE	NONE	NONE	AT3G16140-AT3G16150
Chr3:5508700-5509049	hyper	11	0	112	0.0567	0.1685	2.9716	NONE	NONE	NONE	NONE	AT3TE23150	DNA	NONE
Chr3:5637250-5637599	hyper	10	0	156	0.0178	0.0464	2.6088	AT3G16560	-	protein_coding_gene	Symbols: | Protein phosphatase 2C family protein | chr3:5636051-5637702 REVERSE LENGTH=493	NONE	NONE	NONE
Chr3:5730100-5730499	hyper	19	0	162	0.0378	0.1443	3.818	NONE	NONE	NONE	NONE	NONE	NONE	AT3G16820-AT3G16830
Chr3:5835400-5835799	hyper	23	0	129	0.1047	0.3167	3.0261	NONE	NONE	NONE	NONE	NONE	NONE	AT3G17100-AT3G17120
Chr3:5980700-5980949	hyper	8	1	111	0.0353	0.0894	2.5325	AT3G17470	+	protein_coding_gene	Symbols: ATCRSH, CRSH | Ca2+-activated RelA/spot homolog | chr3:5979868-5981968 FORWARD LENGTH=583	NONE	NONE	NONE
Chr3:5983400-5983649	hyper	7	2	102	0.0158	0.0633	3.9958	AT3G17480	+	protein_coding_gene	Symbols: | F-box and associated interaction domains-containing protein | chr3:5983199-5984320 FORWARD LENGTH=373	NONE	NONE	NONE
Chr3:6001300-6001649	hyper	9	1	150	0.0171	0.0651	3.7982	AT3G17530	+	protein_coding_gene	Symbols: | F-box and associated interaction domains-containing protein | chr3:6000860-6002026 FORWARD LENGTH=388	NONE	NONE	NONE
Chr3:6031100-6031449	hyper	15	0	162	0.0653	0.131	2.0056	AT3G17630	+	protein_coding_gene	Symbols: ATCHX19, CHX19 | cation/H+ exchanger 19 | chr3:6029201-6031773 FORWARD LENGTH=800	NONE	NONE	NONE
Chr3:6571350-6571599	hyper	9	1	97	0.0568	0.123	2.1646	AT3G19040	-	protein_coding_gene	Symbols: TAF1, TAF1B, HAF2 | histone acetyltransferase of the TAFII250 family 2 | chr3:6567157-6575282 REVERSE LENGTH=1786	NONE	NONE	NONE
Chr3:6688050-6688399	hyper	14	0	184	0.0115	0.0808	7.052	AT3G19290	+	protein_coding_gene	Symbols: ABF4, AREB2 | ABRE binding factor 4 | chr3:6687956-6689784 FORWARD LENGTH=431	NONE	NONE	NONE
Chr3:6731900-6732249	hyper	10	0	152	0.0221	0.0591	2.6768	AT3G19420	+	protein_coding_gene	Symbols: ATPEN2, PEN2 | PTEN 2 | chr3:6731824-6735354 FORWARD LENGTH=611	NONE	NONE	NONE
Chr3:688000-688199	hyper	10	2	95	0.0329	0.0857	2.6031	AT3G03050	+	protein_coding_gene	Symbols: CSLD3, KJK, ATCSLD3 | cellulose synthase-like D3 | chr3:687873-691629 FORWARD LENGTH=1145	NONE	NONE	NONE
Chr3:6912300-6912649	hyper	13	0	143	0.038	0.1315	3.4636	AT3G19880	-	protein_coding_gene	Symbols: | F-box and associated interaction domains-containing protein | chr3:6911435-6912604 REVERSE LENGTH=389	NONE	NONE	NONE
Chr3:7040500-7040899	hyper	16	0	145	0.0651	0.1955	3.0012	NONE	NONE	NONE	NONE	AT3TE29575	LINE?	NONE
Chr3:7104150-7104449	hyper	8	0	137	0.021	0.0553	2.6347	AT3G20362	+	protein_coding_gene	Symbols: | unknown protein; FUNCTIONS IN: molecular_function unknown; INVOLVED IN: biological_process unknown; LOCATED IN: endomembrane system; Has 4 Blast hits to 4 proteins in 1 species: Archae - 0; Bacteria - 0; Metazoa - 0; Fungi - 0; Plants - 4; Viruses - 0; Other Eukaryotes - 0 (source: NCBI BLink). | chr3:7103817-7104250 FORWARD LENGTH=47	NONE	NONE	NONE
Chr3:7232150-7232399	hyper	8	3	89	0.0459	0.0951	2.0709	AT3G20690	-	protein_coding_gene	Symbols: | F-box and associated interaction domains-containing protein | chr3:7231570-7232682 REVERSE LENGTH=370	NONE	NONE	NONE
Chr3:7233650-7233899	hyper	7	2	95	0.0413	0.0902	2.1833	AT3G20700	-	protein_coding_gene	Symbols: | F-box associated ubiquitination effector family protein | chr3:7233525-7234505 REVERSE LENGTH=326	NONE	NONE	NONE
Chr3:7253850-7254099	hyper	8	0	88	0.0599	0.1867	3.1187	NONE	NONE	NONE	NONE	NONE	NONE	AT3G20740-AT3G20750
Chr3:7392450-7392699	hyper	7	0	93	0.0724	0.1446	1.9986	AT3G21090	-	protein_coding_gene	Symbols: | ABC-2 type transporter family protein | chr3:7391497-7394933 REVERSE LENGTH=691	NONE	NONE	NONE
Chr3:7627850-7628199	hyper	11	0	164	0.0146	0.054	3.7022	AT3G21670	-	protein_coding_gene	Symbols: | Major facilitator superfamily protein | chr3:7626942-7628954 REVERSE LENGTH=590	NONE	NONE	NONE
Chr3:7636750-7637199	hyper	23	0	142	0.0742	0.215	2.8985	NONE	NONE	NONE	NONE	AT3TE32090	LTR/Copia	NONE
Chr3:7653350-7653549	hyper	7	0	102	0.03	0.0769	2.5659	AT3G21720	-	protein_coding_gene	Symbols: ICL | isocitrate lyase | chr3:7652789-7655873 REVERSE LENGTH=576	NONE	NONE	NONE
Chr3:7679550-7679949	hyper	22	0	142	0.0171	0.2581	15.1029	NONE	NONE	NONE	NONE	NONE	NONE	AT3G21790-AT3G21800
Chr3:7703900-7704249	hyper	13	0	122	0.0879	0.193	2.196	AT3G21870	-	protein_coding_gene	Symbols: CYCP2;1 | cyclin p2;1 | chr3:7703927-7704813 REVERSE LENGTH=210	NONE	NONE	NONE
Chr3:7790800-7791099	hyper	7	0	123	0.0075	0.0496	6.6257	AT3G22104	+	protein_coding_gene	Symbols: | Phototropic-responsive NPH3 family protein | chr3:7789814-7792179 FORWARD LENGTH=506	NONE	NONE	NONE
Chr3:7803650-7803849	hyper	9	0	87	0.038	0.1156	3.045	AT3G22142	-	protein_coding_gene	Symbols: | Bifunctional inhibitor/lipid-transfer protein/seed storage 2S albumin superfamily protein | chr3:7803604-7808046 REVERSE LENGTH=1480	NONE	NONE	NONE
Chr3:7855250-7855599	hyper	9	0	124	0.0165	0.0877	5.318	AT3G22235	-	protein_coding_gene	Symbols: | BEST Arabidopsis thaliana protein match is: pathogen and circadian controlled 1 (TAIR:AT3G22231.1); Has 122 Blast hits to 122 proteins in 11 species: Archae - 0; Bacteria - 0; Metazoa - 0; Fungi - 0; Plants - 122; Viruses - 0; Other Eukaryotes - 0 (source: NCBI BLink). | chr3:7854696-7855614 REVERSE LENGTH=71	NONE	NONE	NONE
Chr3:7858100-7858399	hyper	8	0	77	0.0278	0.1361	4.8914	NONE	NONE	NONE	NONE	AT3TE32970	RC/Helitron	NONE
Chr3:7948150-7948349	hyper	7	0	64	0.0386	0.188	4.8709	AT3G22420	+	protein_coding_gene	Symbols: WNK2, ZIK3, ATWNK2 | with no lysine (K) kinase 2 | chr3:7946652-7948958 FORWARD LENGTH=568	NONE	NONE	NONE
Chr3:8026350-8026549	hyper	7	0	75	0.0335	0.1285	3.8389	AT3G22710	-	protein_coding_gene	Symbols: | F-box family protein | chr3:8026202-8027274 REVERSE LENGTH=326	NONE	NONE	NONE
Chr3:8045700-8046049	hyper	14	0	142	0.02	0.081	4.0438	AT3G22760	+	protein_coding_gene	Symbols: SOL1 | Tesmin/TSO1-like CXC domain-containing protein | chr3:8044622-8047381 FORWARD LENGTH=609	NONE	NONE	NONE
Chr3:8133100-8133499	hyper	24	0	128	0.0134	0.1635	12.1833	NONE	NONE	NONE	NONE	NONE	NONE	AT3G22940-AT3G22942
Chr3:8270750-8271099	hyper	14	0	133	0.0687	0.1679	2.4425	NONE	NONE	NONE	NONE	NONE	NONE	AT3G23171-AT3G23172
Chr3:8271550-8271899	hyper	14	0	115	0.017	0.1768	10.3752	NONE	NONE	NONE	NONE	NONE	NONE	AT3G23171-AT3G23172
Chr3:8282250-8282599	hyper	11	0	140	0.0166	0.0672	4.0531	AT3G23200	+	protein_coding_gene	Symbols: | Uncharacterised protein family (UPF0497) | chr3:8281659-8282603 FORWARD LENGTH=152	NONE	NONE	NONE
Chr3:8294600-8294899	hyper	9	0	79	0.0283	0.1356	4.7855	NONE	NONE	NONE	NONE	NONE	NONE	AT3G23230-AT3G23240
Chr3:8318450-8318799	hyper	7	0	151	0.0025	0.0454	17.8187	AT3G23270	+	protein_coding_gene	Symbols: | Regulator of chromosome condensation (RCC1) family with FYVE zinc finger domain | chr3:8316436-8320337 FORWARD LENGTH=1045	NONE	NONE	NONE
Chr3:8369500-8369849	hyper	10	0	90	0.0358	0.1267	3.5356	NONE	NONE	NONE	NONE	AT3TE35085	RC/Helitron	NONE
Chr3:8371050-8371349	hyper	8	0	97	0.0288	0.1664	5.786	NONE	NONE	NONE	NONE	AT3TE35095	RC/Helitron	NONE
Chr3:8372850-8373099	hyper	8	0	73	0.0629	0.1587	2.5241	NONE	NONE	NONE	NONE	NONE	NONE	AT3G23370-AT3G23380
Chr3:8386800-8387149	hyper	14	0	142	0.0037	0.076	20.8265	AT3G23420	-	protein_coding_gene	Symbols: | F-box and associated interaction domains-containing protein | chr3:8386273-8387324 REVERSE LENGTH=285	NONE	NONE	NONE
Chr3:8410750-8410949	hyper	7	0	14	0.0467	0.2899	6.2047	AT3G23450	+	protein_coding_gene	Symbols: | unknown protein; FUNCTIONS IN: molecular_function unknown; INVOLVED IN: biological_process unknown; LOCATED IN: endomembrane system; EXPRESSED IN: 14 plant structures; EXPRESSED DURING: 8 growth stages; Has 694543 Blast hits to 47111 proteins in 2535 species: Archae - 1794; Bacteria - 163056; Metazoa - 258989; Fungi - 49151; Plants - 70496; Viruses - 8919; Other Eukaryotes - 142138 (so…	AT3TE35255	LTR/Gypsy	NONE
Chr3:8426950-8427299	hyper	25	0	125	0.0937	0.2313	2.4673	NONE	NONE	NONE	NONE	NONE	NONE	AT3G23490-AT3G23510
Chr3:8496950-8497299	hyper	10	0	122	0.0574	0.1644	2.8629	AT3G23633	-	protein_coding_gene	Symbols: | F-box associated ubiquitination effector family protein | chr3:8496690-8497163 REVERSE LENGTH=157	NONE	NONE	NONE
Chr3:8529050-8529349	hyper	10	0	119	0.0189	0.0867	4.5873	AT3G23690	-	protein_coding_gene	Symbols: | basic helix-loop-helix (bHLH) DNA-binding superfamily protein | chr3:8528933-8530655 REVERSE LENGTH=371	NONE	NONE	NONE
Chr3:8547650-8548049	hyper	16	0	142	0.033	0.1817	5.5123	NONE	NONE	NONE	NONE	NONE	NONE	AT3G23727-AT3G23730
Chr3:8711750-8712099	hyper	11	1	175	0.0114	0.0628	5.5145	AT3G24130	-	protein_coding_gene	Symbols: | Pectin lyase-like superfamily protein | chr3:8711663-8713361 REVERSE LENGTH=335	NONE	NONE	NONE
Chr3:8714600-8715099	hyper	21	0	169	0.0377	0.1436	3.8063	NONE	NONE	NONE	NONE	NONE	NONE	AT3G24130-AT3G24140
Chr3:8790550-8790799	hyper	8	0	122	0.0499	0.1206	2.4166	AT3G24255	+	protein_coding_gene	Symbols: | RNA-directed DNA polymerase (reverse transcriptase)-related family protein | chr3:8789471-8793208 FORWARD LENGTH=746	AT3TE36835	LINE/L1	NONE
Chr3:8969750-8970049	hyper	7	0	127	0.0272	0.0679	2.5011	AT3G24580	+	protein_coding_gene	Symbols: | F-box and associated interaction domains-containing protein | chr3:8969162-8970298 FORWARD LENGTH=378	NONE	NONE	NONE
Chr3:8977750-8978449	hyper	32	0	252	0.0975	0.2626	2.6929	AT3G24610	-	protein_coding_gene	Symbols: | Galactose oxidase/kelch repeat superfamily protein | chr3:8975366-8978102 REVERSE LENGTH=445	NONE	NONE	NONE
Chr3:8983900-8984149	hyper	7	0	83	0.0503	0.1238	2.4615	NONE	NONE	NONE	NONE	NONE	NONE	AT3G24620-AT3G24630
Chr3:9100000-9100349	hyper	9	0	140	0.0109	0.0631	5.7666	AT3G24900	-	protein_coding_gene	Symbols: AtRLP39, RLP39 | receptor like protein 39 | chr3:9099183-9101837 REVERSE LENGTH=884	NONE	NONE	NONE
Chr3:9155550-9155749	hyper	7	0	92	0.0651	0.1441	2.2149	AT3G25140	+	protein_coding_gene	Symbols: GAUT8, QUA1 | Nucleotide-diphospho-sugar transferases superfamily protein | chr3:9154748-9156642 FORWARD LENGTH=559	NONE	NONE	NONE
Chr3:9209150-9209349	hyper	7	0	105	0.0045	0.0447	9.954	AT3G25290	+	protein_coding_gene	Symbols: | Auxin-responsive family protein | chr3:9208955-9210353 FORWARD LENGTH=393	NONE	NONE	NONE
Chr3:9276150-9276649	hyper	21	2	164	0.0105	0.0601	5.7031	AT3G25540	+	protein_coding_gene	Symbols: LAG1 | TRAM, LAG1 and CLN8 (TLC) lipid-sensing domain containing protein | chr3:9274752-9276261 FORWARD LENGTH=310	NONE	NONE	NONE
Chr3:9348100-9348399	hyper	7	0	83	0.0013	0.1054	78.4118	NONE	NONE	NONE	NONE	AT3TE39045	RC/Helitron	NONE
Chr3:9434900-9435199	hyper	14	0	114	0.0873	0.1949	2.2321	NONE	NONE	NONE	NONE	AT3TE39395	LINE/L1	NONE
Chr3:9562200-9562499	hyper	8	0	75	0	0.1154	11.5427	AT3G26140	-	protein_coding_gene	Symbols: | Cellulase (glycosyl hydrolase family 5) protein | chr3:9559742-9563070 REVERSE LENGTH=508	NONE	NONE	NONE
Chr3:9612050-9612399	hyper	7	0	145	0.0067	0.036	5.3366	AT3G26250	-	protein_coding_gene	Symbols: | Cysteine/Histidine-rich C1 domain family protein | chr3:9611696-9613168 REVERSE LENGTH=490	NONE	NONE	NONE
Chr3:9647600-9647949	hyper	10	0	140	0.0085	0.0535	6.2698	AT3G26330	-	protein_coding_gene	Symbols: CYP71B37 | cytochrome P450, family 71, subfamily B, polypeptide 37 | chr3:9646873-9648536 REVERSE LENGTH=500	NONE	NONE	NONE
Chr3:9861600-9861899	hyper	17	0	106	0.075	0.226	3.0145	NONE	NONE	NONE	NONE	AT3TE41060|AT3TE41065	DNA;DNA	NONE
Chr3:9936150-9936399	hyper	10	0	71	0.0395	0.2672	6.7637	NONE	NONE	NONE	NONE	NONE	NONE	AT3G26935-AT3G26940
Chr4:10007750-10008049	hyper	7	0	70	0.0246	0.1336	5.4259	NONE	NONE	NONE	NONE	NONE	NONE	AT4G18020-AT4G18030
Chr4:10297300-10297549	hyper	9	1	104	0.0496	0.127	2.5621	AT4G18710	+	protein_coding_gene	Symbols: BIN2, DWF12, UCU1, ATSK21, SK21 | Protein kinase superfamily protein | chr4:10296474-10298913 FORWARD LENGTH=380	NONE	NONE	NONE
Chr4:10390250-10390599	hyper	10	0	126	0.0195	0.0558	2.8673	AT4G18970	-	protein_coding_gene	Symbols: | GDSL-like Lipase/Acylhydrolase superfamily protein | chr4:10389308-10390808 REVERSE LENGTH=361	NONE	NONE	NONE
Chr4:10392150-10392749	hyper	22	0	255	0.0239	0.0971	4.0705	AT4G18975	-	protein_coding_gene	Symbols: | Pentatricopeptide repeat (PPR) superfamily protein | chr4:10392170-10393665 REVERSE LENGTH=287	NONE	NONE	NONE
Chr4:10703300-10703599	hyper	9	1	112	0.0336	0.0717	2.1331	AT4G19680	+	protein_coding_gene	Symbols: IRT2, ATIRT2 | iron regulated transporter 2 | chr4:10703385-10704255 FORWARD LENGTH=257	NONE	NONE	NONE
Chr4:10730350-10730649	hyper	7	0	119	0.0024	0.0242	10.0848	AT4G19720	-	protein_coding_gene	Symbols: | Glycosyl hydrolase family protein with chitinase insertion domain | chr4:10730363-10731695 REVERSE LENGTH=363	NONE	NONE	NONE
Chr4:10847800-10847999	hyper	8	0	81	0.0625	0.1546	2.4735	AT4G20040	-	protein_coding_gene	Symbols: | Pectin lyase-like superfamily protein | chr4:10847348-10848963 REVERSE LENGTH=483	NONE	NONE	NONE
Chr4:10866500-10866699	hyper	8	0	85	0.0736	0.1475	2.0054	AT4G20080	+	protein_coding_gene	Symbols: | Calcium-dependent lipid-binding (CaLB domain) plant phosphoribosyltransferase family protein | chr4:10865295-10867619 FORWARD LENGTH=774	NONE	NONE	NONE
Chr4:11007150-11007449	hyper	8	0	116	0.0266	0.0906	3.4049	AT4G20390	+	protein_coding_gene	Symbols: | Uncharacterised protein family (UPF0497) | chr4:11007068-11007869 FORWARD LENGTH=197	NONE	NONE	NONE
Chr4:11156600-11157099	hyper	14	1	193	0.0244	0.0761	3.1221	AT4G20830	+	protein_coding_gene	Symbols: | FAD-binding Berberine family protein | chr4:11155486-11157577 FORWARD LENGTH=570	NONE	NONE	NONE
Chr4:1140900-1141399	hyper	28	1	163	0.0481	0.1735	3.6085	NONE	NONE	NONE	NONE	AT4TE05810	RC/Helitron	NONE
Chr4:11572550-11572899	hyper	8	0	109	0.0026	0.0758	29.05	AT4G21800	+	protein_coding_gene	Symbols: QQT2 | P-loop containing nucleoside triphosphate hydrolases superfamily protein | chr4:11573289-11574976 FORWARD LENGTH=379	NONE	NONE	NONE
Chr4:11828250-11828499	hyper	8	0	105	0.004	0.0648	16.1862	AT4G22430	+	protein_coding_gene	Symbols: | F-box family protein | chr4:11827622-11828905 FORWARD LENGTH=427	NONE	NONE	NONE
Chr4:11828650-11828899	hyper	7	0	95	0.0015	0.0766	50.5378	AT4G22430	+	protein_coding_gene	Symbols: | F-box family protein | chr4:11827622-11828905 FORWARD LENGTH=427	NONE	NONE	NONE
Chr4:11829050-11829699	hyper	25	0	224	0.0119	0.113	9.4798	NONE	NONE	NONE	NONE	NONE	NONE	AT4G22430-AT4G22440
Chr4:11942150-11942499	hyper	13	0	137	0.0288	0.0988	3.4296	AT4G22730	+	protein_coding_gene	Symbols: | Leucine-rich repeat protein kinase family protein | chr4:11941384-11943696 FORWARD LENGTH=688	NONE	NONE	NONE
Chr4:1206750-1206949	hyper	8	2	87	0.0226	0.088	3.8897	AT4G02725	+	protein_coding_gene	Symbols: | unknown protein; FUNCTIONS IN: molecular_function unknown; INVOLVED IN: biological_process unknown; LOCATED IN: chloroplast, membrane; Has 35333 Blast hits to 34131 proteins in 2444 species: Archae - 798; Bacteria - 22429; Metazoa - 974; Fungi - 991; Plants - 531; Viruses - 0; Other Eukaryotes - 9610 (source: NCBI BLink). | chr4:1206055-1207290 FORWARD LENGTH=165	NONE	NONE	NONE
Chr4:12158400-12158649	hyper	8	1	112	0.0118	0.0526	4.4575	AT4G23230	-	protein_coding_gene	Symbols: CRK15 | cysteine-rich RLK (RECEPTOR-like protein kinase) 15 | chr4:12157827-12159919 REVERSE LENGTH=507	NONE	NONE	NONE
Chr4:12265650-12265949	hyper	7	0	115	0.0036	0.0763	21.2745	AT4G23500	+	protein_coding_gene	Symbols: | Pectin lyase-like superfamily protein | chr4:12264640-12267074 FORWARD LENGTH=495	NONE	NONE	NONE
Chr4:12368950-12369249	hyper	10	0	117	0.035	0.1252	3.5731	AT4G23740	+	protein_coding_gene	Symbols: | Leucine-rich repeat protein kinase family protein | chr4:12367063-12369159 FORWARD LENGTH=638	NONE	NONE	NONE
Chr4:12389150-12389349	hyper	8	1	91	0.0717	0.1583	2.2076	AT4G23790	+	protein_coding_gene	Symbols: TBL24 | TRICHOME BIREFRINGENCE-LIKE 24 | chr4:12387870-12389659 FORWARD LENGTH=430	NONE	NONE	NONE
Chr4:12443100-12443299	hyper	9	0	95	0.0654	0.1465	2.2386	AT4G23950	+	protein_coding_gene	Symbols: | Galactose-binding protein | chr4:12442297-12444330 FORWARD LENGTH=561	NONE	NONE	NONE
Chr4:13326000-13326249	hyper	8	0	85	0.1156	0.3175	2.7467	NONE	NONE	NONE	NONE	NONE	NONE	AT4G26340-AT4G26350
Chr4:1366800-1367099	hyper	8	0	125	0.0421	0.0957	2.2724	AT4G03090	-	protein_coding_gene	Symbols: | sequence-specific DNA binding;sequence-specific DNA binding transcription factors | chr4:1366495-1370937 REVERSE LENGTH=913	NONE	NONE	NONE
Chr4:1373150-1373999	hyper	78	0	293	0.0773	0.3625	4.6884	NONE	NONE	NONE	NONE	AT4TE06990	RC/Helitron	NONE
Chr4:13822950-13823249	hyper	8	0	118	0.0578	0.1187	2.0533	AT4G27680	+	protein_coding_gene	Symbols: | P-loop containing nucleoside triphosphate hydrolases superfamily protein | chr4:13821263-13823083 FORWARD LENGTH=398	NONE	NONE	NONE
Chr4:13830250-13830549	hyper	7	0	130	0.004	0.0607	15.1532	AT4G27710	+	protein_coding_gene	Symbols: CYP709B3 | cytochrome P450, family 709, subfamily B, polypeptide 3 | chr4:13828520-13830417 FORWARD LENGTH=518	NONE	NONE	NONE
Chr4:1441050-1441349	hyper	7	0	127	0.0081	0.0723	8.9775	AT4G03280	+	protein_coding_gene	Symbols: PETC, PGR1 | photosynthetic electron transfer C | chr4:1440314-1441717 FORWARD LENGTH=229	NONE	NONE	NONE
Chr4:14432700-14432949	hyper	7	0	82	0.0777	0.1747	2.2469	AT4G29290	-	protein_coding_gene	Symbols: LCR26 | low-molecular-weight cysteine-rich 26 | chr4:14432741-14433084 REVERSE LENGTH=77	NONE	NONE	NONE
Chr4:14683100-14683299	hyper	11	0	83	0.102	0.2194	2.151	AT4G30030	-	protein_coding_gene	Symbols: | Eukaryotic aspartyl protease family protein | chr4:14682210-14683484 REVERSE LENGTH=424	NONE	NONE	NONE
Chr4:14746800-14747049	hyper	7	0	97	0.0333	0.0936	2.807	AT4G30150	+	protein_coding_gene	Symbols: | CONTAINS InterPro DOMAIN/s: Nucleolar 27S pre-rRNA processing, Urb2/Npa2 (InterPro:IPR018849); Has 58 Blast hits to 49 proteins in 21 species: Archae - 0; Bacteria - 2; Metazoa - 2; Fungi - 0; Plants - 44; Viruses - 3; Other Eukaryotes - 7 (source: NCBI BLink). | chr4:14742452-14749764 FORWARD LENGTH=2009	NONE	NONE	NONE
Chr4:14747450-14747749	hyper	7	0	117	0.0124	0.0679	5.4568	AT4G30150	+	protein_coding_gene	Symbols: | CONTAINS InterPro DOMAIN/s: Nucleolar 27S pre-rRNA processing, Urb2/Npa2 (InterPro:IPR018849); Has 58 Blast hits to 49 proteins in 21 species: Archae - 0; Bacteria - 2; Metazoa - 2; Fungi - 0; Plants - 44; Viruses - 3; Other Eukaryotes - 7 (source: NCBI BLink). | chr4:14742452-14749764 FORWARD LENGTH=2009	NONE	NONE	NONE
Chr4:14849800-14850049	hyper	8	1	114	0.0359	0.0943	2.63	AT4G30350	+	protein_coding_gene	Symbols: | Double Clp-N motif-containing P-loop nucleoside triphosphate hydrolases superfamily protein | chr4:14848031-14850973 FORWARD LENGTH=924	NONE	NONE	NONE
Chr4:14868050-14868499	hyper	22	0	128	0.0197	0.131	6.657	AT4G30400	+	protein_coding_gene	Symbols: | RING/U-box superfamily protein | chr4:14867068-14868486 FORWARD LENGTH=472	NONE	NONE	NONE
Chr4:1513150-1513449	hyper	8	0	118	0.0123	0.0823	6.6822	AT4G03420	+	protein_coding_gene	Symbols: | Protein of unknown function (DUF789) | chr4:1512226-1513594 FORWARD LENGTH=310	NONE	NONE	NONE
Chr4:153350-153649	hyper	8	1	130	0.0284	0.0913	3.2187	AT4G00350	+	protein_coding_gene	Symbols: | MATE efflux family protein | chr4:151978-153988 FORWARD LENGTH=542	NONE	NONE	NONE
Chr4:15392300-15392599	hyper	8	2	123	0.0421	0.08	1.8986	AT4G31820	-	protein_coding_gene	Symbols: ENP, NPY1, MAB4 | Phototropic-responsive NPH3 family protein | chr4:15390788-15393627 REVERSE LENGTH=571	NONE	NONE	NONE
Chr4:15627800-15628149	hyper	10	0	127	0.0043	0.1034	23.9803	NONE	NONE	NONE	NONE	NONE	NONE	AT4G32370-AT4G32375
Chr4:1565050-1565249	hyper	7	0	20	0.0359	0.2392	6.6609	NONE	NONE	NONE	NONE	NONE	NONE	AT4G03520-AT4G03540
Chr4:15783050-15783299	hyper	8	0	112	0.0468	0.1015	2.1693	AT4G32710	+	protein_coding_gene	Symbols: | Protein kinase superfamily protein | chr4:15781362-15783242 FORWARD LENGTH=388	NONE	NONE	NONE
Chr4:1609700-1609899	hyper	12	0	96	0.0351	0.0882	2.5137	AT4G03630	+	protein_coding_gene	Symbols: | RNI-like superfamily protein | chr4:1608750-1610037 FORWARD LENGTH=220	NONE	NONE	NONE
Chr4:16442150-16442399	hyper	9	0	95	0.052	0.1774	3.4115	AT4G34390	+	protein_coding_gene	Symbols: XLG2 | extra-large GTP-binding protein 2 | chr4:16441579-16444840 FORWARD LENGTH=861	NONE	NONE	NONE
Chr4:16560550-16561049	hyper	16	0	258	0.0054	0.0498	9.2966	AT4G34710	-	protein_coding_gene	Symbols: ADC2, SPE2, ATADC2 | arginine decarboxylase 2 | chr4:16560315-16562450 REVERSE LENGTH=711	NONE	NONE	NONE
Chr4:16990750-16990949	hyper	8	0	79	0.0081	0.0783	9.6839	AT4G35870	+	protein_coding_gene	Symbols: | early-responsive to dehydration stress protein (ERD4) | chr4:16990332-16992785 FORWARD LENGTH=817	NONE	NONE	NONE
Chr4:17179100-17179399	hyper	8	0	112	0.0128	0.0689	5.3728	AT4G36360	-	protein_coding_gene	Symbols: BGAL3 | beta-galactosidase 3 | chr4:17176840-17181143 REVERSE LENGTH=856	NONE	NONE	NONE
Chr4:17204800-17204999	hyper	9	0	103	0.037	0.0766	2.0719	AT4G36430	-	protein_coding_gene	Symbols: | Peroxidase superfamily protein | chr4:17204648-17205917 REVERSE LENGTH=331	NONE	NONE	NONE
Chr4:175250-175499	hyper	10	0	106	0.0256	0.1214	4.7486	AT4G00400	-	protein_coding_gene	Symbols: GPAT8, AtGPAT8 | glycerol-3-phosphate acyltransferase 8 | chr4:174312-176734 REVERSE LENGTH=500	NONE	NONE	NONE
Chr4:17848800-17849149	hyper	7	0	138	0.0134	0.0666	4.9529	AT4G37950	+	protein_coding_gene	Symbols: | Rhamnogalacturonate lyase family protein | chr4:17844792-17849156 FORWARD LENGTH=678	NONE	NONE	NONE
Chr4:17972850-17973199	hyper	9	0	149	0.0229	0.0604	2.6398	AT4G38380	-	protein_coding_gene	Symbols: | MATE efflux family protein | chr4:17971855-17974787 REVERSE LENGTH=560	NONE	NONE	NONE
Chr4:17987550-17987749	hyper	8	0	105	0.0099	0.0542	5.4998	AT4G38430	+	protein_coding_gene	Symbols: ATROPGEF1, ROPGEF1 | rho guanyl-nucleotide exchange factor 1 | chr4:17986643-17988659 FORWARD LENGTH=548	NONE	NONE	NONE
Chr4:17989750-17990099	hyper	10	0	161	0.016	0.0635	3.973	AT4G38440	+	protein_coding_gene	Symbols: | LOCATED IN: chloroplast; EXPRESSED IN: 21 plant structures; EXPRESSED DURING: 12 growth stages; CONTAINS InterPro DOMAIN/s: RNA polymerase II-associated protein 1, C-terminal (InterPro:IPR013929), RNA polymerase II-associated protein 1, N-terminal (InterPro:IPR013930); Has 276 Blast hits to 220 proteins in 102 species: Archae - 0; Bacteria - 2; Metazoa - 151; Fungi - 65; Plants - 41; V…	NONE	NONE	NONE
Chr4:18026000-18026299	hyper	8	0	148	0.0267	0.0749	2.8087	AT4G38550	+	protein_coding_gene	Symbols: | Arabidopsis phospholipase-like protein (PEARLI 4) family | chr4:18025886-18028546 FORWARD LENGTH=612	NONE	NONE	NONE
Chr4:18222850-18223049	hyper	7	0	89	0.0356	0.0859	2.4101	AT4G39120|AT4G39110	-|-	protein_coding_gene|protein_coding_gene	Symbols: IMPL2, HISN7 | myo-inositol monophosphatase like 2 | chr4:18225578-18227988 REVERSE LENGTH=375;Symbols: | Malectin/receptor-like protein kinase family protein | chr4:18222483-18225119 REVERSE LENGTH=878	NONE	NONE	NONE
Chr4:18291800-18292149	hyper	8	0	157	0.0063	0.0394	6.301	AT4G39330	+	protein_coding_gene	Symbols: ATCAD9, CAD9 | cinnamyl alcohol dehydrogenase 9 | chr4:18291268-18292772 FORWARD LENGTH=360	NONE	NONE	NONE
Chr4:1867900-1868149	hyper	8	0	112	0.0614	0.1375	2.2387	NONE	NONE	NONE	NONE	AT4TE09195	DNA/MuDR	NONE
Chr4:2123250-2123599	hyper	10	2	155	0.011	0.0504	4.6019	AT4G04340	+	protein_coding_gene	Symbols: | ERD (early-responsive to dehydration stress) family protein | chr4:2123235-2126624 FORWARD LENGTH=772	NONE	NONE	NONE
Chr4:242900-243249	hyper	9	0	130	0.0092	0.0716	7.8009	AT4G00570	-	protein_coding_gene	Symbols: NAD-ME2 | NAD-dependent malic enzyme 2 | chr4:242817-246522 REVERSE LENGTH=607	NONE	NONE	NONE
Chr4:2429000-2429349	hyper	11	0	133	0.0377	0.1301	3.455	AT4G04770	-	protein_coding_gene	Symbols: ATABC1, LAF6, ATNAP1, ABC1 | ATP binding cassette protein 1 | chr4:2427998-2429785 REVERSE LENGTH=557	NONE	NONE	NONE
Chr4:2434450-2434799	hyper	7	0	155	0.0117	0.0492	4.1893	NONE	NONE	NONE	NONE	NONE	NONE	AT4G04780-AT4G04790
Chr4:2596800-2596999	hyper	8	0	72	0.1156	0.29	2.5097	NONE	NONE	NONE	NONE	AT4TE12170	LINE/L1	NONE
Chr4:2630700-2630999	hyper	8	0	100	0.021	0.0799	3.8139	NONE	NONE	NONE	NONE	NONE	NONE	AT4G05110-AT4G05120
Chr4:273700-273949	hyper	8	0	79	0.0199	0.1498	7.5107	NONE	NONE	NONE	NONE	NONE	NONE	AT4G00651-AT4G00660
Chr4:2763550-2763799	hyper	8	1	105	0.0488	0.1354	2.7761	AT4G05470	-	protein_coding_gene	Symbols: | RNI-like superfamily protein | chr4:2763256-2765351 REVERSE LENGTH=304	NONE	NONE	NONE
Chr4:2766250-2766499	hyper	9	1	105	0.0283	0.0781	2.7572	AT4G05475	-	protein_coding_gene	Symbols: | RNI-like superfamily protein | chr4:2765962-2767957 REVERSE LENGTH=309	NONE	NONE	NONE
Chr4:385500-385799	hyper	8	0	107	0.0236	0.0685	2.901	AT4G00900	-	protein_coding_gene	Symbols: ECA2, ATECA2 | ER-type Ca2+-ATPase 2 | chr4:382690-386226 REVERSE LENGTH=1054	NONE	NONE	NONE
Chr4:38750-39099	hyper	16	1	180	0.0316	0.0771	2.4445	AT4G00110	-	protein_coding_gene	Symbols: GAE3 | UDP-D-glucuronate 4-epimerase 3 | chr4:38702-39994 REVERSE LENGTH=430	NONE	NONE	NONE
Chr4:3950700-3950899	hyper	17	1	79	0.0428	0.0902	2.108	NONE	NONE	NONE	NONE	NONE	NONE	AT4G06688-AT4G06740
Chr4:3952950-3953149	hyper	8	1	78	0.0534	0.122	2.2861	NONE	NONE	NONE	NONE	NONE	NONE	AT4G06688-AT4G06740
Chr4:5166500-5166749	hyper	10	0	74	0.0112	0.085	7.5692	AT4G08170	-	protein_coding_gene	Symbols: | Inositol 1,3,4-trisphosphate 5/6-kinase family protein | chr4:5163707-5166094 REVERSE LENGTH=265	AT4TE21450|AT4TE21455	LINE/L1;LINE/L1	NONE
Chr4:5230800-5231049	hyper	8	0	97	0.0557	0.1155	2.0743	AT4G08280	+	protein_coding_gene	Symbols: | Thioredoxin superfamily protein | chr4:5230345-5231196 FORWARD LENGTH=126	AT4TE21780	RC/Helitron	NONE
Chr4:5394350-5394749	hyper	22	0	84	0.0663	0.3381	5.0974	AT4G08485	-	protein_coding_gene	Symbols: | Defensin-like (DEFL) family protein | chr4:5394425-5394782 REVERSE LENGTH=86	AT4TE22540|AT4TE22545	DNA/MuDR;DNA/MuDR	NONE
Chr4:5403900-5404249	hyper	10	0	122	0.0022	0.0702	32.2979	AT4G08500	-	protein_coding_gene	Symbols: MEKK1, ATMEKK1, MAPKKK8, ARAKIN | MAPK/ERK kinase kinase 1 | chr4:5404272-5407062 REVERSE LENGTH=608	NONE	NONE	NONE
Chr4:544700-545049	hyper	10	0	147	0.0249	0.0636	2.5553	AT4G01310	-	protein_coding_gene	Symbols: | Ribosomal L5P family protein | chr4:544166-545480 REVERSE LENGTH=262	NONE	NONE	NONE
Chr4:5617200-5617399	hyper	7	0	50	0.0211	0.1354	6.4027	AT4G08810	-	protein_coding_gene	Symbols: SUB1 | calcium ion binding | chr4:5616204-5617862 REVERSE LENGTH=552	NONE	NONE	NONE
Chr4:565450-565749	hyper	8	0	125	0.003	0.0528	17.3767	AT4G01360	+	protein_coding_gene	Symbols: | unknown protein; BEST Arabidopsis thaliana protein match is: Protein of unknown function (DUF793) (TAIR:AT1G01550.2); Has 99 Blast hits to 99 proteins in 25 species: Archae - 0; Bacteria - 10; Metazoa - 0; Fungi - 0; Plants - 89; Viruses - 0; Other Eukaryotes - 0 (source: NCBI BLink). | chr4:565147-566193 FORWARD LENGTH=348	NONE	NONE	NONE
Chr4:5698850-5699199	hyper	10	0	115	0.0407	0.0981	2.4082	NONE	NONE	NONE	NONE	AT4TE23830	RathE1_cons	NONE
Chr4:5725150-5725399	hyper	10	0	112	0.0462	0.1393	3.0179	AT4G08920	+	protein_coding_gene	Symbols: CRY1, BLU1, HY4, OOP2, ATCRY1 | cryptochrome 1 | chr4:5724260-5726905 FORWARD LENGTH=681	NONE	NONE	NONE
Chr4:5746850-5747149	hyper	7	0	120	0.0239	0.1147	4.8008	AT4G08960	+	protein_coding_gene	Symbols: | phosphotyrosyl phosphatase activator (PTPA) family protein | chr4:5746326-5747994 FORWARD LENGTH=392	NONE	NONE	NONE
Chr4:5759900-5760099	hyper	7	0	83	0.0154	0.1168	7.5872	AT4G08980	+	protein_coding_gene	Symbols: FBW2 | F-BOX WITH WD-40 2 | chr4:5758993-5760108 FORWARD LENGTH=317	NONE	NONE	NONE
Chr4:5761100-5761499	hyper	21	0	146	0.0378	0.1682	4.4445	NONE	NONE	NONE	NONE	NONE	NONE	AT4G08980-AT4G08990
Chr4:5765200-5765899	hyper	26	0	286	0.0179	0.1021	5.693	AT4G08990	+	protein_coding_gene	Symbols: | DNA (cytosine-5-)-methyltransferase family protein | chr4:5764781-5770496 FORWARD LENGTH=1512	NONE	NONE	NONE
Chr4:5793900-5794099	hyper	7	0	69	0.059	0.1199	2.0323	NONE	NONE	NONE	NONE	AT4TE24340	LINE/L1	NONE
Chr4:6067050-6067349	hyper	9	0	94	0.044	0.1937	4.4056	NONE	NONE	NONE	NONE	NONE	NONE	AT4G09590-AT4G09600
Chr4:6076350-6076699	hyper	12	0	126	0.1086	0.235	2.1646	NONE	NONE	NONE	NONE	NONE	NONE	AT4G09610-AT4G09620
Chr4:6092300-6092799	hyper	22	0	177	0.0572	0.2103	3.6758	NONE	NONE	NONE	NONE	NONE	NONE	AT4G09640-AT4G09647
Chr4:6116950-6117299	hyper	7	0	150	0.0098	0.0297	3.0327	AT4G09680	+	protein_coding_gene	Symbols: CTC1, ATCTC1 | conserved telomere maintenance component 1 | chr4:6116819-6123017 FORWARD LENGTH=1274	NONE	NONE	NONE
Chr4:62050-62399	hyper	13	0	139	0.0336	0.1109	3.2991	NONE	NONE	NONE	NONE	NONE	NONE	AT4G00150-AT4G00160
Chr4:625200-625449	hyper	10	1	124	0.012	0.0673	5.6038	AT4G01470	-	protein_coding_gene	Symbols: GAMMA-TIP3, TIP1;3, ATTIP1.3 | tonoplast intrinsic protein 1;3 | chr4:625092-625850 REVERSE LENGTH=252	NONE	NONE	NONE
Chr4:6329300-6329599	hyper	7	0	131	0.0084	0.0412	4.9229	AT4G10150	+	protein_coding_gene	Symbols: | RING/U-box superfamily protein | chr4:6328136-6329558 FORWARD LENGTH=236	NONE	NONE	NONE
Chr4:6456950-6457249	hyper	8	0	85	0.028	0.1212	4.3328	AT4G10430	-	protein_coding_gene	Symbols: | TMPIT-like protein | chr4:6455110-6457996 REVERSE LENGTH=347	NONE	NONE	NONE
Chr4:6481950-6482299	hyper	12	0	92	0.0573	0.2275	3.9699	NONE	NONE	NONE	NONE	NONE	NONE	AT4G10480-AT4G10490
Chr4:6523650-6523899	hyper	8	0	91	0.0108	0.0812	7.5155	AT4G10570	-	protein_coding_gene	Symbols: UBP9 | ubiquitin-specific protease 9 | chr4:6523657-6528058 REVERSE LENGTH=923	NONE	NONE	NONE
Chr4:661250-661799	hyper	39	0	188	0.0086	0.1975	22.8595	NONE	NONE	NONE	NONE	AT4TE03410|AT4TE03415	Unassigned;RC/Helitron	NONE
Chr4:6617450-6617749	hyper	19	0	115	0.104	0.2183	2.099	AT4G10740	-	protein_coding_gene	Symbols: | F-box and associated interaction domains-containing protein | chr4:6617143-6618426 REVERSE LENGTH=427	NONE	NONE	NONE
Chr4:6622600-6622949	hyper	12	0	148	0.0571	0.1294	2.2666	AT4G10760	-	protein_coding_gene	Symbols: EMB1706, MTA | mRNAadenosine methylase | chr4:6619947-6623312 REVERSE LENGTH=685	NONE	NONE	NONE
Chr4:6647000-6647599	hyper	22	0	226	0.0847	0.2064	2.4364	NONE	NONE	NONE	NONE	AT4TE28490	LINE/L1	NONE
Chr4:665450-665699	hyper	8	0	57	0.0683	0.257	3.7639	NONE	NONE	NONE	NONE	NONE	NONE	AT4G01520-AT4G01535
Chr4:6698800-6699099	hyper	7	0	66	0.0018	0.0198	10.873	AT4G10920	-	protein_coding_gene	Symbols: KELP | transcriptional coactivator p15 (PC4) family protein (KELP) | chr4:6697894-6699103 REVERSE LENGTH=165	NONE	NONE	NONE
Chr4:6750150-6750449	hyper	7	0	138	0.0094	0.0337	3.6007	AT4G11050	-	protein_coding_gene	Symbols: AtGH9C3, GH9C3 | glycosyl hydrolase 9C3 | chr4:6747498-6751311 REVERSE LENGTH=626	NONE	NONE	NONE
Chr4:6935300-6935549	hyper	8	0	78	0.0214	0.2073	9.693	NONE	NONE	NONE	NONE	NONE	NONE	AT4G11393-AT4G11400
Chr4:7089500-7089999	hyper	43	0	182	0.0366	0.2187	5.9815	NONE	NONE	NONE	NONE	AT4TE30760	LTR/Copia	NONE
Chr4:7215300-7215649	hyper	12	0	158	0.0559	0.1226	2.1953	AT4G12040	+	protein_coding_gene	Symbols: | A20/AN1-like zinc finger family protein | chr4:7215341-7215868 FORWARD LENGTH=175	NONE	NONE	NONE
Chr4:732350-732549	hyper	8	1	79	0.0204	0.0977	4.7985	AT4G01690|AT4G01700	+|-	protein_coding_gene|protein_coding_gene	Symbols: PPOX, HEMG1, PPO1 | Flavin containing amine oxidoreductase family | chr4:729929-732309 FORWARD LENGTH=537;Symbols: | Chitinase family protein | chr4:732413-733487 REVERSE LENGTH=280	NONE	NONE	NONE
Chr4:7356550-7356949	hyper	22	0	148	0.0514	0.2298	4.4726	NONE	NONE	NONE	NONE	NONE	NONE	AT4G12430-AT4G12432
Chr4:7520150-7520599	hyper	20	0	167	0.0108	0.1459	13.4896	NONE	NONE	NONE	NONE	AT4TE32815	LINE/L1	NONE
Chr4:7523150-7523349	hyper	8	0	83	0.0506	0.1346	2.6623	AT4G12810	-	protein_coding_gene	Symbols: | F-box family protein | chr4:7522831-7523979 REVERSE LENGTH=382	NONE	NONE	NONE
Chr4:7523500-7523699	hyper	7	0	82	0.0422	0.1006	2.3825	AT4G12810	-	protein_coding_gene	Symbols: | F-box family protein | chr4:7522831-7523979 REVERSE LENGTH=382	NONE	NONE	NONE
Chr4:7527000-7527249	hyper	8	0	88	0.0954	0.1883	1.9742	AT4G12820	-	protein_coding_gene	Symbols: | F-box family protein with a domain of unknown function (DUF295) | chr4:7527048-7528890 REVERSE LENGTH=442	NONE	NONE	NONE
Chr4:7559600-7559849	hyper	9	0	96	0.0599	0.1388	2.3178	NONE	NONE	NONE	NONE	AT4TE32995	LTR/Gypsy	NONE
Chr4:7657450-7657749	hyper	10	0	153	0.0081	0.0535	6.6309	AT4G13180	-	protein_coding_gene	Symbols: | NAD(P)-binding Rossmann-fold superfamily protein | chr4:7657373-7658164 REVERSE LENGTH=263	NONE	NONE	NONE
Chr4:7797550-7797799	hyper	7	0	115	0.0215	0.0562	2.613	AT4G13420	-	protein_coding_gene	Symbols: HAK5, ATHAK5 | high affinity K+ transporter 5 | chr4:7797038-7802174 REVERSE LENGTH=785	NONE	NONE	NONE
Chr4:7800650-7800949	hyper	7	0	98	0.0465	0.1641	3.5313	AT4G13420	-	protein_coding_gene	Symbols: HAK5, ATHAK5 | high affinity K+ transporter 5 | chr4:7797038-7802174 REVERSE LENGTH=785	AT4TE34220	RC/Helitron	NONE
Chr4:7827800-7828149	hyper	11	0	127	0.0212	0.1876	8.8537	NONE	NONE	NONE	NONE	AT4TE34335|AT4TE34340	RC/Helitron;LINE/L1	NONE
Chr4:7923700-7923999	hyper	9	0	115	0.056	0.1557	2.7821	NONE	NONE	NONE	NONE	NONE	NONE	AT4G13610-AT4G13615
Chr4:7969500-7969849	hyper	23	1	114	0.0662	0.2468	3.7289	NONE	NONE	NONE	NONE	AT4TE35075	RC/Helitron	NONE
Chr4:8088100-8088349	hyper	9	0	95	0.081	0.1965	2.4258	AT4G13992	+	protein_coding_gene	Symbols: | Cysteine/Histidine-rich C1 domain family protein | chr4:8087340-8089268 FORWARD LENGTH=642	NONE	NONE	NONE
Chr4:8159400-8159649	hyper	10	0	110	0.018	0.0889	4.9478	AT4G14150	-	protein_coding_gene	Symbols: PAKRP1, KINESIN-12A | phragmoplast-associated kinesin-related protein 1 | chr4:8158645-8165008 REVERSE LENGTH=1292	NONE	NONE	NONE
Chr4:8252250-8252599	hyper	7	0	86	0.0241	0.231	9.6024	NONE	NONE	NONE	NONE	AT4TE36530	LTR/Copia	NONE
Chr4:8308350-8308699	hyper	12	0	90	0.0173	0.1954	11.3126	NONE	NONE	NONE	NONE	NONE	NONE	AT4G14440-AT4G14450
Chr4:8347150-8347599	hyper	18	0	139	0.0379	0.1655	4.3682	NONE	NONE	NONE	NONE	NONE	NONE	AT4G14540-AT4G14550
Chr4:8384600-8384799	hyper	8	0	93	0.0324	0.1014	3.1285	AT4G14615	+	protein_coding_gene	Symbols: | unknown protein; FUNCTIONS IN: molecular_function unknown; INVOLVED IN: biological_process unknown; LOCATED IN: endomembrane system; EXPRESSED IN: 24 plant structures; EXPRESSED DURING: 15 growth stages; CONTAINS InterPro DOMAIN/s: Protein of unknown function DUF2346 (InterPro:IPR018625); BEST Arabidopsis thaliana protein match is: unknown protein (TAIR:AT1G52825.1); Has 30201 Blast hi…	NONE	NONE	NONE
Chr4:8458450-8458749	hyper	9	0	118	0.0039	0.0748	19.3625	NONE	NONE	NONE	NONE	NONE	NONE	AT4G14740-AT4G14746
Chr4:8562900-8563099	hyper	7	0	88	0.0358	0.1054	2.949	AT4G14980	-	protein_coding_gene	Symbols: | Cysteine/Histidine-rich C1 domain family protein | chr4:8561970-8563607 REVERSE LENGTH=545	NONE	NONE	NONE
Chr4:8568000-8568249	hyper	9	0	94	0.0667	0.1715	2.5714	AT4G14990	-	protein_coding_gene	Symbols: | Topoisomerase II-associated protein PAT1 | chr4:8566259-8569511 REVERSE LENGTH=787	NONE	NONE	NONE
Chr4:8663350-8663599	hyper	7	0	98	0.0442	0.1156	2.6164	AT4G15200	-	protein_coding_gene	Symbols: AFH3, FH3 | formin 3 | chr4:8662993-8665759 REVERSE LENGTH=764	NONE	NONE	NONE
Chr4:8808900-8809099	hyper	7	0	83	0.0203	0.1208	5.9447	AT4G15396	+	protein_coding_gene	Symbols: CYP702A6 | cytochrome P450, family 702, subfamily A, polypeptide 6 | chr4:8807574-8810419 FORWARD LENGTH=475	NONE	NONE	NONE
Chr4:9255450-9255899	hyper	29	0	267	0.0122	0.0781	6.4115	AT4G16380	+	protein_coding_gene	Symbols: | Heavy metal transport/detoxification superfamily protein | chr4:9254638-9255955 FORWARD LENGTH=254	NONE	NONE	NONE
Chr4:9292000-9292349	hyper	12	0	170	0.0212	0.0953	4.4926	AT4G16480	+	protein_coding_gene	Symbols: ATINT4, INT4 | inositol transporter 4 | chr4:9291246-9293083 FORWARD LENGTH=582	NONE	NONE	NONE
Chr4:9309850-9310049	hyper	8	0	80	0.0061	0.0848	13.983	NONE	NONE	NONE	NONE	NONE	NONE	AT4G16520-AT4G16530
Chr4:9362150-9362499	hyper	10	0	144	0.006	0.064	10.6347	AT4G16630	-	protein_coding_gene	Symbols: | DEA(D/H)-box RNA helicase family protein | chr4:9362176-9366449 REVERSE LENGTH=789	NONE	NONE	NONE
Chr4:9446450-9446649	hyper	7	0	46	0.0131	0.1661	12.7085	NONE	NONE	NONE	NONE	NONE	NONE	AT4G16770-AT4G16780
Chr4:9526500-9526749	hyper	8	0	103	0.0358	0.1045	2.9205	NONE	NONE	NONE	NONE	NONE	NONE	AT4G16920-AT4G16930
Chr4:9746300-9746599	hyper	8	0	112	0.0146	0.0627	4.3117	AT4G17480	-	protein_coding_gene	Symbols: | alpha/beta-Hydrolases superfamily protein | chr4:9745313-9746847 REVERSE LENGTH=304	NONE	NONE	NONE
Chr4:9940900-9941199	hyper	7	0	113	0.0304	0.069	2.2734	AT4G17895	+	protein_coding_gene	Symbols: UBP20 | ubiquitin-specific protease 20 | chr4:9939914-9942698 FORWARD LENGTH=695	NONE	NONE	NONE
Chr5:10026400-10026599	hyper	7	0	72	0.0354	0.0838	2.3707	AT5G28020	-	protein_coding_gene	Symbols: CYSD2, ATCYSD2 | cysteine synthase D2 | chr5:10026395-10028166 REVERSE LENGTH=323	NONE	NONE	NONE
Chr5:10136100-10136649	hyper	18	0	152	0.0454	0.1515	3.3385	AT5G28150	+	protein_coding_gene	Symbols: | Plant protein of unknown function (DUF868) | chr5:10135826-10136695 FORWARD LENGTH=289	NONE	NONE	NONE
Chr5:10239750-10240099	hyper	8	0	107	0.0188	0.073	3.8819	NONE	NONE	NONE	NONE	AT5TE37345	RC/Helitron	NONE
Chr5:10318350-10318999	hyper	43	1	262	0.0161	0.1538	9.5647	NONE	NONE	NONE	NONE	AT5TE37690	LTR/Gypsy	NONE
Chr5:10358100-10359449	hyper	59	0	393	0.0407	0.2174	5.3434	AT5G28410	+	protein_coding_gene	Symbols: | unknown protein; Has 8 Blast hits to 7 proteins in 2 species: Archae - 0; Bacteria - 0; Metazoa - 0; Fungi - 0; Plants - 8; Viruses - 0; Other Eukaryotes - 0 (source: NCBI BLink). | chr5:10358373-10359438 FORWARD LENGTH=106	AT5TE37810|AT5TE37815	LTR/Copia;LTR/Copia	NONE
Chr5:10428650-10428899	hyper	9	0	83	0.0389	0.1589	4.086	NONE	NONE	NONE	NONE	NONE	NONE	AT5G28465-AT5G28470
Chr5:10432250-10432449	hyper	8	0	66	0.0359	0.1258	3.5033	AT5G28470	+	protein_coding_gene	Symbols: | Major facilitator superfamily protein | chr5:10429813-10432357 FORWARD LENGTH=559	NONE	NONE	NONE
Chr5:10480500-10480699	hyper	8	0	62	0.1058	0.2331	2.2043	NONE	NONE	NONE	NONE	NONE	NONE	AT5G28500-AT5G28510
Chr5:10504250-10504649	hyper	14	0	152	0.0522	0.1763	3.3792	NONE	NONE	NONE	NONE	NONE	NONE	AT5G28520-AT5G28530
Chr5:10506600-10506799	hyper	7	1	54	0.0841	0.2148	2.5559	NONE	NONE	NONE	NONE	NONE	NONE	AT5G28520-AT5G28530
Chr5:1109550-1109799	hyper	7	0	84	0.0186	0.1045	5.6057	NONE	NONE	NONE	NONE	NONE	NONE	AT5G04090-AT5G04110
Chr5:1163000-1163249	hyper	9	0	117	0.0209	0.0646	3.0899	AT5G04230	+	protein_coding_gene	Symbols: PAL3, ATPAL3 | phenyl alanine ammonia-lyase 3 | chr5:1160831-1163707 FORWARD LENGTH=694	NONE	NONE	NONE
Chr5:12560250-12560549	hyper	7	0	146	0.0203	0.058	2.8596	AT5G33290	+	protein_coding_gene	Symbols: XGD1 | xylogalacturonan deficient 1 | chr5:12558439-12561840 FORWARD LENGTH=500	NONE	NONE	NONE
Chr5:12595500-12595849	hyper	9	0	145	0.0162	0.0504	3.1157	AT5G33340	+	protein_coding_gene	Symbols: CDR1 | Eukaryotic aspartyl protease family protein | chr5:12594474-12595787 FORWARD LENGTH=437	NONE	NONE	NONE
Chr5:13339700-13340199	hyper	22	0	170	0.0461	0.1784	3.8723	NONE	NONE	NONE	NONE	AT5TE47230|AT5TE47235	DNA/MuDR;RC/Helitron	NONE
Chr5:13676000-13676349	hyper	13	0	135	0.0599	0.1631	2.7202	NONE	NONE	NONE	NONE	AT5TE48660|AT5TE48665	RC/Helitron;RC/Helitron	NONE
Chr5:13755050-13755399	hyper	11	0	119	0.0822	0.2127	2.5864	NONE	NONE	NONE	NONE	NONE	NONE	AT5G35570-AT5G35580
Chr5:13834500-13834949	hyper	33	0	211	0.0759	0.1819	2.3967	AT5G35640	+	protein_coding_gene	Symbols: | Putative endonuclease or glycosyl hydrolase | chr5:13834633-13835606 FORWARD LENGTH=192	NONE	NONE	NONE
Chr5:13858300-13858599	hyper	8	0	103	0.0578	0.1216	2.1029	AT5G35680	-	protein_coding_gene	Symbols: | Nucleic acid-binding, OB-fold-like protein | chr5:13858152-13858589 REVERSE LENGTH=145	NONE	NONE	NONE
Chr5:1386650-1386949	hyper	9	0	120	0.0091	0.0626	6.8525	NONE	NONE	NONE	NONE	NONE	NONE	AT5G04780-AT5G04790
Chr5:13953350-13953649	hyper	11	0	134	0.002	0.0608	30.8852	NONE	NONE	NONE	NONE	AT5TE49725	LTR/Copia	NONE
Chr5:14088600-14089099	hyper	22	0	219	0.0423	0.135	3.1872	NONE	NONE	NONE	NONE	NONE	NONE	AT5G35930-AT5G35940
Chr5:14094000-14094249	hyper	8	0	89	0.0622	0.1492	2.3984	AT5G35945	+	protein_coding_gene	Symbols: | unknown protein; BEST Arabidopsis thaliana protein match is: unknown protein (TAIR:AT3G43410.1); Has 30201 Blast hits to 17322 proteins in 780 species: Archae - 12; Bacteria - 1396; Metazoa - 17338; Fungi - 3422; Plants - 5037; Viruses - 0; Other Eukaryotes - 2996 (source: NCBI BLink). | chr5:14093675-14094277 FORWARD LENGTH=127	NONE	NONE	NONE
Chr5:14265700-14266099	hyper	17	0	134	0.04	0.1515	3.7903	NONE	NONE	NONE	NONE	AT5TE50980|AT5TE50985	RC/Helitron;RC/Helitron	NONE
Chr5:14585300-14585499	hyper	9	0	59	0.0387	0.1814	4.6846	NONE	NONE	NONE	NONE	NONE	NONE	AT5G36930-AT5G36940
Chr5:14594350-14594699	hyper	11	0	117	0.0355	0.2051	5.7765	AT5G36940	+	protein_coding_gene	Symbols: CAT3 | cationic amino acid transporter 3 | chr5:14590330-14594137 FORWARD LENGTH=609	AT5TE52460	DNA/MuDR	NONE
Chr5:14641800-14641999	hyper	8	0	80	0.0639	0.1467	2.2952	AT5G37055	-	protein_coding_gene	Symbols: ATSWC6, SEF | HIT-type Zinc finger family protein | chr5:14641634-14642387 REVERSE LENGTH=171	NONE	NONE	NONE
Chr5:14750800-14750999	hyper	7	1	85	0.0496	0.1221	2.4611	AT5G37250	+	protein_coding_gene	Symbols: | RING/U-box superfamily protein | chr5:14750393-14750971 FORWARD LENGTH=192	NONE	NONE	NONE
Chr5:14756400-14756599	hyper	11	0	92	0.105	0.2178	2.0745	NONE	NONE	NONE	NONE	NONE	NONE	AT5G37260-AT5G37270
Chr5:14780550-14780849	hyper	12	0	114	0.0649	0.2075	3.1983	NONE	NONE	NONE	NONE	AT5TE53290|AT5TE53295|AT5TE53300	LINE/L1;LTR/Gypsy;LTR/Gypsy	NONE
Chr5:14821450-14821749	hyper	11	0	98	0.0236	0.1766	7.4807	NONE	NONE	NONE	NONE	AT5TE53435|AT5TE53440	RC/Helitron;LINE?	NONE
Chr5:14824400-14824649	hyper	8	0	103	0.0358	0.0847	2.3678	NONE	NONE	NONE	NONE	AT5TE53455	LTR/Copia	NONE
Chr5:1488250-1488799	hyper	24	0	168	0.017	0.2041	12.0008	NONE	NONE	NONE	NONE	AT5TE05390	RC/Helitron	NONE
Chr5:14922200-14922499	hyper	9	0	98	0.0723	0.1712	2.3686	AT5G37560	+	protein_coding_gene	Symbols: | RING/U-box superfamily protein | chr5:14921986-14923790 FORWARD LENGTH=444	NONE	NONE	NONE
Chr5:14967850-14968199	hyper	8	0	97	0.0079	0.1221	15.3864	NONE	NONE	NONE	NONE	NONE	NONE	AT5G37660-AT5G37667
Chr5:15191950-15192149	hyper	7	4	78	0.0668	0.1457	2.1793	AT5G38080	-	protein_coding_gene	Symbols: | unknown protein; BEST Arabidopsis thaliana protein match is: unknown protein (TAIR:AT5G38090.1); Has 1807 Blast hits to 1807 proteins in 277 species: Archae - 0; Bacteria - 0; Metazoa - 736; Fungi - 347; Plants - 385; Viruses - 0; Other Eukaryotes - 339 (source: NCBI BLink). | chr5:15191715-15192645 REVERSE LENGTH=157	AT5TE54960	DNA	NONE
Chr5:15232750-15232999	hyper	8	0	102	0.049	0.1102	2.2494	NONE	NONE	NONE	NONE	AT5TE55130	LINE/L1	NONE
Chr5:15290900-15291299	hyper	36	0	185	0.1276	0.2774	2.1732	NONE	NONE	NONE	NONE	AT5TE55320|AT5TE55325|AT5TE55330	RC/Helitron;RC/Helitron;LTR/Copia	NONE
Chr5:15304750-15305099	hyper	11	0	138	0.045	0.1193	2.6525	AT5G38290	+	protein_coding_gene	Symbols: | Peptidyl-tRNA hydrolase family protein | chr5:15303603-15305381 FORWARD LENGTH=246	NONE	NONE	NONE
Chr5:15505750-15505999	hyper	7	0	69	0.0678	0.1732	2.5537	NONE	NONE	NONE	NONE	AT5TE56050	DNA/MuDR	NONE
Chr5:15591450-15591649	hyper	7	0	78	0.0605	0.1831	3.0266	NONE	NONE	NONE	NONE	AT5TE56385	LINE/L1	NONE
Chr5:15644350-15644699	hyper	10	0	158	0.0026	0.0254	9.7261	AT5G39090	+	protein_coding_gene	Symbols: | HXXXD-type acyl-transferase family protein | chr5:15643612-15644958 FORWARD LENGTH=448	NONE	NONE	NONE
Chr5:15722000-15722449	hyper	40	0	168	0.1267	0.317	2.5026	NONE	NONE	NONE	NONE	AT5TE56780	LINE/L1	NONE
Chr5:15841100-15841449	hyper	18	0	131	0.1397	0.3076	2.2018	NONE	NONE	NONE	NONE	NONE	NONE	AT5G39550-AT5G39560
Chr5:15942050-15942249	hyper	9	0	80	0.0084	0.0607	7.1927	NONE	NONE	NONE	NONE	AT5TE57560	DNA/MuDR	NONE
Chr5:15975350-15975649	hyper	11	0	127	0.0308	0.1049	3.4007	AT5G39890	+	protein_coding_gene	Symbols: | Protein of unknown function (DUF1637) | chr5:15974543-15976013 FORWARD LENGTH=276	NONE	NONE	NONE
Chr5:16393150-16393399	hyper	8	0	96	0.0576	0.1584	2.7488	AT5G40900	+	protein_coding_gene	Symbols: | Nucleotide-diphospho-sugar transferase family protein | chr5:16391847-16393375 FORWARD LENGTH=322	NONE	NONE	NONE
Chr5:16478000-16478349	hyper	17	1	168	0.0872	0.1864	2.1379	AT5G41160	+	protein_coding_gene	Symbols: ATPUP12, PUP12 | purine permease 12 | chr5:16477360-16478436 FORWARD LENGTH=358	NONE	NONE	NONE
Chr5:1655000-1655399	hyper	22	0	151	0.0606	0.186	3.0678	NONE	NONE	NONE	NONE	AT5TE05980	RC/Helitron	NONE
Chr5:16604100-16604399	hyper	9	0	122	0.0372	0.1228	3.3016	AT5G41500	+	protein_coding_gene	Symbols: | F-box and associated interaction domains-containing protein | chr5:16604002-16605213 FORWARD LENGTH=403	NONE	NONE	NONE
Chr5:16640650-16640849	hyper	7	0	91	0.0388	0.1016	2.6216	AT5G41610	-	protein_coding_gene	Symbols: ATCHX18, CHX18 | cation/H+ exchanger 18 | chr5:16638554-16641146 REVERSE LENGTH=810	NONE	NONE	NONE
Chr5:16694050-16694299	hyper	9	0	115	0.0212	0.0546	2.5787	AT5G41750	+	protein_coding_gene	Symbols: | Disease resistance protein (TIR-NBS-LRR class) family | chr5:16694047-16697527 FORWARD LENGTH=1068	NONE	NONE	NONE
Chr5:16837500-16837799	hyper	9	0	121	0.0562	0.1248	2.2199	AT5G42140	-	protein_coding_gene	Symbols: | Regulator of chromosome condensation (RCC1) family with FYVE zinc finger domain | chr5:16837547-16841640 REVERSE LENGTH=1073	NONE	NONE	NONE
Chr5:17107300-17107699	hyper	18	0	127	0.0323	0.2056	6.356	NONE	NONE	NONE	NONE	AT5TE61790|AT5TE61795	RC/Helitron;LINE/L1	NONE
Chr5:17142000-17142199	hyper	11	0	83	0.0407	0.0896	2.2028	NONE	NONE	NONE	NONE	AT5TE61910	LINE?	NONE
Chr5:17270100-17270399	hyper	7	0	151	0.02	0.0641	3.1972	AT5G43060	-	protein_coding_gene	Symbols: | Granulin repeat cysteine protease family protein | chr5:17269784-17272117 REVERSE LENGTH=463	NONE	NONE	NONE
Chr5:17291400-17291699	hyper	9	0	105	0.118	0.2553	2.1633	NONE	NONE	NONE	NONE	NONE	NONE	AT5G43070-AT5G43080
Chr5:17358950-17359349	hyper	32	1	154	0.1394	0.2894	2.0757	NONE	NONE	NONE	NONE	NONE	NONE	AT5G43260-AT5G43270
Chr5:17435800-17436049	hyper	7	1	68	0.0414	0.1929	4.6626	NONE	NONE	NONE	NONE	NONE	NONE	AT5G43410-AT5G43420
Chr5:17501150-17501449	hyper	7	0	113	0.0168	0.0682	4.0563	AT5G43560	+	protein_coding_gene	Symbols: | TRAF-like superfamily protein | chr5:17501043-17505526 FORWARD LENGTH=1055	NONE	NONE	NONE
Chr5:17519200-17519549	hyper	8	0	186	0.0105	0.0319	3.0442	AT5G43610	+	protein_coding_gene	Symbols: ATSUC6, SUC6 | sucrose-proton symporter 6 | chr5:17519079-17521008 FORWARD LENGTH=492	NONE	NONE	NONE
Chr5:17539700-17539899	hyper	7	0	96	0.0609	0.1349	2.2144	AT5G43670	-	protein_coding_gene	Symbols: | Sec23/Sec24 protein transport family protein | chr5:17539025-17541733 REVERSE LENGTH=794	NONE	NONE	NONE
Chr5:17610150-17610449	hyper	10	0	84	0.0897	0.2064	2.3017	NONE	NONE	NONE	NONE	NONE	NONE	AT5G43790-AT5G43810
Chr5:17826600-17827099	hyper	22	0	163	0.0666	0.2114	3.1741	NONE	NONE	NONE	NONE	AT5TE64380	RC/Helitron	NONE
Chr5:17875700-17875899	hyper	7	0	88	0.0157	0.0845	5.3918	AT5G44370	-	protein_coding_gene	Symbols: PHT4;6 | phosphate transporter 4;6 | chr5:17875147-17876445 REVERSE LENGTH=432	NONE	NONE	NONE
Chr5:17916450-17916649	hyper	8	0	53	0.0774	0.2389	3.0868	NONE	NONE	NONE	NONE	NONE	NONE	AT5G44450-AT5G44460
Chr5:18016800-18017149	hyper	13	1	147	0.0918	0.1947	2.1199	AT5G44660	+	protein_coding_gene	Symbols: | unknown protein; BEST Arabidopsis thaliana protein match is: unknown protein (TAIR:AT4G20190.1); Has 944 Blast hits to 462 proteins in 141 species: Archae - 2; Bacteria - 370; Metazoa - 161; Fungi - 102; Plants - 64; Viruses - 6; Other Eukaryotes - 239 (source: NCBI BLink). | chr5:18015810-18017081 FORWARD LENGTH=423	NONE	NONE	NONE
Chr5:1815300-1815499	hyper	7	0	60	0.0537	0.1564	2.9118	AT5G06040	+	protein_coding_gene	Symbols: | self-incompatibility protein-related | chr5:1815128-1816037 FORWARD LENGTH=111	NONE	NONE	NONE
Chr5:18170000-18170299	hyper	7	0	116	0.0273	0.0587	2.1481	AT5G45020	+	protein_coding_gene	Symbols: | Glutathione S-transferase family protein | chr5:18169206-18170488 FORWARD LENGTH=325	NONE	NONE	NONE
Chr5:18428350-18428699	hyper	12	0	169	0.0288	0.0729	2.5295	AT5G45480	-	protein_coding_gene	Symbols: | Protein of unknown function (DUF594) | chr5:18426296-18428929 REVERSE LENGTH=877	NONE	NONE	NONE
Chr5:18617950-18618199	hyper	8	0	105	0.0673	0.1415	2.1034	AT5G45900	+	protein_coding_gene	Symbols: APG7, ATAPG7, ATG7, ATATG7 | ThiF family protein | chr5:18615304-18618436 FORWARD LENGTH=697	NONE	NONE	NONE
Chr5:18618950-18619199	hyper	7	0	103	0.053	0.1032	1.9478	NONE	NONE	NONE	NONE	NONE	NONE	AT5G45900-AT5G45910
Chr5:18650350-18650699	hyper	18	0	126	0.1217	0.231	1.8989	AT5G45980	+	protein_coding_gene	Symbols: WOX8, STPL | WUSCHEL related homeobox 8 | chr5:18648921-18650698 FORWARD LENGTH=325	AT5TE67140	DNA/MuDR	NONE
Chr5:18776800-18777049	hyper	11	0	76	0.1269	0.2538	1.9991	NONE	NONE	NONE	NONE	NONE	NONE	AT5G46290-AT5G46295
Chr5:18819450-18819749	hyper	8	0	163	0.032	0.0635	1.9848	NONE	NONE	NONE	NONE	NONE	NONE	AT5G46390-AT5G46400
Chr5:18942250-18942599	hyper	12	0	138	0.0082	0.0809	9.8918	AT5G46680	+	protein_coding_gene	Symbols: | Pentatricopeptide repeat (PPR-like) superfamily protein | chr5:18941118-18942524 FORWARD LENGTH=468	NONE	NONE	NONE
Chr5:19056550-19056749	hyper	8	0	68	0.0212	0.1334	6.2908	AT5G46930	-	protein_coding_gene	Symbols: | Plant invertase/pectin methylesterase inhibitor superfamily protein | chr5:19056655-19057191 REVERSE LENGTH=178	AT5TE68535|AT5TE68540	DNA/Pogo;RC/Helitron	NONE
Chr5:19138950-19139299	hyper	14	0	103	0.0053	0.1082	20.5713	NONE	NONE	NONE	NONE	AT5TE68840|AT5TE68845|AT5TE68850	RC/Helitron;DNA;DNA	NONE
Chr5:19174450-19174699	hyper	8	0	98	0.0309	0.1144	3.7073	NONE	NONE	NONE	NONE	AT5TE68990	LINE/L1	NONE
Chr5:19198250-19198499	hyper	10	0	106	0.0532	0.1367	2.5703	AT5G47300	+	protein_coding_gene	Symbols: | F-box and associated interaction domains-containing protein | chr5:19198125-19199375 FORWARD LENGTH=416	NONE	NONE	NONE
Chr5:19199050-19199249	hyper	10	0	86	0.1115	0.2346	2.1048	AT5G47300	+	protein_coding_gene	Symbols: | F-box and associated interaction domains-containing protein | chr5:19198125-19199375 FORWARD LENGTH=416	NONE	NONE	NONE
Chr5:19310300-19310599	hyper	8	0	129	0.0443	0.0955	2.1568	AT5G47650	-	protein_coding_gene	Symbols: ATNUDT2, ATNUDX2, NUDT2 | nudix hydrolase homolog 2 | chr5:19310391-19312084 REVERSE LENGTH=278	NONE	NONE	NONE
Chr5:19380300-19380599	hyper	10	0	153	0.0059	0.0567	9.5383	AT5G47850	-	protein_coding_gene	Symbols: CCR4 | CRINKLY4 related 4 | chr5:19378803-19381058 REVERSE LENGTH=751	NONE	NONE	NONE
Chr5:19400750-19401099	hyper	15	0	184	0.0309	0.0749	2.4257	AT5G47910	+	protein_coding_gene	Symbols: RBOHD, ATRBOHD | respiratory burst oxidase homologue D | chr5:19397585-19401768 FORWARD LENGTH=921	NONE	NONE	NONE
Chr5:19404650-19404899	hyper	8	0	103	0.0564	0.1196	2.1184	NONE	NONE	NONE	NONE	NONE	NONE	AT5G47920-AT5G47928
Chr5:19529350-19529649	hyper	10	0	130	0.0432	0.1058	2.4471	AT5G48160	-	protein_coding_gene	Symbols: OBE2 | Protein of unknown function (DUF1423) | chr5:19528019-19529820 REVERSE LENGTH=574	NONE	NONE	NONE
Chr5:19622900-19623249	hyper	16	0	149	0.0294	0.1203	4.0877	AT5G48410	+	protein_coding_gene	Symbols: ATGLR1.3, GLR1.3 | glutamate receptor 1.3 | chr5:19620316-19623277 FORWARD LENGTH=860	NONE	NONE	NONE
Chr5:19830000-19830249	hyper	12	0	94	0.1118	0.2497	2.2331	NONE	NONE	NONE	NONE	NONE	NONE	AT5G48900-AT5G48905
Chr5:20048350-20048849	hyper	32	0	198	0.0674	0.2004	2.974	AT5G49440	+	protein_coding_gene	Symbols: | unknown protein; Has 30201 Blast hits to 17322 proteins in 780 species: Archae - 12; Bacteria - 1396; Metazoa - 17338; Fungi - 3422; Plants - 5037; Viruses - 0; Other Eukaryotes - 2996 (source: NCBI BLink). | chr5:20048918-20049463 FORWARD LENGTH=181	AT5TE72200	LINE?	NONE
Chr5:20232650-20233149	hyper	19	0	194	0.0447	0.135	3.0206	AT5G49780	+	protein_coding_gene	Symbols: | Leucine-rich repeat protein kinase family protein | chr5:20229499-20233095 FORWARD LENGTH=857	AT5TE72860|AT5TE72865	DNA/HAT;DNA/HAT	NONE
Chr5:20261200-20261449	hyper	7	0	101	0.0262	0.0693	2.6492	AT5G49850	-	protein_coding_gene	Symbols: | Mannose-binding lectin superfamily protein | chr5:20260049-20262232 REVERSE LENGTH=596	NONE	NONE	NONE
Chr5:20296750-20296949	hyper	7	0	52	0.0828	0.2339	2.825	AT5G49900	-	protein_coding_gene	Symbols: | Beta-glucosidase, GBA2 type family protein | chr5:20297235-20302019 REVERSE LENGTH=957	AT5TE73100	LINE/L1	NONE
Chr5:20314800-20315199	hyper	16	0	123	0.0805	0.2154	2.6768	NONE	NONE	NONE	NONE	NONE	NONE	AT5G49930-AT5G49940
Chr5:20433300-20433649	hyper	13	0	130	0.0174	0.0963	5.5296	NONE	NONE	NONE	NONE	NONE	NONE	AT5G50180-AT5G50200
Chr5:20893300-20893599	hyper	7	0	109	0.0142	0.0725	5.0979	AT5G51450	+	protein_coding_gene	Symbols: RIN3 | RPM1 interacting protein 3 | chr5:20893164-20897223 FORWARD LENGTH=577	NONE	NONE	NONE
Chr5:21018700-21018949	hyper	7	0	89	0.0244	0.0946	3.8821	AT5G51740	+	protein_coding_gene	Symbols: | Peptidase family M48 family protein | chr5:21017110-21018987 FORWARD LENGTH=442	NONE	NONE	NONE
Chr5:21021500-21021899	hyper	17	0	179	0.0205	0.0911	4.4421	AT5G51750	+	protein_coding_gene	Symbols: ATSBT1.3, SBT1.3 | subtilase 1.3 | chr5:21020266-21022608 FORWARD LENGTH=780	NONE	NONE	NONE
Chr5:21080850-21081099	hyper	11	1	100	0.0522	0.1161	2.2244	AT5G51850	+	protein_coding_gene	Symbols: | unknown protein; BEST Arabidopsis thaliana protein match is: unknown protein (TAIR:AT5G62170.1); Has 384 Blast hits to 375 proteins in 79 species: Archae - 0; Bacteria - 14; Metazoa - 135; Fungi - 31; Plants - 92; Viruses - 0; Other Eukaryotes - 112 (source: NCBI BLink). | chr5:21079419-21081478 FORWARD LENGTH=590	NONE	NONE	NONE
Chr5:21224550-21224749	hyper	7	0	66	0.0632	0.2147	3.3971	NONE	NONE	NONE	NONE	NONE	NONE	AT5G52270-AT5G52280
Chr5:21274050-21274299	hyper	8	0	113	0.0329	0.0809	2.4597	AT5G52400	+	protein_coding_gene	Symbols: CYP715A1 | cytochrome P450, family 715, subfamily A, polypeptide 1 | chr5:21272949-21275509 FORWARD LENGTH=519	NONE	NONE	NONE
Chr5:21305900-21306299	hyper	14	0	109	0.0402	0.1569	3.8987	NONE	NONE	NONE	NONE	NONE	NONE	AT5G52500-AT5G52510
Chr5:21482850-21483199	hyper	7	0	120	0.0379	0.0895	2.3613	AT5G52980	-	protein_coding_gene	Symbols: | CONTAINS InterPro DOMAIN/s: ATPase, vacuolar ER assembly factor, Vma12 (InterPro:IPR021013); Has 1807 Blast hits to 1807 proteins in 277 species: Archae - 0; Bacteria - 0; Metazoa - 736; Fungi - 347; Plants - 385; Viruses - 0; Other Eukaryotes - 339 (source: NCBI BLink). | chr5:21482329-21483642 REVERSE LENGTH=222	NONE	NONE	NONE
Chr5:2153950-2154249	hyper	8	0	118	0.0263	0.0604	2.298	AT5G06950	+	protein_coding_gene	Symbols: AHBP-1B, TGA2 | bZIP transcription factor family protein | chr5:2152323-2154174 FORWARD LENGTH=330	NONE	NONE	NONE
Chr5:215400-215599	hyper	8	0	86	0.0283	0.075	2.6484	AT5G01550	-	protein_coding_gene	Symbols: LECRKA4.2 | lectin receptor kinase a4.1 | chr5:214517-216583 REVERSE LENGTH=688	NONE	NONE	NONE
Chr5:21542900-21543199	hyper	9	0	116	0.1194	0.2449	2.0517	NONE	NONE	NONE	NONE	AT5TE77610	LTR/Copia	NONE
Chr5:21727900-21728199	hyper	7	0	108	0.0438	0.1272	2.9054	AT5G53500	-	protein_coding_gene	Symbols: | Transducin/WD40 repeat-like superfamily protein | chr5:21726167-21728524 REVERSE LENGTH=654	NONE	NONE	NONE
Chr5:21758000-21758349	hyper	14	0	157	0.0372	0.1046	2.8089	AT5G53550	+	protein_coding_gene	Symbols: YSL3, ATYSL3 | YELLOW STRIPE like 3 | chr5:21756081-21758776 FORWARD LENGTH=675	NONE	NONE	NONE
Chr5:21922600-21922799	hyper	7	0	61	0.0396	0.1129	2.8515	AT5G54020	-	protein_coding_gene	Symbols: | Cysteine/Histidine-rich C1 domain family protein | chr5:21921864-21923534 REVERSE LENGTH=556	NONE	NONE	NONE
Chr5:22306600-22306799	hyper	7	0	93	0.0367	0.1002	2.734	AT5G54930	-	protein_coding_gene	Symbols: | AT hook motif-containing protein | chr5:22305897-22306839 REVERSE LENGTH=286	NONE	NONE	NONE
Chr5:22443950-22444299	hyper	10	0	175	0.0163	0.0474	2.9101	AT5G55360	-	protein_coding_gene	Symbols: | MBOAT (membrane bound O-acyl transferase) family protein | chr5:22443724-22444752 REVERSE LENGTH=342	NONE	NONE	NONE
Chr5:22664000-22664299	hyper	11	0	133	0.0777	0.1509	1.9425	AT5G55960	+	protein_coding_gene	Symbols: | unknown protein; CONTAINS InterPro DOMAIN/s: Uncharacterised protein family UPF0118 (InterPro:IPR002549); Has 30201 Blast hits to 17322 proteins in 780 species: Archae - 12; Bacteria - 1396; Metazoa - 17338; Fungi - 3422; Plants - 5037; Viruses - 0; Other Eukaryotes - 2996 (source: NCBI BLink). | chr5:22662726-22664762 FORWARD LENGTH=648	NONE	NONE	NONE
Chr5:22804850-22805099	hyper	7	0	60	0.0067	0.3247	48.5428	NONE	NONE	NONE	NONE	AT5TE82040	RC/Helitron	NONE
Chr5:2289050-2289349	hyper	9	2	148	0.0622	0.1379	2.2156	NONE	NONE	NONE	NONE	AT5TE08310	LINE/L1	NONE
Chr5:23345200-23345399	hyper	8	0	90	0.0288	0.124	4.3064	AT5G57640	+	protein_coding_gene	Symbols: | GCK domain-containing protein | chr5:23344766-23345446 FORWARD LENGTH=226	NONE	NONE	NONE
Chr5:23362600-23362899	hyper	13	0	109	0.0636	0.171	2.6909	AT5G57670	-	protein_coding_gene	Symbols: | Protein kinase superfamily protein | chr5:23360531-23363694 REVERSE LENGTH=579	NONE	NONE	NONE
Chr5:23387050-23387349	hyper	7	0	136	0.0431	0.1224	2.8424	AT5G57710	+	protein_coding_gene	Symbols: | Double Clp-N motif-containing P-loop nucleoside triphosphate hydrolases superfamily protein | chr5:23384794-23388052 FORWARD LENGTH=990	NONE	NONE	NONE
Chr5:2346300-2346599	hyper	11	0	126	0.0575	0.1595	2.7723	AT5G07410	+	protein_coding_gene	Symbols: | Pectin lyase-like superfamily protein | chr5:2345852-2347276 FORWARD LENGTH=361	NONE	NONE	NONE
Chr5:2374150-2374449	hyper	9	0	117	0.12	0.2693	2.2446	NONE	NONE	NONE	NONE	AT5TE08630	LINE/L1	NONE
Chr5:23914600-23914849	hyper	12	3	118	0.0409	0.0865	2.1139	AT5G59280	-	protein_coding_gene	Symbols: APUM16, PUM16 | pumilio 16 | chr5:23914141-23915139 REVERSE LENGTH=332	NONE	NONE	NONE
Chr5:2396000-2396299	hyper	15	1	127	0.0543	0.1736	3.1956	AT5G07570	+	protein_coding_gene	Symbols: | glycine/proline-rich protein | chr5:2391722-2396329 FORWARD LENGTH=1504	NONE	NONE	NONE
Chr5:24011600-24011849	hyper	14	0	122	0.0539	0.1482	2.7513	AT5G59600	-	protein_coding_gene	Symbols: | Tetratricopeptide repeat (TPR)-like superfamily protein | chr5:24011315-24012919 REVERSE LENGTH=534	NONE	NONE	NONE
Chr5:24031600-24031799	hyper	8	0	88	0.0449	0.12	2.675	AT5G59650	+	protein_coding_gene	Symbols: | Leucine-rich repeat protein kinase family protein | chr5:24031346-24035100 FORWARD LENGTH=892	NONE	NONE	NONE
Chr5:24032150-24032499	hyper	7	0	147	0.0132	0.0671	5.0778	AT5G59650	+	protein_coding_gene	Symbols: | Leucine-rich repeat protein kinase family protein | chr5:24031346-24035100 FORWARD LENGTH=892	NONE	NONE	NONE
Chr5:24032850-24033199	hyper	8	0	129	0.0356	0.088	2.4703	AT5G59650	+	protein_coding_gene	Symbols: | Leucine-rich repeat protein kinase family protein | chr5:24031346-24035100 FORWARD LENGTH=892	NONE	NONE	NONE
Chr5:24184250-24184449	hyper	7	2	82	0.0315	0.0643	2.0433	AT5G60050	-	protein_coding_gene	Symbols: | BTB/POZ domain-containing protein | chr5:24183680-24185264 REVERSE LENGTH=499	NONE	NONE	NONE
Chr5:24245350-24245649	hyper	8	0	133	0.0318	0.071	2.2295	AT5G60210	-	protein_coding_gene	Symbols: RIP5 | ROP interactive partner 5 | chr5:24243529-24245889 REVERSE LENGTH=564	NONE	NONE	NONE
Chr5:24723400-24723799	hyper	27	0	139	0.069	0.251	3.6372	AT5G61470	+	protein_coding_gene	Symbols: | C2H2-like zinc finger protein | chr5:24722870-24723784 FORWARD LENGTH=304	NONE	NONE	NONE
Chr5:24851150-24851349	hyper	7	0	79	0.0199	0.1144	5.7387	AT5G61880	+	protein_coding_gene	Symbols: | Protein Transporter, Pam16 | chr5:24850598-24851512 FORWARD LENGTH=113	NONE	NONE	NONE
Chr5:24927650-24927949	hyper	13	0	136	0.063	0.1299	2.0637	AT5G62060	+	protein_coding_gene	Symbols: | F-box and associated interaction domains-containing protein | chr5:24927688-24928698 FORWARD LENGTH=303	NONE	NONE	NONE
Chr5:25198850-25199149	hyper	8	1	141	0.0137	0.0297	2.1659	AT5G62730	+	protein_coding_gene	Symbols: | Major facilitator superfamily protein | chr5:25197494-25200033 FORWARD LENGTH=589	NONE	NONE	NONE
Chr5:25710550-25710749	hyper	7	0	92	0.0428	0.1153	2.6918	AT5G64270	+	protein_coding_gene	Symbols: | splicing factor, putative | chr5:25706909-25710718 FORWARD LENGTH=1269	NONE	NONE	NONE
Chr5:25715750-25716049	hyper	8	0	122	0.004	0.0427	10.6721	AT5G64290	-	protein_coding_gene	Symbols: DCT, DIT2.1 | dicarboxylate transport 2.1 | chr5:25714495-25716642 REVERSE LENGTH=563	NONE	NONE	NONE
Chr5:25886150-25886449	hyper	7	0	131	0.0252	0.0689	2.7412	AT5G64740	+	protein_coding_gene	Symbols: CESA6, IXR2, E112, PRC1 | cellulose synthase 6 | chr5:25881555-25886333 FORWARD LENGTH=1084	NONE	NONE	NONE
Chr5:26160250-26160549	hyper	8	0	121	0.0187	0.0608	3.2539	AT5G65450	+	protein_coding_gene	Symbols: UBP17 | ubiquitin-specific protease 17 | chr5:26157863-26161096 FORWARD LENGTH=731	NONE	NONE	NONE
Chr5:268300-268649	hyper	16	0	145	0.0225	0.1198	5.3351	AT5G01720	-	protein_coding_gene	Symbols: | RNI-like superfamily protein | chr5:267118-270391 REVERSE LENGTH=665	NONE	NONE	NONE
Chr5:2986850-2987149	hyper	8	0	118	0.0418	0.0841	2.0102	AT5G09630	-	protein_coding_gene	Symbols: | LisH/CRA/RING-U-box domains-containing protein | chr5:2986016-2987176 REVERSE LENGTH=386	NONE	NONE	NONE
Chr5:3061100-3061449	hyper	11	0	146	0.0314	0.0877	2.7907	AT5G09840	+	protein_coding_gene	Symbols: | Putative endonuclease or glycosyl hydrolase | chr5:3059027-3061970 FORWARD LENGTH=924	NONE	NONE	NONE
Chr5:3074700-3074949	hyper	11	0	102	0.048	0.145	3.0188	AT5G09870	+	protein_coding_gene	Symbols: CESA5 | cellulose synthase 5 | chr5:3073356-3077974 FORWARD LENGTH=1069	NONE	NONE	NONE
Chr5:3155650-3155899	hyper	7	0	111	0.027	0.0583	2.1592	AT5G10090	-	protein_coding_gene	Symbols: TPR13 | Tetratricopeptide repeat (TPR)-like superfamily protein | chr5:3153722-3155745 REVERSE LENGTH=594	NONE	NONE	NONE
Chr5:3253000-3253299	hyper	34	1	164	0.1245	0.2402	1.9294	AT5G10340	+	protein_coding_gene	Symbols: | F-box family protein | chr5:3253122-3255045 FORWARD LENGTH=445	NONE	NONE	NONE
Chr5:3298750-3299049	hyper	8	0	110	0.0161	0.0604	3.7601	AT5G10480	-	protein_coding_gene	Symbols: PAS2, PEP | Protein-tyrosine phosphatase-like, PTPLA | chr5:3298047-3300048 REVERSE LENGTH=221	NONE	NONE	NONE
Chr5:3607700-3607999	hyper	10	0	125	0.023	0.0807	3.5097	AT5G11310	+	protein_coding_gene	Symbols: | Pentatricopeptide repeat (PPR) superfamily protein | chr5:3606490-3608409 FORWARD LENGTH=602	NONE	NONE	NONE
Chr5:3752050-3752349	hyper	10	0	92	0.047	0.196	4.1679	NONE	NONE	NONE	NONE	NONE	NONE	AT5G11660-AT5G11670
Chr5:3793250-3793549	hyper	8	0	72	0.049	0.2772	5.6613	NONE	NONE	NONE	NONE	NONE	NONE	AT5G11770-AT5G11780
Chr5:385500-385799	hyper	11	0	113	0.0094	0.0814	8.7059	AT5G02010	+	protein_coding_gene	Symbols: ATROPGEF7, ROPGEF7 | RHO guanyl-nucleotide exchange factor 7 | chr5:383493-385698 FORWARD LENGTH=546	NONE	NONE	NONE
Chr5:3910450-3910799	hyper	19	1	139	0.0954	0.2225	2.3309	AT5G12090	+	protein_coding_gene	Symbols: | Protein kinase superfamily protein | chr5:3909703-3910877 FORWARD LENGTH=369	NONE	NONE	NONE
Chr5:3913050-3913399	hyper	8	0	137	0.0139	0.0592	4.2498	AT5G12100	+	protein_coding_gene	Symbols: | pentatricopeptide (PPR) repeat-containing protein | chr5:3911388-3913838 FORWARD LENGTH=816	NONE	NONE	NONE
Chr5:3950900-3951099	hyper	7	0	84	0.037	0.121	3.2659	AT5G12220	+	protein_coding_gene	Symbols: | las1-like family protein | chr5:3950218-3953014 FORWARD LENGTH=611	NONE	NONE	NONE
Chr5:4297800-4298099	hyper	8	0	139	0.0428	0.0969	2.2663	AT5G13400	-	protein_coding_gene	Symbols: | Major facilitator superfamily protein | chr5:4296854-4299079 REVERSE LENGTH=624	NONE	NONE	NONE
Chr5:4381350-4381649	hyper	7	0	131	0.0101	0.0537	5.3324	AT5G13600	+	protein_coding_gene	Symbols: | Phototropic-responsive NPH3 family protein | chr5:4380432-4382497 FORWARD LENGTH=591	NONE	NONE	NONE
Chr5:4390500-4391099	hyper	15	0	290	0.0199	0.0536	2.7011	AT5G13630	-	protein_coding_gene	Symbols: GUN5, CCH, CHLH, CCH1, ABAR | magnesium-chelatase subunit chlH, chloroplast, putative / Mg-protoporphyrin IX chelatase, putative (CHLH) | chr5:4387567-4392082 REVERSE LENGTH=1381	NONE	NONE	NONE
Chr5:4405750-4406199	hyper	21	0	186	0.0251	0.1112	4.4322	AT5G13660	+	protein_coding_gene	Symbols: | unknown protein; BEST Arabidopsis thaliana protein match is: unknown protein (TAIR:AT5G59830.2); Has 135 Blast hits to 126 proteins in 13 species: Archae - 0; Bacteria - 0; Metazoa - 0; Fungi - 0; Plants - 135; Viruses - 0; Other Eukaryotes - 0 (source: NCBI BLink). | chr5:4405094-4406983 FORWARD LENGTH=536	NONE	NONE	NONE
Chr5:4410450-4410749	hyper	10	0	131	0.0114	0.0703	6.1923	AT5G13680	-	protein_coding_gene	Symbols: ELO2, ABO1 | IKI3 family protein | chr5:4410522-4415471 REVERSE LENGTH=1319	NONE	NONE	NONE
Chr5:4436300-4436549	hyper	8	0	92	0.0302	0.096	3.1813	AT5G13740	+	protein_coding_gene	Symbols: ZIF1 | zinc induced facilitator 1 | chr5:4432689-4436483 FORWARD LENGTH=486	NONE	NONE	NONE
Chr5:4455900-4456299	hyper	21	1	180	0.0237	0.1332	5.6081	AT5G13810	+	protein_coding_gene	Symbols: | Glutaredoxin family protein | chr5:4455769-4456593 FORWARD LENGTH=274	NONE	NONE	NONE
Chr5:486600-487149	hyper	67	0	191	0.0688	0.318	4.6194	NONE	NONE	NONE	NONE	NONE	NONE	AT5G02320-AT5G02330
Chr5:4899800-4900149	hyper	8	0	145	0.0046	0.0401	8.6385	AT5G15120	+	protein_coding_gene	Symbols: | Protein of unknown function (DUF1637) | chr5:4898814-4900351 FORWARD LENGTH=293	NONE	NONE	NONE
Chr5:491500-492099	hyper	63	0	217	0.0723	0.2843	3.9299	NONE	NONE	NONE	NONE	NONE	NONE	AT5G02330-AT5G02340
Chr5:499500-499799	hyper	8	0	121	0.0014	0.0396	29.2853	NONE	NONE	NONE	NONE	NONE	NONE	AT5G02350-AT5G02360
Chr5:502950-503449	hyper	41	0	159	0.0032	0.2211	68.2228	AT5G02370	+	protein_coding_gene	Symbols: | ATP binding microtubule motor family protein | chr5:503444-506388 FORWARD LENGTH=628	NONE	NONE	NONE
Chr5:554950-555249	hyper	8	0	144	0.0069	0.0513	7.3875	AT5G02500	-	protein_coding_gene	Symbols: HSC70-1, HSP70-1, AT-HSC70-1, HSC70 | heat shock cognate protein 70-1 | chr5:554055-556334 REVERSE LENGTH=651	NONE	NONE	NONE
Chr5:5855000-5855249	hyper	7	0	79	0.0507	0.1101	2.1709	NONE	NONE	NONE	NONE	AT5TE21170|AT5TE21175	RC/Helitron;RC/Helitron	NONE
Chr5:595300-595799	hyper	20	0	149	0.0146	0.2018	13.8106	NONE	NONE	NONE	NONE	NONE	NONE	AT5G02640-AT5G02650
Chr5:596000-596349	hyper	13	0	106	0.0164	0.1448	8.824	NONE	NONE	NONE	NONE	NONE	NONE	AT5G02640-AT5G02650
Chr5:609400-609699	hyper	9	0	100	0.0238	0.1299	5.4477	AT5G02700	-	protein_coding_gene	Symbols: | F-box/RNI-like superfamily protein | chr5:609381-611679 REVERSE LENGTH=456	NONE	NONE	NONE
Chr5:6252450-6252699	hyper	8	0	88	0.0317	0.1368	4.3137	NONE	NONE	NONE	NONE	NONE	NONE	AT5G18740-AT5G18748
Chr5:660550-660899	hyper	19	0	113	0.0784	0.2258	2.8788	NONE	NONE	NONE	NONE	NONE	NONE	AT5G02870-AT5G02880
Chr5:6774750-6775249	hyper	17	0	210	0.0336	0.0885	2.635	AT5G20050	+	protein_coding_gene	Symbols: | Protein kinase superfamily protein | chr5:6774381-6775739 FORWARD LENGTH=452	NONE	NONE	NONE
Chr5:6844900-6845199	hyper	7	0	137	0.0065	0.0293	4.4878	AT5G20280	-	protein_coding_gene	Symbols: ATSPS1F, SPS1F | sucrose phosphate synthase 1F | chr5:6844994-6849997 REVERSE LENGTH=1043	NONE	NONE	NONE
Chr5:7010800-7010999	hyper	7	0	89	0.0227	0.0913	4.0185	AT5G20710	+	protein_coding_gene	Symbols: BGAL7 | beta-galactosidase 7 | chr5:7010536-7013994 FORWARD LENGTH=826	NONE	NONE	NONE
Chr5:7027450-7027799	hyper	20	1	113	0.1229	0.334	2.7182	NONE	NONE	NONE	NONE	NONE	NONE	AT5G20740-AT5G20790
Chr5:7475000-7475399	hyper	16	0	182	0.0211	0.0843	3.9948	AT5G22510	-	protein_coding_gene	Symbols: INV-E, At-A/N-InvE | alkaline/neutral invertase | chr5:7474974-7477479 REVERSE LENGTH=617	NONE	NONE	NONE
Chr5:7476100-7476449	hyper	14	0	149	0.0562	0.1359	2.4201	AT5G22510	-	protein_coding_gene	Symbols: INV-E, At-A/N-InvE | alkaline/neutral invertase | chr5:7474974-7477479 REVERSE LENGTH=617	NONE	NONE	NONE
Chr5:7514800-7515149	hyper	11	0	108	0.0073	0.1371	18.7594	NONE	NONE	NONE	NONE	AT5TE27170	DNA/Harbinger	NONE
Chr5:7666750-7667049	hyper	10	0	123	0.0114	0.0757	6.6304	AT5G22920	+	protein_coding_gene	Symbols: | CHY-type/CTCHY-type/RING-type Zinc finger protein | chr5:7665143-7667031 FORWARD LENGTH=291	NONE	NONE	NONE
Chr5:7821600-7821799	hyper	7	0	64	0.0337	0.1756	5.2093	NONE	NONE	NONE	NONE	AT5TE28295|AT5TE28300|AT5TE28305	DNA/MuDR;RC/Helitron;RC/Helitron	NONE
Chr5:808300-808549	hyper	7	0	82	0.0221	0.1229	5.5609	AT5G03330	+	protein_coding_gene	Symbols: | Cysteine proteinases superfamily protein | chr5:807728-809608 FORWARD LENGTH=356	NONE	NONE	NONE
Chr5:8218700-8219049	hyper	12	0	151	0.0757	0.1561	2.0617	AT5G24210	+	protein_coding_gene	Symbols: | alpha/beta-Hydrolases superfamily protein | chr5:8217877-8219466 FORWARD LENGTH=350	NONE	NONE	NONE
Chr5:8252050-8252349	hyper	9	0	115	0.0143	0.0727	5.0998	AT5G24280	-	protein_coding_gene	Symbols: GMI1 | gamma-irradiation and mitomycin c induced 1 | chr5:8251378-8261401 REVERSE LENGTH=1598	NONE	NONE	NONE
Chr5:8322400-8322699	hyper	12	0	111	0.1168	0.2996	2.5659	NONE	NONE	NONE	NONE	AT5TE30075	DNA/HAT	NONE
Chr5:8363900-8364149	hyper	11	0	113	0.0696	0.155	2.2275	AT5G24480	-	protein_coding_gene	Symbols: | Beta-galactosidase related protein | chr5:8363831-8365036 REVERSE LENGTH=350	NONE	NONE	NONE
Chr5:8371800-8371999	hyper	9	0	95	0.0253	0.104	4.1163	AT5G24520	-	protein_coding_gene	Symbols: TTG1, TTG, URM23, ATTTG1 | Transducin/WD40 repeat-like superfamily protein | chr5:8371708-8372733 REVERSE LENGTH=341	NONE	NONE	NONE
Chr5:8398400-8398649	hyper	7	0	103	0.0455	0.1257	2.7665	NONE	NONE	NONE	NONE	NONE	NONE	AT5G24550-AT5G24560
Chr5:8701050-8701399	hyper	13	1	120	0.0647	0.1748	2.7026	NONE	NONE	NONE	NONE	AT5TE31460|AT5TE31465	DNA/En-Spm;DNA/En-Spm	NONE
Chr5:8715750-8716049	hyper	20	0	102	0.0734	0.2152	2.9314	NONE	NONE	NONE	NONE	NONE	NONE	AT5G25190-AT5G25200
Chr5:8804200-8804599	hyper	16	0	164	0.0165	0.0909	5.5016	AT5G25370	-	protein_coding_gene	Symbols: PLDALPHA3 | phospholipase D alpha 3 | chr5:8804240-8807547 REVERSE LENGTH=820	NONE	NONE	NONE
Chr5:8815200-8815549	hyper	12	0	131	0.0052	0.0622	11.9582	AT5G25380	+	protein_coding_gene	Symbols: CYCA2;1 | cyclin a2;1 | chr5:8815230-8817566 FORWARD LENGTH=437	AT5TE31885	DNA/MuDR	NONE
Chr5:8819200-8819449	hyper	10	0	71	0.0527	0.2016	3.8226	NONE	NONE	NONE	NONE	AT5TE31885|AT5TE31920	DNA/MuDR;RC/Helitron	NONE
Chr5:8846250-8846549	hyper	9	0	95	0.0159	0.1208	7.5783	NONE	NONE	NONE	NONE	AT5TE32020	RC/Helitron	NONE
Chr5:8850450-8850749	hyper	8	0	95	0.0203	0.1101	5.4196	NONE	NONE	NONE	NONE	AT5TE32050	RathE3_cons	NONE
Chr5:8952350-8952799	hyper	27	1	188	0.0497	0.1459	2.9364	AT5G25752	-	protein_coding_gene	Symbols: ATRBL11, RBL11 | rhomboid-like protein 11 | chr5:8951503-8953323 REVERSE LENGTH=280	NONE	NONE	NONE
Chr5:9048450-9048799	hyper	14	0	99	0.0479	0.2204	4.6005	NONE	NONE	NONE	NONE	AT5TE32730	RC/Helitron	NONE
Chr5:9095500-9095799	hyper	10	0	85	0.0334	0.2064	6.1748	NONE	NONE	NONE	NONE	NONE	NONE	AT5G26010-AT5G26030
Chr5:9197800-9198149	hyper	9	0	153	0.0012	0.0343	28.9665	AT5G26250	+	protein_coding_gene	Symbols: | Major facilitator superfamily protein | chr5:9196758-9198681 FORWARD LENGTH=507	NONE	NONE	NONE
Chr5:9357900-9358199	hyper	23	0	138	0.0805	0.215	2.6714	NONE	NONE	NONE	NONE	NONE	NONE	AT5G26610-AT5G26617
Chr5:9380650-9380849	hyper	9	0	63	0.0635	0.2108	3.3178	NONE	NONE	NONE	NONE	AT5TE34020|AT5TE34025|AT5TE34030	DNA/MuDR;DNA/MuDR;RC/Helitron	NONE
Chr5:9417100-9417699	hyper	31	0	188	0.0784	0.3107	3.9626	NONE	NONE	NONE	NONE	NONE	NONE	AT5G26770-AT5G26780
Chr5:9444400-9444649	hyper	10	0	97	0.0258	0.1354	5.2386	NONE	NONE	NONE	NONE	AT5TE34270|AT5TE34275	RC/Helitron;RC/Helitron	NONE
Chr5:9487150-9487499	hyper	26	0	133	0.163	0.3182	1.9519	AT5G26970	-	protein_coding_gene	Symbols: | unknown protein; Has 1807 Blast hits to 1807 proteins in 277 species: Archae - 0; Bacteria - 0; Metazoa - 736; Fungi - 347; Plants - 385; Viruses - 0; Other Eukaryotes - 339 (source: NCBI BLink). | chr5:9487060-9487386 REVERSE LENGTH=108	AT5TE34435|AT5TE34440	RC/Helitron;RC/Helitron	NONE
Chr5:9508500-9508849	hyper	8	0	102	0.0331	0.0791	2.3922	AT5G27020|AT5G27030	+|-	protein_coding_gene|protein_coding_gene	Symbols: | unknown protein; Has 1807 Blast hits to 1807 proteins in 277 species: Archae - 0; Bacteria - 0; Metazoa - 736; Fungi - 347; Plants - 385; Viruses - 0; Other Eukaryotes - 339 (source: NCBI BLink). | chr5:9508187-9508681 FORWARD LENGTH=164;Symbols: TPR3 | TOPLESS-related 3 | chr5:9508913-9515263 REVERSE LENGTH=1108	NONE	NONE	NONE
Chr5:9587600-9587899	hyper	7	2	131	0.0296	0.0632	2.138	AT5G27230	+	protein_coding_gene	Symbols: | Frigida-like protein | chr5:9584255-9587838 FORWARD LENGTH=948	NONE	NONE	NONE
Chr5:9604300-9604949	hyper	18	0	197	0.0208	0.1207	5.7959	AT5G27260	+	protein_coding_gene	Symbols: | unknown protein; BEST Arabidopsis thaliana protein match is: unknown protein (TAIR:AT2G29880.1); Has 1807 Blast hits to 1807 proteins in 277 species: Archae - 0; Bacteria - 0; Metazoa - 736; Fungi - 347; Plants - 385; Viruses - 0; Other Eukaryotes - 339 (source: NCBI BLink). | chr5:9603943-9604930 FORWARD LENGTH=303	NONE	NONE	NONE
Chr5:9615550-9615899	hyper	12	0	134	0.0383	0.12	3.1323	NONE	NONE	NONE	NONE	NONE	NONE	AT5G27270-AT5G27280
Chr5:9713500-9713699	hyper	7	0	84	0.0575	0.1249	2.1715	AT5G27510	+	protein_coding_gene	Symbols: | Protein kinase superfamily protein | chr5:9713173-9714078 FORWARD LENGTH=301	NONE	NONE	NONE
Chr5:9721000-9721349	hyper	12	0	140	0.0554	0.1916	3.4621	AT5G27530	+	protein_coding_gene	Symbols: | Pectin lyase-like superfamily protein | chr5:9717503-9721097 FORWARD LENGTH=458	AT5TE35285	SINE	NONE
Chr5:9828550-9829049	hyper	17	0	216	0.0605	0.132	2.1803	AT5G27750	+	protein_coding_gene	Symbols: | F-box/FBD-like domains containing protein | chr5:9828430-9829981 FORWARD LENGTH=459	NONE	NONE	NONE
Chr5:9900350-9900599	hyper	7	1	98	0.0398	0.1157	2.907	NONE	NONE	NONE	NONE	AT5TE36065	RC/Helitron	NONE
Chr5:9904350-9904599	hyper	9	0	106	0.0225	0.0879	3.9085	AT5G27890	+	protein_coding_gene	Symbols: | BEST Arabidopsis thaliana protein match is: myosin heavy chain-related (TAIR:AT2G15420.1); Has 8 Blast hits to 7 proteins in 1 species: Archae - 0; Bacteria - 0; Metazoa - 0; Fungi - 0; Plants - 8; Viruses - 0; Other Eukaryotes - 0 (source: NCBI BLink). | chr5:9903640-9905347 FORWARD LENGTH=338	NONE	NONE	NONE
Chr1:10006300-10006649	hypo	0	8	158	0.0323	0.0055	5.9165	AT1G28460	+	protein_coding_gene	Symbols: AGL59 | AGAMOUS-like 59 | chr1:10006230-10006778 FORWARD LENGTH=182	NONE	NONE	NONE
Chr1:10108600-10108899	hypo	0	7	113	0.046	0.0096	4.8189	NONE	NONE	NONE	NONE	NONE	NONE	AT1G28815-AT1G28960
Chr1:10144750-10145099	hypo	0	15	109	0.0789	0.0085	9.2373	NONE	NONE	NONE	NONE	NONE	NONE	AT1G29050-AT1G29060
Chr1:10526200-10526499	hypo	0	10	94	0.3916	0.2171	1.8034	NONE	NONE	NONE	NONE	AT1TE34015	RC/Helitron	NONE
Chr1:11588800-11589099	hypo	0	11	128	0.0499	0.0156	3.1991	AT1G32180	-	protein_coding_gene	Symbols: ATCSLD6, CSLD6 | cellulose synthase-like D6 | chr1:11586516-11589651 REVERSE LENGTH=979	NONE	NONE	NONE
Chr1:11736050-11736249	hypo	1	8	48	0.5395	0.2383	2.264	NONE	NONE	NONE	NONE	AT1TE38035	RC/Helitron	NONE
Chr1:11857450-11857749	hypo	0	16	88	0.2882	0.0756	3.815	NONE	NONE	NONE	NONE	NONE	NONE	AT1G32750-AT1G32760
Chr1:11883300-11883499	hypo	0	7	66	0.069	0.008	8.6719	AT1G32810	+	protein_coding_gene	Symbols: | RING/FYVE/PHD zinc finger superfamily protein | chr1:11881810-11885843 FORWARD LENGTH=1068	NONE	NONE	NONE
Chr1:11885000-11885299	hypo	0	11	126	0.1144	0.0497	2.2992	AT1G32810	+	protein_coding_gene	Symbols: | RING/FYVE/PHD zinc finger superfamily protein | chr1:11881810-11885843 FORWARD LENGTH=1068	NONE	NONE	NONE
Chr1:11945000-11945249	hypo	0	7	90	0.0708	0.0023	30.331	NONE	NONE	NONE	NONE	NONE	NONE	AT1G32950-AT1G32960
Chr1:12059800-12059999	hypo	0	8	50	0.5377	0.1662	3.2355	NONE	NONE	NONE	NONE	NONE	NONE	AT1G33250-AT1G33260
Chr1:1214250-1214499	hypo	0	7	122	0.0344	0.006	5.7856	AT1G04470	-	protein_coding_gene	Symbols: | Protein of unknown function (DUF810) | chr1:1211177-1214591 REVERSE LENGTH=1035	NONE	NONE	NONE
Chr1:12587450-12587799	hypo	0	14	134	0.1065	0.0386	2.7569	AT1G34420|AT1G34430	+|-	protein_coding_gene|protein_coding_gene	Symbols: | leucine-rich repeat transmembrane protein kinase family protein | chr1:12584587-12587570 FORWARD LENGTH=966;Symbols: EMB3003 | 2-oxoacid dehydrogenases acyltransferase family protein | chr1:12588027-12590084 REVERSE LENGTH=465	NONE	NONE	NONE
Chr1:12746950-12747249	hypo	0	8	128	0.0558	0.0236	2.361	AT1G34770	+	protein_coding_gene	Symbols: | CONTAINS InterPro DOMAIN/s: MAGE protein (InterPro:IPR002190); Has 1274 Blast hits to 1260 proteins in 85 species: Archae - 0; Bacteria - 0; Metazoa - 1104; Fungi - 45; Plants - 49; Viruses - 0; Other Eukaryotes - 76 (source: NCBI BLink). | chr1:12746624-12748449 FORWARD LENGTH=237	NONE	NONE	NONE
Chr1:12898500-12898849	hypo	0	12	97	0.1843	0.0467	3.95	NONE	NONE	NONE	NONE	AT1TE42010	RC/Helitron	NONE
Chr1:12978950-12979149	hypo	0	7	76	0.0594	0.0014	41.337	AT1G35340	+	protein_coding_gene	Symbols: | ATP-dependent protease La (LON) domain protein | chr1:12977768-12979749 FORWARD LENGTH=316	NONE	NONE	NONE
Chr1:13161250-13161449	hypo	0	7	58	0.2775	0.072	3.8525	NONE	NONE	NONE	NONE	AT1TE42945|AT1TE42950	RC/Helitron;RC/Helitron	NONE
Chr1:13236150-13236399	hypo	0	11	74	0.4863	0.2233	2.1783	NONE	NONE	NONE	NONE	AT1TE43230	RC/Helitron	NONE
Chr1:13342300-13342549	hypo	0	13	58	0.4112	0.1661	2.4749	NONE	NONE	NONE	NONE	AT1TE43610	DNA/MuDR	NONE
Chr1:13477750-13478249	hypo	0	29	193	0.1656	0.0391	4.2382	NONE	NONE	NONE	NONE	NONE	NONE	AT1G36070-AT1G36078
Chr1:13717050-13717249	hypo	0	7	54	0.0782	0.0265	2.9446	NONE	NONE	NONE	NONE	AT1TE44935|AT1TE44940	RC/Helitron;DNA/MuDR	NONE
Chr1:14191450-14191649	hypo	0	7	43	0.3163	0.145	2.1814	NONE	NONE	NONE	NONE	AT1TE46625	DNA/MuDR	NONE
Chr1:14685250-14685599	hypo	0	12	81	0.2093	0.0624	3.3526	NONE	NONE	NONE	NONE	NONE	NONE	AT1G38950-AT1G40083
Chr1:14721100-14721299	hypo	0	8	61	0.1205	0.0596	2.0215	NONE	NONE	NONE	NONE	NONE	NONE	AT1G38950-AT1G40083
Chr1:14886800-14887049	hypo	0	8	79	0.1503	0.0713	2.1085	NONE	NONE	NONE	NONE	NONE	NONE	AT1G38950-AT1G40083
Chr1:14933950-14934149	hypo	1	8	63	0.2712	0.1257	2.1576	NONE	NONE	NONE	NONE	NONE	NONE	AT1G40083-AT1G40087
Chr1:14977700-14977899	hypo	0	9	64	0.1772	0.0742	2.3896	NONE	NONE	NONE	NONE	NONE	NONE	AT1G40083-AT1G40087
Chr1:15019400-15019749	hypo	0	10	107	0.3556	0.119	2.9877	NONE	NONE	NONE	NONE	NONE	NONE	AT1G40087-AT1G40104
Chr1:15036650-15036849	hypo	0	8	63	0.3547	0.1432	2.4763	NONE	NONE	NONE	NONE	NONE	NONE	AT1G40087-AT1G40104
Chr1:15806700-15806899	hypo	0	7	77	0.1835	0.0859	2.1368	NONE	NONE	NONE	NONE	AT1TE52025	LTR/Gypsy	NONE
Chr1:15921700-15921899	hypo	1	7	61	0.381	0.2073	1.8373	NONE	NONE	NONE	NONE	NONE	NONE	AT1G42440-AT1G42470
Chr1:16474550-16474849	hypo	0	12	66	0.4076	0.2021	2.0168	NONE	NONE	NONE	NONE	AT1TE54340	DNA/MuDR	NONE
Chr1:16655700-16655949	hypo	0	8	93	0.0698	0.0337	2.0752	AT1G43900|AT1G43910	+|-	protein_coding_gene|protein_coding_gene	Symbols: | Protein phosphatase 2C family protein | chr1:16654045-16655810 FORWARD LENGTH=371;Symbols: | P-loop containing nucleoside triphosphate hydrolases superfamily protein | chr1:16656050-16657628 REVERSE LENGTH=475	NONE	NONE	NONE
Chr1:16702500-16702749	hypo	1	7	68	0.3117	0.1137	2.7406	NONE	NONE	NONE	NONE	AT1TE55110|AT1TE55115	RC/Helitron;RC/Helitron	NONE
Chr1:16711600-16711899	hypo	0	8	88	0.3707	0.1511	2.4529	NONE	NONE	NONE	NONE	AT1TE55190	RC/Helitron	NONE
Chr1:16914200-16914549	hypo	0	7	136	0.0546	0.0072	7.6284	AT1G44800	-	protein_coding_gene	Symbols: | nodulin MtN21 /EamA-like transporter family protein | chr1:16914342-16916858 REVERSE LENGTH=370	NONE	NONE	NONE
Chr1:17056700-17057599	hypo	0	24	293	0.1	0.0238	4.2091	NONE	NONE	NONE	NONE	AT1TE56445	LTR/Copia	NONE
Chr1:17058350-17059449	hypo	0	57	412	0.1254	0.0362	3.4658	NONE	NONE	NONE	NONE	AT1TE56445	LTR/Copia	NONE
Chr1:17244650-17245049	hypo	0	17	119	0.1023	0.0007	154.023	NONE	NONE	NONE	NONE	NONE	NONE	AT1G46480-AT1G46696
Chr1:1747800-1748049	hypo	0	9	67	0.1134	0.0031	36.5398	NONE	NONE	NONE	NONE	NONE	NONE	AT1G05805-AT1G05810
Chr1:17612800-17613249	hypo	0	23	161	0.053	0.0087	6.0796	AT1G47830	-	protein_coding_gene	Symbols: | SNARE-like superfamily protein | chr1:17613346-17614784 REVERSE LENGTH=142	NONE	NONE	NONE
Chr1:17819600-17819899	hypo	0	9	69	0.1758	0.0536	3.2773	NONE	NONE	NONE	NONE	AT1TE59150|AT1TE59155	RC/Helitron;DNA/MuDR	NONE
Chr1:17820300-17820499	hypo	0	7	51	0.2619	0.1043	2.5121	NONE	NONE	NONE	NONE	AT1TE59155	DNA/MuDR	NONE
Chr1:17899300-17899499	hypo	0	7	55	0.0712	0.0031	22.8034	NONE	NONE	NONE	NONE	AT1TE59405	DNA/MuDR	NONE
Chr1:1792300-1792499	hypo	0	8	85	0.0633	0.0248	2.5548	AT1G05910	+	protein_coding_gene	Symbols: | cell division cycle protein 48-related / CDC48-related | chr1:1790796-1796503 FORWARD LENGTH=1210	NONE	NONE	NONE
Chr1:18047800-18048149	hypo	0	12	94	0.2867	0.1257	2.2804	NONE	NONE	NONE	NONE	NONE	NONE	AT1G48790-AT1G48800
Chr1:18266700-18266999	hypo	0	9	139	0.0711	0.0063	11.2781	AT1G49350	+	protein_coding_gene	Symbols: | pfkB-like carbohydrate kinase family protein | chr1:18265070-18267034 FORWARD LENGTH=378	NONE	NONE	NONE
Chr1:18332900-18333249	hypo	0	15	182	0.0706	0.0041	17.4145	AT1G49530	+	protein_coding_gene	Symbols: GGPS6 | geranylgeranyl pyrophosphate synthase 6 | chr1:18332529-18333539 FORWARD LENGTH=336	NONE	NONE	NONE
Chr1:18515400-18515599	hypo	0	9	75	0.1756	0.0778	2.2575	AT1G50000	-	protein_coding_gene	Symbols: | methyltransferases | chr1:18515183-18517244 REVERSE LENGTH=296	NONE	NONE	NONE
Chr1:18731550-18731899	hypo	0	9	147	0.037	0.0076	4.8589	AT1G50580	+	protein_coding_gene	Symbols: | UDP-Glycosyltransferase superfamily protein | chr1:18730831-18732177 FORWARD LENGTH=448	NONE	NONE	NONE
Chr1:18809450-18809899	hypo	0	15	189	0.067	0.0174	3.8406	AT1G50750	-	protein_coding_gene	Symbols: | Plant mobile domain protein family | chr1:18809184-18812050 REVERSE LENGTH=816	NONE	NONE	NONE
Chr1:19026750-19026999	hypo	0	10	76	0.3552	0.1789	1.986	AT1G51320	+	protein_coding_gene	Symbols: | F-box and associated interaction domains-containing protein | chr1:19025642-19026769 FORWARD LENGTH=375	AT1TE63030	RC/Helitron	NONE
Chr1:19246250-19246549	hypo	0	7	59	0.359	0.0945	3.7984	NONE	NONE	NONE	NONE	AT1TE63785	RC/Helitron	NONE
Chr1:19476600-19476899	hypo	0	8	85	0.0818	0.0285	2.8689	NONE	NONE	NONE	NONE	AT1TE64480	LINE/L1	NONE
Chr1:19556600-19556899	hypo	0	7	140	0.0308	0.0022	13.7945	AT1G52490	-	protein_coding_gene	Symbols: | CONTAINS InterPro DOMAIN/s: F-box domain, cyclin-like (InterPro:IPR001810), F-box domain, Skp2-like (InterPro:IPR022364), F-box associated domain, type 3 (InterPro:IPR013187), F-box associated interaction domain (InterPro:IPR017451); BEST Arabidopsis thaliana protein match is: F-box and associated interaction domains-containing protein (TAIR:AT1G32420.1); Has 1577 Blast hits to 1056 pr…	NONE	NONE	NONE
Chr1:20058200-20058399	hypo	0	12	81	0.117	0.0585	2.0009	AT1G53720	+	protein_coding_gene	Symbols: ATCYP59, CYP59 | cyclophilin 59 | chr1:20057012-20059508 FORWARD LENGTH=506	NONE	NONE	NONE
Chr1:20194600-20194899	hypo	0	13	74	0.2713	0.1235	2.1971	NONE	NONE	NONE	NONE	AT1TE66730|AT1TE66735	DNA;DNA	NONE
Chr1:20217850-20218049	hypo	0	10	79	0.1684	0.0621	2.7116	AT1G54160	-	protein_coding_gene	Symbols: NFYA5, NF-YA5 | nuclear factor Y, subunit A5 | chr1:20217581-20218706 REVERSE LENGTH=308	NONE	NONE	NONE
Chr1:20660750-20660949	hypo	0	7	90	0.062	0.0233	2.6565	AT1G55350	-	protein_coding_gene	Symbols: EMB80, DEK1, EMB1275, ATDEK1 | calpain-type cysteine protease family | chr1:20654463-20664501 REVERSE LENGTH=2151	NONE	NONE	NONE
Chr1:20661300-20661549	hypo	0	9	93	0.0781	0.027	2.8915	AT1G55350	-	protein_coding_gene	Symbols: EMB80, DEK1, EMB1275, ATDEK1 | calpain-type cysteine protease family | chr1:20654463-20664501 REVERSE LENGTH=2151	NONE	NONE	NONE
Chr1:20863500-20863749	hypo	0	11	99	0.0809	0.0023	35.5967	AT1G55810	+	protein_coding_gene	Symbols: UKL3 | uridine kinase-like 3 | chr1:20861273-20864003 FORWARD LENGTH=466	NONE	NONE	NONE
Chr1:20887000-20887199	hypo	0	8	83	0.0943	0.0305	3.0952	AT1G55860	-	protein_coding_gene	Symbols: UPL1 | ubiquitin-protein ligase 1 | chr1:20879900-20895393 REVERSE LENGTH=3930	NONE	NONE	NONE
Chr1:21515850-21516049	hypo	0	7	94	0.109	0.0539	2.0243	AT1G58110	-	protein_coding_gene	Symbols: | Basic-leucine zipper (bZIP) transcription factor family protein | chr1:21515919-21517374 REVERSE LENGTH=374	NONE	NONE	NONE
Chr1:21560250-21560449	hypo	0	9	83	0.1162	0.0466	2.4925	AT1G58220	-	protein_coding_gene	Symbols: | Homeodomain-like superfamily protein | chr1:21558388-21562669 REVERSE LENGTH=834	NONE	NONE	NONE
Chr1:2156800-2157049	hypo	0	10	123	0.1047	0.0448	2.3372	NONE	NONE	NONE	NONE	NONE	NONE	AT1G07020-AT1G07025
Chr1:21984550-21984899	hypo	0	13	150	0.0973	0.0403	2.4153	AT1G59760	-	protein_coding_gene	Symbols: | RNA helicase, ATP-dependent, SK12/DOB1 protein | chr1:21984571-21990110 REVERSE LENGTH=988	NONE	NONE	NONE
Chr1:22029350-22029649	hypo	0	7	141	0.0283	0.006	4.7125	AT1G59840|AT1G59850	+|-	protein_coding_gene|protein_coding_gene	Symbols: CCB4 | cofactor assembly of complex C | chr1:22026569-22028174 FORWARD LENGTH=297;Symbols: | ARM repeat superfamily protein | chr1:22028509-22030207 REVERSE LENGTH=498	NONE	NONE	NONE
Chr1:22219350-22219649	hypo	0	10	99	0.0856	0.0032	26.3399	AT1G60260	-	protein_coding_gene	Symbols: BGLU5 | beta glucosidase 5 | chr1:22218879-22221394 REVERSE LENGTH=478	NONE	NONE	NONE
Chr1:22261400-22261749	hypo	0	20	103	0.2059	0.0296	6.9621	NONE	NONE	NONE	NONE	NONE	NONE	AT1G60410-AT1G60420
Chr1:22539000-22539249	hypo	0	8	104	0.0508	0.0188	2.7087	AT1G61140	-	protein_coding_gene	Symbols: EDA16 | SNF2 domain-containing protein / helicase domain-containing protein / zinc finger protein-related | chr1:22535038-22540610 REVERSE LENGTH=1280	NONE	NONE	NONE
Chr1:22569050-22569249	hypo	0	15	87	0.1089	0.0462	2.3551	AT1G61210	+	protein_coding_gene	Symbols: | Transducin/WD40 repeat-like superfamily protein | chr1:22564785-22571555 FORWARD LENGTH=1181	NONE	NONE	NONE
Chr1:22777150-22777449	hypo	0	9	87	0.1781	0.0866	2.0561	NONE	NONE	NONE	NONE	AT1TE75075	DNA	NONE
Chr1:22928500-22928899	hypo	0	21	113	0.1379	0.0032	42.6848	NONE	NONE	NONE	NONE	NONE	NONE	AT1G62030-AT1G62040
Chr1:23049350-23049699	hypo	0	11	153	0.0385	0.0058	6.6303	AT1G62330	+	protein_coding_gene	Symbols: | O-fucosyltransferase family protein | chr1:23046965-23050053 FORWARD LENGTH=652	NONE	NONE	NONE
Chr1:2387500-2387699	hypo	0	8	84	0.0745	0.034	2.1898	AT1G07710	-	protein_coding_gene	Symbols: | Ankyrin repeat family protein | chr1:2386275-2387986 REVERSE LENGTH=543	NONE	NONE	NONE
Chr1:24063650-24063849	hypo	0	7	53	0.2202	0.0795	2.7707	NONE	NONE	NONE	NONE	NONE	NONE	AT1G64780-AT1G64790
Chr1:24714450-24714699	hypo	0	8	99	0.0835	0.0302	2.7616	AT1G66290	-	protein_coding_gene	Symbols: | F-box/RNI-like superfamily protein | chr1:24713306-24714843 REVERSE LENGTH=453	NONE	NONE	NONE
Chr1:24737200-24737499	hypo	0	9	144	0.0786	0.0257	3.0604	AT1G66340	+	protein_coding_gene	Symbols: ETR1, EIN1, ETR, AtETR1 | Signal transduction histidine kinase, hybrid-type, ethylene sensor | chr1:24734698-24737366 FORWARD LENGTH=738	NONE	NONE	NONE
Chr1:24744950-24745199	hypo	0	9	57	0.5159	0.1852	2.7855	NONE	NONE	NONE	NONE	AT1TE81285	DNA	NONE
Chr1:24870550-24870749	hypo	1	7	80	0.0786	0.0338	2.3282	AT1G66690	-	protein_coding_gene	Symbols: | S-adenosyl-L-methionine-dependent methyltransferases superfamily protein | chr1:24869554-24870798 REVERSE LENGTH=353	NONE	NONE	NONE
Chr1:25082700-25082899	hypo	0	7	74	0.0746	0.0303	2.4623	AT1G67120	-	protein_coding_gene	Symbols: | ATPases;nucleotide binding;ATP binding;nucleoside-triphosphatases;transcription factor binding | chr1:25069727-25095526 REVERSE LENGTH=5393	NONE	NONE	NONE
Chr1:25097950-25098149	hypo	0	8	65	0.3875	0.178	2.1765	NONE	NONE	NONE	NONE	AT1TE82410	RC/Helitron	NONE
Chr1:25454000-25454199	hypo	0	7	80	0.0882	0.0018	48.1071	AT1G67880	-	protein_coding_gene	Symbols: | beta-1,4-N-acetylglucosaminyltransferase family protein | chr1:25454081-25455453 REVERSE LENGTH=390	NONE	NONE	NONE
Chr1:25495900-25496349	hypo	0	22	114	0.17	0.0192	8.8524	AT1G68010	+	protein_coding_gene	Symbols: HPR, ATHPR1 | hydroxypyruvate reductase | chr1:25493418-25495720 FORWARD LENGTH=386	AT1TE83640	RC/Helitron	NONE
Chr1:25660250-25660649	hypo	1	37	120	0.3127	0.0538	5.8108	NONE	NONE	NONE	NONE	NONE	NONE	AT1G68440-AT1G68450
Chr1:25698250-25698499	hypo	0	11	58	0.3529	0.1656	2.1307	NONE	NONE	NONE	NONE	AT1TE84245	DNA/Harbinger	NONE
Chr1:25773300-25773599	hypo	0	9	79	0.0868	0.0042	20.8219	NONE	NONE	NONE	NONE	NONE	NONE	AT1G68640-AT1G68650
Chr1:26034400-26034599	hypo	0	9	79	0.0678	0.0034	20.1022	AT1G69250	+	protein_coding_gene	Symbols: | Nuclear transport factor 2 (NTF2) family protein with RNA binding (RRM-RBD-RNP motifs) domain | chr1:26033163-26035301 FORWARD LENGTH=427	AT1TE85290	RC/Helitron	NONE
Chr1:27252850-27253049	hypo	0	12	86	0.1235	0.0544	2.2681	AT1G72410	-	protein_coding_gene	Symbols: | COP1-interacting protein-related | chr1:27251949-27256246 REVERSE LENGTH=1163	NONE	NONE	NONE
Chr1:2728350-2728549	hypo	0	7	80	0.0693	0.0223	3.1038	AT1G08600	+	protein_coding_gene	Symbols: ATRX, CHR20 | P-loop containing nucleoside triphosphate hydrolases superfamily protein | chr1:2724562-2733431 FORWARD LENGTH=1458	NONE	NONE	NONE
Chr1:27482300-27482649	hypo	0	18	146	0.0476	0.0167	2.8463	AT1G73066	+	protein_coding_gene	Symbols: | Leucine-rich repeat family protein | chr1:27481785-27483581 FORWARD LENGTH=598	NONE	NONE	NONE
Chr1:27540000-27540199	hypo	0	7	76	0.105	0.0452	2.3224	AT1G73220	+	protein_coding_gene	Symbols: AtOCT1, 1-Oct | organic cation/carnitine transporter1 | chr1:27538387-27540109 FORWARD LENGTH=539	NONE	NONE	NONE
Chr1:27606150-27606449	hypo	0	11	112	0.1468	0.051	2.8799	AT1G73430	+	protein_coding_gene	Symbols: | sec34-like family protein | chr1:27604096-27610829 FORWARD LENGTH=784	NONE	NONE	NONE
Chr1:28088050-28088249	hypo	0	8	89	0.0354	0.0043	8.2363	AT1G74750	+	protein_coding_gene	Symbols: | Pentatricopeptide repeat (PPR) superfamily protein | chr1:28086800-28089367 FORWARD LENGTH=855	NONE	NONE	NONE
Chr1:28908550-28908849	hypo	0	16	138	0.0655	0.0183	3.5855	AT1G76950	+	protein_coding_gene	Symbols: PRAF1 | Regulator of chromosome condensation (RCC1) family with FYVE zinc finger domain | chr1:28906952-28911325 FORWARD LENGTH=1103	NONE	NONE	NONE
Chr1:29019000-29019299	hypo	0	9	146	0.0425	0.0068	6.2075	AT1G77230|AT1G77240	+|-	protein_coding_gene|protein_coding_gene	Symbols: | Tetratricopeptide repeat (TPR)-like superfamily protein | chr1:29016129-29017873 FORWARD LENGTH=218;Symbols: | AMP-dependent synthetase and ligase family protein | chr1:29017958-29019595 REVERSE LENGTH=545	NONE	NONE	NONE
Chr1:29054050-29054249	hypo	0	8	83	0.134	0.0598	2.2418	AT1G77310	+	protein_coding_gene	Symbols: | BEST Arabidopsis thaliana protein match is: wound-responsive family protein (TAIR:AT1G21610.1); Has 493 Blast hits to 482 proteins in 163 species: Archae - 0; Bacteria - 100; Metazoa - 172; Fungi - 66; Plants - 65; Viruses - 7; Other Eukaryotes - 83 (source: NCBI BLink). | chr1:29051671-29056179 FORWARD LENGTH=717	NONE	NONE	NONE
Chr1:29194250-29194599	hypo	0	19	158	0.0893	0.0368	2.428	AT1G77680	-	protein_coding_gene	Symbols: | Ribonuclease II/R family protein | chr1:29192188-29195963 REVERSE LENGTH=1055	NONE	NONE	NONE
Chr1:29409000-29409299	hypo	0	7	111	0.0273	0.0047	5.8064	AT1G78160	+	protein_coding_gene	Symbols: APUM7, PUM7 | pumilio 7 | chr1:29407900-29410184 FORWARD LENGTH=650	NONE	NONE	NONE
Chr1:29523200-29523549	hypo	0	12	83	0.3565	0.0796	4.4786	NONE	NONE	NONE	NONE	AT1TE96570	RC/Helitron	NONE
Chr1:3620850-3621099	hypo	0	7	91	0.0394	0.0056	7.0311	AT1G10870	-	protein_coding_gene	Symbols: AGD4 | ARF-GAP domain 4 | chr1:3616905-3623612 REVERSE LENGTH=775	NONE	NONE	NONE
Chr1:4093350-4093599	hypo	0	7	65	0.5396	0.2614	2.0642	NONE	NONE	NONE	NONE	AT1TE13310	RC/Helitron	NONE
Chr1:4385250-4385499	hypo	0	7	110	0.0154	0.0033	4.68	AT1G12860	+	protein_coding_gene	Symbols: SCRM2, ICE2 | basic helix-loop-helix (bHLH) DNA-binding superfamily protein | chr1:4384758-4386392 FORWARD LENGTH=450	NONE	NONE	NONE
Chr1:4455200-4455549	hypo	0	12	124	0.0371	0.0044	8.3756	NONE	NONE	NONE	NONE	NONE	NONE	AT1G13060-AT1G13080
Chr1:447250-447599	hypo	0	12	84	0.1108	0.0201	5.5047	NONE	NONE	NONE	NONE	NONE	NONE	AT1G02270-AT1G02280
Chr1:5432300-5432899	hypo	0	40	276	0.0834	0.0396	2.106	AT1G15780	-	protein_coding_gene	Symbols: | unknown protein; BEST Arabidopsis thaliana protein match is: unknown protein (TAIR:AT2G10440.1); Has 103701 Blast hits to 43153 proteins in 1828 species: Archae - 30; Bacteria - 7385; Metazoa - 38639; Fungi - 11531; Plants - 7727; Viruses - 307; Other Eukaryotes - 38082 (source: NCBI BLink). | chr1:5430446-5435921 REVERSE LENGTH=1335	NONE	NONE	NONE
Chr1:5444350-5444799	hypo	0	29	204	0.039	0.0043	8.9748	AT1G15810	+	protein_coding_gene	Symbols: | S15/NS1, RNA-binding protein | chr1:5444496-5446271 FORWARD LENGTH=419	NONE	NONE	NONE
Chr1:5717500-5717699	hypo	0	10	82	0.0713	0.0287	2.487	AT1G16710	+	protein_coding_gene	Symbols: HAC12 | histone acetyltransferase of the CBP family 12 | chr1:5714692-5721782 FORWARD LENGTH=1706	NONE	NONE	NONE
Chr1:5994600-5994899	hypo	2	27	132	0.0859	0.0415	2.0691	AT1G17450	-	protein_coding_gene	Symbols: | B-block binding subunit of TFIIIC | chr1:5988643-5996693 REVERSE LENGTH=1753	NONE	NONE	NONE
Chr1:6056400-6056699	hypo	1	7	126	0.0397	0.0116	3.4265	AT1G17600	-	protein_coding_gene	Symbols: | Disease resistance protein (TIR-NBS-LRR class) family | chr1:6053026-6056572 REVERSE LENGTH=1049	NONE	NONE	NONE
Chr1:612500-612799	hypo	0	8	67	0.1769	0.0087	20.3654	NONE	NONE	NONE	NONE	NONE	NONE	AT1G02790-AT1G02800
Chr1:6130250-6130549	hypo	0	12	93	0.1569	0.006	26.0498	AT1G17810	+	protein_coding_gene	Symbols: BETA-TIP | beta-tonoplast intrinsic protein | chr1:6130209-6131442 FORWARD LENGTH=267	NONE	NONE	NONE
Chr1:6134700-6135049	hypo	0	17	134	0.0353	0.003	11.8935	AT1G17820	-	protein_coding_gene	Symbols: | Putative integral membrane protein conserved region (DUF2404) | chr1:6131751-6135115 REVERSE LENGTH=803	NONE	NONE	NONE
Chr1:6721400-6721749	hypo	0	14	128	0.1092	0.007	15.5542	NONE	NONE	NONE	NONE	NONE	NONE	AT1G19410-AT1G19430
Chr1:6903500-6903799	hypo	0	8	109	0.0385	0.0039	9.9371	AT1G19880	-	protein_coding_gene	Symbols: | Regulator of chromosome condensation (RCC1) family protein | chr1:6900648-6903818 REVERSE LENGTH=538	NONE	NONE	NONE
Chr1:7149350-7149649	hypo	0	7	119	0.077	0.0268	2.8708	AT1G20630	+	protein_coding_gene	Symbols: CAT1 | catalase 1 | chr1:7146812-7149609 FORWARD LENGTH=492	NONE	NONE	NONE
Chr1:7424850-7425049	hypo	0	7	89	0.0639	0.0225	2.84	AT1G21210	+	protein_coding_gene	Symbols: WAK4 | wall associated kinase 4 | chr1:7424653-7427041 FORWARD LENGTH=738	NONE	NONE	NONE
Chr1:7475050-7475399	hypo	0	13	149	0.0784	0.0226	3.4675	NONE	NONE	NONE	NONE	AT1TE24060	LINE/L1	NONE
Chr1:7877050-7877349	hypo	0	7	113	0.0552	0.0026	21.4154	AT1G22290	-	protein_coding_gene	Symbols: | 14-3-3 family protein | chr1:7876966-7877915 REVERSE LENGTH=196	NONE	NONE	NONE
Chr1:8495100-8495449	hypo	0	10	88	0.322	0.1131	2.8482	NONE	NONE	NONE	NONE	NONE	NONE	AT1G23980-AT1G24000
Chr1:876400-876599	hypo	0	7	91	0.0613	0.0064	9.5467	AT1G03510	-	protein_coding_gene	Symbols: | Tetratricopeptide repeat (TPR)-like superfamily protein | chr1:876258-877547 REVERSE LENGTH=429	NONE	NONE	NONE
Chr1:9202950-9203199	hypo	0	9	65	0.263	0.0079	33.487	NONE	NONE	NONE	NONE	NONE	NONE	AT1G26620-AT1G26630
Chr1:9374750-9375149	hypo	0	20	147	0.1291	0.0537	2.4035	AT1G27000	+	protein_coding_gene	Symbols: | Protein of unknown function (DUF1664) | chr1:9374068-9376422 FORWARD LENGTH=304	NONE	NONE	NONE
Chr1:9384350-9384549	hypo	0	7	39	0.9643	0.3537	2.7266	NONE	NONE	NONE	NONE	AT1TE30240	RC/Helitron	NONE
Chr1:9384850-9385149	hypo	0	8	62	0.3402	0.1165	2.9202	NONE	NONE	NONE	NONE	AT1TE30240|AT1TE30245	RC/Helitron;RC/Helitron	NONE
Chr1:9596550-9596799	hypo	0	9	109	0.0569	0.0236	2.4139	AT1G27595	+	protein_coding_gene	Symbols: | CONTAINS InterPro DOMAIN/s: Symplekin tight junction protein C-terminal (InterPro:IPR022075); BEST Arabidopsis thaliana protein match is: HEAT repeat-containing protein (TAIR:AT5G01400.1); Has 593 Blast hits to 297 proteins in 111 species: Archae - 0; Bacteria - 3; Metazoa - 139; Fungi - 49; Plants - 57; Viruses - 0; Other Eukaryotes - 345 (source: NCBI BLink). | chr1:9596475-9602917 F…	NONE	NONE	NONE
Chr1:9741000-9741399	hypo	0	14	128	0.07	0.0036	19.45	AT1G27950	+	protein_coding_gene	Symbols: LTPG1 | glycosylphosphatidylinositol-anchored lipid protein transfer 1 | chr1:9740740-9741991 FORWARD LENGTH=193	NONE	NONE	NONE
Chr1:9879600-9879999	hypo	0	17	102	0.184	0.0049	37.8349	NONE	NONE	NONE	NONE	NONE	NONE	AT1G28260-AT1G28270
Chr1:9929150-9929349	hypo	0	8	73	0.1878	0.0878	2.1398	NONE	NONE	NONE	NONE	AT1TE32015	LTR/Copia	NONE
Chr1:9958600-9958849	hypo	0	12	63	0.6467	0.2516	2.57	NONE	NONE	NONE	NONE	AT1TE32110|AT1TE32115	RC/Helitron;RC/Helitron	NONE
Chr2:10186300-10186649	hypo	0	9	144	0.1304	0.063	2.0704	AT2G23945	-	protein_coding_gene	Symbols: | Eukaryotic aspartyl protease family protein | chr2:10185229-10186605 REVERSE LENGTH=458	NONE	NONE	NONE
Chr2:10231950-10232249	hypo	1	13	115	0.0969	0.0342	2.8309	AT2G24070	-	protein_coding_gene	Symbols: QWRF4 | Family of unknown function (DUF566) | chr2:10231822-10233986 REVERSE LENGTH=609	NONE	NONE	NONE
Chr2:10233100-10233299	hypo	0	7	75	0.0991	0.042	2.3578	AT2G24070	-	protein_coding_gene	Symbols: QWRF4 | Family of unknown function (DUF566) | chr2:10231822-10233986 REVERSE LENGTH=609	NONE	NONE	NONE
Chr2:10417600-10417949	hypo	0	17	154	0.1432	0.0594	2.4104	AT2G24520	+	protein_coding_gene	Symbols: AHA5, HA5 | H(+)-ATPase 5 | chr2:10415522-10419730 FORWARD LENGTH=931	NONE	NONE	NONE
Chr2:10467450-10467699	hypo	0	11	68	0.5131	0.2339	2.1933	NONE	NONE	NONE	NONE	AT2TE44900|AT2TE44905|AT2TE44910	RC/Helitron;RC/Helitron;DNA/HAT	NONE
Chr2:10468200-10468399	hypo	0	10	52	0.5055	0.2392	2.1129	AT2G24625	+	protein_coding_gene	Symbols: | Defensin-like (DEFL) family protein | chr2:10468340-10469286 FORWARD LENGTH=88	AT2TE44910|AT2TE44915	DNA/HAT;RC/Helitron	NONE
Chr2:1050050-1050249	hypo	1	8	35	0.4219	0.1924	2.1926	NONE	NONE	NONE	NONE	NONE	NONE	AT2G03470-AT2G03480
Chr2:10544300-10544599	hypo	0	10	125	0.0834	0.0068	12.3057	NONE	NONE	NONE	NONE	NONE	NONE	AT2G24740-AT2G24762
Chr2:10618300-10618499	hypo	0	7	90	0.0591	0.0212	2.7866	AT2G24960	+	protein_coding_gene	Symbols: | unknown protein; BEST Arabidopsis thaliana protein match is: unknown protein (TAIR:AT4G02210.2); Has 1453 Blast hits to 509 proteins in 26 species: Archae - 0; Bacteria - 0; Metazoa - 1; Fungi - 39; Plants - 1363; Viruses - 0; Other Eukaryotes - 50 (source: NCBI BLink). | chr2:10617263-10620034 FORWARD LENGTH=797	NONE	NONE	NONE
Chr2:10657750-10659049	hypo	1	95	509	0.1995	0.0847	2.3543	AT2G25050	-	protein_coding_gene	Symbols: | Actin-binding FH2 (Formin Homology) protein | chr2:10654108-10659383 REVERSE LENGTH=1111	NONE	NONE	NONE
Chr2:10692250-10692449	hypo	0	7	74	0.1768	0.0043	40.7691	NONE	NONE	NONE	NONE	NONE	NONE	AT2G25120-AT2G25130
Chr2:10745700-10746149	hypo	0	19	95	0.1169	0.004	29.3084	NONE	NONE	NONE	NONE	AT2TE46110	DNA	NONE
Chr2:10882850-10883049	hypo	0	9	78	0.0515	0.0124	4.1383	AT2G25560	+	protein_coding_gene	Symbols: | DNAJ heat shock N-terminal domain-containing protein | chr2:10881790-10883760 FORWARD LENGTH=656	NONE	NONE	NONE
Chr2:10962300-10962499	hypo	0	9	85	0.1103	0.0538	2.0505	AT2G25730	-	protein_coding_gene	Symbols: | unknown protein; Has 157 Blast hits to 144 proteins in 62 species: Archae - 0; Bacteria - 0; Metazoa - 101; Fungi - 0; Plants - 35; Viruses - 0; Other Eukaryotes - 21 (source: NCBI BLink). | chr2:10956751-10972729 REVERSE LENGTH=2464	NONE	NONE	NONE
Chr2:10971150-10971399	hypo	0	9	91	0.1261	0.0561	2.2467	AT2G25730	-	protein_coding_gene	Symbols: | unknown protein; Has 157 Blast hits to 144 proteins in 62 species: Archae - 0; Bacteria - 0; Metazoa - 101; Fungi - 0; Plants - 35; Viruses - 0; Other Eukaryotes - 21 (source: NCBI BLink). | chr2:10956751-10972729 REVERSE LENGTH=2464	NONE	NONE	NONE
Chr2:11032950-11033149	hypo	0	8	85	0.1708	0.083	2.0574	AT2G25870	+	protein_coding_gene	Symbols: | haloacid dehalogenase-like hydrolase family protein | chr2:11031159-11034302 FORWARD LENGTH=584	NONE	NONE	NONE
Chr2:11133350-11133549	hypo	0	7	88	0.1181	0.0438	2.6971	AT2G26140	-	protein_coding_gene	Symbols: ftsh4 | FTSH protease 4 | chr2:11131939-11135126 REVERSE LENGTH=717	NONE	NONE	NONE
Chr2:11183450-11183649	hypo	0	9	46	0.4441	0.1956	2.2703	NONE	NONE	NONE	NONE	AT2TE48300	LINE/L1	NONE
Chr2:11217550-11217849	hypo	0	10	123	0.0351	0.0077	4.5752	AT2G26350	-	protein_coding_gene	Symbols: PEX10, ATPEX10 | peroxin 10 | chr2:11217767-11220415 REVERSE LENGTH=381	NONE	NONE	NONE
Chr2:11243350-11243599	hypo	0	7	99	0.0976	0.0459	2.1253	AT2G26430	-	protein_coding_gene	Symbols: RCY1, ATRCY1 | arginine-rich cyclin 1 | chr2:11243433-11245504 REVERSE LENGTH=416	NONE	NONE	NONE
Chr2:12012350-12012649	hypo	0	7	122	0.0473	0.0039	12.1202	AT2G28180	-	protein_coding_gene	Symbols: ATCHX8, CHX8, CHX08 | Cation/hydrogen exchanger family protein | chr2:12010994-12013832 REVERSE LENGTH=847	NONE	NONE	NONE
Chr2:12067900-12068149	hypo	0	16	110	0.0954	0.0483	1.9756	AT2G28290	+	protein_coding_gene	Symbols: SYD, CHR3 | P-loop containing nucleoside triphosphate hydrolases superfamily protein | chr2:12056771-12072950 FORWARD LENGTH=3574	NONE	NONE	NONE
Chr2:12134850-12135049	hypo	0	7	72	0.0304	0.0058	5.2042	AT2G28380	-	protein_coding_gene	Symbols: DRB2 | dsRNA-binding protein 2 | chr2:12134098-12135915 REVERSE LENGTH=434	NONE	NONE	NONE
Chr2:12221350-12221549	hypo	0	7	81	0.1105	0.0273	4.0472	AT2G28540	+	protein_coding_gene	Symbols: | RNA binding (RRM/RBD/RNP motifs) family protein | chr2:12218652-12223446 FORWARD LENGTH=882	NONE	NONE	NONE
Chr2:12410000-12410199	hypo	0	10	32	0.4452	0.1481	3.0048	NONE	NONE	NONE	NONE	NONE	NONE	AT2G28890-AT2G28900
Chr2:12656450-12656749	hypo	0	10	115	0.1015	0.0235	4.3117	AT2G29600	+	protein_coding_gene	Symbols: | Galactose oxidase/kelch repeat superfamily protein | chr2:12655661-12656908 FORWARD LENGTH=415	NONE	NONE	NONE
Chr2:12673600-12673899	hypo	0	11	118	0.107	0.0441	2.4279	AT2G29650	-	protein_coding_gene	Symbols: ANTR1, PHT4;1 | phosphate transporter 4;1 | chr2:12673685-12676003 REVERSE LENGTH=512	NONE	NONE	NONE
Chr2:12876800-12876999	hypo	0	7	23	0.424	0.2091	2.0276	NONE	NONE	NONE	NONE	AT2TE56340	RC/Helitron	NONE
Chr2:12911250-12911449	hypo	0	9	76	0.0656	0.0134	4.8945	AT2G30280	-	protein_coding_gene	Symbols: RDM4, DMS4 | RNA-directed DNA methylation 4 | chr2:12909804-12911860 REVERSE LENGTH=346	NONE	NONE	NONE
Chr2:12991800-12992099	hypo	0	11	105	0.1059	0.038	2.7858	AT2G30480	-	protein_coding_gene	Symbols: | unknown protein; Has 35333 Blast hits to 34131 proteins in 2444 species: Archae - 798; Bacteria - 22429; Metazoa - 974; Fungi - 991; Plants - 531; Viruses - 0; Other Eukaryotes - 9610 (source: NCBI BLink). | chr2:12988326-12992279 REVERSE LENGTH=621	NONE	NONE	NONE
Chr2:13122200-13122499	hypo	0	11	125	0.0486	0.0192	2.5342	AT2G30800	-	protein_coding_gene	Symbols: HVT1, ATVT-1 | helicase in vascular tissue and tapetum | chr2:13120585-13126635 REVERSE LENGTH=1299	NONE	NONE	NONE
Chr2:13123050-13123449	hypo	0	17	168	0.0929	0.0385	2.413	AT2G30800	-	protein_coding_gene	Symbols: HVT1, ATVT-1 | helicase in vascular tissue and tapetum | chr2:13120585-13126635 REVERSE LENGTH=1299	NONE	NONE	NONE
Chr2:13447600-13447849	hypo	0	7	108	0.0479	0.0037	13.0471	AT2G31590	-	protein_coding_gene	Symbols: | unknown protein; BEST Arabidopsis thaliana protein match is: unknown protein (TAIR:AT4G04730.1); Has 30 Blast hits to 30 proteins in 3 species: Archae - 0; Bacteria - 0; Metazoa - 0; Fungi - 0; Plants - 29; Viruses - 0; Other Eukaryotes - 1 (source: NCBI BLink). | chr2:13446829-13448133 REVERSE LENGTH=240	NONE	NONE	NONE
Chr2:13634150-13634349	hypo	0	10	52	0.5683	0.2472	2.2991	NONE	NONE	NONE	NONE	AT2TE59995	RC/Helitron	NONE
Chr2:13686800-13686999	hypo	0	7	60	0.0499	0.0154	3.2335	AT2G32240	-	protein_coding_gene	Symbols: | FUNCTIONS IN: molecular_function unknown; INVOLVED IN: response to cadmium ion; LOCATED IN: plasma membrane; EXPRESSED IN: 25 plant structures; EXPRESSED DURING: 13 growth stages; CONTAINS InterPro DOMAIN/s: Prefoldin (InterPro:IPR009053); BEST Arabidopsis thaliana protein match is: unknown protein (TAIR:AT1G05320.3); Has 470429 Blast hits to 168274 proteins in 4282 species: Archae - 6…	NONE	NONE	NONE
Chr2:13886100-13886299	hypo	0	9	39	0.4948	0.1936	2.5557	NONE	NONE	NONE	NONE	AT2TE61215	RC/Helitron	NONE
Chr2:13935900-13936149	hypo	0	7	106	0.0757	0.0353	2.1421	AT2G32850	-	protein_coding_gene	Symbols: | Protein kinase superfamily protein | chr2:13935448-13937977 REVERSE LENGTH=650	NONE	NONE	NONE
Chr2:14250500-14250699	hypo	0	9	77	0.0702	0.0334	2.0996	AT2G33680	+	protein_coding_gene	Symbols: | Tetratricopeptide repeat (TPR)-like superfamily protein | chr2:14249608-14251791 FORWARD LENGTH=727	NONE	NONE	NONE
Chr2:14312500-14312699	hypo	0	8	83	0.1304	0.0614	2.1238	AT2G33835	-	protein_coding_gene	Symbols: FES1 | Zinc finger C-x8-C-x5-C-x3-H type family protein | chr2:14312145-14314566 REVERSE LENGTH=587	NONE	NONE	NONE
Chr2:14313000-14313199	hypo	0	7	90	0.0668	0.0252	2.6513	AT2G33835	-	protein_coding_gene	Symbols: FES1 | Zinc finger C-x8-C-x5-C-x3-H type family protein | chr2:14312145-14314566 REVERSE LENGTH=587	NONE	NONE	NONE
Chr2:1450800-1450999	hypo	0	7	66	0.0721	0.0315	2.2841	AT2G04235	+	protein_coding_gene	Symbols: | unknown protein; FUNCTIONS IN: molecular_function unknown; INVOLVED IN: biological_process unknown; LOCATED IN: cellular_component unknown; EXPRESSED IN: cultured cell; Has 713 Blast hits to 345 proteins in 122 species: Archae - 2; Bacteria - 262; Metazoa - 138; Fungi - 55; Plants - 39; Viruses - 0; Other Eukaryotes - 217 (source: NCBI BLink). | chr2:1449414-1455018 FORWARD LENGTH=1253	NONE	NONE	NONE
Chr2:14623700-14623899	hypo	1	8	68	0.1098	0.0513	2.1386	AT2G34680	-	protein_coding_gene	Symbols: AIR9 | Outer arm dynein light chain 1 protein | chr2:14616947-14628300 REVERSE LENGTH=1708	NONE	NONE	NONE
Chr2:14828850-14829049	hypo	0	7	80	0.0357	0.0057	6.309	AT2G35170	+	protein_coding_gene	Symbols: | Histone H3 K4-specific methyltransferase SET7/9 family protein | chr2:14827615-14829605 FORWARD LENGTH=484	NONE	NONE	NONE
Chr2:15026300-15026599	hypo	0	8	114	0.0521	0.0133	3.9097	AT2G35740	-	protein_coding_gene	Symbols: ATINT3, INT3 | nositol transporter 3 | chr2:15024489-15026414 REVERSE LENGTH=580	NONE	NONE	NONE
Chr2:15308850-15309049	hypo	0	9	83	0.1396	0.0442	3.1598	AT2G36490	-	protein_coding_gene	Symbols: DML1, ROS1 | demeter-like 1 | chr2:15308259-15314272 REVERSE LENGTH=1393	NONE	NONE	NONE
Chr2:15354200-15354599	hypo	0	18	159	0.0896	0.0056	15.8822	AT2G36630	-	protein_coding_gene	Symbols: | Sulfite exporter TauE/SafE family protein | chr2:15352767-15355050 REVERSE LENGTH=459	NONE	NONE	NONE
Chr2:15385150-15385449	hypo	1	10	125	0.0773	0.03	2.5796	AT2G36700	-	protein_coding_gene	Symbols: | Pectin lyase-like superfamily protein | chr2:15384706-15386421 REVERSE LENGTH=333	NONE	NONE	NONE
Chr2:15626150-15626499	hypo	0	11	117	0.049	0.0063	7.7504	AT2G37210	-	protein_coding_gene	Symbols: | lysine decarboxylase family protein | chr2:15624253-15626834 REVERSE LENGTH=215	NONE	NONE	NONE
Chr2:1628000-1628399	hypo	0	14	146	0.1135	0.0499	2.2732	AT2G04660	+	protein_coding_gene	Symbols: APC2 | anaphase-promoting complex/cyclosome 2 | chr2:1624933-1629039 FORWARD LENGTH=865	NONE	NONE	NONE
Chr2:16355400-16355599	hypo	0	7	82	0.081	0.0365	2.2213	AT2G39190	+	protein_coding_gene	Symbols: ATATH8 | Protein kinase superfamily protein | chr2:16350140-16352680 FORWARD LENGTH=374	NONE	NONE	NONE
Chr2:16458300-16458599	hypo	0	11	88	0.0682	0.0053	12.7585	NONE	NONE	NONE	NONE	NONE	NONE	AT2G39410-AT2G39415
Chr2:1659800-1660149	hypo	0	8	130	0.0843	0.0166	5.0841	AT2G04750	-	protein_coding_gene	Symbols: | Actin binding Calponin homology (CH) domain-containing protein | chr2:1659762-1662748 REVERSE LENGTH=652	NONE	NONE	NONE
Chr2:16631800-16632049	hypo	1	7	114	0.1021	0.0497	2.0534	AT2G39850	+	protein_coding_gene	Symbols: | Subtilisin-like serine endopeptidase family protein | chr2:16630626-16634100 FORWARD LENGTH=775	NONE	NONE	NONE
Chr2:16718500-16718949	hypo	0	18	177	0.085	0.0265	3.2064	AT2G40030	+	protein_coding_gene	Symbols: NRPD1B, DRD3, ATNRPD1B, DMS5, NRPE1 | nuclear RNA polymerase D1B | chr2:16715089-16723406 FORWARD LENGTH=1976	NONE	NONE	NONE
Chr2:16742600-16742849	hypo	0	7	55	0.181	0.0057	31.9526	NONE	NONE	NONE	NONE	AT2TE75295	DNA/MuDR	NONE
Chr2:17118750-17119049	hypo	0	10	114	0.0508	0.0038	13.3135	AT2G41020	+	protein_coding_gene	Symbols: | WW domain-containing protein | chr2:17117425-17120901 FORWARD LENGTH=463	NONE	NONE	NONE
Chr2:1719700-1719899	hypo	0	7	85	0.139	0.0687	2.0227	AT2G04880	+	protein_coding_gene	Symbols: ZAP1, ATWRKY1, WRKY1 | zinc-dependent activator protein-1 | chr2:1718557-1720219 FORWARD LENGTH=487	NONE	NONE	NONE
Chr2:1721300-1721599	hypo	0	11	129	0.1643	0.0864	1.902	AT2G04890	-	protein_coding_gene	Symbols: SCL21 | SCARECROW-like 21 | chr2:1720575-1721816 REVERSE LENGTH=413	NONE	NONE	NONE
Chr2:17330800-17331199	hypo	0	15	147	0.04	0.007	5.7218	AT2G41550	-	protein_coding_gene	Symbols: | Rho termination factor | chr2:17329086-17330830 REVERSE LENGTH=475	NONE	NONE	NONE
Chr2:18434050-18434299	hypo	0	10	100	0.0978	0.0461	2.1218	AT2G44710	+	protein_coding_gene	Symbols: | RNA-binding (RRM/RBD/RNP motifs) family protein | chr2:18432902-18436629 FORWARD LENGTH=809	NONE	NONE	NONE
Chr2:19118700-19118999	hypo	0	9	125	0.0648	0.0268	2.4206	AT2G46560	-	protein_coding_gene	Symbols: | transducin family protein / WD-40 repeat family protein | chr2:19115570-19125856 REVERSE LENGTH=2513	NONE	NONE	NONE
Chr2:19269050-19269299	hypo	1	11	67	0.3883	0.1773	2.1904	NONE	NONE	NONE	NONE	AT2TE87760|AT2TE87765	RC/Helitron;RC/Helitron	NONE
Chr2:19279700-19279999	hypo	0	16	132	0.0812	0.0382	2.1246	AT2G46920	-	protein_coding_gene	Symbols: POL | Protein phosphatase 2C family protein | chr2:19278106-19280921 REVERSE LENGTH=856	NONE	NONE	NONE
Chr2:19354100-19354299	hypo	0	7	54	0.1596	0.0596	2.6791	NONE	NONE	NONE	NONE	NONE	NONE	AT2G47150-AT2G47160
Chr2:1953950-1954349	hypo	1	16	170	0.1738	0.0841	2.0668	AT2G05350	+	protein_coding_gene	Symbols: | unknown protein; Has 22 Blast hits to 16 proteins in 5 species: Archae - 0; Bacteria - 0; Metazoa - 0; Fungi - 0; Plants - 22; Viruses - 0; Other Eukaryotes - 0 (source: NCBI BLink). | chr2:1950455-1954740 FORWARD LENGTH=453	NONE	NONE	NONE
Chr2:1954800-1955249	hypo	0	25	118	0.2404	0.0056	42.7106	NONE	NONE	NONE	NONE	AT2TE09010	DNA/MuDR	NONE
Chr2:1968150-1968599	hypo	0	32	148	0.252	0.0712	3.5383	NONE	NONE	NONE	NONE	AT2TE09085	DNA/HAT	NONE
Chr2:19683300-19683649	hypo	0	14	111	0.1596	0.0452	3.5291	NONE	NONE	NONE	NONE	NONE	NONE	AT2G48121-AT2G48130
Chr2:2019100-2019399	hypo	0	9	81	0.2362	0.0803	2.9423	NONE	NONE	NONE	NONE	AT2TE09260	RC/Helitron	NONE
Chr2:2024650-2025099	hypo	0	34	123	0.3722	0.01	37.2003	NONE	NONE	NONE	NONE	AT2TE09290|AT2TE09295	RC/Helitron;RC/Helitron	NONE
Chr2:2144400-2144599	hypo	0	7	72	0.0798	0.0268	2.9811	AT2G05710	+	protein_coding_gene	Symbols: ACO3 | aconitase 3 | chr2:2141591-2146350 FORWARD LENGTH=990	NONE	NONE	NONE
Chr2:2541250-2541449	hypo	0	7	43	0.3886	0.17	2.2865	NONE	NONE	NONE	NONE	AT2TE11500	DNA/MuDR	NONE
Chr2:2960000-2960299	hypo	0	7	102	0.0382	0.0019	20.3076	NONE	NONE	NONE	NONE	NONE	NONE	AT2G07140-AT2G07170
Chr2:306100-306399	hypo	0	10	81	0.1119	0.0053	20.9172	AT2G01680	+	protein_coding_gene	Symbols: | Ankyrin repeat family protein | chr2:306597-308427 FORWARD LENGTH=532	NONE	NONE	NONE
Chr2:3283800-3283999	hypo	0	13	67	0.3099	0.1423	2.1768	NONE	NONE	NONE	NONE	NONE	NONE	AT2G07680-AT2G07681
Chr2:3293000-3293199	hypo	0	7	89	0.2404	0.1123	2.1408	NONE	NONE	NONE	NONE	NONE	NONE	AT2G07771-AT2G07772
Chr2:3329250-3329449	hypo	1	10	67	0.1824	0.0786	2.3198	NONE	NONE	NONE	NONE	NONE	NONE	AT2G07687-AT2G07689
Chr2:3336750-3336999	hypo	0	13	82	0.2633	0.1125	2.3411	AT2G07689	+	protein_coding_gene	Symbols: | NADH-Ubiquinone/plastoquinone (complex I) protein | chr2:3336109-3336753 FORWARD LENGTH=214	NONE	NONE	NONE
Chr2:3349250-3349449	hypo	0	10	49	0.2459	0.0825	2.9818	AT2G07599	-	protein_coding_gene	Symbols: | unknown protein; BEST Arabidopsis thaliana protein match is: unknown protein (TAIR:ATMG01040.1). | chr2:3348848-3351073 REVERSE LENGTH=261	NONE	NONE	NONE
Chr2:3396550-3396749	hypo	3	10	115	0.095	0.0444	2.1375	NONE	NONE	NONE	NONE	NONE	NONE	AT2G07708-AT2G07713
Chr2:3406050-3406249	hypo	0	9	59	0.1699	0.044	3.8664	NONE	NONE	NONE	NONE	NONE	NONE	AT2G07708-AT2G07713
Chr2:3412350-3412549	hypo	1	9	84	0.2033	0.0831	2.4457	AT2G07715	+	protein_coding_gene	Symbols: | Nucleic acid-binding, OB-fold-like protein | chr2:3411180-3412694 FORWARD LENGTH=389	NONE	NONE	NONE
Chr2:3438850-3439099	hypo	0	15	65	0.1761	0.0553	3.1853	AT2G07722	+	protein_coding_gene	Symbols: | unknown protein; BEST Arabidopsis thaliana protein match is: unknown protein (TAIR:ATMG00620.1); Has 15 Blast hits to 15 proteins in 5 species: Archae - 0; Bacteria - 0; Metazoa - 0; Fungi - 0; Plants - 15; Viruses - 0; Other Eukaryotes - 0 (source: NCBI BLink). | chr2:3438742-3439161 FORWARD LENGTH=139	NONE	NONE	NONE
Chr2:3453650-3453899	hypo	0	8	96	0.1525	0.082	1.8593	AT2G07728	+	protein_coding_gene	Symbols: | unknown protein; FUNCTIONS IN: molecular_function unknown; INVOLVED IN: biological_process unknown; LOCATED IN: cellular_component unknown; EXPRESSED IN: cultured cell; Has 1 Blast hits to 1 proteins in 1 species: Archae - 0; Bacteria - 0; Metazoa - 0; Fungi - 0; Plants - 1; Viruses - 0; Other Eukaryotes - 0 (source: NCBI BLink). | chr2:3453686-3456127 FORWARD LENGTH=286	NONE	NONE	NONE
Chr2:3454100-3454349	hypo	0	9	95	0.0496	0.0264	1.8801	AT2G07728	+	protein_coding_gene	Symbols: | unknown protein; FUNCTIONS IN: molecular_function unknown; INVOLVED IN: biological_process unknown; LOCATED IN: cellular_component unknown; EXPRESSED IN: cultured cell; Has 1 Blast hits to 1 proteins in 1 species: Archae - 0; Bacteria - 0; Metazoa - 0; Fungi - 0; Plants - 1; Viruses - 0; Other Eukaryotes - 0 (source: NCBI BLink). | chr2:3453686-3456127 FORWARD LENGTH=286	AT2TE15030	LTR/Copia	NONE
Chr2:3459400-3459649	hypo	0	13	100	0.275	0.1223	2.2494	NONE	NONE	NONE	NONE	AT2TE15045	LTR/Copia	NONE
Chr2:3465100-3465349	hypo	0	17	110	0.1476	0.0648	2.2792	NONE	NONE	NONE	NONE	NONE	NONE	AT2G07728-AT2G07732
Chr2:3466600-3466799	hypo	0	10	84	0.2594	0.0982	2.6417	NONE	NONE	NONE	NONE	NONE	NONE	AT2G07728-AT2G07732
Chr2:3471250-3471499	hypo	0	24	138	0.2	0.0973	2.0561	NONE	NONE	NONE	NONE	NONE	NONE	AT2G07732-AT2G07734
Chr2:3485750-3486049	hypo	1	27	100	0.0508	0.0223	2.2772	AT2G07806	+	protein_coding_gene	Symbols: | unknown protein; FUNCTIONS IN: molecular_function unknown; INVOLVED IN: biological_process unknown; LOCATED IN: cellular_component unknown; Has 1 Blast hits to 1 proteins in 1 species: Archae - 0; Bacteria - 0; Metazoa - 0; Fungi - 0; Plants - 1; Viruses - 0; Other Eukaryotes - 0 (source: NCBI BLink). | chr2:3484830-3489421 FORWARD LENGTH=212	NONE	NONE	NONE
Chr2:3488900-3489149	hypo	0	24	118	0.089	0.044	2.0215	AT2G07806	+	protein_coding_gene	Symbols: | unknown protein; FUNCTIONS IN: molecular_function unknown; INVOLVED IN: biological_process unknown; LOCATED IN: cellular_component unknown; Has 1 Blast hits to 1 proteins in 1 species: Archae - 0; Bacteria - 0; Metazoa - 0; Fungi - 0; Plants - 1; Viruses - 0; Other Eukaryotes - 0 (source: NCBI BLink). | chr2:3484830-3489421 FORWARD LENGTH=212	NONE	NONE	NONE
Chr2:3491300-3491499	hypo	0	8	67	0.1605	0.0672	2.3895	NONE	NONE	NONE	NONE	NONE	NONE	AT2G07734-AT2G07738
Chr2:3492100-3492349	hypo	2	21	104	0.1547	0.0662	2.3377	AT2G07738	-	protein_coding_gene	Symbols: | unknown protein; Has 3 Blast hits to 3 proteins in 1 species: Archae - 0; Bacteria - 0; Metazoa - 0; Fungi - 0; Plants - 3; Viruses - 0; Other Eukaryotes - 0 (source: NCBI BLink). | chr2:3492434-3492700 REVERSE LENGTH=88	NONE	NONE	NONE
Chr2:3496200-3496499	hypo	1	9	105	0.1627	0.0727	2.2369	NONE	NONE	NONE	NONE	NONE	NONE	AT2G07830-AT2G07835
Chr2:3500450-3500699	hypo	1	13	102	0.1079	0.0577	1.8721	NONE	NONE	NONE	NONE	NONE	NONE	AT2G07830-AT2G07835
Chr2:3718150-3718449	hypo	0	10	115	0.1707	0.0878	1.944	NONE	NONE	NONE	NONE	NONE	NONE	AT2G09840-AT2G09970
Chr2:4869650-4869899	hypo	0	7	40	0.3775	0.0455	8.3046	NONE	NONE	NONE	NONE	AT2TE20145	RC/Helitron	NONE
Chr2:4962450-4962649	hypo	0	7	60	0.2658	0.1133	2.3454	NONE	NONE	NONE	NONE	AT2TE20360	RC/Helitron	NONE
Chr2:5076550-5076949	hypo	0	15	156	0.0855	0.0311	2.7506	NONE	NONE	NONE	NONE	AT2TE20870	LTR/Copia	NONE
Chr2:5077300-5077599	hypo	0	19	120	0.132	0.0527	2.5068	NONE	NONE	NONE	NONE	AT2TE20870	LTR/Copia	NONE
Chr2:510850-511199	hypo	0	8	80	0.2696	0.1561	1.7271	NONE	NONE	NONE	NONE	AT2TE02190	RC/Helitron	NONE
Chr2:5464850-5465099	hypo	0	8	63	0.2349	0.1224	1.9188	NONE	NONE	NONE	NONE	NONE	NONE	AT2G13150-AT2G13272
Chr2:5678000-5678249	hypo	0	9	107	0.1266	0.0543	2.3323	AT2G13620	+	protein_coding_gene	Symbols: ATCHX15, CHX15 | cation/hydrogen exchanger 15 | chr2:5678006-5680621 FORWARD LENGTH=821	NONE	NONE	NONE
Chr2:5724650-5724949	hypo	1	18	95	0.3022	0.1672	1.807	AT2G13720	+	protein_coding_gene	Symbols: | DNA topoisomerase (ATP-hydrolyzing)s;ATP binding;DNA binding | chr2:5724039-5725248 FORWARD LENGTH=223	NONE	NONE	NONE
Chr2:5806850-5807049	hypo	0	7	59	0.2421	0.0839	2.8843	NONE	NONE	NONE	NONE	AT2TE23655	RC/Helitron	NONE
Chr2:6125200-6125399	hypo	1	7	87	0.094	0.0385	2.4395	NONE	NONE	NONE	NONE	AT2TE24905	LTR/Gypsy	NONE
Chr2:6545400-6545599	hypo	0	11	62	0.168	0.071	2.3653	NONE	NONE	NONE	NONE	NONE	NONE	AT2G15090-AT2G15110
Chr2:6810050-6810299	hypo	0	8	57	0.4667	0.1808	2.5809	NONE	NONE	NONE	NONE	AT2TE27795	LINE/L1	NONE
Chr2:7026050-7026299	hypo	0	7	110	0.0385	0.0039	9.8112	NONE	NONE	NONE	NONE	NONE	NONE	AT2G16200-AT2G16210
Chr2:7143550-7143799	hypo	0	9	26	0.0476	0.0059	8.0603	AT2G16485	-	protein_coding_gene	Symbols: | nucleic acid binding;zinc ion binding;DNA binding | chr2:7137269-7145222 REVERSE LENGTH=1773	AT2TE29070	DNA/MuDR	NONE
Chr2:7147600-7147799	hypo	0	9	59	0.2571	0.0948	2.7119	AT2G16490	-	protein_coding_gene	Symbols: | XH domain-containing protein | chr2:7146000-7147296 REVERSE LENGTH=179	NONE	NONE	NONE
Chr2:7866800-7867099	hypo	0	14	136	0.16	0.0981	1.6309	AT2G18090	+	protein_coding_gene	Symbols: | PHD finger family protein / SWIB complex BAF60b domain-containing protein / GYF domain-containing protein | chr2:7864501-7867317 FORWARD LENGTH=824	NONE	NONE	NONE
Chr2:7906550-7906899	hypo	0	15	84	0.4023	0.192	2.096	NONE	NONE	NONE	NONE	AT2TE32755|AT2TE32760	RC/Helitron;DNA/Mariner	NONE
Chr2:7907200-7907549	hypo	0	14	55	0.3964	0.2293	1.7288	NONE	NONE	NONE	NONE	AT2TE32755|AT2TE32765	RC/Helitron;DNA/MuDR	NONE
Chr2:8172750-8173049	hypo	0	7	66	0.4747	0.1031	4.6024	AT2G18880	+	protein_coding_gene	Symbols: VEL2 | vernalization5/VIN3-like | chr2:8176386-8178788 FORWARD LENGTH=529	AT2TE33970	RC/Helitron	NONE
Chr2:8288200-8288399	hypo	0	8	88	0.0952	0.0418	2.279	AT2G19120	-	protein_coding_gene	Symbols: | P-loop containing nucleoside triphosphate hydrolases superfamily protein | chr2:8287036-8291802 REVERSE LENGTH=1090	NONE	NONE	NONE
Chr2:8302750-8302949	hypo	0	7	27	0.5067	0.2655	1.908	NONE	NONE	NONE	NONE	AT2TE34525	RC/Helitron	NONE
Chr2:8614250-8614549	hypo	0	8	113	0.1573	0.0624	2.5198	AT2G19940	+	protein_coding_gene	Symbols: | oxidoreductases, acting on the aldehyde or oxo group of donors, NAD or NADP as acceptor;copper ion binding | chr2:8613168-8615649 FORWARD LENGTH=401	NONE	NONE	NONE
Chr2:8769250-8769449	hypo	0	13	92	0.1963	0.0969	2.0249	AT2G20320	+	protein_coding_gene	Symbols: | DENN (AEX-3) domain-containing protein | chr2:8767082-8772271 FORWARD LENGTH=1029	NONE	NONE	NONE
Chr2:883400-883649	hypo	0	8	90	0.0597	0.0038	15.7082	AT2G03020	-	protein_coding_gene	Symbols: | Heat shock protein HSP20/alpha crystallin family | chr2:882927-884081 REVERSE LENGTH=255	NONE	NONE	NONE
Chr2:900-1099	hypo	0	8	53	0.0818	0.0283	2.8894	AT2G01008	+	protein_coding_gene	Symbols: | FUNCTIONS IN: molecular_function unknown; INVOLVED IN: biological_process unknown; LOCATED IN: cellular_component unknown; BEST Arabidopsis thaliana protein match is: maternal effect embryo arrest 38 (TAIR:AT3G43160.1). | chr2:1025-2111 FORWARD LENGTH=179	NONE	NONE	NONE
Chr2:9100-9299	hypo	0	11	110	0.4418	0.2076	2.128	NONE	NONE	NONE	NONE	NONE	NONE	AT2G01021-AT2G01023
Chr2:9276100-9276449	hypo	0	9	137	0.0486	0.0056	8.6974	AT2G21720	+	protein_coding_gene	Symbols: | Plant protein of unknown function (DUF639) | chr2:9273696-9276802 FORWARD LENGTH=734	NONE	NONE	NONE
Chr2:953150-953349	hypo	0	9	64	0.1316	0.0641	2.052	AT2G03150	+	protein_coding_gene	Symbols: emb1579 | ATP/GTP-binding protein family | chr2:952313-959004 FORWARD LENGTH=1340	NONE	NONE	NONE
Chr2:954950-955299	hypo	0	10	125	0.1429	0.0592	2.4118	AT2G03150	+	protein_coding_gene	Symbols: emb1579 | ATP/GTP-binding protein family | chr2:952313-959004 FORWARD LENGTH=1340	NONE	NONE	NONE
Chr2:9852750-9852949	hypo	0	7	53	0.2869	0.1374	2.0877	NONE	NONE	NONE	NONE	AT2TE42130	DNA/Harbinger	NONE
Chr3:10395650-10395949	hypo	0	13	111	0.1943	0.0856	2.2692	AT3G27980	+	protein_coding_gene	Symbols: | Plant invertase/pectin methylesterase inhibitor superfamily | chr3:10393904-10395861 FORWARD LENGTH=497	AT3TE43170	LTR/Copia	NONE
Chr3:10804500-10804849	hypo	0	11	109	0.1818	0.0878	2.0698	NONE	NONE	NONE	NONE	AT3TE44925	RC/Helitron	NONE
Chr3:11032300-11032649	hypo	0	27	123	0.3976	0.1245	3.1934	NONE	NONE	NONE	NONE	AT3TE45865	DNA	NONE
Chr3:11097450-11097649	hypo	0	7	36	0.0891	0.0042	21.0956	NONE	NONE	NONE	NONE	AT3TE46170	DNA/HAT	NONE
Chr3:11226650-11226899	hypo	0	12	64	0.3526	0.1599	2.2056	NONE	NONE	NONE	NONE	AT3TE46775	DNA/Harbinger	NONE
Chr3:11295100-11295299	hypo	0	7	47	0.2905	0.0622	4.6736	NONE	NONE	NONE	NONE	AT3TE47075	DNA/MuDR	NONE
Chr3:11305700-11305999	hypo	0	11	60	0.2879	0.0404	7.1223	NONE	NONE	NONE	NONE	AT3TE47110	RC/Helitron	NONE
Chr3:11376500-11376749	hypo	0	7	64	0.2297	0.0887	2.5897	NONE	NONE	NONE	NONE	AT3TE47395	RC/Helitron	NONE
Chr3:11432200-11432399	hypo	0	7	60	0.1529	0.0377	4.0553	NONE	NONE	NONE	NONE	AT3TE47635|AT3TE47640	RC/Helitron;RC/Helitron	NONE
Chr3:1165850-1166149	hypo	0	8	78	0.082	0.0181	4.5401	NONE	NONE	NONE	NONE	NONE	NONE	AT3G04390-AT3G04400
Chr3:11724900-11725249	hypo	0	10	101	0.1472	0.0456	3.2259	NONE	NONE	NONE	NONE	AT3TE48830	DNA/HAT	NONE
Chr3:12608500-12608749	hypo	0	10	70	0.4198	0.1957	2.1454	NONE	NONE	NONE	NONE	NONE	NONE	AT3G30842-AT3G30845
Chr3:12817900-12818149	hypo	0	8	64	0.0932	0.0415	2.2477	NONE	NONE	NONE	NONE	NONE	NONE	AT3G31430-AT3G31900
Chr3:1283250-1283499	hypo	0	7	47	0.4706	0.1951	2.4118	NONE	NONE	NONE	NONE	AT3TE05385	RC/Helitron	NONE
Chr3:12861050-12861299	hypo	0	12	103	0.1895	0.0957	1.9804	NONE	NONE	NONE	NONE	AT3TE52800|AT3TE52805	LINE/L1;LTR/Gypsy	NONE
Chr3:13531800-13532099	hypo	0	10	106	0.2895	0.1119	2.5877	NONE	NONE	NONE	NONE	NONE	NONE	AT3G32980-AT3G33187
Chr3:14272800-14273099	hypo	0	7	37	0.45	0.146	3.0825	NONE	NONE	NONE	NONE	AT3TE58650|AT3TE58655	RC/Helitron;RC/Helitron	NONE
Chr3:14725050-14725249	hypo	0	7	90	0.0715	0.0182	3.939	AT3G42640	+	protein_coding_gene	Symbols: AHA8, HA8 | H(+)-ATPase 8 | chr3:14724309-14728062 FORWARD LENGTH=948	NONE	NONE	NONE
Chr3:15450850-15451199	hypo	0	8	61	0.2098	0.0395	5.3115	NONE	NONE	NONE	NONE	AT3TE62670	RC/Helitron	NONE
Chr3:15609350-15609549	hypo	0	10	44	0.3371	0.1239	2.7216	NONE	NONE	NONE	NONE	AT3TE63095	DNA	NONE
Chr3:15738700-15738899	hypo	0	10	56	0.2376	0.1122	2.1182	NONE	NONE	NONE	NONE	AT3TE63610|AT3TE63615|AT3TE63620	DNA/MuDR;DNA/MuDR;RC/Helitron	NONE
Chr3:15802700-15803049	hypo	0	7	94	0.0514	0.0146	3.5299	AT3G44020	+	protein_coding_gene	Symbols: | thylakoid lumenal P17.1 protein | chr3:15801382-15802561 FORWARD LENGTH=159	AT3TE63885	DNA/Harbinger	NONE
Chr3:15994900-15995199	hypo	0	7	130	0.0483	0.0149	3.2335	AT3G44320	+	protein_coding_gene	Symbols: NIT3, AtNIT3 | nitrilase 3 | chr3:15993419-15995493 FORWARD LENGTH=346	NONE	NONE	NONE
Chr3:16126850-16127099	hypo	0	7	99	0.1263	0.0557	2.2671	AT3G44540	+	protein_coding_gene	Symbols: FAR4 | fatty acid reductase 4 | chr3:16124079-16127769 FORWARD LENGTH=493	NONE	NONE	NONE
Chr3:1637500-1637799	hypo	0	7	117	0.0551	0.0028	19.592	AT3G05630	+	protein_coding_gene	Symbols: PLDP2, PDLZ2, PLDZETA2 | phospholipase D P2 | chr3:1635321-1640105 FORWARD LENGTH=1046	NONE	NONE	NONE
Chr3:16531950-16532299	hypo	0	14	87	0.2353	0.007	33.6471	NONE	NONE	NONE	NONE	AT3TE67005|AT3TE67010	RC/Helitron;RC/Helitron	NONE
Chr3:16851700-16851949	hypo	0	8	58	0.0904	0.0372	2.4325	NONE	NONE	NONE	NONE	AT3TE68255	RC/Helitron	NONE
Chr3:16869700-16869899	hypo	0	9	72	0.0651	0.0066	9.8088	AT3G45880	-	protein_coding_gene	Symbols: | 2-oxoglutarate (2OG) and Fe(II)-dependent oxygenase superfamily protein | chr3:16869855-16871544 REVERSE LENGTH=345	NONE	NONE	NONE
Chr3:17048100-17048299	hypo	0	7	38	0.518	0.1895	2.7335	NONE	NONE	NONE	NONE	AT3TE69105	DNA/MuDR	NONE
Chr3:17305600-17305949	hypo	0	13	126	0.0609	0.0032	19.2023	AT3G46970	-	protein_coding_gene	Symbols: ATPHS2, PHS2 | alpha-glucan phosphorylase 2 | chr3:17301625-17306111 REVERSE LENGTH=841	NONE	NONE	NONE
Chr3:17577700-17577899	hypo	0	7	87	0.0913	0.0427	2.1354	AT3G47680	-	protein_coding_gene	Symbols: | DNA binding | chr3:17577483-17578391 REVERSE LENGTH=302	AT3TE71210	DNA/Harbinger	NONE
Chr3:17924350-17924549	hypo	0	8	82	0.0908	0.0283	3.2092	AT3G48400	+	protein_coding_gene	Symbols: | Cysteine/Histidine-rich C1 domain family protein | chr3:17923678-17925589 FORWARD LENGTH=619	NONE	NONE	NONE
Chr3:18062350-18062749	hypo	0	17	96	0.4386	0.1562	2.8073	NONE	NONE	NONE	NONE	AT3TE73225|AT3TE73230	DNA;DNA	NONE
Chr3:19105150-19105349	hypo	0	8	94	0.1013	0.0421	2.4072	AT3G51490	-	protein_coding_gene	Symbols: TMT3 | tonoplast monosaccharide transporter3 | chr3:19105018-19107562 REVERSE LENGTH=729	NONE	NONE	NONE
Chr3:19202950-19203149	hypo	0	7	87	0.0629	0.0026	24.4794	AT3G51770	-	protein_coding_gene	Symbols: ETO1, ATEOL1 | tetratricopeptide repeat (TPR)-containing protein | chr3:19200328-19203974 REVERSE LENGTH=951	NONE	NONE	NONE
Chr3:19316650-19316849	hypo	0	8	108	0.0684	0.0306	2.2381	AT3G52080	+	protein_coding_gene	Symbols: chx28 | cation/hydrogen exchanger 28 | chr3:19315090-19317735 FORWARD LENGTH=801	NONE	NONE	NONE
Chr3:19378200-19378399	hypo	0	10	92	0.1187	0.0463	2.5653	AT3G52250	+	protein_coding_gene	Symbols: | Duplicated homeodomain-like superfamily protein | chr3:19376629-19383100 FORWARD LENGTH=1656	NONE	NONE	NONE
Chr3:19428950-19429249	hypo	0	11	85	0.4451	0.2113	2.1066	NONE	NONE	NONE	NONE	AT3TE78850	RC/Helitron	NONE
Chr3:19568200-19568599	hypo	0	17	102	0.2717	0.0253	10.737	NONE	NONE	NONE	NONE	NONE	NONE	AT3G52790-AT3G52800
Chr3:20680600-20680949	hypo	0	9	160	0.0502	0.0063	8.0138	AT3G55720	+	protein_coding_gene	Symbols: | Protein of unknown function (DUF620) | chr3:20679893-20681338 FORWARD LENGTH=438	NONE	NONE	NONE
Chr3:20983300-20983499	hypo	0	14	81	0.0951	0.0465	2.0465	AT3G56640	+	protein_coding_gene	Symbols: SEC15A | exocyst complex component sec15A | chr3:20981964-20984336 FORWARD LENGTH=790	NONE	NONE	NONE
Chr3:21200700-21201049	hypo	0	19	155	0.1133	0.0515	2.202	AT3G57300	+	protein_coding_gene	Symbols: INO80, ATINO80 | INO80 ortholog | chr3:21199612-21207635 FORWARD LENGTH=1507	NONE	NONE	NONE
Chr3:21512700-21512949	hypo	0	8	127	0.0499	0.0222	2.2485	AT3G58090	-	protein_coding_gene	Symbols: | Disease resistance-responsive (dirigent-like protein) family protein | chr3:21512479-21513905 REVERSE LENGTH=271	NONE	NONE	NONE
Chr3:21526600-21526799	hypo	0	7	54	0.1497	0.0055	27.2538	NONE	NONE	NONE	NONE	NONE	NONE	AT3G58120-AT3G58130
Chr3:22053450-22053799	hypo	1	13	149	0.0515	0.011	4.6573	AT3G59700	+	protein_coding_gene	Symbols: ATHLECRK, LECRK1, HLECRK | lectin-receptor kinase | chr3:22052146-22054131 FORWARD LENGTH=661	NONE	NONE	NONE
Chr3:22209400-22209749	hypo	0	13	112	0.0618	0.0028	22.4135	NONE	NONE	NONE	NONE	NONE	NONE	AT3G60120-AT3G60130
Chr3:2236700-2236999	hypo	0	7	117	0.0787	0.0373	2.1139	AT3G07060	+	protein_coding_gene	Symbols: emb1974 | NHL domain-containing protein | chr3:2232760-2236913 FORWARD LENGTH=774	NONE	NONE	NONE
Chr3:22475750-22475949	hypo	0	7	93	0.1046	0.0392	2.665	AT3G60830	+	protein_coding_gene	Symbols: ATARP7, ARP7 | actin-related protein 7 | chr3:22474298-22476000 FORWARD LENGTH=363	NONE	NONE	NONE
Chr3:22665650-22665999	hypo	0	11	94	0.0972	0.0062	15.572	NONE	NONE	NONE	NONE	NONE	NONE	AT3G61230-AT3G61240
Chr3:2276800-2277099	hypo	0	10	123	0.1461	0.0734	1.9911	AT3G07160	-	protein_coding_gene	Symbols: ATGSL10, gsl10, CALS9 | glucan synthase-like 10 | chr3:2265142-2279383 REVERSE LENGTH=1890	NONE	NONE	NONE
Chr3:22927300-22927599	hypo	0	8	99	0.0706	0.0032	22.0941	NONE	NONE	NONE	NONE	NONE	NONE	AT3G61900-AT3G61910
Chr3:2724900-2725099	hypo	0	7	99	0.0842	0.0304	2.766	AT3G08947	+	protein_coding_gene	Symbols: | ARM repeat superfamily protein | chr3:2724007-2726722 FORWARD LENGTH=873	NONE	NONE	NONE
Chr3:2772950-2773199	hypo	0	7	59	0.2572	0.0963	2.6715	NONE	NONE	NONE	NONE	AT3TE11705	DNA/MuDR	NONE
Chr3:3139750-3139949	hypo	0	7	97	0.0757	0.0328	2.312	AT3G10160	-	protein_coding_gene	Symbols: ATDFC, DFC, FPGS2 | DHFS-FPGS homolog C | chr3:3139588-3143949 REVERSE LENGTH=625	NONE	NONE	NONE
Chr3:3140200-3140649	hypo	0	19	178	0.0904	0.0359	2.5162	AT3G10160	-	protein_coding_gene	Symbols: ATDFC, DFC, FPGS2 | DHFS-FPGS homolog C | chr3:3139588-3143949 REVERSE LENGTH=625	NONE	NONE	NONE
Chr3:3771400-3771699	hypo	0	12	92	0.068	0.0087	7.7685	NONE	NONE	NONE	NONE	NONE	NONE	AT3G11910-AT3G11920
Chr3:3789200-3789549	hypo	0	11	142	0.0484	0.019	2.5479	AT3G11960	+	protein_coding_gene	Symbols: | Cleavage and polyadenylation specificity factor (CPSF) A subunit protein | chr3:3786431-3793160 FORWARD LENGTH=1379	NONE	NONE	NONE
Chr3:4067350-4067649	hypo	0	11	117	0.0639	0.0199	3.2098	AT3G12810	+	protein_coding_gene	Symbols: PIE1, SRCAP, chr13 | SNF2 domain-containing protein / helicase domain-containing protein | chr3:4065636-4073992 FORWARD LENGTH=2055	NONE	NONE	NONE
Chr3:4067850-4068049	hypo	0	11	82	0.1142	0.0518	2.2033	AT3G12810	+	protein_coding_gene	Symbols: PIE1, SRCAP, chr13 | SNF2 domain-containing protein / helicase domain-containing protein | chr3:4065636-4073992 FORWARD LENGTH=2055	NONE	NONE	NONE
Chr3:4265450-4265699	hypo	0	7	97	0.0207	0.0023	8.9192	AT3G13226	-	protein_coding_gene	Symbols: | regulatory protein RecX family protein | chr3:4264442-4266286 REVERSE LENGTH=382	NONE	NONE	NONE
Chr3:457450-457649	hypo	0	8	91	0.1117	0.0386	2.8934	AT3G02280	+	protein_coding_gene	Symbols: | Flavodoxin family protein | chr3:453646-457659 FORWARD LENGTH=623	NONE	NONE	NONE
Chr3:4792350-4792649	hypo	0	10	109	0.0197	0.0053	3.7439	AT3G14360	+	protein_coding_gene	Symbols: | alpha/beta-Hydrolases superfamily protein | chr3:4791596-4793534 FORWARD LENGTH=518	NONE	NONE	NONE
Chr3:502900-503249	hypo	0	8	158	0.0631	0.0202	3.1188	AT3G02450	-	protein_coding_gene	Symbols: | cell division protein ftsH, putative | chr3:502876-505030 REVERSE LENGTH=622	NONE	NONE	NONE
Chr3:5140150-5140399	hypo	2	7	89	0.1017	0.0442	2.301	AT3G15260|AT3G15270	+|-	protein_coding_gene|protein_coding_gene	Symbols: | Protein phosphatase 2C family protein | chr3:5138842-5140242 FORWARD LENGTH=289;Symbols: SPL5 | squamosa promoter binding protein-like 5 | chr3:5140624-5141256 REVERSE LENGTH=181	NONE	NONE	NONE
Chr3:5366400-5366749	hypo	0	21	108	0.1942	0.0361	5.3725	AT3G15880	-	protein_coding_gene	Symbols: WSIP2, TPR4 | WUS-interacting protein 2 | chr3:5364792-5371869 REVERSE LENGTH=1135	NONE	NONE	NONE
Chr3:5633450-5633799	hypo	0	11	154	0.0375	0.0037	10.1472	AT3G16555	+	protein_coding_gene	Symbols: | F-box family protein | chr3:5633426-5634542 FORWARD LENGTH=349	NONE	NONE	NONE
Chr3:565700-566099	hypo	0	18	154	0.015	0.0042	3.5315	AT3G02640	-	protein_coding_gene	Symbols: | unknown protein; BEST Arabidopsis thaliana protein match is: unknown protein (TAIR:AT5G16250.1); Has 96 Blast hits to 96 proteins in 16 species: Archae - 0; Bacteria - 0; Metazoa - 0; Fungi - 0; Plants - 95; Viruses - 0; Other Eukaryotes - 1 (source: NCBI BLink). | chr3:565064-565621 REVERSE LENGTH=185	NONE	NONE	NONE
Chr3:592650-592949	hypo	0	7	109	0.0556	0.004	14	AT3G02740	+	protein_coding_gene	Symbols: | Eukaryotic aspartyl protease family protein | chr3:590561-593089 FORWARD LENGTH=488	NONE	NONE	NONE
Chr3:6129800-6129999	hypo	0	7	82	0.0248	0.0058	4.3006	AT3G17900	+	protein_coding_gene	Symbols: | unknown protein; FUNCTIONS IN: molecular_function unknown; INVOLVED IN: biological_process unknown; LOCATED IN: cellular_component unknown; EXPRESSED IN: 23 plant structures; EXPRESSED DURING: 13 growth stages; Has 45 Blast hits to 44 proteins in 14 species: Archae - 0; Bacteria - 0; Metazoa - 2; Fungi - 2; Plants - 39; Viruses - 0; Other Eukaryotes - 2 (source: NCBI BLink). | chr3:612…	NONE	NONE	NONE
Chr3:6365850-6366149	hypo	0	11	89	0.1292	0.0093	13.9627	NONE	NONE	NONE	NONE	AT3TE26780|AT3TE26785|AT3TE26790	DNA/MuDR;RC/Helitron;RC/Helitron	NONE
Chr3:6561700-6562049	hypo	0	10	127	0.0377	0.0026	14.7796	AT3G19020	-	protein_coding_gene	Symbols: | Leucine-rich repeat (LRR) family protein | chr3:6559174-6562044 REVERSE LENGTH=956	NONE	NONE	NONE
Chr3:6634050-6634349	hypo	0	13	105	0.0809	0.0276	2.9339	AT3G19180	+	protein_coding_gene	Symbols: ARC6H, PARC6, ATCDP1, CDP1 | paralog of ARC6 | chr3:6632810-6636953 FORWARD LENGTH=819	NONE	NONE	NONE
Chr3:6740300-6740549	hypo	0	7	72	0.0902	0.009	10.0782	NONE	NONE	NONE	NONE	NONE	NONE	AT3G19430-AT3G19440
Chr3:743650-743949	hypo	0	9	163	0.0388	0.0124	3.1344	AT3G03220	-	protein_coding_gene	Symbols: ATEXPA13, EXP13, ATEXP13, ATHEXP ALPHA 1.22, EXPA13 | expansin A13 | chr3:742655-743975 REVERSE LENGTH=266	NONE	NONE	NONE
Chr3:7535000-7535199	hypo	0	7	84	0.1401	0.0439	3.1892	AT3G21400	-	protein_coding_gene	Symbols: | unknown protein; FUNCTIONS IN: molecular_function unknown; INVOLVED IN: N-terminal protein myristoylation; EXPRESSED IN: 22 plant structures; EXPRESSED DURING: 13 growth stages; Has 29 Blast hits to 29 proteins in 12 species: Archae - 0; Bacteria - 0; Metazoa - 2; Fungi - 0; Plants - 27; Viruses - 0; Other Eukaryotes - 0 (source: NCBI BLink). | chr3:7534824-7536293 REVERSE LENGTH=188	NONE	NONE	NONE
Chr3:7850900-7851199	hypo	0	9	65	0.2865	0.1003	2.8558	NONE	NONE	NONE	NONE	AT3TE32940	RC/Helitron	NONE
Chr3:8653200-8653549	hypo	0	12	161	0.05	0.0039	12.7564	AT3G23950	-	protein_coding_gene	Symbols: | F-box family protein | chr3:8652908-8654164 REVERSE LENGTH=418	NONE	NONE	NONE
Chr3:8659750-8660199	hypo	0	19	139	0.2348	0.0945	2.4847	NONE	NONE	NONE	NONE	AT3TE36300	RathE1_cons	NONE
Chr3:8977100-8977299	hypo	0	9	49	0.5174	0.2414	2.1434	AT3G24610	-	protein_coding_gene	Symbols: | Galactose oxidase/kelch repeat superfamily protein | chr3:8975366-8978102 REVERSE LENGTH=445	NONE	NONE	NONE
Chr3:9143300-9143549	hypo	0	9	61	0.1943	0.0645	3.0137	NONE	NONE	NONE	NONE	NONE	NONE	AT3G25090-AT3G25099
Chr3:9455200-9455399	hypo	0	7	84	0.0595	0.0286	2.0777	AT3G25840	-	protein_coding_gene	Symbols: | Protein kinase superfamily protein | chr3:9452993-9457446 REVERSE LENGTH=935	NONE	NONE	NONE
Chr3:9917650-9917999	hypo	0	7	131	0.0699	0.0054	12.9743	AT3G26910	-	protein_coding_gene	Symbols: | hydroxyproline-rich glycoprotein family protein | chr3:9915338-9918511 REVERSE LENGTH=608	NONE	NONE	NONE
Chr4:1000100-1000349	hypo	0	10	49	0.5307	0.2241	2.3681	NONE	NONE	NONE	NONE	AT4TE05105	RC/Helitron	NONE
Chr4:10057900-10058199	hypo	0	7	84	0.0598	0.005	11.8996	NONE	NONE	NONE	NONE	NONE	NONE	AT4G18160-AT4G18170
Chr4:10536000-10536299	hypo	0	13	126	0.1493	0.0637	2.3419	AT4G19260	+	protein_coding_gene	Symbols: | Galactose oxidase/kelch repeat superfamily protein | chr4:10533296-10536262 FORWARD LENGTH=288	AT4TE48170	DNA/MuDR	NONE
Chr4:10647850-10648149	hypo	0	7	80	0.0983	0.0098	10.0599	NONE	NONE	NONE	NONE	AT4TE48735	DNA/MuDR	NONE
Chr4:1169600-1169799	hypo	0	7	66	0.1132	0.0538	2.1039	AT4G02660	-	protein_coding_gene	Symbols: | Beige/BEACH domain ;WD domain, G-beta repeat protein | chr4:1159927-1173791 REVERSE LENGTH=3527	NONE	NONE	NONE
Chr4:11913800-11914049	hypo	0	11	92	0.0729	0.0377	1.9301	AT4G22650	+	protein_coding_gene	Symbols: | CONTAINS InterPro DOMAIN/s: Plant lipid transfer protein/seed storage/trypsin-alpha amylase inhibitor (InterPro:IPR003612); BEST Arabidopsis thaliana protein match is: Bifunctional inhibitor/lipid-transfer protein/seed storage 2S albumin superfamily protein (TAIR:AT4G22640.1); Has 25 Blast hits to 25 proteins in 2 species: Archae - 0; Bacteria - 0; Metazoa - 0; Fungi - 0; Plants - 25; …	NONE	NONE	NONE
Chr4:12293600-12293899	hypo	0	9	126	0.1027	0.0468	2.1955	AT4G23560	-	protein_coding_gene	Symbols: AtGH9B15, GH9B15 | glycosyl hydrolase 9B15 | chr4:12293633-12295788 REVERSE LENGTH=479	NONE	NONE	NONE
Chr4:12588000-12588349	hypo	0	10	89	0.1508	0.0033	45.5829	NONE	NONE	NONE	NONE	AT4TE58665	RC/Helitron	NONE
Chr4:12931200-12931449	hypo	0	7	106	0.0469	0.004	11.7083	AT4G25240	+	protein_coding_gene	Symbols: SKS1 | SKU5 similar 1 | chr4:12930539-12933563 FORWARD LENGTH=589	NONE	NONE	NONE
Chr4:13887800-13887999	hypo	0	8	53	0.5403	0.2357	2.2928	AT4G27890	+	protein_coding_gene	Symbols: | HSP20-like chaperones superfamily protein | chr4:13886033-13887220 FORWARD LENGTH=293	AT4TE65510	DNA/Harbinger	NONE
Chr4:13909250-13909599	hypo	0	10	104	0.1045	0.0038	27.7882	AT4G27950	-	protein_coding_gene	Symbols: CRF4 | cytokinin response factor 4 | chr4:13909732-13910739 REVERSE LENGTH=335	NONE	NONE	NONE
Chr4:13951850-13952099	hypo	0	8	108	0.0709	0.0162	4.3811	AT4G28080	-	protein_coding_gene	Symbols: | Tetratricopeptide repeat (TPR)-like superfamily protein | chr4:13948993-13957840 REVERSE LENGTH=1819	NONE	NONE	NONE
Chr4:14069700-14069999	hypo	0	10	125	0.0529	0.0216	2.4523	AT4G28470	-	protein_coding_gene	Symbols: RPN1B, ATRPN1B | 26S proteasome regulatory subunit S2 1B | chr4:14067082-14072357 REVERSE LENGTH=891	NONE	NONE	NONE
Chr4:14467650-14467899	hypo	0	8	95	0.0835	0.0287	2.9076	AT4G29400	+	protein_coding_gene	Symbols: | Protein of unknown function (DUF3531) | chr4:14466350-14467980 FORWARD LENGTH=302	NONE	NONE	NONE
Chr4:14651450-14651799	hypo	0	14	132	0.1172	0.0494	2.3715	AT4G29940	-	protein_coding_gene	Symbols: PRHA | pathogenesis related homeodomain protein A | chr4:14648346-14652710 REVERSE LENGTH=796	NONE	NONE	NONE
Chr4:15041400-15041749	hypo	0	16	147	0.0844	0.0355	2.3733	AT4G30900	+	protein_coding_gene	Symbols: | DNAse I-like superfamily protein | chr4:15040021-15042203 FORWARD LENGTH=316	NONE	NONE	NONE
Chr4:15759500-15759999	hypo	0	32	220	0.1663	0.0511	3.2513	AT4G32670	-	protein_coding_gene	Symbols: | RING/FYVE/PHD zinc finger superfamily protein | chr4:15759527-15762847 REVERSE LENGTH=860	NONE	NONE	NONE
Chr4:16122000-16122249	hypo	0	8	98	0.0592	0.0251	2.3645	AT4G33520	+	protein_coding_gene	Symbols: PAA1, HMA6 | P-type ATP-ase 1 | chr4:16118993-16120542 FORWARD LENGTH=237	NONE	NONE	NONE
Chr4:17078900-17079199	hypo	0	9	126	0.082	0.0231	3.5516	AT4G36090	-	protein_coding_gene	Symbols: | oxidoreductase, 2OG-Fe(II) oxygenase family protein | chr4:17079042-17080670 REVERSE LENGTH=385	NONE	NONE	NONE
Chr4:17093650-17093849	hypo	0	7	73	0.0611	0.006	10.1278	AT4G36120	-	protein_coding_gene	Symbols: | Plant protein of unknown function (DUF869) | chr4:17093213-17096573 REVERSE LENGTH=996	NONE	NONE	NONE
Chr4:17094000-17094949	hypo	0	42	392	0.1097	0.0567	1.9343	AT4G36120	-	protein_coding_gene	Symbols: | Plant protein of unknown function (DUF869) | chr4:17093213-17096573 REVERSE LENGTH=996	NONE	NONE	NONE
Chr4:17095300-17095549	hypo	0	9	108	0.0756	0.019	3.983	AT4G36120	-	protein_coding_gene	Symbols: | Plant protein of unknown function (DUF869) | chr4:17093213-17096573 REVERSE LENGTH=996	NONE	NONE	NONE
Chr4:17624950-17625199	hypo	0	9	59	0.2086	0.048	4.3504	NONE	NONE	NONE	NONE	NONE	NONE	AT4G37490-AT4G37500
Chr4:18281750-18281949	hypo	0	8	73	0.1047	0.0285	3.6683	AT4G39280	-	protein_coding_gene	Symbols: | phenylalanyl-tRNA synthetase, putative / phenylalanine--tRNA ligase, putative | chr4:18281641-18284831 REVERSE LENGTH=485	NONE	NONE	NONE
Chr4:18346600-18346799	hypo	0	7	89	0.0729	0.0283	2.5736	AT4G39420	+	protein_coding_gene	Symbols: | unknown protein; Has 46 Blast hits to 40 proteins in 10 species: Archae - 0; Bacteria - 0; Metazoa - 0; Fungi - 0; Plants - 44; Viruses - 0; Other Eukaryotes - 2 (source: NCBI BLink). | chr4:18339731-18354701 FORWARD LENGTH=2513	NONE	NONE	NONE
Chr4:18411550-18411899	hypo	0	10	91	0.195	0.08	2.4362	NONE	NONE	NONE	NONE	NONE	NONE	AT4G39670-AT4G39675
Chr4:2493350-2493599	hypo	0	10	96	0.102	0.0319	3.2003	AT4G04910	-	protein_coding_gene	Symbols: NSF | AAA-type ATPase family protein | chr4:2489696-2495666 REVERSE LENGTH=742	NONE	NONE	NONE
Chr4:342700-342899	hypo	0	9	89	0.0667	0.0212	3.1506	AT4G00800	-	protein_coding_gene	Symbols: | transducin family protein / WD-40 repeat family protein | chr4:337114-345581 REVERSE LENGTH=1913	NONE	NONE	NONE
Chr4:3525700-3525899	hypo	0	10	51	0.3883	0.1557	2.4945	NONE	NONE	NONE	NONE	AT4TE15890	DNA/MuDR	NONE
Chr4:405800-406199	hypo	0	18	127	0.0842	0.0044	19.2745	AT4G00950	-	protein_coding_gene	Symbols: MEE47 | Protein of unknown function (DUF688) | chr4:405984-407087 REVERSE LENGTH=291	NONE	NONE	NONE
Chr4:4063200-4063399	hypo	0	8	63	0.4643	0.2075	2.2372	NONE	NONE	NONE	NONE	NONE	NONE	AT4G06740-AT4G06744
Chr4:4207600-4207849	hypo	0	7	68	0.2486	0.1198	2.075	NONE	NONE	NONE	NONE	AT4TE18150	RC/Helitron	NONE
Chr4:5143850-5144099	hypo	0	9	69	0.368	0.1605	2.2937	NONE	NONE	NONE	NONE	AT4TE21340	RC/Helitron	NONE
Chr4:5178300-5178549	hypo	1	22	64	0.4843	0.1992	2.4314	NONE	NONE	NONE	NONE	AT4TE21520|AT4TE21525	DNA/MuDR;DNA/MuDR	NONE
Chr4:5609200-5609499	hypo	0	20	117	0.1361	0.0467	2.9154	AT4G08790	-	protein_coding_gene	Symbols: | Nitrilase/cyanide hydratase and apolipoprotein N-acyltransferase family protein | chr4:5608489-5611118 REVERSE LENGTH=307	NONE	NONE	NONE
Chr4:5644400-5644599	hypo	0	8	40	0.1816	0.0438	4.1427	NONE	NONE	NONE	NONE	AT4TE23645	LINE/L1	NONE
Chr4:5701500-5701799	hypo	0	7	89	0.0885	0.029	3.0495	NONE	NONE	NONE	NONE	AT4TE23840	RC/Helitron	NONE
Chr4:5702550-5702749	hypo	0	7	42	0.3419	0.1429	2.3934	NONE	NONE	NONE	NONE	AT4TE23845	DNA/Pogo	NONE
Chr4:5802950-5803199	hypo	0	16	78	0.1766	0.0876	2.0147	AT4G09070	+	protein_coding_gene	Symbols: | TATA-binding related factor (TRF) of subunit 20 of Mediator complex | chr4:5802308-5803392 FORWARD LENGTH=219	NONE	NONE	NONE
Chr4:5848600-5848799	hypo	0	7	62	0.0637	0.0023	27.2389	AT4G09180	+	protein_coding_gene	Symbols: | basic helix-loop-helix (bHLH) DNA-binding superfamily protein | chr4:5847513-5849500 FORWARD LENGTH=262	NONE	NONE	NONE
Chr4:5918100-5918349	hypo	0	9	83	0.1131	0.0367	3.0811	NONE	NONE	NONE	NONE	NONE	NONE	AT4G09310-AT4G09320
Chr4:6142650-6142899	hypo	0	7	105	0.1305	0.035	3.7295	AT4G09740	-	protein_coding_gene	Symbols: AtGH9B14, GH9B14 | glycosyl hydrolase 9B14 | chr4:6142706-6145003 REVERSE LENGTH=478	NONE	NONE	NONE
Chr4:6144650-6144999	hypo	0	13	131	0.1193	0.0411	2.9046	AT4G09740	-	protein_coding_gene	Symbols: AtGH9B14, GH9B14 | glycosyl hydrolase 9B14 | chr4:6142706-6145003 REVERSE LENGTH=478	NONE	NONE	NONE
Chr4:6428700-6428899	hypo	0	7	38	0.6352	0.309	2.0557	NONE	NONE	NONE	NONE	AT4TE27445	RC/Helitron	NONE
Chr4:6611500-6611749	hypo	0	10	103	0.1165	0.0595	1.9593	AT4G10730	-	protein_coding_gene	Symbols: | Protein kinase superfamily protein | chr4:6609793-6614786 REVERSE LENGTH=711	NONE	NONE	NONE
Chr4:67400-67649	hypo	0	9	70	0.3149	0.1225	2.5708	NONE	NONE	NONE	NONE	AT4TE00310	RC/Helitron	NONE
Chr4:6881650-6881849	hypo	0	7	57	0.1741	0.0329	5.2902	NONE	NONE	NONE	NONE	NONE	NONE	AT4G11300-AT4G11310
Chr4:7365050-7365449	hypo	0	18	103	0.1384	0.0288	4.8099	AT4G12432	-	protein_coding_gene	Symbols: CPuORF26 | conserved peptide upstream open reading frame 26 | chr4:7367442-7367516 REVERSE LENGTH=24	AT4TE32070	DNA/MuDR	NONE
Chr4:743300-743549	hypo	0	9	56	0.3704	0.1689	2.1924	NONE	NONE	NONE	NONE	AT4TE03815	DNA/MuDR	NONE
Chr4:8001950-8002249	hypo	0	8	130	0.0484	0.0045	10.8468	AT4G13800	-	protein_coding_gene	Symbols: | Protein of unknown function (DUF803) | chr4:8002129-8003858 REVERSE LENGTH=336	NONE	NONE	NONE
Chr4:805300-805499	hypo	0	7	78	0.0314	0.0067	4.7078	AT4G01860	-	protein_coding_gene	Symbols: | Transducin family protein / WD-40 repeat family protein | chr4:801713-808018 REVERSE LENGTH=1308	NONE	NONE	NONE
Chr4:8585500-8585799	hypo	0	10	79	0.2216	0.0646	3.4281	NONE	NONE	NONE	NONE	AT4TE38235|AT4TE38240	DNA;LTR/Copia	NONE
Chr4:8897200-8897449	hypo	0	7	95	0.0843	0.04	2.1041	AT4G15570	+	protein_coding_gene	Symbols: MAA3 | P-loop containing nucleoside triphosphate hydrolases superfamily protein | chr4:8893043-8898858 FORWARD LENGTH=818	NONE	NONE	NONE
Chr4:9634650-9634849	hypo	0	7	77	0.044	0.0094	4.7071	AT4G17140	-	protein_coding_gene	Symbols: | pleckstrin homology (PH) domain-containing protein | chr4:9613617-9636618 REVERSE LENGTH=4216	NONE	NONE	NONE
Chr5:10008600-10008799	hypo	0	7	74	0.0579	0.002	29.4752	AT5G27970	+	protein_coding_gene	Symbols: | ARM repeat superfamily protein | chr5:10004720-10015429 FORWARD LENGTH=1630	NONE	NONE	NONE
Chr5:10214400-10214599	hypo	0	7	75	0.4461	0.2221	2.0088	NONE	NONE	NONE	NONE	NONE	NONE	AT5G28237-AT5G28288
Chr5:10236600-10236899	hypo	1	12	65	0.3894	0.1761	2.211	NONE	NONE	NONE	NONE	NONE	NONE	AT5G28237-AT5G28288
Chr5:10269200-10269399	hypo	0	7	51	0.3367	0.1404	2.3988	NONE	NONE	NONE	NONE	AT5TE37495	RC/Helitron	NONE
Chr5:10274300-10274599	hypo	0	12	68	0.4191	0.1158	3.619	NONE	NONE	NONE	NONE	AT5TE37525	DNA/HAT	NONE
Chr5:10405550-10405749	hypo	0	9	49	0.5868	0.2724	2.1541	NONE	NONE	NONE	NONE	AT5TE37975	LTR/Copia	NONE
Chr5:10644300-10644499	hypo	0	7	35	0.381	0.2014	1.8915	NONE	NONE	NONE	NONE	AT5TE38760	DNA/MuDR	NONE
Chr5:10882650-10882949	hypo	0	9	92	0.1719	0.069	2.4902	NONE	NONE	NONE	NONE	NONE	NONE	AT5G28850-AT5G28885
Chr5:113700-113999	hypo	0	11	51	0.4559	0.1544	2.9521	NONE	NONE	NONE	NONE	AT5TE00400	DNA/MuDR	NONE
Chr5:1162200-1162399	hypo	0	7	102	0.0356	0.0045	7.9165	AT5G04230	+	protein_coding_gene	Symbols: PAL3, ATPAL3 | phenyl alanine ammonia-lyase 3 | chr5:1160831-1163707 FORWARD LENGTH=694	NONE	NONE	NONE
Chr5:12075600-12075849	hypo	0	8	82	0.2363	0.0636	3.7178	NONE	NONE	NONE	NONE	NONE	NONE	AT5G31412-AT5G32440
Chr5:12540150-12540449	hypo	0	9	100	0.147	0.0558	2.6318	NONE	NONE	NONE	NONE	NONE	NONE	AT5G33210-AT5G33280
Chr5:13054600-13054799	hypo	0	8	69	0.1671	0.0733	2.2798	NONE	NONE	NONE	NONE	AT5TE46425	DNA/MuDR	NONE
Chr5:13223400-13223599	hypo	0	10	57	0.2952	0.1372	2.1512	AT5G34905	+	protein_coding_gene	Symbols: | Protein of unknown function (DUF784) | chr5:13223133-13223480 FORWARD LENGTH=115	AT5TE46985	RC/Helitron	NONE
Chr5:13545350-13545599	hypo	0	8	78	0.2219	0.1014	2.1869	NONE	NONE	NONE	NONE	AT5TE48075	DNA/Harbinger	NONE
Chr5:13891100-13891449	hypo	0	13	110	0.1971	0.0068	29.008	NONE	NONE	NONE	NONE	NONE	NONE	AT5G35715-AT5G35730
Chr5:14189950-14190299	hypo	0	10	108	0.1639	0.0366	4.4736	NONE	NONE	NONE	NONE	AT5TE50700	RC/Helitron	NONE
Chr5:14214750-14215049	hypo	0	9	77	0.3793	0.2025	1.8736	NONE	NONE	NONE	NONE	AT5TE50805	RC/Helitron	NONE
Chr5:14287800-14288149	hypo	0	11	143	0.0523	0.0142	3.6777	AT5G36260	-	protein_coding_gene	Symbols: | Eukaryotic aspartyl protease family protein | chr5:14285068-14288179 REVERSE LENGTH=482	NONE	NONE	NONE
Chr5:15006450-15006799	hypo	0	12	98	0.1826	0.0058	31.5839	NONE	NONE	NONE	NONE	AT5TE54140|AT5TE54145	DNA/MuDR;RC/Helitron	NONE
Chr5:15387200-15387449	hypo	0	9	61	0.533	0.2558	2.0836	NONE	NONE	NONE	NONE	AT5TE55655	RC/Helitron	NONE
Chr5:15511950-15512199	hypo	0	9	79	0.1613	0.0494	3.2681	AT5G38730	+	protein_coding_gene	Symbols: | Tetratricopeptide repeat (TPR)-like superfamily protein | chr5:15510901-15512691 FORWARD LENGTH=596	NONE	NONE	NONE
Chr5:15610800-15611099	hypo	0	7	130	0.0292	0.0116	2.5197	AT5G38990	+	protein_coding_gene	Symbols: | Malectin/receptor-like protein kinase family protein | chr5:15608824-15611466 FORWARD LENGTH=880	NONE	NONE	NONE
Chr5:15628750-15628999	hypo	0	8	91	0.0963	0.0072	13.3893	AT5G39040	+	protein_coding_gene	Symbols: ALS1, ATTAP2, TAP2 | transporter associated with antigen processing protein 2 | chr5:15625660-15629621 FORWARD LENGTH=644	NONE	NONE	NONE
Chr5:15767700-15767899	hypo	0	7	84	0.07	0.0252	2.7759	AT5G39400	+	protein_coding_gene	Symbols: ATPTEN1, PTEN1 | Calcium/lipid-binding (CaLB) phosphatase | chr5:15766251-15767922 FORWARD LENGTH=412	NONE	NONE	NONE
Chr5:1613350-1613549	hypo	0	7	69	0.0653	0.0051	12.7561	AT5G05450	+	protein_coding_gene	Symbols: | P-loop containing nucleoside triphosphate hydrolases superfamily protein | chr5:1612077-1615195 FORWARD LENGTH=593	NONE	NONE	NONE
Chr5:16217200-16217399	hypo	0	7	84	0.0246	0.0066	3.7305	AT5G40480	+	protein_coding_gene	Symbols: EMB3012 | embryo defective 3012 | chr5:16213361-16223982 FORWARD LENGTH=1923	NONE	NONE	NONE
Chr5:16546500-16546699	hypo	0	8	74	0.1001	0.0176	5.6852	AT5G41360	+	protein_coding_gene	Symbols: XPB2, ATXPB2 | homolog of Xeroderma pigmentosum complementation group B 2 | chr5:16544574-16549121 FORWARD LENGTH=766	NONE	NONE	NONE
Chr5:16742200-16742549	hypo	0	9	129	0.0436	0.0052	8.3165	AT5G41820	+	protein_coding_gene	Symbols: RGTA2, ATRGTA2 | RAB geranylgeranyl transferase alpha subunit 2 | chr5:16740804-16743433 FORWARD LENGTH=687	NONE	NONE	NONE
Chr5:16995000-16995249	hypo	0	9	76	0.157	0.0041	38.3195	NONE	NONE	NONE	NONE	NONE	NONE	AT5G42500-AT5G42504
Chr5:17218250-17218449	hypo	0	9	91	0.0825	0.0377	2.1891	AT5G42940	-	protein_coding_gene	Symbols: | RING/U-box superfamily protein | chr5:17216649-17219171 REVERSE LENGTH=691	NONE	NONE	NONE
Chr5:17327100-17327399	hypo	0	12	86	0.1831	0.1094	1.6739	NONE	NONE	NONE	NONE	NONE	NONE	AT5G43150-AT5G43160
Chr5:17360950-17361199	hypo	0	7	106	0.1044	0.0314	3.3283	AT5G43270	-	protein_coding_gene	Symbols: SPL2 | squamosa promoter binding protein-like 2 | chr5:17360527-17362143 REVERSE LENGTH=419	NONE	NONE	NONE
Chr5:17421200-17421449	hypo	1	9	111	0.0958	0.0433	2.2114	AT5G43380	-	protein_coding_gene	Symbols: TOPP6 | type one serine/threonine protein phosphatase 6 | chr5:17420297-17421826 REVERSE LENGTH=331	NONE	NONE	NONE
Chr5:17764000-17764199	hypo	0	9	90	0.0674	0.024	2.8046	AT5G44150	-	protein_coding_gene	Symbols: | unknown protein; FUNCTIONS IN: molecular_function unknown; INVOLVED IN: biological_process unknown; LOCATED IN: chloroplast; EXPRESSED IN: 18 plant structures; EXPRESSED DURING: 13 growth stages; Has 35333 Blast hits to 34131 proteins in 2444 species: Archae - 798; Bacteria - 22429; Metazoa - 974; Fungi - 991; Plants - 531; Viruses - 0; Other Eukaryotes - 9610 (source: NCBI BLink). | c…	NONE	NONE	NONE
Chr5:17853650-17853849	hypo	1	10	80	0.1139	0.0482	2.3627	AT5G44316	+	protein_coding_gene	Symbols: | Stabilizer of iron transporter SufD superfamily protein | chr5:17852911-17854521 FORWARD LENGTH=470	NONE	NONE	NONE
Chr5:17859450-17859699	hypo	0	9	98	0.0746	0.0135	5.505	AT5G44340	-	protein_coding_gene	Symbols: TUB4 | tubulin beta chain 4 | chr5:17859442-17860994 REVERSE LENGTH=444	NONE	NONE	NONE
Chr5:17930700-17930999	hypo	1	17	123	0.1306	0.0694	1.8826	AT5G44510	-	protein_coding_gene	Symbols: TAO1 | target of AVRB operation1 | chr5:17929673-17934188 REVERSE LENGTH=1187	NONE	NONE	NONE
Chr5:18033250-18033599	hypo	0	8	158	0.025	0.0034	7.3045	AT5G44700	-	protein_coding_gene	Symbols: EDA23, GSO2 | Leucine-rich repeat transmembrane protein kinase | chr5:18033049-18036894 REVERSE LENGTH=1252	NONE	NONE	NONE
Chr5:18089500-18089699	hypo	0	7	40	0.0567	0.0045	12.5093	AT5G44800	-	protein_coding_gene	Symbols: CHR4, PKR1 | chromatin remodeling 4 | chr5:18083659-18092162 REVERSE LENGTH=2223	NONE	NONE	NONE
Chr5:18552850-18553199	hypo	0	12	145	0.047	0.0036	12.9175	AT5G45730	+	protein_coding_gene	Symbols: | Cysteine/Histidine-rich C1 domain family protein | chr5:18551976-18553658 FORWARD LENGTH=560	NONE	NONE	NONE
Chr5:18886000-18886199	hypo	0	8	76	0.1112	0.0554	2.0059	AT5G46550	-	protein_coding_gene	Symbols: | DNA-binding bromodomain-containing protein | chr5:18884439-18886503 REVERSE LENGTH=494	NONE	NONE	NONE
Chr5:19006850-19007049	hypo	0	7	72	0.1754	0.0672	2.6085	AT5G46840	+	protein_coding_gene	Symbols: | RNA-binding (RRM/RBD/RNP motifs) family protein | chr5:19005651-19007609 FORWARD LENGTH=501	NONE	NONE	NONE
Chr5:19118900-19119249	hypo	0	8	153	0.0396	0.0181	2.1903	AT5G47070	-	protein_coding_gene	Symbols: | Protein kinase superfamily protein | chr5:19118683-19120528 REVERSE LENGTH=410	NONE	NONE	NONE
Chr5:19253000-19253299	hypo	1	12	143	0.0701	0.0166	4.2131	AT5G47460	-	protein_coding_gene	Symbols: | Pentatricopeptide repeat (PPR) superfamily protein | chr5:19252463-19254193 REVERSE LENGTH=576	NONE	NONE	NONE
Chr5:19564500-19564849	hypo	0	15	110	0.0626	0.0071	8.784	AT5G48270	-	protein_coding_gene	Symbols: | Plant protein of unknown function (DUF868) | chr5:19564744-19565712 REVERSE LENGTH=322	NONE	NONE	NONE
Chr5:19630200-19630399	hypo	0	7	85	0.0473	0.0196	2.4142	AT5G48440	-	protein_coding_gene	Symbols: | FAD-dependent oxidoreductase family protein | chr5:19629932-19632588 REVERSE LENGTH=459	NONE	NONE	NONE
Chr5:19660000-19660199	hypo	0	7	51	0.1374	0.0604	2.2756	AT5G48515	-	protein_coding_gene	Symbols: | Putative membrane lipoprotein | chr5:19659857-19660201 REVERSE LENGTH=91	NONE	NONE	NONE
Chr5:19941950-19942299	hypo	0	9	152	0.0369	0.0052	7.0291	AT5G49180	-	protein_coding_gene	Symbols: | Plant invertase/pectin methylesterase inhibitor superfamily | chr5:19940783-19942876 REVERSE LENGTH=571	NONE	NONE	NONE
Chr5:20250700-20250899	hypo	1	7	85	0.0737	0.0348	2.1198	AT5G49830	-	protein_coding_gene	Symbols: EXO84B | exocyst complex component 84B | chr5:20250803-20254766 REVERSE LENGTH=752	NONE	NONE	NONE
Chr5:20251250-20251449	hypo	0	15	90	0.1218	0.0605	2.0127	AT5G49830	-	protein_coding_gene	Symbols: EXO84B | exocyst complex component 84B | chr5:20250803-20254766 REVERSE LENGTH=752	NONE	NONE	NONE
Chr5:20284500-20284899	hypo	0	15	159	0.096	0.0263	3.6481	AT5G49880	+	protein_coding_gene	Symbols: | mitotic checkpoint family protein | chr5:20282305-20287775 FORWARD LENGTH=726	NONE	NONE	NONE
Chr5:20448750-20448949	hypo	0	9	95	0.1201	0.0536	2.2398	AT5G50230	-	protein_coding_gene	Symbols: | Transducin/WD40 repeat-like superfamily protein | chr5:20448632-20450855 REVERSE LENGTH=509	NONE	NONE	NONE
Chr5:20819300-20819599	hypo	0	12	104	0.0493	0.0066	7.4537	AT5G51200	+	protein_coding_gene	Symbols: | Protein of unknown function (DUF3414) | chr5:20804926-20819408 FORWARD LENGTH=1838	NONE	NONE	NONE
Chr5:21459600-21459949	hypo	0	13	127	0.0495	0.0052	9.505	AT5G52910	-	protein_coding_gene	Symbols: ATIM | timeless family protein | chr5:21457774-21463159 REVERSE LENGTH=1141	NONE	NONE	NONE
Chr5:21472850-21473049	hypo	0	7	94	0.0348	0.0064	5.4438	AT5G52940	+	protein_coding_gene	Symbols: | Protein of unknown function (DUF295) | chr5:21472301-21473389 FORWARD LENGTH=362	NONE	NONE	NONE
Chr5:21610800-21611149	hypo	0	11	106	0.0777	0.0073	10.7143	NONE	NONE	NONE	NONE	NONE	NONE	AT5G53280-AT5G53290
Chr5:22077450-22077649	hypo	0	10	89	0.1418	0.0679	2.0884	AT5G54380	-	protein_coding_gene	Symbols: THE1 | protein kinase family protein | chr5:22077313-22079880 REVERSE LENGTH=855	NONE	NONE	NONE
Chr5:2211250-2211499	hypo	0	13	114	0.065	0.0066	9.88	AT5G07130	+	protein_coding_gene	Symbols: LAC13 | laccase 13 | chr5:2210567-2212525 FORWARD LENGTH=569	NONE	NONE	NONE
Chr5:22452800-22453049	hypo	1	7	91	0.0529	0.0147	3.5997	AT5G55390	-	protein_coding_gene	Symbols: EDM2 | ENHANCED DOWNY MILDEW 2 | chr5:22448152-22454414 REVERSE LENGTH=1297	NONE	NONE	NONE
Chr5:22628900-22629149	hypo	0	12	120	0.0916	0.0509	1.799	NONE	NONE	NONE	NONE	AT5TE81425	Unassigned	NONE
Chr5:22950900-22951249	hypo	0	18	140	0.1276	0.0564	2.2599	AT5G56730	-	protein_coding_gene	Symbols: | Insulinase (Peptidase family M16) protein | chr5:22946906-22952576 REVERSE LENGTH=956	NONE	NONE	NONE
Chr5:23075600-23075849	hypo	0	11	108	0.0755	0.0375	2.0159	AT5G57020	+	protein_coding_gene	Symbols: NMT1, ATNMT1 | myristoyl-CoA:protein N-myristoyltransferase | chr5:23075451-23076755 FORWARD LENGTH=434	NONE	NONE	NONE
Chr5:23506200-23506449	hypo	2	9	111	0.0663	0.0288	2.2989	AT5G58090	-	protein_coding_gene	Symbols: | O-Glycosyl hydrolases family 17 protein | chr5:23505556-23507193 REVERSE LENGTH=477	NONE	NONE	NONE
Chr5:2400450-2400749	hypo	0	10	94	0.0345	0.0068	5.0674	AT5G07580	+	protein_coding_gene	Symbols: | Integrase-type DNA-binding superfamily protein | chr5:2399525-2400349 FORWARD LENGTH=274	NONE	NONE	NONE
Chr5:24190700-24190999	hypo	0	7	139	0.0172	0.0028	6.202	AT5G60070	-	protein_coding_gene	Symbols: | ankyrin repeat family protein | chr5:24190440-24192570 REVERSE LENGTH=548	NONE	NONE	NONE
Chr5:24599100-24599299	hypo	0	7	64	0.1255	0.0603	2.0824	AT5G61140	+	protein_coding_gene	Symbols: | U5 small nuclear ribonucleoprotein helicase | chr5:24589999-24603311 FORWARD LENGTH=2146	NONE	NONE	NONE
Chr5:24703450-24703749	hypo	0	9	75	0.4353	0.195	2.2318	NONE	NONE	NONE	NONE	AT5TE88895	DNA	NONE
Chr5:2482300-2482549	hypo	0	7	95	0.0567	0.0065	8.678	AT5G07780	+	protein_coding_gene	Symbols: | Actin-binding FH2 (formin homology 2) family protein | chr5:2479707-2482638 FORWARD LENGTH=464	NONE	NONE	NONE
Chr5:24866100-24866299	hypo	0	8	78	0.119	0.0557	2.136	AT5G61930	-	protein_coding_gene	Symbols: APO3 | Arabidopsis thaliana protein of unknown function (DUF794) | chr5:24866230-24867665 REVERSE LENGTH=402	NONE	NONE	NONE
Chr5:25361000-25361199	hypo	0	8	44	0.436	0.2168	2.0107	NONE	NONE	NONE	NONE	AT5TE91220|AT5TE91225	RC/Helitron;DNA/Tc1	NONE
Chr5:2656000-2656349	hypo	0	9	102	0.084	0.0024	35.0727	NONE	NONE	NONE	NONE	NONE	NONE	AT5G08250-AT5G08260
Chr5:2904800-2904999	hypo	0	7	79	0.0759	0.0309	2.4603	AT5G09350	-	protein_coding_gene	Symbols: PI-4KBETA2, PI4KBETA2 | phosphatidylinositol 4-OH kinase beta2 | chr5:2899365-2905610 REVERSE LENGTH=1116	NONE	NONE	NONE
Chr5:3035300-3035499	hypo	0	7	90	0.0835	0.033	2.528	AT5G09770	-	protein_coding_gene	Symbols: | Ribosomal protein L17 family protein | chr5:3035267-3036518 REVERSE LENGTH=160	NONE	NONE	NONE
Chr5:354600-354799	hypo	0	10	43	0.474	0.2073	2.2869	NONE	NONE	NONE	NONE	AT5TE01245	RC/Helitron	NONE
Chr5:3571900-3572149	hypo	0	7	105	0.051	0.0215	2.3784	AT5G11210	-	protein_coding_gene	Symbols: ATGLR2.5, GLR2.5 | glutamate receptor 2.5 | chr5:3571214-3574537 REVERSE LENGTH=829	NONE	NONE	NONE
Chr5:3648650-3648899	hypo	2	10	119	0.0713	0.0322	2.2146	AT5G11430	+	protein_coding_gene	Symbols: | SPOC domain / Transcription elongation factor S-II protein | chr5:3648469-3652256 FORWARD LENGTH=873	NONE	NONE	NONE
Chr5:368000-368349	hypo	0	16	122	0.129	0.0336	3.8358	AT5G01950	-	protein_coding_gene	Symbols: | Leucine-rich repeat protein kinase family protein | chr5:365040-369532 REVERSE LENGTH=951	NONE	NONE	NONE
Chr5:3813650-3813849	hypo	2	7	88	0.0531	0.0235	2.2581	AT5G11840	-	protein_coding_gene	Symbols: | Protein of unknown function (DUF1230) | chr5:3813610-3814805 REVERSE LENGTH=265	NONE	NONE	NONE
Chr5:4044750-4044999	hypo	0	7	103	0.0576	0.0208	2.7757	AT5G12470	-	protein_coding_gene	Symbols: | Protein of unknown function (DUF3411) | chr5:4044950-4047290 REVERSE LENGTH=386	NONE	NONE	NONE
Chr5:4731800-4731999	hypo	0	7	69	0.0834	0.0257	3.2509	AT5G14680	-	protein_coding_gene	Symbols: | Adenine nucleotide alpha hydrolases-like superfamily protein | chr5:4731620-4733025 REVERSE LENGTH=175	NONE	NONE	NONE
Chr5:4816750-4817099	hypo	0	12	176	0.0384	0.0023	16.4934	AT5G14880	+	protein_coding_gene	Symbols: | Potassium transporter family protein | chr5:4814244-4817667 FORWARD LENGTH=781	NONE	NONE	NONE
Chr5:5065250-5065549	hypo	0	11	73	0.2428	0.0071	34.0745	NONE	NONE	NONE	NONE	NONE	NONE	AT5G15560-AT5G15570
Chr5:511400-511749	hypo	0	9	133	0.0465	0.0039	11.878	AT5G02390	-	protein_coding_gene	Symbols: | Protein of unknown function (DUF3741) | chr5:508764-511710 REVERSE LENGTH=835	NONE	NONE	NONE
Chr5:5529100-5529299	hypo	0	8	74	0.0906	0.0172	5.2528	AT5G16810	-	protein_coding_gene	Symbols: | Protein kinase superfamily protein | chr5:5526860-5529878 REVERSE LENGTH=418	NONE	NONE	NONE
Chr5:5563050-5563349	hypo	0	8	133	0.1041	0.0473	2.2026	AT5G16910	+	protein_coding_gene	Symbols: ATCSLD2, CSLD2 | cellulose-synthase like D2 | chr5:5561679-5565290 FORWARD LENGTH=1145	NONE	NONE	NONE
Chr5:5608300-5608649	hypo	0	8	155	0.0271	0.006	4.4979	AT5G17050	-	protein_coding_gene	Symbols: UGT78D2 | UDP-glucosyl transferase 78D2 | chr5:5607828-5609392 REVERSE LENGTH=460	NONE	NONE	NONE
Chr5:5907250-5907549	hypo	0	8	68	0.1829	0.0151	12.1193	NONE	NONE	NONE	NONE	NONE	NONE	AT5G17860-AT5G17870
Chr5:6109700-6109949	hypo	0	9	49	0.407	0.1725	2.359	NONE	NONE	NONE	NONE	AT5TE22130	RC/Helitron	NONE
Chr5:6205000-6205199	hypo	0	7	74	0.0636	0.0042	14.9784	AT5G18630	+	protein_coding_gene	Symbols: | alpha/beta-Hydrolases superfamily protein | chr5:6202965-6205448 FORWARD LENGTH=358	NONE	NONE	NONE
Chr5:6676450-6676749	hypo	0	8	121	0.056	0.0244	2.2905	AT5G19740	+	protein_coding_gene	Symbols: | Peptidase M28 family protein | chr5:6673986-6676767 FORWARD LENGTH=681	NONE	NONE	NONE
Chr5:6970250-6970599	hypo	0	13	129	0.0752	0.0365	2.0622	AT5G20610	+	protein_coding_gene	Symbols: | unknown protein; BEST Arabidopsis thaliana protein match is: unknown protein (TAIR:AT5G26160.1); Has 918 Blast hits to 759 proteins in 180 species: Archae - 6; Bacteria - 105; Metazoa - 264; Fungi - 89; Plants - 167; Viruses - 5; Other Eukaryotes - 282 (source: NCBI BLink). | chr5:6969184-6972794 FORWARD LENGTH=1164	NONE	NONE	NONE
Chr5:7210100-7210349	hypo	0	7	94	0.0729	0.0346	2.1069	AT5G21222	+	protein_coding_gene	Symbols: | protein kinase family protein | chr5:7209422-7213700 FORWARD LENGTH=831	NONE	NONE	NONE
Chr5:7363050-7363249	hypo	0	7	91	0.098	0.0402	2.4349	AT5G22220	+	protein_coding_gene	Symbols: E2F1, E2FB, ATE2FB | E2F transcription factor 1 | chr5:7360749-7364120 FORWARD LENGTH=469	NONE	NONE	NONE
Chr5:745000-745199	hypo	0	7	62	0.4945	0.2341	2.1124	NONE	NONE	NONE	NONE	AT5TE02710|AT5TE02715|AT5TE02720	DNA/HAT;RC/Helitron;RC/Helitron	NONE
Chr5:7594700-7594949	hypo	0	7	102	0.0536	0.0232	2.311	AT5G22780	-	protein_coding_gene	Symbols: | Adaptor protein complex AP-2, alpha subunit | chr5:7590100-7597828 REVERSE LENGTH=1013	NONE	NONE	NONE
Chr5:7713550-7713749	hypo	0	8	60	0.195	0.0645	3.0232	NONE	NONE	NONE	NONE	AT5TE27905|AT5TE27910	RC/Helitron;RC/Helitron	NONE
Chr5:7766400-7766749	hypo	0	20	149	0.0763	0.0264	2.8854	AT5G23110	+	protein_coding_gene	Symbols: | Zinc finger, C3HC4 type (RING finger) family protein | chr5:7758307-7775509 FORWARD LENGTH=4706	NONE	NONE	NONE
Chr5:7766950-7767299	hypo	0	13	139	0.0681	0.0171	3.978	AT5G23110	+	protein_coding_gene	Symbols: | Zinc finger, C3HC4 type (RING finger) family protein | chr5:7758307-7775509 FORWARD LENGTH=4706	NONE	NONE	NONE
Chr5:7901700-7902249	hypo	0	25	183	0.0714	0.0037	19.2679	NONE	NONE	NONE	NONE	NONE	NONE	AT5G23430-AT5G23440
Chr5:795700-796049	hypo	0	11	140	0.066	0.0055	11.9591	AT5G03290	+	protein_coding_gene	Symbols: IDH-V | isocitrate dehydrogenase V | chr5:794043-795939 FORWARD LENGTH=374	NONE	NONE	NONE
Chr5:8015050-8015349	hypo	1	8	98	0.0594	0.0175	3.3876	AT5G23770	-	protein_coding_gene	Symbols: DUF8, ATDUF8 | DOMAIN OF UNKNOWN FUNCTION 724 8 | chr5:8014513-8016106 REVERSE LENGTH=421	NONE	NONE	NONE
Chr5:8365150-8365449	hypo	0	11	72	0.1538	0.0186	8.2564	NONE	NONE	NONE	NONE	AT5TE30245|AT5TE30250	LTR/Copia;LTR/Copia	NONE
Chr5:8400800-8400999	hypo	0	7	60	0.2742	0.1338	2.0498	NONE	NONE	NONE	NONE	NONE	NONE	AT5G24550-AT5G24560
Chr5:8485200-8485449	hypo	0	12	103	0.0791	0.0246	3.2222	AT5G24740	-	protein_coding_gene	Symbols: | Protein of unknown function (DUF1162) | chr5:8470073-8489703 REVERSE LENGTH=3464	NONE	NONE	NONE
Chr5:8496500-8496699	hypo	0	7	37	0.0725	0.0049	14.9328	AT5G24760	-	protein_coding_gene	Symbols: | GroES-like zinc-binding dehydrogenase family protein | chr5:8495035-8497245 REVERSE LENGTH=381	NONE	NONE	NONE
Chr5:8552200-8552649	hypo	0	27	145	0.0732	0.0032	23.062	AT5G24879	-	protein_coding_gene	Symbols: | unknown protein; Has 30201 Blast hits to 17322 proteins in 780 species: Archae - 12; Bacteria - 1396; Metazoa - 17338; Fungi - 3422; Plants - 5037; Viruses - 0; Other Eukaryotes - 2996 (source: NCBI BLink). | chr5:8552491-8552604 REVERSE LENGTH=37	NONE	NONE	NONE
Chr5:8656950-8657299	hypo	0	15	102	0.1306	0.0041	31.8303	NONE	NONE	NONE	NONE	NONE	NONE	AT5G25102-AT5G25110
Chr5:9105100-9105399	hypo	0	7	152	0.0335	0.0052	6.4354	AT5G26060	-	protein_coding_gene	Symbols: | Plant self-incompatibility protein S1 family | chr5:9105013-9105477 REVERSE LENGTH=154	NONE	NONE	NONE
Chr5:9265500-9265699	hypo	0	9	82	0.0972	0.0463	2.0991	AT5G26570	+	protein_coding_gene	Symbols: PWD, OK1, ATGWD3 | catalytics;carbohydrate kinases;phosphoglucan, water dikinases | chr5:9261580-9267526 FORWARD LENGTH=1196	NONE	NONE	NONE
Chr5:9297700-9297899	hypo	0	7	60	0.0993	0.0066	15.0841	NONE	NONE	NONE	NONE	AT5TE33645	DNA/MuDR	NONE
Chr5:930200-930449	hypo	0	7	114	0.0676	0.0303	2.2301	AT5G03640	+	protein_coding_gene	Symbols: | Protein kinase superfamily protein | chr5:927915-930781 FORWARD LENGTH=926	NONE	NONE	NONE
Chr5:9346150-9346349	hypo	0	7	43	0.3408	0.1021	3.3386	NONE	NONE	NONE	NONE	AT5TE33855	DNA/MuDR	NONE
Chr5:9575950-9576299	hypo	0	9	77	0.1693	0.0061	27.8829	NONE	NONE	NONE	NONE	NONE	NONE	AT5G27210-AT5G27220
Chr5:9911000-9911449	hypo	0	14	90	0.1414	0.0127	11.1411	NONE	NONE	NONE	NONE	AT5TE36095	RC/Helitron	NONE
Chr5:9969200-9969399	hypo	0	7	62	0.0813	0.0078	10.4889	NONE	NONE	NONE	NONE	NONE	NONE	AT5G27930-AT5G27940

## Sheet: ros1-4
List of DMRs in ros1-4 identified by whole genome bisulfite sequencing.
Region	type	DmC-hyper	DmC-hypo	total-C	all-methy1	all-methy2	foldchange	overlap-gene	Strand	Gene_type	GeneAnnot	overlap-TE	TEFamily	Intergenic
Chr1:10006300-10006499	hyper	8	0	83	0.0468	0.1494	3.1884	AT1G28460	+	protein_coding_gene	Symbols: AGL59 | AGAMOUS-like 59 | chr1:10006230-10006778 FORWARD LENGTH=182	NONE	NONE	NONE
Chr1:10007650-10007949	hyper	7	0	130	0.0537	0.1312	2.4441	NONE	NONE	NONE	NONE	AT1TE32270	LINE/L1	NONE
Chr1:10015250-10015599	hyper	17	0	84	0.0035	0.27	76.9463	NONE	NONE	NONE	NONE	NONE	NONE	AT1G28480-AT1G28490
Chr1:10037150-10037499	hyper	9	1	139	0.0072	0.0404	5.5719	AT1G28550	-	protein_coding_gene	Symbols: AtRABA1i, RABA1i | RAB GTPase homolog A1I | chr1:10036966-10037698 REVERSE LENGTH=218	NONE	NONE	NONE
Chr1:10050700-10050949	hyper	7	0	80	0.057	0.3045	5.3391	NONE	NONE	NONE	NONE	NONE	NONE	AT1G28590-AT1G28600
Chr1:10078600-10078949	hyper	12	1	176	0.0098	0.033	3.3808	AT1G28680	+	protein_coding_gene	Symbols: | HXXXD-type acyl-transferase family protein | chr1:10078222-10079763 FORWARD LENGTH=451	NONE	NONE	NONE
Chr1:10080600-10080949	hyper	10	0	146	0.0503	0.1243	2.473	AT1G28690	-	protein_coding_gene	Symbols: | Tetratricopeptide repeat (TPR)-like superfamily protein | chr1:10080042-10081604 REVERSE LENGTH=520	NONE	NONE	NONE
Chr1:10144400-10145149	hyper	61	0	207	0.0507	0.3227	6.3654	NONE	NONE	NONE	NONE	AT1TE32715|AT1TE32720	DNA/MuDR;DNA/MuDR	NONE
Chr1:10160350-10160999	hyper	24	2	109	0.0495	0.2525	5.103	NONE	NONE	NONE	NONE	AT1TE32790|AT1TE32795	RC/Helitron;RC/Helitron	NONE
Chr1:10163250-10163549	hyper	7	0	159	0.0038	0.0349	9.2158	AT1G29090	-	protein_coding_gene	Symbols: | Cysteine proteinases superfamily protein | chr1:10163103-10164385 REVERSE LENGTH=355	NONE	NONE	NONE
Chr1:10164700-10164949	hyper	8	0	40	0.0023	0.2353	102.588	NONE	NONE	NONE	NONE	NONE	NONE	AT1G29090-AT1G29100
Chr1:10167500-10167799	hyper	10	0	100	0.0009	0.1251	140.525	NONE	NONE	NONE	NONE	AT1TE32815	LTR/Gypsy	NONE
Chr1:10172650-10172949	hyper	9	0	158	0.0075	0.0539	7.1336	AT1G29110	+	protein_coding_gene	Symbols: | Cysteine proteinases superfamily protein | chr1:10171683-10173071 FORWARD LENGTH=334	NONE	NONE	NONE
Chr1:10238850-10239349	hyper	30	0	148	0.0425	0.3031	7.1285	NONE	NONE	NONE	NONE	AT1TE33070|AT1TE33075	RC/Helitron;RC/Helitron	NONE
Chr1:10307600-10307899	hyper	8	0	111	0.04	0.0881	2.2009	AT1G29460	-	protein_coding_gene	Symbols: | SAUR-like auxin-responsive protein family | chr1:10307609-10308055 REVERSE LENGTH=148	NONE	NONE	NONE
Chr1:10349300-10349599	hyper	8	1	100	0.104	0.2246	2.1608	AT1G29630	+	protein_coding_gene	Symbols: | 5'-3' exonuclease family protein | chr1:10349587-10353538 FORWARD LENGTH=665	AT1TE33465	DNA/MuDR	NONE
Chr1:10363050-10363449	hyper	28	0	135	0.1868	0.4243	2.2707	NONE	NONE	NONE	NONE	AT1TE33490	LINE/L1	NONE
Chr1:10383400-10383749	hyper	11	0	102	0.1491	0.2862	1.92	NONE	NONE	NONE	NONE	AT1TE33555	RC/Helitron	NONE
Chr1:10420950-10421149	hyper	7	0	53	0.0029	0.2113	72.8993	NONE	NONE	NONE	NONE	NONE	NONE	AT1G29750-AT1G29760
Chr1:10472800-10472999	hyper	7	0	108	0.0236	0.0597	2.5279	AT1G29910	-	protein_coding_gene	Symbols: CAB3, AB180, LHCB1.2 | chlorophyll A/B binding protein 3 | chr1:10472443-10473246 REVERSE LENGTH=267	NONE	NONE	NONE
Chr1:10518000-10518299	hyper	11	0	32	0	0.375	37.5	NONE	NONE	NONE	NONE	NONE	NONE	AT1G30010-AT1G30016
Chr1:10544900-10545299	hyper	16	0	96	0.0664	0.2043	3.0747	AT1G30060	-	protein_coding_gene	Symbols: | COP1-interacting protein-related | chr1:10545087-10545906 REVERSE LENGTH=176	NONE	NONE	NONE
Chr1:10597450-10597649	hyper	7	0	62	0.0343	0.2418	7.0524	NONE	NONE	NONE	NONE	AT1TE34295|AT1TE34300	RC/Helitron;RC/Helitron	NONE
Chr1:10602350-10602649	hyper	14	0	136	0.0376	0.0892	2.3698	NONE	NONE	NONE	NONE	AT1TE34315	DNA/En-Spm	NONE
Chr1:10701500-10701899	hyper	18	0	99	0.133	0.416	3.1285	NONE	NONE	NONE	NONE	AT1TE34580|AT1TE34585	LTR/Copia;LTR/Copia	NONE
Chr1:10723350-10723599	hyper	9	0	79	0.0949	0.2042	2.1521	NONE	NONE	NONE	NONE	AT1TE34650	LINE/L1	NONE
Chr1:10814000-10814299	hyper	14	0	90	0.1924	0.5301	2.7545	NONE	NONE	NONE	NONE	NONE	NONE	AT1G30520-AT1G30530
Chr1:10852150-10852449	hyper	10	0	28	0.0048	0.2035	42.7273	NONE	NONE	NONE	NONE	AT1TE35055	RC/Helitron	NONE
Chr1:10897250-10897649	hyper	14	0	57	0.0033	0.1669	51.3578	NONE	NONE	NONE	NONE	NONE	NONE	AT1G30710-AT1G30720
Chr1:10917850-10918049	hyper	7	0	49	0.0104	0.1518	14.5681	NONE	NONE	NONE	NONE	NONE	NONE	AT1G30757-AT1G30760
Chr1:10922200-10922399	hyper	7	0	71	0.0387	0.1225	3.1653	NONE	NONE	NONE	NONE	NONE	NONE	AT1G30760-AT1G30780
Chr1:10931850-10932249	hyper	18	0	142	0.0331	0.1827	5.5195	NONE	NONE	NONE	NONE	AT1TE35310|AT1TE35315|AT1TE35320|AT1TE35325	DNA/MuDR;RC/Helitron;DNA;DNA	NONE
Chr1:10932550-10932899	hyper	11	0	94	0.041	0.1248	3.0471	AT1G30790	+	protein_coding_gene	Symbols: | F-box and associated interaction domains-containing protein | chr1:10932713-10933912 FORWARD LENGTH=399	AT1TE35325	DNA	NONE
Chr1:10963950-10964149	hyper	8	0	30	0	0.2939	29.3907	NONE	NONE	NONE	NONE	NONE	NONE	AT1G30825-AT1G30840
Chr1:10964450-10964749	hyper	13	0	88	0.0812	0.2594	3.1948	NONE	NONE	NONE	NONE	NONE	NONE	AT1G30825-AT1G30840
Chr1:11012050-11012449	hyper	16	0	159	0.0165	0.0827	5.0083	NONE	NONE	NONE	NONE	NONE	NONE	AT1G30925-AT1G30930
Chr1:11026750-11027099	hyper	7	0	132	0.0004	0.0531	120.422	NONE	NONE	NONE	NONE	NONE	NONE	AT1G30930-AT1G30950
Chr1:11027250-11027549	hyper	9	0	96	0.0267	0.1274	4.7629	NONE	NONE	NONE	NONE	NONE	NONE	AT1G30930-AT1G30950
Chr1:11032450-11032649	hyper	7	0	39	0.0705	0.2959	4.1992	NONE	NONE	NONE	NONE	NONE	NONE	AT1G30930-AT1G30950
Chr1:11044650-11044849	hyper	9	0	59	0.1643	0.3506	2.1342	AT1G30972	+	protein_coding_gene	Symbols: | Plant thionin family protein | chr1:11044671-11044910 FORWARD LENGTH=79	NONE	NONE	NONE
Chr1:11066650-11067199	hyper	50	0	187	0.1045	0.3199	3.0613	NONE	NONE	NONE	NONE	AT1TE35720|AT1TE35725	LINE/L1;RC/Helitron	NONE
Chr1:11087150-11087349	hyper	7	0	57	0.0024	0.0949	39.2059	AT1G31070	+	protein_coding_gene	Symbols: GlcNAc1pUT1 | N-acetylglucosamine-1-phosphate uridylyltransferase 1 | chr1:11084951-11086334 FORWARD LENGTH=153	NONE	NONE	NONE
Chr1:11109700-11110099	hyper	18	0	91	0.0115	0.2977	25.7758	NONE	NONE	NONE	NONE	NONE	NONE	AT1G31120-AT1G31130
Chr1:11127450-11127649	hyper	7	0	61	0.1164	0.25	2.1477	NONE	NONE	NONE	NONE	NONE	NONE	AT1G31160-AT1G31163
Chr1:11140000-11140299	hyper	11	0	89	0.0032	0.2496	78.1396	NONE	NONE	NONE	NONE	NONE	NONE	AT1G31170-AT1G31175
Chr1:11154950-11155399	hyper	25	0	145	0.005	0.2813	55.7859	NONE	NONE	NONE	NONE	AT1TE36060	RC/Helitron	NONE
Chr1:11170700-11171049	hyper	12	0	84	0.0039	0.2881	73.1813	NONE	NONE	NONE	NONE	AT1TE36105	DNA/Harbinger	NONE
Chr1:11217600-11217849	hyper	8	0	86	0.0041	0.0972	23.7951	AT1G31340	-	protein_coding_gene	Symbols: RUB1, NEDD8, ATRUB1 | related to ubiquitin 1 | chr1:11218076-11219417 REVERSE LENGTH=156	NONE	NONE	NONE
Chr1:11242050-11242349	hyper	12	0	85	0.0577	0.2245	3.8901	NONE	NONE	NONE	NONE	AT1TE36350	DNA/MuDR	NONE
Chr1:11276700-11277049	hyper	10	0	41	0.022	0.3211	14.5909	NONE	NONE	NONE	NONE	NONE	NONE	AT1G31500-AT1G31510
Chr1:11287550-11287799	hyper	7	0	73	0.0971	0.277	2.8538	NONE	NONE	NONE	NONE	AT1TE36510	RC/Helitron	NONE
Chr1:11310300-11310599	hyper	11	0	62	0.1182	0.3904	3.3018	NONE	NONE	NONE	NONE	AT1TE36570	DNA/En-Spm	NONE
Chr1:11324050-11324249	hyper	7	0	80	0.0455	0.1525	3.355	AT1G31640	-	protein_coding_gene	Symbols: AGL92 | AGAMOUS-like 92 | chr1:11322692-11324176 REVERSE LENGTH=464	NONE	NONE	NONE
Chr1:11344550-11344849	hyper	7	0	113	0.0004	0.0303	74.8509	AT1G31690	+	protein_coding_gene	Symbols: | Copper amine oxidase family protein | chr1:11343980-11347767 FORWARD LENGTH=677	NONE	NONE	NONE
Chr1:11357300-11357599	hyper	7	0	75	0.0117	0.0901	7.725	NONE	NONE	NONE	NONE	NONE	NONE	AT1G31720-AT1G31730
Chr1:1139600-1139849	hyper	7	0	44	0.0013	0.2136	163.185	NONE	NONE	NONE	NONE	NONE	NONE	AT1G04250-AT1G04260
Chr1:11407150-11407499	hyper	12	0	89	0.0185	0.2489	13.4928	NONE	NONE	NONE	NONE	AT1TE36890	RC/Helitron	NONE
Chr1:11421900-11422099	hyper	7	0	46	0.1289	0.3638	2.8221	NONE	NONE	NONE	NONE	AT1TE36940|AT1TE36945	DNA/MuDR;DNA	NONE
Chr1:11440700-11440949	hyper	8	0	39	0.002	0.2044	102.83	NONE	NONE	NONE	NONE	NONE	NONE	AT1G31870-AT1G31875
Chr1:11488950-11489199	hyper	9	0	70	0.02	0.2488	12.4413	AT1G31990	+	protein_coding_gene	Symbols: | unknown protein; Has 35333 Blast hits to 34131 proteins in 2444 species: Archae - 798; Bacteria - 22429; Metazoa - 974; Fungi - 991; Plants - 531; Viruses - 0; Other Eukaryotes - 9610 (source: NCBI BLink). | chr1:11488205-11489182 FORWARD LENGTH=325	NONE	NONE	NONE
Chr1:11502650-11502999	hyper	17	0	129	0.0268	0.1222	4.5593	NONE	NONE	NONE	NONE	NONE	NONE	AT1G31990-AT1G32000
Chr1:11512600-11512949	hyper	10	0	138	0.0532	0.1341	2.5211	AT1G32020	-	protein_coding_gene	Symbols: | F-box family protein | chr1:11512552-11513067 REVERSE LENGTH=171	NONE	NONE	NONE
Chr1:11536950-11537299	hyper	14	0	115	0.0865	0.2337	2.7014	NONE	NONE	NONE	NONE	AT1TE37345	LTR/Copia	NONE
Chr1:11569150-11569349	hyper	9	0	87	0.0546	0.1151	2.1087	AT1G32160	+	protein_coding_gene	Symbols: | Protein of unknown function (DUF760) | chr1:11568701-11570241 FORWARD LENGTH=406	NONE	NONE	NONE
Chr1:11580350-11580699	hyper	15	0	133	0.0093	0.0707	7.5806	NONE	NONE	NONE	NONE	AT1TE37490	LTR/Gypsy	NONE
Chr1:11592600-11592899	hyper	10	0	69	0.0027	0.2593	96.7271	NONE	NONE	NONE	NONE	NONE	NONE	AT1G32180-AT1G32190
Chr1:11650150-11650699	hyper	19	0	126	0.0045	0.1529	34.1905	AT1G32290	-	protein_coding_gene	Symbols: | unknown protein; Has 7 Blast hits to 5 proteins in 3 species: Archae - 0; Bacteria - 0; Metazoa - 0; Fungi - 0; Plants - 6; Viruses - 0; Other Eukaryotes - 1 (source: NCBI BLink). | chr1:11650222-11650567 REVERSE LENGTH=80	AT1TE37715|AT1TE37720	RC/Helitron;LTR/Gypsy	NONE
Chr1:11652800-11653149	hyper	12	0	107	0.0328	0.1473	4.4923	AT1G32300	+	protein_coding_gene	Symbols: | D-arabinono-1,4-lactone oxidase family protein | chr1:11651342-11653365 FORWARD LENGTH=595	NONE	NONE	NONE
Chr1:11685800-11686349	hyper	16	0	177	0.0342	0.1655	4.8337	NONE	NONE	NONE	NONE	NONE	NONE	AT1G32380-AT1G32400
Chr1:11688050-11688249	hyper	7	0	90	0.004	0.1148	28.4407	NONE	NONE	NONE	NONE	AT1TE37845|AT1TE37850	LINE/L1;LINE/L1	NONE
Chr1:11695200-11695549	hyper	7	0	110	0.0069	0.0598	8.6352	AT1G32410	+	protein_coding_gene	Symbols: | Vacuolar protein sorting 55 (VPS55) family protein | chr1:11694398-11695297 FORWARD LENGTH=140	NONE	NONE	NONE
Chr1:11734500-11734799	hyper	11	0	103	0.0848	0.2111	2.488	NONE	NONE	NONE	NONE	NONE	NONE	AT1G32450-AT1G32460
Chr1:11734950-11735149	hyper	7	0	40	0.0302	0.2245	7.4456	NONE	NONE	NONE	NONE	AT1TE38030	RC/Helitron	NONE
Chr1:11758950-11759299	hyper	10	0	78	0.0108	0.143	13.282	AT1G32520	-	protein_coding_gene	Symbols: | unknown protein; FUNCTIONS IN: molecular_function unknown; INVOLVED IN: biological_process unknown; LOCATED IN: chloroplast; EXPRESSED IN: 24 plant structures; EXPRESSED DURING: 15 growth stages; Has 143 Blast hits to 142 proteins in 34 species: Archae - 0; Bacteria - 0; Metazoa - 39; Fungi - 0; Plants - 56; Viruses - 0; Other Eukaryotes - 48 (source: NCBI BLink). | chr1:11758422-11759…	NONE	NONE	NONE
Chr1:11804850-11805099	hyper	9	0	67	0.0516	0.2831	5.483	NONE	NONE	NONE	NONE	NONE	NONE	AT1G32640-AT1G32650
Chr1:11817450-11817699	hyper	9	0	53	0.0307	0.3049	9.9412	NONE	NONE	NONE	NONE	AT1TE38300	DNA/HAT	NONE
Chr1:11833950-11834649	hyper	21	0	137	0.0179	0.1804	10.0619	NONE	NONE	NONE	NONE	NONE	NONE	AT1G32710-AT1G32720
Chr1:11839750-11839999	hyper	8	0	42	0.054	0.2281	4.2273	NONE	NONE	NONE	NONE	NONE	NONE	AT1G32720-AT1G32730
Chr1:1184550-1185049	hyper	44	0	158	0.1764	0.4593	2.6044	NONE	NONE	NONE	NONE	AT1TE03860	DNA/Pogo	NONE
Chr1:11861850-11862199	hyper	12	0	111	0.0415	0.1562	3.7619	NONE	NONE	NONE	NONE	AT1TE38445	LTR/Copia	NONE
Chr1:11879400-11879799	hyper	21	0	112	0.0474	0.2785	5.8753	NONE	NONE	NONE	NONE	AT1TE38505	RC/Helitron	NONE
Chr1:11910450-11910699	hyper	7	0	25	0.0059	0.1812	30.5316	NONE	NONE	NONE	NONE	AT1TE38565|AT1TE38570	RC/Helitron;RC/Helitron	NONE
Chr1:11926450-11926799	hyper	18	0	170	0.0064	0.1135	17.792	AT1G32910	+	protein_coding_gene	Symbols: | HXXXD-type acyl-transferase family protein | chr1:11925426-11926908 FORWARD LENGTH=464	NONE	NONE	NONE
Chr1:11940850-11941149	hyper	7	0	98	0.0386	0.074	1.9183	AT1G32940	+	protein_coding_gene	Symbols: ATSBT3.5, SBT3.5 | Subtilase family protein | chr1:11937634-11940856 FORWARD LENGTH=774	NONE	NONE	NONE
Chr1:11950650-11950899	hyper	7	2	132	0.0282	0.0581	2.0587	AT1G32970	-	protein_coding_gene	Symbols: | Subtilisin-like serine endopeptidase family protein | chr1:11948721-11951982 REVERSE LENGTH=734	NONE	NONE	NONE
Chr1:1196650-1196999	hyper	13	0	127	0.0058	0.1065	18.355	NONE	NONE	NONE	NONE	NONE	NONE	AT1G04420-AT1G04430
Chr1:12020150-12020499	hyper	12	0	101	0.0777	0.2773	3.57	NONE	NONE	NONE	NONE	AT1TE38940|AT1TE38945	DNA/En-Spm;RC/Helitron	NONE
Chr1:12055150-12055399	hyper	7	0	75	0.0115	0.2793	24.2275	NONE	NONE	NONE	NONE	NONE	NONE	AT1G33240-AT1G33250
Chr1:12058250-12058599	hyper	8	0	161	0.0483	0.1022	2.1163	AT1G33250	-	protein_coding_gene	Symbols: | Protein of unknown function (DUF604) | chr1:12057524-12059346 REVERSE LENGTH=548	NONE	NONE	NONE
Chr1:12070350-12070699	hyper	19	0	87	0.0023	0.2219	97.4311	AT1G33270	-	protein_coding_gene	Symbols: | Acyl transferase/acyl hydrolase/lysophospholipase superfamily protein | chr1:12068324-12070157 REVERSE LENGTH=369	NONE	NONE	NONE
Chr1:12076450-12076799	hyper	15	0	131	0.0901	0.2406	2.6703	NONE	NONE	NONE	NONE	AT1TE39140	LTR/Gypsy	NONE
Chr1:12077000-12077349	hyper	14	0	63	0.0642	0.2278	3.5496	NONE	NONE	NONE	NONE	NONE	NONE	AT1G33290-AT1G33320
Chr1:12083750-12084099	hyper	17	0	110	0.1113	0.2909	2.6139	NONE	NONE	NONE	NONE	AT1TE39160	RC/Helitron	NONE
Chr1:12088150-12088549	hyper	16	1	180	0.0151	0.0852	5.6564	AT1G33340	+	protein_coding_gene	Symbols: | ENTH/ANTH/VHS superfamily protein | chr1:12087628-12088752 FORWARD LENGTH=374	NONE	NONE	NONE
Chr1:1211500-1211999	hyper	17	0	232	0.0243	0.1005	4.1329	AT1G04470	-	protein_coding_gene	Symbols: | Protein of unknown function (DUF810) | chr1:1211177-1214591 REVERSE LENGTH=1035	NONE	NONE	NONE
Chr1:12128100-12128299	hyper	7	0	87	0.002	0.0598	29.6402	AT1G33440	-	protein_coding_gene	Symbols: | Major facilitator superfamily protein | chr1:12127712-12130327 REVERSE LENGTH=601	NONE	NONE	NONE
Chr1:12130800-12131049	hyper	7	0	71	0.0098	0.1855	18.9253	NONE	NONE	NONE	NONE	AT1TE39335	RC/Helitron	NONE
Chr1:12153750-12154049	hyper	8	0	114	0.0046	0.0356	7.8116	AT1G33500	+	protein_coding_gene	Symbols: | unknown protein; Has 30201 Blast hits to 17322 proteins in 780 species: Archae - 12; Bacteria - 1396; Metazoa - 17338; Fungi - 3422; Plants - 5037; Viruses - 0; Other Eukaryotes - 2996 (source: NCBI BLink). | chr1:12152774-12154680 FORWARD LENGTH=276	NONE	NONE	NONE
Chr1:12166050-12166549	hyper	20	0	155	0.0366	0.1819	4.9662	NONE	NONE	NONE	NONE	AT1TE39490	LINE/L1	NONE
Chr1:12167050-12167499	hyper	26	1	109	0.0969	0.3654	3.7715	NONE	NONE	NONE	NONE	AT1TE39500	DNA/En-Spm	NONE
Chr1:12177150-12177349	hyper	7	0	66	0.0753	0.2152	2.8582	NONE	NONE	NONE	NONE	AT1TE39515	DNA/En-Spm	NONE
Chr1:12183200-12183399	hyper	9	0	61	0.0604	0.2231	3.6944	NONE	NONE	NONE	NONE	AT1TE39530	RC/Helitron	NONE
Chr1:12215000-12215199	hyper	7	0	44	0.1213	0.3939	3.2476	NONE	NONE	NONE	NONE	NONE	NONE	AT1G33700-AT1G33709
Chr1:12218500-12218749	hyper	8	0	40	0.0729	0.348	4.7721	NONE	NONE	NONE	NONE	NONE	NONE	AT1G33700-AT1G33709
Chr1:12228550-12228849	hyper	10	0	86	0.0291	0.228	7.8225	NONE	NONE	NONE	NONE	AT1TE39700|AT1TE39705|AT1TE39710	RC/Helitron;RC/Helitron;RC/Helitron	NONE
Chr1:12248550-12249049	hyper	22	0	150	0.047	0.1727	3.6724	NONE	NONE	NONE	NONE	NONE	NONE	AT1G33780-AT1G33790
Chr1:12251750-12252049	hyper	12	0	86	0.0677	0.1879	2.7765	NONE	NONE	NONE	NONE	AT1TE39795|AT1TE39800	RC/Helitron;DNA/MuDR	NONE
Chr1:12255550-12255749	hyper	7	0	68	0.0907	0.24	2.6449	NONE	NONE	NONE	NONE	NONE	NONE	AT1G33780-AT1G33790
Chr1:12262750-12263099	hyper	24	0	90	0.1558	0.3803	2.4411	NONE	NONE	NONE	NONE	AT1TE39830	DNA/Harbinger	NONE
Chr1:12267250-12267449	hyper	7	0	61	0.0022	0.0911	40.6224	NONE	NONE	NONE	NONE	NONE	NONE	AT1G33810-AT1G33811
Chr1:12276650-12276899	hyper	9	0	79	0.0029	0.1679	58.2586	NONE	NONE	NONE	NONE	NONE	NONE	AT1G33811-AT1G33820
Chr1:12286350-12286649	hyper	7	0	71	0.0417	0.147	3.5202	NONE	NONE	NONE	NONE	AT1TE39915	DNA/MuDR	NONE
Chr1:12296150-12296499	hyper	13	0	35	0	0.3276	32.7586	NONE	NONE	NONE	NONE	NONE	NONE	AT1G33860-AT1G33870
Chr1:12302400-12302949	hyper	15	1	140	0.0319	0.1066	3.3379	AT1G33870	-	protein_coding_gene	Symbols: | P-loop containing nucleoside triphosphate hydrolases superfamily protein | chr1:12301325-12302467 REVERSE LENGTH=252	NONE	NONE	NONE
Chr1:12309400-12309799	hyper	21	0	146	0.005	0.1298	26.1209	AT1G33890	-	protein_coding_gene	Symbols: | Avirulence induced gene (AIG1) family protein | chr1:12308284-12309686 REVERSE LENGTH=334	NONE	NONE	NONE
Chr1:12346700-12347049	hyper	16	0	117	0.0571	0.1357	2.3752	AT1G33960	+	protein_coding_gene	Symbols: AIG1 | P-loop containing nucleoside triphosphate hydrolases superfamily protein | chr1:12346555-12348184 FORWARD LENGTH=353	AT1TE40175|AT1TE40180	DNA/MuDR;DNA/MuDR	NONE
Chr1:12361400-12361949	hyper	39	0	202	0.0814	0.3563	4.3762	NONE	NONE	NONE	NONE	NONE	NONE	AT1G34010-AT1G34020
Chr1:12380350-12380599	hyper	7	0	49	0.009	0.2197	24.4385	NONE	NONE	NONE	NONE	NONE	NONE	AT1G34042-AT1G34046
Chr1:12381100-12381299	hyper	7	0	48	0.0013	0.1005	79.1831	NONE	NONE	NONE	NONE	AT1TE40280	DNA/HAT	NONE
Chr1:12394250-12394499	hyper	8	0	64	0.0083	0.1338	16.1446	AT1G34050	+	protein_coding_gene	Symbols: | Ankyrin repeat family protein | chr1:12393495-12396006 FORWARD LENGTH=573	AT1TE40315	RathE1_cons	NONE
Chr1:12401000-12401449	hyper	20	0	123	0.0414	0.307	7.4199	AT1G34065	-	protein_coding_gene	Symbols: SAMC2 | S-adenosylmethionine carrier 2 | chr1:12398717-12401036 REVERSE LENGTH=345	NONE	NONE	NONE
Chr1:12434900-12435099	hyper	8	0	41	0.0271	0.2405	8.8802	NONE	NONE	NONE	NONE	NONE	NONE	AT1G34140-AT1G34150
Chr1:12435500-12435799	hyper	10	0	21	0.0201	0.5238	26.0159	NONE	NONE	NONE	NONE	NONE	NONE	AT1G34140-AT1G34150
Chr1:12466100-12466399	hyper	13	0	118	0.0941	0.2669	2.8366	NONE	NONE	NONE	NONE	NONE	NONE	AT1G34220-AT1G34245
Chr1:12471750-12472849	hyper	45	0	230	0.0039	0.2492	63.3571	NONE	NONE	NONE	NONE	NONE	NONE	AT1G34220-AT1G34245
Chr1:12475100-12475399	hyper	7	0	77	0.0049	0.1452	29.9154	NONE	NONE	NONE	NONE	AT1TE40615	RC/Helitron	NONE
Chr1:12490600-12490799	hyper	8	0	91	0.0629	0.1355	2.1535	AT1G34260	+	protein_coding_gene	Symbols: FAB1D | FORMS APLOID AND BINUCLEATE CELLS 1A | chr1:12485967-12491799 FORWARD LENGTH=1456	NONE	NONE	NONE
Chr1:12517450-12517699	hyper	9	0	29	0.0786	0.4536	5.7686	NONE	NONE	NONE	NONE	AT1TE40735	RC/Helitron	NONE
Chr1:12524550-12525449	hyper	38	0	339	0.0358	0.1514	4.2227	NONE	NONE	NONE	NONE	AT1TE40760	LINE/L1	NONE
Chr1:12527750-12527999	hyper	10	0	37	0.0023	0.1985	86.5427	NONE	NONE	NONE	NONE	NONE	NONE	AT1G34320-AT1G34340
Chr1:12530350-12530599	hyper	7	0	51	0.0573	0.2293	4.0021	NONE	NONE	NONE	NONE	AT1TE40810	RathE3_cons	NONE
Chr1:12581700-12581999	hyper	13	1	114	0.0625	0.1607	2.5708	NONE	NONE	NONE	NONE	AT1TE41000	RC/Helitron	NONE
Chr1:12585250-12585499	hyper	7	0	110	0.0703	0.1441	2.0504	AT1G34420	+	protein_coding_gene	Symbols: | leucine-rich repeat transmembrane protein kinase family protein | chr1:12584587-12587570 FORWARD LENGTH=966	NONE	NONE	NONE
Chr1:12592050-12592349	hyper	8	0	146	0.1335	0.26	1.947	AT1G34440	-	protein_coding_gene	Symbols: | unknown protein; BEST Arabidopsis thaliana protein match is: unknown protein (TAIR:AT4G05095.1); Has 28 Blast hits to 28 proteins in 2 species: Archae - 0; Bacteria - 0; Metazoa - 0; Fungi - 0; Plants - 28; Viruses - 0; Other Eukaryotes - 0 (source: NCBI BLink). | chr1:12591348-12592737 REVERSE LENGTH=157	NONE	NONE	NONE
Chr1:12639300-12639649	hyper	12	0	105	0.0082	0.1517	18.4154	NONE	NONE	NONE	NONE	NONE	NONE	AT1G34540-AT1G34550
Chr1:12640850-12641099	hyper	12	0	79	0.1148	0.3037	2.6466	NONE	NONE	NONE	NONE	AT1TE41280	LTR/Copia	NONE
Chr1:12642450-12642799	hyper	14	0	86	0.0054	0.2191	40.53	NONE	NONE	NONE	NONE	AT1TE41285	LTR/Copia	NONE
Chr1:12646100-12646299	hyper	7	0	48	0.0921	0.251	2.7253	NONE	NONE	NONE	NONE	AT1TE41295|AT1TE41300	RathE2_cons;RC/Helitron	NONE
Chr1:12663900-12664549	hyper	46	0	232	0.0837	0.3371	4.025	NONE	NONE	NONE	NONE	AT1TE41345	LTR/Gypsy	NONE
Chr1:12711450-12711749	hyper	20	0	117	0.0993	0.2502	2.5192	NONE	NONE	NONE	NONE	NONE	NONE	AT1G34670-AT1G34750
Chr1:12738950-12739149	hyper	8	0	52	0.167	0.3788	2.2687	NONE	NONE	NONE	NONE	AT1TE41525	DNA/MuDR	NONE
Chr1:12842850-12843199	hyper	11	3	145	0.02	0.0837	4.1837	NONE	NONE	NONE	NONE	AT1TE41800	LTR/Copia	NONE
Chr1:12843600-12843899	hyper	11	1	90	0.0401	0.102	2.5466	NONE	NONE	NONE	NONE	AT1TE41800	LTR/Copia	NONE
Chr1:12844500-12845099	hyper	27	0	229	0.0978	0.2365	2.4189	NONE	NONE	NONE	NONE	AT1TE41800	LTR/Copia	NONE
Chr1:12845300-12845749	hyper	23	0	150	0.0602	0.2468	4.1008	NONE	NONE	NONE	NONE	AT1TE41800|AT1TE41805	LTR/Copia;RC/Helitron	NONE
Chr1:12850950-12851249	hyper	8	0	58	0.0461	0.2284	4.9574	NONE	NONE	NONE	NONE	AT1TE41825	DNA/HAT	NONE
Chr1:1286900-1287249	hyper	13	0	68	0.1096	0.2886	2.6342	NONE	NONE	NONE	NONE	AT1TE04205	RC/Helitron	NONE
Chr1:12896500-12896799	hyper	17	0	54	0.0273	0.2686	9.8413	AT1G35210	-	protein_coding_gene	Symbols: | unknown protein; FUNCTIONS IN: molecular_function unknown; INVOLVED IN: biological_process unknown; LOCATED IN: chloroplast; EXPRESSED IN: 14 plant structures; EXPRESSED DURING: 9 growth stages; CONTAINS InterPro DOMAIN/s: Protein of unknown function DUF740 (InterPro:IPR008004); BEST Arabidopsis thaliana protein match is: unknown protein (TAIR:AT1G22470.1); Has 83 Blast hits to 83 prot…	AT1TE41995	DNA/MuDR	NONE
Chr1:12908350-12908749	hyper	26	0	111	0.0153	0.2464	16.1124	NONE	NONE	NONE	NONE	NONE	NONE	AT1G35210-AT1G35220
Chr1:12915150-12915449	hyper	9	0	75	0.0219	0.1163	5.2997	NONE	NONE	NONE	NONE	AT1TE42100	RC/Helitron	NONE
Chr1:12919800-12920349	hyper	31	0	193	0.0827	0.2588	3.1301	NONE	NONE	NONE	NONE	AT1TE42125	RC/Helitron	NONE
Chr1:12922050-12922349	hyper	9	0	77	0.0485	0.2	4.1217	NONE	NONE	NONE	NONE	NONE	NONE	AT1G35230-AT1G35240
Chr1:12922850-12923299	hyper	27	0	128	0.1048	0.2924	2.789	NONE	NONE	NONE	NONE	NONE	NONE	AT1G35230-AT1G35240
Chr1:12923900-12924399	hyper	26	0	147	0.0504	0.2148	4.2594	NONE	NONE	NONE	NONE	NONE	NONE	AT1G35230-AT1G35240
Chr1:12958550-12958999	hyper	17	0	146	0.0427	0.206	4.8285	NONE	NONE	NONE	NONE	NONE	NONE	AT1G35310-AT1G35320
Chr1:12967800-12967999	hyper	7	0	57	0.0434	0.1405	3.2367	NONE	NONE	NONE	NONE	AT1TE42280	DNA/MuDR	NONE
Chr1:12977250-12977499	hyper	11	0	40	0.0278	0.297	10.6662	NONE	NONE	NONE	NONE	NONE	NONE	AT1G35333-AT1G35340
Chr1:12985450-12985699	hyper	7	0	72	0.0483	0.1471	3.0427	NONE	NONE	NONE	NONE	AT1TE42345	RC/Helitron	NONE
Chr1:12994350-12994549	hyper	7	0	41	0.0772	0.3017	3.9092	NONE	NONE	NONE	NONE	NONE	NONE	AT1G35365-AT1G35375
Chr1:12995550-12995949	hyper	20	0	116	0.1056	0.282	2.6716	NONE	NONE	NONE	NONE	NONE	NONE	AT1G35365-AT1G35375
Chr1:13029250-13030149	hyper	47	0	219	0.0168	0.2444	14.5166	NONE	NONE	NONE	NONE	NONE	NONE	AT1G35420-AT1G35430
Chr1:13037500-13037799	hyper	9	0	80	0.0228	0.134	5.8695	NONE	NONE	NONE	NONE	NONE	NONE	AT1G35440-AT1G35460
Chr1:13045100-13045549	hyper	19	0	140	0.0033	0.1729	51.667	NONE	NONE	NONE	NONE	AT1TE42575	RC/Helitron	NONE
Chr1:13050550-13050949	hyper	20	0	102	0.0107	0.2508	23.3867	NONE	NONE	NONE	NONE	NONE	NONE	AT1G35467-AT1G35470
Chr1:13067100-13067549	hyper	26	0	139	0.0016	0.2437	152.931	NONE	NONE	NONE	NONE	NONE	NONE	AT1G35500-AT1G35510
Chr1:13070800-13071049	hyper	8	0	68	0.1267	0.2641	2.0838	NONE	NONE	NONE	NONE	NONE	NONE	AT1G35500-AT1G35510
Chr1:13096550-13096899	hyper	13	1	154	0.0481	0.1093	2.2721	AT1G35530	+	protein_coding_gene	Symbols: | DEAD/DEAH box RNA helicase family protein | chr1:13089994-13097078 FORWARD LENGTH=1324	NONE	NONE	NONE
Chr1:13102900-13103399	hyper	21	0	136	0.0148	0.1431	9.6507	NONE	NONE	NONE	NONE	NONE	NONE	AT1G35530-AT1G35537
Chr1:13104700-13105049	hyper	10	0	129	0.0409	0.227	5.5499	NONE	NONE	NONE	NONE	NONE	NONE	AT1G35530-AT1G35537
Chr1:13119000-13119399	hyper	16	0	75	0.0075	0.3987	53.1628	NONE	NONE	NONE	NONE	AT1TE42850	LINE/L1	NONE
Chr1:13124450-13124649	hyper	7	0	96	0.0267	0.0801	3.0026	AT1G35580	-	protein_coding_gene	Symbols: CINV1 | cytosolic invertase 1 | chr1:13122460-13124808 REVERSE LENGTH=551	NONE	NONE	NONE
Chr1:13144850-13145199	hyper	24	0	125	0.1758	0.4004	2.2772	AT1G35610	-	protein_coding_gene	Symbols: | Cysteine/Histidine-rich C1 domain family protein | chr1:13143150-13144988 REVERSE LENGTH=612	NONE	NONE	NONE
Chr1:13147950-13148299	hyper	13	0	75	0.0103	0.2988	28.8807	NONE	NONE	NONE	NONE	AT1TE42910	DNA	NONE
Chr1:13167350-13167549	hyper	7	0	38	0.0195	0.3013	15.431	NONE	NONE	NONE	NONE	NONE	NONE	AT1G35630-AT1G35660
Chr1:13170800-13171099	hyper	9	0	91	0.0436	0.1804	4.1356	NONE	NONE	NONE	NONE	NONE	NONE	AT1G35630-AT1G35660
Chr1:13220600-13220849	hyper	7	0	59	0.0271	0.1104	4.0815	NONE	NONE	NONE	NONE	AT1TE43195	RC/Helitron	NONE
Chr1:132400-132749	hyper	12	0	136	0.031	0.1072	3.4601	AT1G01340	-	protein_coding_gene	Symbols: ATCNGC10, CNGC10, ACBK1 | cyclic nucleotide gated channel 10 | chr1:132414-135118 REVERSE LENGTH=706	NONE	NONE	NONE
Chr1:13258950-13259299	hyper	13	0	112	0.0066	0.3162	48.0617	NONE	NONE	NONE	NONE	AT1TE43335	DNA/MuDR	NONE
Chr1:13289000-13289299	hyper	9	0	79	0.0638	0.2017	3.1602	NONE	NONE	NONE	NONE	NONE	NONE	AT1G35780-AT1G35820
Chr1:13339700-13339999	hyper	10	0	49	0.0424	0.215	5.0748	AT1G35880	-	protein_coding_gene	Symbols: | unknown protein; Has 251 Blast hits to 234 proteins in 66 species: Archae - 2; Bacteria - 48; Metazoa - 87; Fungi - 9; Plants - 70; Viruses - 0; Other Eukaryotes - 35 (source: NCBI BLink). | chr1:13339851-13341228 REVERSE LENGTH=222	NONE	NONE	NONE
Chr1:13350500-13351099	hyper	22	0	174	0.0623	0.1876	3.0094	NONE	NONE	NONE	NONE	NONE	NONE	AT1G35900-AT1G35910
Chr1:13351700-13351999	hyper	8	0	107	0.0218	0.1936	8.8801	NONE	NONE	NONE	NONE	AT1TE43650|AT1TE43655	LINE/L1;LINE/L1	NONE
Chr1:13353600-13354049	hyper	24	0	124	0.0323	0.2189	6.7738	NONE	NONE	NONE	NONE	AT1TE43670	RC/Helitron	NONE
Chr1:1339350-1339699	hyper	12	0	28	0.0052	0.2844	54.4696	NONE	NONE	NONE	NONE	NONE	NONE	AT1G04770-AT1G04778
Chr1:13417200-13417499	hyper	10	0	75	0.0049	0.1582	32.4842	NONE	NONE	NONE	NONE	NONE	NONE	AT1G35910-AT1G36000
Chr1:13456450-13456799	hyper	12	0	68	0.0709	0.2554	3.6008	NONE	NONE	NONE	NONE	AT1TE44010	RC/Helitron	NONE
Chr1:13477650-13477899	hyper	12	0	72	0.0211	0.1874	8.864	NONE	NONE	NONE	NONE	NONE	NONE	AT1G36070-AT1G36078
Chr1:13498950-13499149	hyper	7	0	49	0.1062	0.2705	2.5462	NONE	NONE	NONE	NONE	NONE	NONE	AT1G36100-AT1G36150
Chr1:13502750-13503099	hyper	16	0	122	0.0426	0.175	4.1039	NONE	NONE	NONE	NONE	AT1TE44195	DNA/En-Spm	NONE
Chr1:13528950-13529299	hyper	8	0	105	0.0064	0.0864	13.5373	AT1G36150	+	protein_coding_gene	Symbols: | Bifunctional inhibitor/lipid-transfer protein/seed storage 2S albumin superfamily protein | chr1:13528257-13529470 FORWARD LENGTH=256	NONE	NONE	NONE
Chr1:13559400-13559799	hyper	27	2	134	0.0946	0.2711	2.8668	NONE	NONE	NONE	NONE	NONE	NONE	AT1G36180-AT1G36230
Chr1:13586900-13587249	hyper	7	0	65	0.0136	0.1533	11.2932	NONE	NONE	NONE	NONE	AT1TE44495	RC/Helitron	NONE
Chr1:13604400-13604749	hyper	14	0	73	0.0801	0.2663	3.3249	NONE	NONE	NONE	NONE	NONE	NONE	AT1G36180-AT1G36230
Chr1:13638650-13638849	hyper	7	0	38	0.0266	0.2131	8.0192	NONE	NONE	NONE	NONE	AT1TE44650	SINE	NONE
Chr1:13811700-13811999	hyper	7	0	84	0.0042	0.1331	31.6792	NONE	NONE	NONE	NONE	AT1TE45275|AT1TE45280	RC/Helitron;RC/Helitron	NONE
Chr1:13816950-13817249	hyper	8	0	47	0.0052	0.1906	36.5887	AT1G36580	-	protein_coding_gene	Symbols: | BEST Arabidopsis thaliana protein match is: short-chain dehydrogenase-reductase B (TAIR:AT3G12800.1); Has 109 Blast hits to 109 proteins in 14 species: Archae - 0; Bacteria - 0; Metazoa - 0; Fungi - 0; Plants - 107; Viruses - 0; Other Eukaryotes - 2 (source: NCBI BLink). | chr1:13816459-13818106 REVERSE LENGTH=182	NONE	NONE	NONE
Chr1:13818100-13818349	hyper	10	0	93	0.086	0.1879	2.1853	AT1G36580	-	protein_coding_gene	Symbols: | BEST Arabidopsis thaliana protein match is: short-chain dehydrogenase-reductase B (TAIR:AT3G12800.1); Has 109 Blast hits to 109 proteins in 14 species: Archae - 0; Bacteria - 0; Metazoa - 0; Fungi - 0; Plants - 107; Viruses - 0; Other Eukaryotes - 2 (source: NCBI BLink). | chr1:13816459-13818106 REVERSE LENGTH=182	NONE	NONE	NONE
Chr1:13966200-13966599	hyper	27	0	127	0.0669	0.3015	4.5038	NONE	NONE	NONE	NONE	AT1TE45840|AT1TE45845	DNA/MuDR;DNA/MuDR	NONE
Chr1:14000350-14000699	hyper	14	0	78	0.04	0.2346	5.8598	NONE	NONE	NONE	NONE	NONE	NONE	AT1G36925-AT1G36940
Chr1:14011100-14011499	hyper	27	0	129	0.096	0.3256	3.3902	NONE	NONE	NONE	NONE	AT1TE46030	RC/Helitron	NONE
Chr1:14024550-14024949	hyper	33	0	101	0.036	0.3847	10.6897	NONE	NONE	NONE	NONE	NONE	NONE	AT1G36970-AT1G36980
Chr1:14030650-14030849	hyper	7	0	45	0.1579	0.3854	2.441	NONE	NONE	NONE	NONE	NONE	NONE	AT1G36990-AT1G37000
Chr1:14075900-14076149	hyper	9	0	88	0.0385	0.1681	4.3628	NONE	NONE	NONE	NONE	AT1TE46245	DNA/HAT	NONE
Chr1:14307200-14307949	hyper	24	0	193	0.0609	0.2788	4.5816	NONE	NONE	NONE	NONE	AT1TE46995	DNA/HAT	NONE
Chr1:1431000-1431249	hyper	10	0	85	0.1366	0.2986	2.1855	AT1G05010	-	protein_coding_gene	Symbols: EFE, ACO4, EAT1 | ethylene-forming enzyme | chr1:1431419-1432695 REVERSE LENGTH=323	AT1TE04675	DNA/HAT	NONE
Chr1:14744550-14744899	hyper	18	0	93	0.1256	0.3008	2.3952	NONE	NONE	NONE	NONE	NONE	NONE	AT1G38950-AT1G40083
Chr1:1476300-1476499	hyper	7	0	57	0.1302	0.322	2.4735	NONE	NONE	NONE	NONE	AT1TE04830	DNA/Mariner	NONE
Chr1:1476700-1476999	hyper	10	0	69	0.0035	0.0854	24.1046	NONE	NONE	NONE	NONE	AT1TE04830	DNA/Mariner	NONE
Chr1:148650-148999	hyper	13	0	159	0.0037	0.0831	22.4571	AT1G01390	-	protein_coding_gene	Symbols: | UDP-Glycosyltransferase superfamily protein | chr1:148319-149761 REVERSE LENGTH=480	NONE	NONE	NONE
Chr1:153950-154249	hyper	8	0	60	0.0076	0.0927	12.2205	AT1G01410	+	protein_coding_gene	Symbols: APUM22, PUM22 | pumilio 22 | chr1:153113-154198 FORWARD LENGTH=361	NONE	NONE	NONE
Chr1:1539650-1539999	hyper	11	0	113	0.007	0.0866	12.2923	AT1G05290	-	protein_coding_gene	Symbols: | CCT motif family protein | chr1:1539152-1540546 REVERSE LENGTH=369	NONE	NONE	NONE
Chr1:1543250-1543499	hyper	8	0	72	0.0026	0.3723	141.11	NONE	NONE	NONE	NONE	NONE	NONE	AT1G05291-AT1G05300
Chr1:15609850-15610049	hyper	7	0	13	0.0142	0.569	40.0172	NONE	NONE	NONE	NONE	NONE	NONE	AT1G41830-AT1G41875
Chr1:15623250-15623899	hyper	24	1	109	0.007	0.2059	29.4258	NONE	NONE	NONE	NONE	AT1TE51395	RC/Helitron	NONE
Chr1:15649950-15650149	hyper	7	0	42	0.0083	0.265	31.8684	NONE	NONE	NONE	NONE	NONE	NONE	AT1G41830-AT1G41875
Chr1:15891000-15891299	hyper	9	0	48	0.0272	0.3075	11.306	NONE	NONE	NONE	NONE	AT1TE52310	DNA/HAT	NONE
Chr1:1589250-1589549	hyper	7	0	31	0.0035	0.3468	98.1371	NONE	NONE	NONE	NONE	AT1TE05220	RC/Helitron	NONE
Chr1:15908450-15908649	hyper	7	0	59	0.0051	0.1557	30.5128	NONE	NONE	NONE	NONE	NONE	NONE	AT1G42440-AT1G42470
Chr1:1591950-1592749	hyper	47	0	233	0.0273	0.2341	8.5677	NONE	NONE	NONE	NONE	AT1TE05225	RC/Helitron	NONE
Chr1:15924550-15924799	hyper	12	0	99	0.0026	0.1069	41.54	NONE	NONE	NONE	NONE	NONE	NONE	AT1G42440-AT1G42470
Chr1:15925050-15925349	hyper	13	0	94	0.0512	0.2201	4.2982	NONE	NONE	NONE	NONE	NONE	NONE	AT1G42440-AT1G42470
Chr1:15976500-15976799	hyper	9	1	107	0.0127	0.0759	5.962	AT1G42540	+	protein_coding_gene	Symbols: ATGLR3.3, GLR3.3 | glutamate receptor 3.3 | chr1:15973489-15976703 FORWARD LENGTH=933	NONE	NONE	NONE
Chr1:1602700-1602999	hyper	9	0	127	0.0532	0.1042	1.9576	AT1G05460	-	protein_coding_gene	Symbols: SDE3 | P-loop containing nucleoside triphosphate hydrolases superfamily protein | chr1:1601357-1604658 REVERSE LENGTH=1002	NONE	NONE	NONE
Chr1:1609850-1610249	hyper	16	0	190	0.0345	0.0863	2.5025	AT1G05470	-	protein_coding_gene	Symbols: CVP2 | DNAse I-like superfamily protein | chr1:1608558-1611291 REVERSE LENGTH=617	NONE	NONE	NONE
Chr1:16117150-16117499	hyper	14	0	81	0.0822	0.2982	3.63	NONE	NONE	NONE	NONE	AT1TE53085	DNA/MuDR	NONE
Chr1:16125450-16125649	hyper	7	0	48	0.0221	0.2913	13.1588	NONE	NONE	NONE	NONE	NONE	NONE	AT1G42710-AT1G42960
Chr1:16130200-16130499	hyper	11	0	79	0.0034	0.1807	53.0228	NONE	NONE	NONE	NONE	NONE	NONE	AT1G42970-AT1G42980
Chr1:1614650-1614999	hyper	12	0	115	0.0771	0.2731	3.5412	NONE	NONE	NONE	NONE	AT1TE05280	DNA/MuDR	NONE
Chr1:16154550-16154849	hyper	7	0	75	0.037	0.1515	4.0957	NONE	NONE	NONE	NONE	NONE	NONE	AT1G43010-AT1G43020
Chr1:16231550-16231799	hyper	12	0	80	0.0947	0.2673	2.824	NONE	NONE	NONE	NONE	NONE	NONE	AT1G43130-AT1G43140
Chr1:16259700-16259899	hyper	8	0	65	0.1821	0.3647	2.0033	NONE	NONE	NONE	NONE	AT1TE53540|AT1TE53545	RC/Helitron;RC/Helitron	NONE
Chr1:16398050-16398249	hyper	7	0	50	0.0762	0.1769	2.3228	AT1G43560	-	protein_coding_gene	Symbols: Aty2, ty2 | thioredoxin Y2 | chr1:16398359-16399828 REVERSE LENGTH=167	NONE	NONE	NONE
Chr1:16410600-16410849	hyper	8	0	81	0.0253	0.1024	4.0568	AT1G43580	-	protein_coding_gene	Symbols: | Sphingomyelin synthetase family protein | chr1:16410673-16412612 REVERSE LENGTH=421	NONE	NONE	NONE
Chr1:16413400-16413799	hyper	16	0	93	0.0977	0.3194	3.2708	NONE	NONE	NONE	NONE	NONE	NONE	AT1G43580-AT1G43600
Chr1:16418150-16418399	hyper	9	0	30	0.0093	0.2755	29.7	NONE	NONE	NONE	NONE	NONE	NONE	AT1G43600-AT1G43610
Chr1:16430600-16430949	hyper	16	0	77	0.0422	0.1934	4.5871	NONE	NONE	NONE	NONE	AT1TE54160	DNA/HAT	NONE
Chr1:16437300-16437599	hyper	8	0	123	0.0095	0.0673	7.057	AT1G43630	-	protein_coding_gene	Symbols: | Protein of unknown function (DUF793) | chr1:16436445-16437686 REVERSE LENGTH=413	NONE	NONE	NONE
Chr1:16448550-16448899	hyper	13	0	86	0.005	0.2148	43.0726	NONE	NONE	NONE	NONE	NONE	NONE	AT1G43650-AT1G43665
Chr1:16463950-16464199	hyper	8	0	29	0.0009	0.1545	170.359	NONE	NONE	NONE	NONE	AT1TE54315	RC/Helitron	NONE
Chr1:16474000-16474349	hyper	16	0	99	0.1285	0.3037	2.3635	NONE	NONE	NONE	NONE	NONE	NONE	AT1G43680-AT1G43690
Chr1:16482300-16482499	hyper	8	0	99	0.0705	0.1509	2.1386	AT1G43690	+	protein_coding_gene	Symbols: | ubiquitin interaction motif-containing protein | chr1:16478519-16482589 FORWARD LENGTH=599	NONE	NONE	NONE
Chr1:16568600-16568899	hyper	12	0	100	0.1042	0.2713	2.603	NONE	NONE	NONE	NONE	NONE	NONE	AT1G43780-AT1G43790
Chr1:16577050-16577399	hyper	12	0	66	0	0.2083	20.8333	NONE	NONE	NONE	NONE	AT1TE54630	DNA/MuDR	NONE
Chr1:16581250-16581499	hyper	13	0	119	0.0227	0.0986	4.3482	NONE	NONE	NONE	NONE	NONE	NONE	AT1G43810-AT1G43850
Chr1:16640950-16641249	hyper	15	0	38	0.1346	0.3735	2.774	NONE	NONE	NONE	NONE	AT1TE54845	LTR/Copia	NONE
Chr1:16659100-16659699	hyper	49	0	125	0.0209	0.3727	17.8567	NONE	NONE	NONE	NONE	AT1TE54920|AT1TE54925	DNA/MuDR;DNA/MuDR	NONE
Chr1:16670050-16670299	hyper	9	0	23	0.0177	0.3188	17.9978	NONE	NONE	NONE	NONE	NONE	NONE	AT1G43910-AT1G43950
Chr1:16718450-16718799	hyper	19	0	118	0.111	0.2739	2.4672	AT1G44020	-	protein_coding_gene	Symbols: | Cysteine/Histidine-rich C1 domain family protein | chr1:16716692-16718656 REVERSE LENGTH=577	NONE	NONE	NONE
Chr1:16764550-16764899	hyper	7	0	126	0.0086	0.0745	8.6685	AT1G44100	-	protein_coding_gene	Symbols: AAP5 | amino acid permease 5 | chr1:16764651-16767223 REVERSE LENGTH=480	NONE	NONE	NONE
Chr1:16765400-16765599	hyper	7	0	57	0.0556	0.1456	2.6187	AT1G44100	-	protein_coding_gene	Symbols: AAP5 | amino acid permease 5 | chr1:16764651-16767223 REVERSE LENGTH=480	AT1TE55395	LINE/L1	NONE
Chr1:16766850-16767149	hyper	7	0	94	0.0232	0.1191	5.1451	AT1G44100	-	protein_coding_gene	Symbols: AAP5 | amino acid permease 5 | chr1:16764651-16767223 REVERSE LENGTH=480	NONE	NONE	NONE
Chr1:16769550-16769849	hyper	8	0	71	0.0033	0.1867	56.9386	NONE	NONE	NONE	NONE	AT1TE55415	DNA/HAT	NONE
Chr1:16795450-16795649	hyper	8	0	95	0.0419	0.1043	2.4888	AT1G44160	+	protein_coding_gene	Symbols: | HSP40/DnaJ peptide-binding protein | chr1:16795032-16796276 FORWARD LENGTH=357	NONE	NONE	NONE
Chr1:16797800-16797999	hyper	7	0	85	0.0697	0.1745	2.5036	AT1G44170	-	protein_coding_gene	Symbols: ALDH3H1, ALDH4 | aldehyde dehydrogenase 3H1 | chr1:16796564-16800031 REVERSE LENGTH=484	NONE	NONE	NONE
Chr1:16801650-16802249	hyper	32	0	180	0.0356	0.2723	7.6429	NONE	NONE	NONE	NONE	AT1TE55560|AT1TE55565	RC/Helitron;RC/Helitron	NONE
Chr1:16831000-16831349	hyper	11	0	128	0.004	0.0891	22.0329	AT1G44318	+	protein_coding_gene	Symbols: hemb2 | Aldolase superfamily protein | chr1:16831016-16833916 FORWARD LENGTH=406	NONE	NONE	NONE
Chr1:16844500-16844899	hyper	15	0	135	0.051	0.2047	4.0106	NONE	NONE	NONE	NONE	AT1TE55765	DNA/MuDR	NONE
Chr1:16852850-16853299	hyper	25	0	168	0.0571	0.251	4.3983	AT1G44478	-	protein_coding_gene	Symbols: | Cyclophilin | chr1:16852341-16853238 REVERSE LENGTH=193	AT1TE55790	LTR/Copia	NONE
Chr1:16862950-16863349	hyper	14	0	91	0.0451	0.1972	4.3755	NONE	NONE	NONE	NONE	NONE	NONE	AT1G44478-AT1G44542
Chr1:16867550-16867849	hyper	10	0	97	0.0855	0.2077	2.4286	NONE	NONE	NONE	NONE	AT1TE55855	LTR/Gypsy	NONE
Chr1:16881850-16882249	hyper	17	0	81	0.1181	0.2967	2.5112	AT1G44674	+	protein_coding_gene	Symbols: | Protein of unknown function (DUF1664) | chr1:16881891-16882133 FORWARD LENGTH=51	AT1TE55910	LINE/L1	NONE
Chr1:16882800-16883099	hyper	11	0	118	0.1198	0.2247	1.8763	NONE	NONE	NONE	NONE	AT1TE55910	LINE/L1	NONE
Chr1:16924650-16925099	hyper	36	0	115	0.0689	0.2643	3.8372	AT1G44810	+	protein_coding_gene	Symbols: | DNA-binding storekeeper protein-related transcriptional regulator | chr1:16923621-16924511 FORWARD LENGTH=296	NONE	NONE	NONE
Chr1:16925300-16925649	hyper	18	0	136	0.1047	0.2981	2.8484	NONE	NONE	NONE	NONE	NONE	NONE	AT1G44810-AT1G44820
Chr1:16936400-16936799	hyper	14	0	86	0.0122	0.2408	19.8181	NONE	NONE	NONE	NONE	AT1TE56095|AT1TE56100	RC/Helitron;RathE1_cons	NONE
Chr1:16938600-16938799	hyper	7	0	46	0.0746	0.2589	3.472	NONE	NONE	NONE	NONE	AT1TE56110	RC/Helitron	NONE
Chr1:16969050-16969349	hyper	10	0	78	0.0047	0.1401	29.9555	NONE	NONE	NONE	NONE	NONE	NONE	AT1G44890-AT1G44900
Chr1:16996900-16997199	hyper	11	0	75	0.0634	0.203	3.1995	NONE	NONE	NONE	NONE	AT1TE56290	DNA/HAT	NONE
Chr1:17015600-17015799	hyper	9	0	25	0.0465	0.4042	8.6901	NONE	NONE	NONE	NONE	NONE	NONE	AT1G45010-AT1G45015
Chr1:17092350-17092699	hyper	12	0	73	0.0387	0.2857	7.3862	NONE	NONE	NONE	NONE	NONE	NONE	AT1G45165-AT1G45170
Chr1:17100850-17101349	hyper	17	0	186	0.0358	0.1195	3.334	AT1G45180	+	protein_coding_gene	Symbols: | RING/U-box superfamily protein | chr1:17099335-17101683 FORWARD LENGTH=645	NONE	NONE	NONE
Chr1:17152800-17152999	hyper	8	0	57	0.0617	0.217	3.5145	AT1G45233	+	protein_coding_gene	Symbols: THO5, AtTHO5 | THO complex, subunit 5 | chr1:17152956-17154662 FORWARD LENGTH=452	AT1TE56835	DNA/MuDR	NONE
Chr1:17177150-17177449	hyper	9	0	59	0	0.2751	27.5064	NONE	NONE	NONE	NONE	NONE	NONE	AT1G45332-AT1G45403
Chr1:17213400-17213799	hyper	16	0	84	0.0886	0.2851	3.2178	NONE	NONE	NONE	NONE	AT1TE57040	DNA/HAT	NONE
Chr1:17228800-17229149	hyper	10	0	124	0.0822	0.1843	2.2433	NONE	NONE	NONE	NONE	NONE	NONE	AT1G46264-AT1G46336
Chr1:17250250-17251049	hyper	49	0	323	0.0199	0.1614	8.1138	NONE	NONE	NONE	NONE	AT1TE57200	LTR/Copia	NONE
Chr1:17266850-17267149	hyper	10	0	86	0.1733	0.4165	2.4029	NONE	NONE	NONE	NONE	AT1TE57235	DNA/HAT	NONE
Chr1:17268150-17268399	hyper	11	0	86	0.0228	0.1327	5.8088	NONE	NONE	NONE	NONE	AT1TE57235	DNA/HAT	NONE
Chr1:1727800-1728299	hyper	15	0	201	0.0058	0.0791	13.5657	AT1G05780	+	protein_coding_gene	Symbols: | Vacuolar ATPase assembly integral membrane protein VMA21-like domain | chr1:1726761-1728180 FORWARD LENGTH=106	NONE	NONE	NONE
Chr1:17295150-17295449	hyper	12	0	85	0.0898	0.2565	2.8561	NONE	NONE	NONE	NONE	AT1TE57315	DNA	NONE
Chr1:17357150-17357449	hyper	9	0	71	0.0011	0.1314	125.007	NONE	NONE	NONE	NONE	NONE	NONE	AT1G47340-AT1G47350
Chr1:17416000-17416349	hyper	11	0	62	0.0592	0.306	5.1721	NONE	NONE	NONE	NONE	AT1TE57710	DNA/HAT	NONE
Chr1:17418700-17418999	hyper	7	3	135	0.0316	0.0717	2.2694	AT1G47480	+	protein_coding_gene	Symbols: | alpha/beta-Hydrolases superfamily protein | chr1:17417623-17419296 FORWARD LENGTH=314	NONE	NONE	NONE
Chr1:17439950-17440199	hyper	8	0	39	0.0015	0.2251	152.18	NONE	NONE	NONE	NONE	NONE	NONE	AT1G47510-AT1G47530
Chr1:17440500-17440849	hyper	13	0	81	0.0195	0.2846	14.6216	NONE	NONE	NONE	NONE	NONE	NONE	AT1G47510-AT1G47530
Chr1:17489200-17489549	hyper	14	1	128	0.0927	0.2142	2.3099	NONE	NONE	NONE	NONE	NONE	NONE	AT1G47580-AT1G47600
Chr1:17510850-17511649	hyper	39	0	303	0.1441	0.3137	2.1769	NONE	NONE	NONE	NONE	AT1TE58030	RC/Helitron	NONE
Chr1:17536950-17537199	hyper	7	0	117	0.0133	0.0471	3.528	AT1G47670	-	protein_coding_gene	Symbols: | Transmembrane amino acid transporter family protein | chr1:17536834-17539486 REVERSE LENGTH=519	NONE	NONE	NONE
Chr1:17559400-17559949	hyper	22	2	230	0.0714	0.1731	2.4248	AT1G47710	+	protein_coding_gene	Symbols: | Serine protease inhibitor (SERPIN) family protein | chr1:17558271-17560061 FORWARD LENGTH=391	NONE	NONE	NONE
Chr1:17564250-17564549	hyper	8	0	116	0.026	0.1496	5.7427	AT1G47730	-	protein_coding_gene	Symbols: | F-box and associated interaction domains-containing protein | chr1:17563931-17565106 REVERSE LENGTH=391	NONE	NONE	NONE
Chr1:17565100-17565449	hyper	12	0	91	0.0244	0.1812	7.42	AT1G47730	-	protein_coding_gene	Symbols: | F-box and associated interaction domains-containing protein | chr1:17563931-17565106 REVERSE LENGTH=391	AT1TE58300|AT1TE58305	RC/Helitron;RC/Helitron	NONE
Chr1:17570350-17570849	hyper	23	0	177	0.0427	0.1911	4.4718	NONE	NONE	NONE	NONE	NONE	NONE	AT1G47750-AT1G47760
Chr1:17576850-17577099	hyper	7	0	27	0.0018	0.2101	118.312	NONE	NONE	NONE	NONE	AT1TE58345	RC/Helitron	NONE
Chr1:17578800-17579049	hyper	9	0	58	0.0385	0.245	6.3688	NONE	NONE	NONE	NONE	NONE	NONE	AT1G47765-AT1G47770
Chr1:17591900-17592349	hyper	15	0	173	0.0295	0.1437	4.8669	NONE	NONE	NONE	NONE	NONE	NONE	AT1G47770-AT1G47780
Chr1:17607600-17607849	hyper	8	0	40	0.131	0.3733	2.8497	NONE	NONE	NONE	NONE	AT1TE58445	DNA/MuDR	NONE
Chr1:17620550-17620849	hyper	20	0	111	0.1425	0.3347	2.3481	NONE	NONE	NONE	NONE	AT1TE58480|AT1TE58485	RC/Helitron;RC/Helitron	NONE
Chr1:17622100-17622499	hyper	16	0	70	0.0923	0.3836	4.1545	NONE	NONE	NONE	NONE	NONE	NONE	AT1G47840-AT1G47870
Chr1:17624100-17624449	hyper	18	0	95	0.0136	0.1887	13.9013	NONE	NONE	NONE	NONE	NONE	NONE	AT1G47840-AT1G47870
Chr1:17627350-17627599	hyper	7	0	74	0.0982	0.2531	2.5768	NONE	NONE	NONE	NONE	AT1TE58510	LINE/L1	NONE
Chr1:17641600-17641899	hyper	10	0	102	0.012	0.1446	12.0191	NONE	NONE	NONE	NONE	NONE	NONE	AT1G47870-AT1G47885
Chr1:17682350-17682749	hyper	16	0	133	0.0193	0.1808	9.3835	AT1G47960	-	protein_coding_gene	Symbols: C/VIF1, ATC/VIF1 | cell wall / vacuolar inhibitor of fructosidase 1 | chr1:17681954-17683516 REVERSE LENGTH=205	NONE	NONE	NONE
Chr1:17686550-17686899	hyper	15	0	67	0.0317	0.2206	6.9621	NONE	NONE	NONE	NONE	AT1TE58725|AT1TE58730	RC/Helitron;RC/Helitron	NONE
Chr1:17695650-17695899	hyper	10	0	101	0.0039	0.2085	53.1579	NONE	NONE	NONE	NONE	NONE	NONE	AT1G47980-AT1G47990
Chr1:17714750-17715049	hyper	11	0	72	0.127	0.3015	2.3736	NONE	NONE	NONE	NONE	AT1TE58825	LTR/Gypsy	NONE
Chr1:17761250-17761599	hyper	10	0	67	0.1019	0.2936	2.8805	AT1G48095	+	protein_coding_gene	Symbols: | unknown protein; BEST Arabidopsis thaliana protein match is: unknown protein (TAIR:AT1G36960.1); Has 82 Blast hits to 82 proteins in 3 species: Archae - 0; Bacteria - 0; Metazoa - 0; Fungi - 0; Plants - 82; Viruses - 0; Other Eukaryotes - 0 (source: NCBI BLink). | chr1:17760142-17761998 FORWARD LENGTH=303	NONE	NONE	NONE
Chr1:17765600-17766149	hyper	26	0	144	0.0111	0.2665	24.0736	NONE	NONE	NONE	NONE	NONE	NONE	AT1G48095-AT1G48100
Chr1:17774650-17774899	hyper	11	0	107	0.0545	0.115	2.1124	AT1G48120	-	protein_coding_gene	Symbols: | hydrolases;protein serine/threonine phosphatases | chr1:17774238-17779624 REVERSE LENGTH=1340	NONE	NONE	NONE
Chr1:17821300-17821499	hyper	8	0	39	0	0.2174	21.7391	NONE	NONE	NONE	NONE	NONE	NONE	AT1G48260-AT1G48270
Chr1:17824400-17824749	hyper	15	0	88	0.0851	0.2964	3.4815	NONE	NONE	NONE	NONE	NONE	NONE	AT1G48260-AT1G48270
Chr1:17830950-17831299	hyper	18	0	106	0.0675	0.329	4.8753	NONE	NONE	NONE	NONE	AT1TE59195	LINE?	NONE
Chr1:17841400-17841899	hyper	20	0	122	0.0171	0.2483	14.5592	NONE	NONE	NONE	NONE	NONE	NONE	AT1G48280-AT1G48300
Chr1:17842050-17842299	hyper	9	0	54	0.0096	0.2593	27.0747	NONE	NONE	NONE	NONE	NONE	NONE	AT1G48280-AT1G48300
Chr1:17856100-17856349	hyper	11	0	88	0.0987	0.2507	2.5391	NONE	NONE	NONE	NONE	NONE	NONE	AT1G48320-AT1G48325
Chr1:17979600-17979949	hyper	16	0	115	0.0673	0.2588	3.8469	NONE	NONE	NONE	NONE	NONE	NONE	AT1G48620-AT1G48630
Chr1:17997600-17997949	hyper	16	0	111	0.0112	0.1497	13.3939	AT1G48660	-	protein_coding_gene	Symbols: | Auxin-responsive GH3 family protein | chr1:17995948-17997972 REVERSE LENGTH=573	NONE	NONE	NONE
Chr1:18009600-18009999	hyper	14	0	129	0.0446	0.1631	3.6589	AT1G48690	-	protein_coding_gene	Symbols: | Auxin-responsive GH3 family protein | chr1:18009105-18009878 REVERSE LENGTH=190	NONE	NONE	NONE
Chr1:18013000-18013299	hyper	8	0	84	0.0282	0.1667	5.9167	NONE	NONE	NONE	NONE	AT1TE59755	LTR/Copia	NONE
Chr1:18029300-18029549	hyper	8	0	49	0.1573	0.4028	2.5612	NONE	NONE	NONE	NONE	AT1TE59790	RathE1_cons	NONE
Chr1:18033850-18034249	hyper	29	0	128	0.0787	0.2551	3.2422	NONE	NONE	NONE	NONE	AT1TE59800	DNA/HAT	NONE
Chr1:18048400-18048749	hyper	8	0	94	0.0032	0.1144	36.0204	NONE	NONE	NONE	NONE	NONE	NONE	AT1G48790-AT1G48800
Chr1:18049900-18050099	hyper	7	0	90	0	0.0356	3.5635	AT1G48800	+	protein_coding_gene	Symbols: | Terpenoid cyclases/Protein prenyltransferases superfamily protein | chr1:18049844-18052975 FORWARD LENGTH=603	NONE	NONE	NONE
Chr1:18126250-18126649	hyper	20	0	117	0.0524	0.2597	4.9531	NONE	NONE	NONE	NONE	NONE	NONE	AT1G49000-AT1G49005
Chr1:18132200-18132549	hyper	13	0	93	0.002	0.1305	65.5073	NONE	NONE	NONE	NONE	NONE	NONE	AT1G49005-AT1G49010
Chr1:18154250-18154549	hyper	13	0	104	0.0519	0.1745	3.3611	NONE	NONE	NONE	NONE	AT1TE60180	DNA/En-Spm	NONE
Chr1:18174600-18174949	hyper	9	0	104	0.0386	0.1327	3.4331	AT1G49130	-	protein_coding_gene	Symbols: | B-box type zinc finger protein with CCT domain | chr1:18174741-18175936 REVERSE LENGTH=326	NONE	NONE	NONE
Chr1:18212500-18212849	hyper	11	0	102	0.0133	0.1411	10.6427	NONE	NONE	NONE	NONE	NONE	NONE	AT1G49230-AT1G49240
Chr1:18224800-18224999	hyper	7	0	61	0.088	0.222	2.523	NONE	NONE	NONE	NONE	NONE	NONE	AT1G49250-AT1G49260
Chr1:18232700-18232899	hyper	7	1	27	0.0234	0.1874	7.9964	AT1G49290	-	protein_coding_gene	Symbols: | unknown protein; BEST Arabidopsis thaliana protein match is: unknown protein (TAIR:AT5G13620.1); Has 99 Blast hits to 93 proteins in 11 species: Archae - 0; Bacteria - 0; Metazoa - 2; Fungi - 0; Plants - 97; Viruses - 0; Other Eukaryotes - 0 (source: NCBI BLink). | chr1:18232608-18233624 REVERSE LENGTH=338	NONE	NONE	NONE
Chr1:18282300-18283049	hyper	31	0	143	0.0547	0.2628	4.8046	AT1G49400	+	protein_coding_gene	Symbols: emb1129 | Nucleic acid-binding, OB-fold-like protein | chr1:18283156-18283643 FORWARD LENGTH=116	NONE	NONE	NONE
Chr1:18297200-18297549	hyper	22	0	93	0.2157	0.4455	2.0653	NONE	NONE	NONE	NONE	AT1TE60630	DNA/MuDR	NONE
Chr1:18308450-18308699	hyper	8	0	71	0.0177	0.1663	9.3737	NONE	NONE	NONE	NONE	AT1TE60675	LTR/Copia	NONE
Chr1:18309550-18309949	hyper	14	0	77	0	0.3492	34.9162	NONE	NONE	NONE	NONE	NONE	NONE	AT1G49450-AT1G49470
Chr1:18421400-18421649	hyper	8	0	34	0.0041	0.262	63.6613	NONE	NONE	NONE	NONE	AT1TE61055|AT1TE61060|AT1TE61065	DNA/Pogo;RC/Helitron;RC/Helitron	NONE
Chr1:18428550-18428799	hyper	7	0	43	0	0.2865	28.6486	NONE	NONE	NONE	NONE	NONE	NONE	AT1G49770-AT1G49780
Chr1:18436300-18436499	hyper	7	0	84	0.0419	0.0909	2.1692	AT1G49790	-	protein_coding_gene	Symbols: | F-box associated ubiquitination effector family protein | chr1:18436137-18437068 REVERSE LENGTH=283	NONE	NONE	NONE
Chr1:18444500-18444799	hyper	7	0	93	0.0175	0.0648	3.6918	AT1G49820	+	protein_coding_gene	Symbols: ATMTK, MTK | S-methyl-5-thioribose kinase | chr1:18443005-18444907 FORWARD LENGTH=420	NONE	NONE	NONE
Chr1:18457450-18457999	hyper	42	0	177	0.0358	0.2977	8.3071	NONE	NONE	NONE	NONE	AT1TE61180	DNA	NONE
Chr1:18458350-18458699	hyper	11	0	71	0.0053	0.2211	41.4613	AT1G49860	+	protein_coding_gene	Symbols: ATGSTF14, GSTF14 | glutathione S-transferase (class phi) 14 | chr1:18458710-18459730 FORWARD LENGTH=254	NONE	NONE	NONE
Chr1:18482300-18482499	hyper	8	0	88	0.0378	0.0965	2.5557	AT1G49920	-	protein_coding_gene	Symbols: | MuDR family transposase | chr1:18481798-18484233 REVERSE LENGTH=785	NONE	NONE	NONE
Chr1:18511250-18511499	hyper	7	0	100	0.012	0.0773	6.4408	AT1G49980	+	protein_coding_gene	Symbols: | DNA/RNA polymerases superfamily protein | chr1:18508026-18512111 FORWARD LENGTH=671	NONE	NONE	NONE
Chr1:18541250-18541549	hyper	10	0	77	0.0862	0.3025	3.5101	NONE	NONE	NONE	NONE	NONE	NONE	AT1G50030-AT1G50040
Chr1:18547600-18547949	hyper	9	0	72	0.0046	0.0948	20.7239	AT1G50050	+	protein_coding_gene	Symbols: | CAP (Cysteine-rich secretory proteins, Antigen 5, and Pathogenesis-related 1 protein) superfamily protein | chr1:18546165-18549046 FORWARD LENGTH=226	NONE	NONE	NONE
Chr1:18550550-18550949	hyper	18	0	89	0.05	0.3359	6.7118	NONE	NONE	NONE	NONE	NONE	NONE	AT1G50050-AT1G50060
Chr1:18581300-18581999	hyper	68	0	231	0.0487	0.3037	6.2313	AT1G50160	+	protein_coding_gene	Symbols: | BEST Arabidopsis thaliana protein match is: Polynucleotidyl transferase, ribonuclease H-like superfamily protein (TAIR:AT2G04420.1); Has 34 Blast hits to 34 proteins in 2 species: Archae - 0; Bacteria - 0; Metazoa - 0; Fungi - 0; Plants - 34; Viruses - 0; Other Eukaryotes - 0 (source: NCBI BLink). | chr1:18581429-18581650 FORWARD LENGTH=73	NONE	NONE	NONE
Chr1:18598450-18598749	hyper	10	0	78	0.0051	0.1375	26.9156	AT1G50200	-	protein_coding_gene	Symbols: ALATS, ACD | Alanyl-tRNA synthetase | chr1:18591429-18598311 REVERSE LENGTH=1003	NONE	NONE	NONE
Chr1:18599150-18599449	hyper	10	0	34	0.0554	0.1387	2.5061	NONE	NONE	NONE	NONE	AT1TE61630|AT1TE61635	DNA/MuDR;RC/Helitron	NONE
Chr1:18603700-18603999	hyper	9	0	83	0.0569	0.183	3.218	AT1G50220	-	protein_coding_gene	Symbols: | unknown protein; BEST Arabidopsis thaliana protein match is: unknown protein (TAIR:AT1G43171.1); Has 31 Blast hits to 31 proteins in 2 species: Archae - 0; Bacteria - 0; Metazoa - 0; Fungi - 0; Plants - 31; Viruses - 0; Other Eukaryotes - 0 (source: NCBI BLink). | chr1:18602958-18604575 REVERSE LENGTH=203	NONE	NONE	NONE
Chr1:18640200-18640549	hyper	16	0	95	0.003	0.1689	56.7924	AT1G50325	-	protein_coding_gene	Symbols: | Plant invertase/pectin methylesterase inhibitor superfamily protein | chr1:18639886-18640479 REVERSE LENGTH=197	NONE	NONE	NONE
Chr1:18642050-18642349	hyper	14	0	100	0.0663	0.2272	3.4282	NONE	NONE	NONE	NONE	NONE	NONE	AT1G50325-AT1G50340
Chr1:18643300-18643649	hyper	12	0	72	0.0017	0.2697	155.908	NONE	NONE	NONE	NONE	NONE	NONE	AT1G50325-AT1G50340
Chr1:18644650-18645099	hyper	46	0	197	0.1015	0.2989	2.9443	NONE	NONE	NONE	NONE	NONE	NONE	AT1G50325-AT1G50340
Chr1:18647700-18648099	hyper	16	0	122	0.0063	0.2175	34.7931	AT1G50340	-	protein_coding_gene	Symbols: | Plant invertase/pectin methylesterase inhibitor superfamily protein | chr1:18647376-18647849 REVERSE LENGTH=157	AT1TE61805	RC/Helitron	NONE
Chr1:18648950-18649149	hyper	7	0	40	0.06	0.1462	2.435	AT1G50350	+	protein_coding_gene	Symbols: | BEST Arabidopsis thaliana protein match is: RING/U-box superfamily protein (TAIR:AT3G19950.1); Has 37 Blast hits to 37 proteins in 10 species: Archae - 0; Bacteria - 0; Metazoa - 0; Fungi - 0; Plants - 37; Viruses - 0; Other Eukaryotes - 0 (source: NCBI BLink). | chr1:18648756-18649227 FORWARD LENGTH=133	NONE	NONE	NONE
Chr1:18734450-18734749	hyper	9	0	46	0.0011	0.1255	115.299	NONE	NONE	NONE	NONE	NONE	NONE	AT1G50590-AT1G50600
Chr1:18747300-18747499	hyper	7	0	65	0.032	0.2153	6.7324	NONE	NONE	NONE	NONE	NONE	NONE	AT1G50610-AT1G50620
Chr1:1884100-1884399	hyper	11	0	40	0.049	0.3571	7.2826	NONE	NONE	NONE	NONE	NONE	NONE	AT1G06160-AT1G06170
Chr1:18856850-18857049	hyper	7	0	31	0.0011	0.0709	65.8532	NONE	NONE	NONE	NONE	NONE	NONE	AT1G50870-AT1G50880
Chr1:18866750-18867099	hyper	12	0	143	0.0127	0.096	7.5591	AT1G50900|AT1G50910	+|-	protein_coding_gene|protein_coding_gene	Symbols: GDC1 | Ankyrin repeat family protein | chr1:18866272-18867014 FORWARD LENGTH=175;Symbols: | unknown protein; Has 1105 Blast hits to 802 proteins in 217 species: Archae - 2; Bacteria - 177; Metazoa - 445; Fungi - 210; Plants - 58; Viruses - 6; Other Eukaryotes - 207 (source: NCBI BLink). | chr1:18867083-18869839 REVERSE LENGTH=500	NONE	NONE	NONE
Chr1:18874350-18874649	hyper	16	0	82	0.0284	0.2436	8.567	NONE	NONE	NONE	NONE	AT1TE62530	LTR/Gypsy	NONE
Chr1:18925400-18925699	hyper	8	1	97	0.0558	0.1191	2.1322	AT1G51055	-	protein_coding_gene	Symbols: | FBD-like domain family protein | chr1:18925286-18926315 REVERSE LENGTH=161	NONE	NONE	NONE
Chr1:18937100-18937399	hyper	10	0	97	0.0018	0.1075	59.9162	AT1G51110	+	protein_coding_gene	Symbols: | Plastid-lipid associated protein PAP / fibrillin family protein | chr1:18935380-18937484 FORWARD LENGTH=409	NONE	NONE	NONE
Chr1:18955900-18956199	hyper	10	0	93	0.1039	0.3033	2.9202	NONE	NONE	NONE	NONE	NONE	NONE	AT1G51170-AT1G51172
Chr1:18994600-18994799	hyper	7	0	58	0.0219	0.1679	7.6677	NONE	NONE	NONE	NONE	AT1TE62915	LTR/Copia	NONE
Chr1:19034250-19034449	hyper	7	0	63	0.0597	0.1909	3.1961	AT1G51340	+	protein_coding_gene	Symbols: | MATE efflux family protein | chr1:19032034-19034681 FORWARD LENGTH=509	NONE	NONE	NONE
Chr1:19056600-19056949	hyper	14	0	105	0.0075	0.2146	28.6749	NONE	NONE	NONE	NONE	AT1TE63150	RC/Helitron	NONE
Chr1:19071800-19071999	hyper	7	0	95	0.0252	0.0974	3.8662	AT1G51440	+	protein_coding_gene	Symbols: | alpha/beta-Hydrolases superfamily protein | chr1:19070971-19072554 FORWARD LENGTH=527	NONE	NONE	NONE
Chr1:19072700-19073149	hyper	21	0	117	0.0287	0.2942	10.2663	NONE	NONE	NONE	NONE	AT1TE63190	LTR/Copia	NONE
Chr1:19148550-19148899	hyper	12	0	71	0.098	0.325	3.3169	NONE	NONE	NONE	NONE	AT1TE63460	RC/Helitron	NONE
Chr1:19171500-19171899	hyper	14	0	76	0.1175	0.367	3.1225	NONE	NONE	NONE	NONE	AT1TE63520	DNA/MuDR	NONE
Chr1:1921550-1922049	hyper	17	0	99	0.0015	0.3349	220.037	NONE	NONE	NONE	NONE	NONE	NONE	AT1G06280-AT1G06290
Chr1:19226600-19226949	hyper	10	0	71	0.0789	0.2415	3.0607	NONE	NONE	NONE	NONE	NONE	NONE	AT1G51805-AT1G51810
Chr1:19268150-19268349	hyper	8	0	38	0.0168	0.2362	14.0348	NONE	NONE	NONE	NONE	AT1TE63870|AT1TE63875|AT1TE63880	RC/Helitron;RC/Helitron;DNA/MuDR	NONE
Chr1:19304350-19304699	hyper	13	0	93	0.0644	0.3208	4.9826	NONE	NONE	NONE	NONE	NONE	NONE	AT1G51940-AT1G51950
Chr1:19315750-19316299	hyper	29	0	163	0.006	0.1784	29.5318	NONE	NONE	NONE	NONE	AT1TE64010	RC/Helitron	NONE
Chr1:19320000-19320199	hyper	7	0	44	0.0123	0.168	13.6518	NONE	NONE	NONE	NONE	NONE	NONE	AT1G51970-AT1G51980
Chr1:19345550-19345749	hyper	7	0	41	0.2416	0.547	2.2643	NONE	NONE	NONE	NONE	AT1TE64080	DNA/MuDR	NONE
Chr1:19354400-19354599	hyper	7	0	75	0.1313	0.2651	2.0191	NONE	NONE	NONE	NONE	NONE	NONE	AT1G52040-AT1G52050
Chr1:19388400-19388649	hyper	7	0	51	0.0209	0.1262	6.0532	AT1G52110	-	protein_coding_gene	Symbols: | Mannose-binding lectin superfamily protein | chr1:19386789-19389740 REVERSE LENGTH=615	NONE	NONE	NONE
Chr1:19427850-19428349	hyper	27	0	145	0.0101	0.2035	20.1334	NONE	NONE	NONE	NONE	NONE	NONE	AT1G52180-AT1G52190
Chr1:19430500-19430849	hyper	18	0	120	0.1218	0.2944	2.4168	NONE	NONE	NONE	NONE	NONE	NONE	AT1G52180-AT1G52190
Chr1:19441250-19441649	hyper	17	0	145	0.0237	0.1919	8.0834	AT1G52191	-	protein_coding_gene	Symbols: | Thioesterase superfamily protein | chr1:19439367-19441400 REVERSE LENGTH=138	NONE	NONE	NONE
Chr1:19476700-19476949	hyper	8	0	66	0.0516	0.1738	3.368	NONE	NONE	NONE	NONE	NONE	NONE	AT1G52300-AT1G52310
Chr1:19526500-19526899	hyper	23	0	118	0.0045	0.1803	40.0852	AT1G52415	+	protein_coding_gene	Symbols: | Bifunctional inhibitor/lipid-transfer protein/seed storage 2S albumin superfamily protein | chr1:19526166-19526686 FORWARD LENGTH=116	AT1TE64630	RC/Helitron	NONE
Chr1:19533100-19533449	hyper	11	0	99	0.0181	0.1208	6.6774	AT1G52430	-	protein_coding_gene	Symbols: | Ubiquitin carboxyl-terminal hydrolase-related protein | chr1:19531350-19535955 REVERSE LENGTH=1136	NONE	NONE	NONE
Chr1:19569150-19569399	hyper	7	0	99	0.0356	0.0869	2.4381	AT1G52530	+	protein_coding_gene	Symbols: | CONTAINS InterPro DOMAIN/s: Hus1-like protein (InterPro:IPR007150); Has 129 Blast hits to 128 proteins in 49 species: Archae - 0; Bacteria - 0; Metazoa - 57; Fungi - 10; Plants - 47; Viruses - 0; Other Eukaryotes - 15 (source: NCBI BLink). | chr1:19569045-19570004 FORWARD LENGTH=319	NONE	NONE	NONE
Chr1:19570650-19570899	hyper	7	0	72	0.0186	0.0684	3.6766	AT1G52540	-	protein_coding_gene	Symbols: | Protein kinase superfamily protein | chr1:19570298-19571884 REVERSE LENGTH=350	NONE	NONE	NONE
Chr1:19636400-19636649	hyper	9	0	35	0.03	0.3065	10.2099	NONE	NONE	NONE	NONE	NONE	NONE	AT1G52700-AT1G52710
Chr1:19701900-19702249	hyper	10	0	75	0.0027	0.0864	31.5537	AT1G52900	-	protein_coding_gene	Symbols: | Toll-Interleukin-Resistance (TIR) domain family protein | chr1:19702211-19702916 REVERSE LENGTH=199	NONE	NONE	NONE
Chr1:19706700-19706949	hyper	16	0	91	0.0775	0.1796	2.3164	AT1G52905	+	protein_coding_gene	Symbols: | unknown protein; BEST Arabidopsis thaliana protein match is: unknown protein (TAIR:AT1G27565.1); Has 35333 Blast hits to 34131 proteins in 2444 species: Archae - 798; Bacteria - 22429; Metazoa - 974; Fungi - 991; Plants - 531; Viruses - 0; Other Eukaryotes - 9610 (source: NCBI BLink). | chr1:19706230-19706497 FORWARD LENGTH=47	AT1TE65120	RC/Helitron	NONE
Chr1:19713350-19713699	hyper	12	0	128	0.0877	0.2244	2.5589	NONE	NONE	NONE	NONE	NONE	NONE	AT1G52930-AT1G52940
Chr1:19731750-19731949	hyper	8	0	66	0.1541	0.387	2.512	NONE	NONE	NONE	NONE	AT1TE65205|AT1TE65220|AT1TE65225	RC/Helitron;RC/Helitron;RC/Helitron	NONE
Chr1:19743150-19743499	hyper	14	0	88	0.0042	0.1733	41.3728	AT1G52990	-	protein_coding_gene	Symbols: | thioredoxin family protein | chr1:19740503-19743449 REVERSE LENGTH=313	NONE	NONE	NONE
Chr1:19743800-19744149	hyper	13	1	81	0.1119	0.2756	2.4639	NONE	NONE	NONE	NONE	AT1TE65255	DNA/HAT	NONE
Chr1:19744350-19744549	hyper	12	0	54	0.1185	0.3536	2.9848	NONE	NONE	NONE	NONE	AT1TE65255	DNA/HAT	NONE
Chr1:19749750-19750099	hyper	11	0	92	0.0166	0.1181	7.1293	NONE	NONE	NONE	NONE	AT1TE65280	RC/Helitron	NONE
Chr1:19767800-19767999	hyper	7	0	33	0.106	0.3793	3.5797	NONE	NONE	NONE	NONE	AT1TE65355|AT1TE65360	RC/Helitron;RC/Helitron	NONE
Chr1:19798300-19798549	hyper	7	0	73	0.0136	0.1612	11.8234	NONE	NONE	NONE	NONE	NONE	NONE	AT1G53130-AT1G53140
Chr1:19807900-19808099	hyper	7	0	57	0.0767	0.2046	2.6676	NONE	NONE	NONE	NONE	NONE	NONE	AT1G53160-AT1G53163
Chr1:19810000-19810349	hyper	20	0	78	0.0592	0.3872	6.5421	NONE	NONE	NONE	NONE	AT1TE65500	DNA/MuDR	NONE
Chr1:19861150-19861899	hyper	46	0	195	0.039	0.2623	6.7227	AT1G53265	-	protein_coding_gene	Symbols: | unknown protein; Has 4 Blast hits to 4 proteins in 1 species: Archae - 0; Bacteria - 0; Metazoa - 0; Fungi - 0; Plants - 4; Viruses - 0; Other Eukaryotes - 0 (source: NCBI BLink). | chr1:19861098-19861475 REVERSE LENGTH=125	NONE	NONE	NONE
Chr1:19913850-19914149	hyper	7	0	130	0.0176	0.0728	4.1428	AT1G53380	-	protein_coding_gene	Symbols: | Plant protein of unknown function (DUF641) | chr1:19913341-19914702 REVERSE LENGTH=453	NONE	NONE	NONE
Chr1:20000350-20000649	hyper	8	0	87	0.0013	0.0672	50.1984	NONE	NONE	NONE	NONE	NONE	NONE	AT1G53590-AT1G53600
Chr1:20014500-20014849	hyper	13	0	39	0.0046	0.238	51.2746	AT1G53625	-	protein_coding_gene	Symbols: | unknown protein; Has 29996 Blast hits to 6987 proteins in 655 species: Archae - 23; Bacteria - 6686; Metazoa - 10521; Fungi - 1178; Plants - 7439; Viruses - 681; Other Eukaryotes - 3468 (source: NCBI BLink). | chr1:20014545-20014814 REVERSE LENGTH=89	AT1TE66155	RC/Helitron	NONE
Chr1:20032250-20032449	hyper	7	0	43	0	0.2387	23.8683	NONE	NONE	NONE	NONE	NONE	NONE	AT1G53650-AT1G53660
Chr1:20084850-20085149	hyper	16	0	111	0.0694	0.2429	3.4996	NONE	NONE	NONE	NONE	NONE	NONE	AT1G53800-AT1G53815
Chr1:20090250-20090649	hyper	14	0	159	0.0462	0.1451	3.1442	AT1G53815	-	protein_coding_gene	Symbols: | F-box family protein | chr1:20090249-20090962 REVERSE LENGTH=237	AT1TE66390	LTR/Copia	NONE
Chr1:20156700-20157049	hyper	11	0	114	0.0032	0.1928	59.6357	NONE	NONE	NONE	NONE	AT1TE66580|AT1TE66585	DNA/Pogo;RC/Helitron	NONE
Chr1:20171400-20171899	hyper	25	1	169	0.0109	0.1164	10.6651	AT1G54040	-	protein_coding_gene	Symbols: ESP, TASTY, ESR | epithiospecifier protein | chr1:20170995-20171780 REVERSE LENGTH=261	NONE	NONE	NONE
Chr1:20177800-20178149	hyper	14	0	88	0.0035	0.2443	69.0175	NONE	NONE	NONE	NONE	AT1TE66680	RC/Helitron	NONE
Chr1:20191400-20191649	hyper	8	0	105	0.0514	0.1046	2.0357	AT1G54090	+	protein_coding_gene	Symbols: ATEXO70D2, EXO70D2 | exocyst subunit exo70 family protein D2 | chr1:20189737-20191605 FORWARD LENGTH=622	NONE	NONE	NONE
Chr1:20272650-20272849	hyper	9	0	51	0.1796	0.4006	2.23	NONE	NONE	NONE	NONE	NONE	NONE	AT1G54300-AT1G54310
Chr1:2028250-2028599	hyper	7	0	137	0.0031	0.0528	16.804	AT1G06630	+	protein_coding_gene	Symbols: | F-box/RNI-like superfamily protein | chr1:2028071-2031173 FORWARD LENGTH=477	NONE	NONE	NONE
Chr1:20334650-20335149	hyper	31	0	159	0.0416	0.2486	5.979	NONE	NONE	NONE	NONE	AT1TE67200	LTR/Gypsy	NONE
Chr1:20370400-20370599	hyper	7	1	78	0.0637	0.1328	2.0839	AT1G54550	+	protein_coding_gene	Symbols: | F-box and associated interaction domains-containing protein | chr1:20369689-20370777 FORWARD LENGTH=362	NONE	NONE	NONE
Chr1:20422700-20423049	hyper	13	1	125	0.1015	0.2155	2.1228	AT1G54720	+	protein_coding_gene	Symbols: | early-responsive to dehydration protein-related / ERD protein-related | chr1:20422831-20423754 FORWARD LENGTH=121	AT1TE67445	LTR/Gypsy	NONE
Chr1:20423800-20424149	hyper	13	0	83	0.1271	0.3888	3.0592	NONE	NONE	NONE	NONE	NONE	NONE	AT1G54720-AT1G54730
Chr1:20434050-20434499	hyper	32	0	174	0.1217	0.2995	2.4611	AT1G54760	+	protein_coding_gene	Symbols: AGL85 | AGAMOUS-like 85 | chr1:20433912-20434397 FORWARD LENGTH=161	NONE	NONE	NONE
Chr1:20461200-20461549	hyper	9	0	64	0.0437	0.1627	3.7186	AT1G54880	-	protein_coding_gene	Symbols: | unknown protein; Has 2 Blast hits to 2 proteins in 1 species: Archae - 0; Bacteria - 0; Metazoa - 0; Fungi - 0; Plants - 2; Viruses - 0; Other Eukaryotes - 0 (source: NCBI BLink). | chr1:20461038-20461558 REVERSE LENGTH=63	NONE	NONE	NONE
Chr1:20470400-20470949	hyper	28	0	163	0.0311	0.2226	7.1521	AT1G54920	+	protein_coding_gene	Symbols: | unknown protein; FUNCTIONS IN: molecular_function unknown; INVOLVED IN: biological_process unknown; LOCATED IN: membrane; EXPRESSED IN: 23 plant structures; EXPRESSED DURING: 15 growth stages; Has 30201 Blast hits to 17322 proteins in 780 species: Archae - 12; Bacteria - 1396; Metazoa - 17338; Fungi - 3422; Plants - 5037; Viruses - 0; Other Eukaryotes - 2996 (source: NCBI BLink). | chr…	NONE	NONE	NONE
Chr1:20475300-20475549	hyper	14	0	93	0.0572	0.2145	3.7492	NONE	NONE	NONE	NONE	NONE	NONE	AT1G54920-AT1G54930
Chr1:20481700-20481999	hyper	7	0	94	0.007	0.0879	12.5672	AT1G54940	+	protein_coding_gene	Symbols: PGSIP4 | plant glycogenin-like starch initiation protein 4 | chr1:20481690-20484541 FORWARD LENGTH=557	NONE	NONE	NONE
Chr1:20671800-20672199	hyper	20	0	106	0.0991	0.3745	3.7795	NONE	NONE	NONE	NONE	AT1TE68270	DNA/HAT	NONE
Chr1:20705700-20705899	hyper	7	0	59	0.0104	0.1173	11.2276	AT1G55450	-	protein_coding_gene	Symbols: | S-adenosyl-L-methionine-dependent methyltransferases superfamily protein | chr1:20705274-20706825 REVERSE LENGTH=311	NONE	NONE	NONE
Chr1:20757200-20757399	hyper	7	0	53	0.0096	0.1837	19.0408	NONE	NONE	NONE	NONE	NONE	NONE	AT1G55560-AT1G55570
Chr1:20781400-20781999	hyper	16	0	274	0.0016	0.0387	24.1427	AT1G55610	-	protein_coding_gene	Symbols: BRL1 | BRI1 like | chr1:20779874-20783374 REVERSE LENGTH=1166	NONE	NONE	NONE
Chr1:20799100-20799299	hyper	8	0	39	0	0.4106	41.0569	NONE	NONE	NONE	NONE	NONE	NONE	AT1G55650-AT1G55660
Chr1:20816150-20816449	hyper	11	0	54	0.0016	0.2801	177.861	NONE	NONE	NONE	NONE	NONE	NONE	AT1G55690-AT1G55700
Chr1:20840350-20840949	hyper	19	0	206	0.0258	0.1188	4.6055	AT1G55750	-	protein_coding_gene	Symbols: | BSD domain (BTF2-like transcription factors, Synapse-associated proteins and DOS2-like proteins) | chr1:20840449-20845135 REVERSE LENGTH=591	NONE	NONE	NONE
Chr1:20913750-20913999	hyper	7	0	42	0.0221	0.1992	9.0075	NONE	NONE	NONE	NONE	NONE	NONE	AT1G55920-AT1G55928
Chr1:20926350-20926649	hyper	12	0	74	0.106	0.2237	2.11	NONE	NONE	NONE	NONE	NONE	NONE	AT1G55940-AT1G55950
Chr1:20947450-20947799	hyper	11	0	113	0.045	0.1537	3.4166	AT1G56010	-	protein_coding_gene	Symbols: NAC1, anac021 | NAC domain containing protein 1 | chr1:20946852-20947727 REVERSE LENGTH=257	NONE	NONE	NONE
Chr1:21017300-21017599	hyper	8	0	122	0.0277	0.0675	2.4371	AT1G56150	+	protein_coding_gene	Symbols: | SAUR-like auxin-responsive protein family | chr1:21017432-21017764 FORWARD LENGTH=110	NONE	NONE	NONE
Chr1:210300-210599	hyper	10	0	128	0.0023	0.0605	26.2258	AT1G01580	+	protein_coding_gene	Symbols: FRO2, FRD1, ATFRO2 | ferric reduction oxidase 2 | chr1:209395-212810 FORWARD LENGTH=725	NONE	NONE	NONE
Chr1:21034700-21034899	hyper	7	0	41	0.1573	0.3298	2.0966	NONE	NONE	NONE	NONE	NONE	NONE	AT1G56200-AT1G56210
Chr1:21041950-21042149	hyper	7	0	27	0	0.2629	26.2857	NONE	NONE	NONE	NONE	AT1TE69485	RC/Helitron	NONE
Chr1:21050600-21050949	hyper	9	0	82	0	0.2213	22.1269	AT1G56233	-	protein_coding_gene	Symbols: | Protein of unknown function (PD694200) | chr1:21050611-21051017 REVERSE LENGTH=87	NONE	NONE	NONE
Chr1:21058750-21059199	hyper	23	0	107	0.003	0.2185	72.8802	NONE	NONE	NONE	NONE	NONE	NONE	AT1G56240-AT1G56250
Chr1:21071100-21071549	hyper	20	0	203	0.0397	0.1194	3.0073	AT1G56270	-	protein_coding_gene	Symbols: | unknown protein; Has 38 Blast hits to 38 proteins in 3 species: Archae - 0; Bacteria - 0; Metazoa - 0; Fungi - 0; Plants - 38; Viruses - 0; Other Eukaryotes - 0 (source: NCBI BLink). | chr1:21071148-21071636 REVERSE LENGTH=162	NONE	NONE	NONE
Chr1:21113150-21113349	hyper	11	2	88	0.0698	0.1522	2.1801	AT1G56400	-	protein_coding_gene	Symbols: | F-box family protein | chr1:21111805-21113621 REVERSE LENGTH=479	NONE	NONE	NONE
Chr1:21158550-21159349	hyper	45	0	214	0.0052	0.2494	47.7152	NONE	NONE	NONE	NONE	NONE	NONE	AT1G56460-AT1G56500
Chr1:21229000-21229199	hyper	8	0	51	0.1355	0.2916	2.1512	NONE	NONE	NONE	NONE	AT1TE70150	RathE1_cons	NONE
Chr1:21243050-21243349	hyper	9	0	91	0.0066	0.0797	12.1392	AT1G56670	+	protein_coding_gene	Symbols: | GDSL-like Lipase/Acylhydrolase superfamily protein | chr1:21241688-21243965 FORWARD LENGTH=373	NONE	NONE	NONE
Chr1:21244100-21244399	hyper	14	0	91	0.136	0.3169	2.3311	NONE	NONE	NONE	NONE	AT1TE70185|AT1TE70190	LTR/Copia;LTR/Copia	NONE
Chr1:21250200-21250599	hyper	14	0	103	0.0084	0.1109	13.2318	AT1G56680	-	protein_coding_gene	Symbols: | Chitinase family protein | chr1:21250428-21251417 REVERSE LENGTH=280	NONE	NONE	NONE
Chr1:2127700-2128049	hyper	8	0	115	0.0065	0.0581	8.9729	AT1G06923|AT1G06925	+|-	protein_coding_gene|protein_coding_gene	Symbols: | BEST Arabidopsis thaliana protein match is: ovate family protein 17 (TAIR:AT2G30395.1); Has 35333 Blast hits to 34131 proteins in 2444 species: Archae - 798; Bacteria - 22429; Metazoa - 974; Fungi - 991; Plants - 531; Viruses - 0; Other Eukaryotes - 9610 (source: NCBI BLink). | chr1:2126802-2127398 FORWARD LENGTH=170;Symbols: | FUNCTIONS IN: molecular_function unknown; INVOLVED IN: bio…	NONE	NONE	NONE
Chr1:21334900-21335149	hyper	8	0	42	0.0136	0.233	17.1516	NONE	NONE	NONE	NONE	NONE	NONE	AT1G57600-AT1G57610
Chr1:21341050-21341249	hyper	10	0	81	0.1471	0.3024	2.0557	NONE	NONE	NONE	NONE	NONE	NONE	AT1G57613-AT1G57620
Chr1:21342100-21342299	hyper	9	0	45	0.1827	0.4026	2.2041	NONE	NONE	NONE	NONE	AT1TE70480	DNA/MuDR	NONE
Chr1:21345950-21346249	hyper	10	0	110	0.0617	0.1298	2.1034	AT1G57630	+	protein_coding_gene	Symbols: | Toll-Interleukin-Resistance (TIR) domain family protein | chr1:21345639-21346157 FORWARD LENGTH=172	AT1TE70490	LTR/Copia	NONE
Chr1:213550-213799	hyper	8	0	52	0.2409	0.5181	2.1508	NONE	NONE	NONE	NONE	AT1TE00680	DNA/MuDR	NONE
Chr1:21360750-21361099	hyper	7	0	70	0.0356	0.1373	3.8535	NONE	NONE	NONE	NONE	NONE	NONE	AT1G57670-AT1G57680
Chr1:21369300-21369649	hyper	17	0	101	0.1077	0.29	2.6937	NONE	NONE	NONE	NONE	AT1TE70545	RC/Helitron	NONE
Chr1:21392900-21393199	hyper	8	0	76	0.1433	0.319	2.2257	NONE	NONE	NONE	NONE	AT1TE70630	DNA/MuDR	NONE
Chr1:21396550-21396899	hyper	11	0	105	0.0014	0.0882	61.2353	AT1G57770	+	protein_coding_gene	Symbols: | FAD/NAD(P)-binding oxidoreductase family protein | chr1:21395254-21398135 FORWARD LENGTH=574	NONE	NONE	NONE
Chr1:21426550-21426849	hyper	8	0	96	0.0108	0.0799	7.4223	AT1G57850	+	protein_coding_gene	Symbols: | Toll-Interleukin-Resistance (TIR) domain family protein | chr1:21426690-21427349 FORWARD LENGTH=158	NONE	NONE	NONE
Chr1:21429350-21429699	hyper	14	0	99	0.0705	0.2003	2.8408	NONE	NONE	NONE	NONE	NONE	NONE	AT1G57850-AT1G57860
Chr1:21444250-21444749	hyper	26	0	126	0.0207	0.284	13.7015	NONE	NONE	NONE	NONE	AT1TE70780	RC/Helitron	NONE
Chr1:21462500-21462799	hyper	12	0	95	0.0686	0.2128	3.1032	NONE	NONE	NONE	NONE	NONE	NONE	AT1G58025-AT1G58030
Chr1:21512600-21512999	hyper	16	0	154	0.0161	0.0927	5.7636	AT1G58100	-	protein_coding_gene	Symbols: | TCP family transcription factor | chr1:21512680-21513885 REVERSE LENGTH=401	NONE	NONE	NONE
Chr1:21524600-21525049	hyper	18	0	58	0.0754	0.3355	4.4522	NONE	NONE	NONE	NONE	AT1TE71035|AT1TE71045	RC/Helitron;LTR/Copia	NONE
Chr1:21531000-21531349	hyper	8	0	146	0.0048	0.0657	13.6681	NONE	NONE	NONE	NONE	NONE	NONE	AT1G58150-AT1G58160
Chr1:2156300-2156699	hyper	20	0	157	0.0217	0.1432	6.5976	NONE	NONE	NONE	NONE	NONE	NONE	AT1G07020-AT1G07025
Chr1:2158000-2158349	hyper	21	0	150	0.0784	0.2048	2.6124	AT1G07025	-	protein_coding_gene	Symbols: | Mitochondrial substrate carrier family protein | chr1:2157658-2158158 REVERSE LENGTH=166	NONE	NONE	NONE
Chr1:21585150-21585649	hyper	28	0	170	0.0201	0.1855	9.2266	NONE	NONE	NONE	NONE	NONE	NONE	AT1G58245-AT1G58248
Chr1:21606850-21607299	hyper	17	0	148	0.0547	0.181	3.3062	AT1G58260	+	protein_coding_gene	Symbols: CYP79C2, CYP79C3P | cytochrome p450 79c2 | chr1:21605752-21607995 FORWARD LENGTH=530	NONE	NONE	NONE
Chr1:21611300-21612099	hyper	37	0	192	0.0103	0.2402	23.4322	AT1G58265	+	protein_coding_gene	Symbols: | Cytochrome P450 superfamily protein | chr1:21610909-21611388 FORWARD LENGTH=159	NONE	NONE	NONE
Chr1:21615100-21615349	hyper	7	0	25	0.1147	0.4525	3.9452	NONE	NONE	NONE	NONE	AT1TE71325|AT1TE71330	RC/Helitron;RC/Helitron	NONE
Chr1:21616150-21616399	hyper	11	0	69	0.0757	0.2497	3.2987	NONE	NONE	NONE	NONE	AT1TE71330|AT1TE71335	RC/Helitron;RC/Helitron	NONE
Chr1:21617350-21617549	hyper	7	0	39	0.1111	0.3898	3.5079	NONE	NONE	NONE	NONE	NONE	NONE	AT1G58270-AT1G58280
Chr1:21662400-21662649	hyper	7	0	31	0.0404	0.1803	4.4661	NONE	NONE	NONE	NONE	AT1TE71490	RC/Helitron	NONE
Chr1:21663050-21663349	hyper	9	0	103	0.0523	0.1217	2.3251	AT1G58350	-	protein_coding_gene	Symbols: ZW18 | Putative serine esterase family protein | chr1:21663131-21666827 REVERSE LENGTH=794	NONE	NONE	NONE
Chr1:21674950-21675349	hyper	15	0	112	0.0978	0.2709	2.7699	NONE	NONE	NONE	NONE	NONE	NONE	AT1G58350-AT1G58360
Chr1:21681250-21681649	hyper	20	0	108	0.1091	0.4024	3.6897	NONE	NONE	NONE	NONE	AT1TE71540	RC/Helitron	NONE
Chr1:21682500-21683199	hyper	29	0	190	0.0493	0.2462	4.991	NONE	NONE	NONE	NONE	NONE	NONE	AT1G58360-AT1G58370
Chr1:21710150-21710899	hyper	28	0	162	0.0367	0.2371	6.4625	NONE	NONE	NONE	NONE	AT1TE71640|AT1TE71645	DNA;DNA	NONE
Chr1:21741850-21742349	hyper	16	0	99	0.0731	0.2446	3.3439	NONE	NONE	NONE	NONE	AT1TE71745	DNA/MuDR	NONE
Chr1:21824100-21824449	hyper	15	0	102	0.0448	0.1671	3.7321	NONE	NONE	NONE	NONE	AT1TE72030	DNA/HAT	NONE
Chr1:21892100-21892549	hyper	25	0	144	0.0038	0.298	78.629	NONE	NONE	NONE	NONE	NONE	NONE	AT1G59600-AT1G59610
Chr1:21932900-21933249	hyper	16	0	122	0.0017	0.1149	68.2872	AT1G59680	+	protein_coding_gene	Symbols: EDA1 | F-box associated ubiquitination effector family protein | chr1:21933021-21934216 FORWARD LENGTH=264	AT1TE72375	RC/Helitron	NONE
Chr1:21938200-21938499	hyper	8	0	65	0.0056	0.2912	52.4118	AT1G59710	+	protein_coding_gene	Symbols: | Protein of unknown function (DUF569) | chr1:21938623-21939673 FORWARD LENGTH=300	NONE	NONE	NONE
Chr1:21947200-21947549	hyper	23	0	140	0.0877	0.3239	3.6923	NONE	NONE	NONE	NONE	AT1TE72450	RathE3_cons	NONE
Chr1:21951600-21952049	hyper	21	0	145	0.0259	0.1522	5.8668	AT1G59725	+	protein_coding_gene	Symbols: | DNAJ heat shock family protein | chr1:21950738-21952210 FORWARD LENGTH=331	NONE	NONE	NONE
Chr1:21958000-21958299	hyper	9	0	87	0.01	0.1326	13.3039	NONE	NONE	NONE	NONE	NONE	NONE	AT1G59730-AT1G59740
Chr1:21999700-21999999	hyper	9	0	57	0.0011	0.1638	145.448	NONE	NONE	NONE	NONE	NONE	NONE	AT1G59780-AT1G59790
Chr1:22025150-22025599	hyper	22	0	127	0.0614	0.2101	3.4227	AT1G59835	-	protein_coding_gene	Symbols: | unknown protein; BEST Arabidopsis thaliana protein match is: unknown protein (TAIR:AT3G50610.1); Has 55 Blast hits to 24 proteins in 6 species: Archae - 0; Bacteria - 0; Metazoa - 0; Fungi - 0; Plants - 55; Viruses - 0; Other Eukaryotes - 0 (source: NCBI BLink). | chr1:22025041-22025421 REVERSE LENGTH=126	AT1TE72730	RC/Helitron	NONE
Chr1:22074900-22075099	hyper	7	0	46	0	0.2189	21.8919	NONE	NONE	NONE	NONE	NONE	NONE	AT1G59970-AT1G59980
Chr1:22085350-22085549	hyper	7	0	54	0.1429	0.3861	2.7024	NONE	NONE	NONE	NONE	NONE	NONE	AT1G59980-AT1G59990
Chr1:22111750-22112049	hyper	8	0	70	0.0228	0.1829	8.0202	NONE	NONE	NONE	NONE	AT1TE73005|AT1TE73010	RC/Helitron;DNA/MuDR	NONE
Chr1:22117350-22117699	hyper	15	0	97	0.0232	0.2413	10.4208	NONE	NONE	NONE	NONE	NONE	NONE	AT1G60030-AT1G60040
Chr1:22126050-22126299	hyper	7	0	40	0.1327	0.2675	2.0165	NONE	NONE	NONE	NONE	AT1TE73065	DNA/HAT	NONE
Chr1:2217100-2217399	hyper	11	0	112	0.0058	0.0638	10.9102	AT1G07220	-	protein_coding_gene	Symbols: | Arabidopsis thaliana protein of unknown function (DUF821) | chr1:2217073-2219379 REVERSE LENGTH=507	NONE	NONE	NONE
Chr1:22240650-22241049	hyper	15	0	72	0.005	0.1978	39.511	NONE	NONE	NONE	NONE	NONE	NONE	AT1G60340-AT1G60350
Chr1:22243200-22243449	hyper	8	0	110	0.0619	0.1258	2.0338	AT1G60360	-	protein_coding_gene	Symbols: | RING/U-box superfamily protein | chr1:22242748-22243731 REVERSE LENGTH=327	NONE	NONE	NONE
Chr1:22322000-22322599	hyper	29	0	158	0.0017	0.2406	143.895	NONE	NONE	NONE	NONE	AT1TE73690	DNA/MuDR	NONE
Chr1:22330400-22330849	hyper	28	0	100	0.0051	0.3134	61.106	NONE	NONE	NONE	NONE	NONE	NONE	AT1G60610-AT1G60620
Chr1:2235050-2235399	hyper	8	0	84	0.0732	0.1774	2.4229	NONE	NONE	NONE	NONE	AT1TE07300|AT1TE07305	RC/Helitron;RC/Helitron	NONE
Chr1:22375700-22376049	hyper	11	0	91	0.0044	0.1263	28.7243	AT1G60783	+	protein_coding_gene	Symbols: | unknown protein; FUNCTIONS IN: molecular_function unknown; INVOLVED IN: biological_process unknown; LOCATED IN: cellular_component unknown; BEST Arabidopsis thaliana protein match is: unknown protein (TAIR:AT1G10690.1); Has 30201 Blast hits to 17322 proteins in 780 species: Archae - 12; Bacteria - 1396; Metazoa - 17338; Fungi - 3422; Plants - 5037; Viruses - 0; Other Eukaryotes - 2996 …	NONE	NONE	NONE
Chr1:22418750-22419099	hyper	9	0	91	0.0267	0.2884	10.8029	NONE	NONE	NONE	NONE	AT1TE73995	RC/Helitron	NONE
Chr1:22443000-22443399	hyper	16	0	99	0.0072	0.2386	33.068	NONE	NONE	NONE	NONE	NONE	NONE	AT1G60940-AT1G60950
Chr1:22443750-22444049	hyper	7	0	70	0.0927	0.3584	3.8675	NONE	NONE	NONE	NONE	NONE	NONE	AT1G60940-AT1G60950
Chr1:22445500-22445799	hyper	7	0	141	0.012	0.0398	3.3053	AT1G60960	-	protein_coding_gene	Symbols: IRT3, ATIRT3 | iron regulated transporter 3 | chr1:22445410-22447060 REVERSE LENGTH=425	NONE	NONE	NONE
Chr1:22459750-22459949	hyper	8	0	60	0.0134	0.2084	15.6005	NONE	NONE	NONE	NONE	NONE	NONE	AT1G60986-AT1G60987
Chr1:22494100-22494399	hyper	8	0	144	0.005	0.0509	10.1745	AT1G61080	-	protein_coding_gene	Symbols: | Hydroxyproline-rich glycoprotein family protein | chr1:22493194-22497019 REVERSE LENGTH=907	NONE	NONE	NONE
Chr1:22541350-22542149	hyper	61	0	230	0.0187	0.2953	15.7882	NONE	NONE	NONE	NONE	AT1TE74360	RathE1_cons	NONE
Chr1:22590100-22590449	hyper	12	0	72	0.0063	0.2675	42.6597	NONE	NONE	NONE	NONE	NONE	NONE	AT1G61255-AT1G61260
Chr1:22601550-22601749	hyper	7	0	47	0.0069	0.0512	7.4319	AT1G61270	-	protein_coding_gene	Symbols: | Transmembrane amino acid transporter family protein | chr1:22599665-22602140 REVERSE LENGTH=451	NONE	NONE	NONE
Chr1:22618000-22618349	hyper	12	0	126	0.0422	0.1507	3.5718	AT1G61320	+	protein_coding_gene	Symbols: | FBD / Leucine Rich Repeat domains containing protein | chr1:22617370-22619718 FORWARD LENGTH=459	NONE	NONE	NONE
Chr1:22642200-22642899	hyper	20	0	290	0.042	0.1014	2.4119	AT1G61370	-	protein_coding_gene	Symbols: | S-locus lectin protein kinase family protein | chr1:22642096-22645147 REVERSE LENGTH=814	NONE	NONE	NONE
Chr1:22689650-22689949	hyper	7	0	124	0.021	0.091	4.3405	AT1G61500	-	protein_coding_gene	Symbols: | S-locus lectin protein kinase family protein | chr1:22689729-22692881 REVERSE LENGTH=804	NONE	NONE	NONE
Chr1:22731850-22732099	hyper	8	0	50	0.0358	0.3279	9.1472	NONE	NONE	NONE	NONE	NONE	NONE	AT1G61600-AT1G61610
Chr1:22745500-22745699	hyper	7	0	76	0.0444	0.1466	3.3037	AT1G61630	+	protein_coding_gene	Symbols: ATENT7, ENT7 | equilibrative nucleoside transporter 7 | chr1:22744207-22746111 FORWARD LENGTH=417	NONE	NONE	NONE
Chr1:22748350-22748699	hyper	13	0	151	0.0562	0.1196	2.1277	AT1G61640	-	protein_coding_gene	Symbols: | Protein kinase superfamily protein | chr1:22746629-22749053 REVERSE LENGTH=621	NONE	NONE	NONE
Chr1:22763950-22764299	hyper	15	0	111	0.0065	0.2054	31.6639	NONE	NONE	NONE	NONE	NONE	NONE	AT1G61660-AT1G61667
Chr1:22774050-22774349	hyper	7	0	99	0.0037	0.063	16.8441	AT1G61680	-	protein_coding_gene	Symbols: TPS14, ATTPS14 | terpene synthase 14 | chr1:22772455-22774687 REVERSE LENGTH=569	NONE	NONE	NONE
Chr1:22775650-22775849	hyper	7	0	50	0.0408	0.1623	3.9729	NONE	NONE	NONE	NONE	NONE	NONE	AT1G61680-AT1G61688
Chr1:22873750-22873949	hyper	7	0	68	0.0248	0.2395	9.6431	NONE	NONE	NONE	NONE	AT1TE75405	DNA/MuDR	NONE
Chr1:22925350-22925699	hyper	11	0	122	0.0082	0.0784	9.5804	AT1G62030	-	protein_coding_gene	Symbols: | Cysteine/Histidine-rich C1 domain family protein | chr1:22924309-22926540 REVERSE LENGTH=743	NONE	NONE	NONE
Chr1:22929950-22930349	hyper	19	0	75	0.0293	0.2649	9.0354	NONE	NONE	NONE	NONE	NONE	NONE	AT1G62030-AT1G62040
Chr1:22981000-22981349	hyper	10	0	148	0.004	0.0583	14.415	AT1G62190	+	protein_coding_gene	Symbols: | Kua-ubiquitin conjugating enzyme hybrid localisation domain | chr1:22980976-22981863 FORWARD LENGTH=295	NONE	NONE	NONE
Chr1:22984850-22985249	hyper	20	0	101	0.0193	0.2289	11.8551	NONE	NONE	NONE	NONE	NONE	NONE	AT1G62200-AT1G62210
Chr1:22985700-22985999	hyper	8	0	81	0.1096	0.2318	2.1146	NONE	NONE	NONE	NONE	NONE	NONE	AT1G62200-AT1G62210
Chr1:23004400-23005049	hyper	31	0	228	0.0257	0.1596	6.2054	AT1G62270	+	protein_coding_gene	Symbols: | F-box and associated interaction domains-containing protein | chr1:23004499-23005650 FORWARD LENGTH=383	NONE	NONE	NONE
Chr1:23017250-23017599	hyper	12	0	134	0.0037	0.1091	29.212	AT1G62300	-	protein_coding_gene	Symbols: WRKY6, ATWRKY6 | WRKY family transcription factor | chr1:23016887-23019155 REVERSE LENGTH=553	NONE	NONE	NONE
Chr1:23026250-23026599	hyper	7	0	129	0.0346	0.0901	2.6031	NONE	NONE	NONE	NONE	NONE	NONE	AT1G62301-AT1G62305
Chr1:23029650-23030149	hyper	23	0	89	0	0.4353	43.5252	NONE	NONE	NONE	NONE	NONE	NONE	AT1G62305-AT1G62310
Chr1:23042500-23042849	hyper	18	0	123	0.0551	0.1759	3.1955	AT1G62320	-	protein_coding_gene	Symbols: | ERD (early-responsive to dehydration stress) family protein | chr1:23041668-23044855 REVERSE LENGTH=769	NONE	NONE	NONE
Chr1:23043250-23043449	hyper	7	0	73	0.1341	0.2543	1.8961	AT1G62320	-	protein_coding_gene	Symbols: | ERD (early-responsive to dehydration stress) family protein | chr1:23041668-23044855 REVERSE LENGTH=769	NONE	NONE	NONE
Chr1:23049700-23050049	hyper	11	0	139	0.0248	0.118	4.7637	AT1G62330	+	protein_coding_gene	Symbols: | O-fucosyltransferase family protein | chr1:23046965-23050053 FORWARD LENGTH=652	NONE	NONE	NONE
Chr1:23052000-23052349	hyper	8	0	140	0.0682	0.1435	2.1058	AT1G62340	-	protein_coding_gene	Symbols: ALE1, ALE | PA-domain containing subtilase family protein | chr1:23051123-23055656 REVERSE LENGTH=832	NONE	NONE	NONE
Chr1:23067850-23068199	hyper	15	1	102	0.0834	0.2775	3.3284	NONE	NONE	NONE	NONE	NONE	NONE	AT1G62360-AT1G62370
Chr1:23088000-23088349	hyper	18	0	73	0.0077	0.2154	27.8897	NONE	NONE	NONE	NONE	AT1TE76100	LINE/L1	NONE
Chr1:23091100-23091299	hyper	7	0	88	0.0454	0.1077	2.3716	AT1G62400	+	protein_coding_gene	Symbols: HT1 | Protein kinase superfamily protein | chr1:23090243-23091529 FORWARD LENGTH=345	NONE	NONE	NONE
Chr1:23109950-23110299	hyper	15	0	44	0.0021	0.3075	146.68	NONE	NONE	NONE	NONE	NONE	NONE	AT1G62430-AT1G62440
Chr1:23117800-23118299	hyper	35	0	174	0.0656	0.2618	3.9923	NONE	NONE	NONE	NONE	AT1TE76210|AT1TE76215	LTR/Copia;LTR/Copia	NONE
Chr1:23123200-23123449	hyper	10	0	52	0.1516	0.4538	2.9925	NONE	NONE	NONE	NONE	AT1TE76215	LTR/Copia	NONE
Chr1:23138500-23138699	hyper	7	0	32	0	0.235	23.4973	NONE	NONE	NONE	NONE	NONE	NONE	AT1G62510-AT1G62520
Chr1:23140350-23140549	hyper	12	0	70	0.0537	0.1633	3.0389	NONE	NONE	NONE	NONE	NONE	NONE	AT1G62510-AT1G62520
Chr1:23141050-23141299	hyper	9	0	59	0.1839	0.3605	1.9607	NONE	NONE	NONE	NONE	AT1TE76285	DNA/MuDR	NONE
Chr1:23149100-23149449	hyper	15	0	117	0.0725	0.2005	2.7653	NONE	NONE	NONE	NONE	NONE	NONE	AT1G62530-AT1G62540
Chr1:23160150-23160499	hyper	12	0	150	0.0018	0.0789	44.6133	AT1G62560	+	protein_coding_gene	Symbols: FMO GS-OX3 | flavin-monooxygenase glucosinolate S-oxygenase 3 | chr1:23159912-23162551 FORWARD LENGTH=462	NONE	NONE	NONE
Chr1:23160700-23160899	hyper	7	0	73	0.058	0.1466	2.5272	AT1G62560	+	protein_coding_gene	Symbols: FMO GS-OX3 | flavin-monooxygenase glucosinolate S-oxygenase 3 | chr1:23159912-23162551 FORWARD LENGTH=462	AT1TE76345	LINE/L1	NONE
Chr1:23181700-23182049	hyper	8	0	158	0.005	0.0426	8.4883	AT1G62610	-	protein_coding_gene	Symbols: | NAD(P)-binding Rossmann-fold superfamily protein | chr1:23181531-23182690 REVERSE LENGTH=277	NONE	NONE	NONE
Chr1:23229350-23229549	hyper	8	0	96	0.0349	0.109	3.1213	AT1G62730	-	protein_coding_gene	Symbols: | Terpenoid synthases superfamily protein | chr1:23229204-23230118 REVERSE LENGTH=304	NONE	NONE	NONE
Chr1:23236850-23238149	hyper	92	0	397	0.0431	0.3893	9.0266	AT1G62760	-	protein_coding_gene	Symbols: | Plant invertase/pectin methylesterase inhibitor superfamily protein | chr1:23237574-23238512 REVERSE LENGTH=312	AT1TE76610	DNA/MuDR	NONE
Chr1:23240000-23240249	hyper	18	0	82	0.0662	0.3673	5.5498	NONE	NONE	NONE	NONE	AT1TE76620	DNA/HAT	NONE
Chr1:23242900-23243199	hyper	12	0	70	0.1066	0.2741	2.5722	NONE	NONE	NONE	NONE	NONE	NONE	AT1G62760-AT1G62770
Chr1:23246750-23246949	hyper	7	0	38	0.019	0.257	13.5204	AT1G62770	-	protein_coding_gene	Symbols: | Plant invertase/pectin methylesterase inhibitor superfamily protein | chr1:23246085-23246836 REVERSE LENGTH=204	NONE	NONE	NONE
Chr1:23312800-23313049	hyper	8	0	61	0.1265	0.3577	2.8281	NONE	NONE	NONE	NONE	AT1TE76830	LTR/Copia	NONE
Chr1:23322100-23322449	hyper	13	0	70	0.0035	0.2036	58.7508	NONE	NONE	NONE	NONE	NONE	NONE	AT1G62960-AT1G62970
Chr1:23324550-23324749	hyper	7	0	93	0.0222	0.1405	6.3221	AT1G62970	+	protein_coding_gene	Symbols: | Chaperone DnaJ-domain superfamily protein | chr1:23323358-23325751 FORWARD LENGTH=797	NONE	NONE	NONE
Chr1:23334800-23335099	hyper	9	0	62	0	0.4134	41.3442	AT1G62981	+	protein_coding_gene	Symbols: | Protein of unknown function (DUF1191) | chr1:23333793-23334824 FORWARD LENGTH=343	NONE	NONE	NONE
Chr1:23345300-23345599	hyper	10	0	67	0.0048	0.214	44.5919	NONE	NONE	NONE	NONE	NONE	NONE	AT1G63000-AT1G63010
Chr1:23355200-23355499	hyper	8	0	103	0.0188	0.0872	4.6412	AT1G63020	-	protein_coding_gene	Symbols: NRPD1A, POL IVA, SDE4, NRPD1, SMD2 | nuclear RNA polymerase D1A | chr1:23355329-23361126 REVERSE LENGTH=1453	NONE	NONE	NONE
Chr1:23368550-23368949	hyper	29	0	117	0.0017	0.2756	164.102	NONE	NONE	NONE	NONE	AT1TE76985	DNA	NONE
Chr1:23374100-23374399	hyper	9	0	58	0.0022	0.112	50.527	NONE	NONE	NONE	NONE	NONE	NONE	AT1G63030-AT1G63050
Chr1:23398200-23398649	hyper	23	0	104	0.0221	0.2265	10.2687	NONE	NONE	NONE	NONE	AT1TE77065	LINE/L1	NONE
Chr1:23400950-23401299	hyper	8	0	158	0.0024	0.0477	19.9343	AT1G63100	-	protein_coding_gene	Symbols: | GRAS family transcription factor | chr1:23399391-23401367 REVERSE LENGTH=658	NONE	NONE	NONE
Chr1:23430650-23430949	hyper	11	0	47	0.0762	0.2184	2.8663	NONE	NONE	NONE	NONE	NONE	NONE	AT1G63180-AT1G63190
Chr1:23436000-23436249	hyper	8	0	60	0.1429	0.3565	2.4958	NONE	NONE	NONE	NONE	NONE	NONE	AT1G63200-AT1G63205
Chr1:23463150-23463499	hyper	14	0	122	0.0085	0.1317	15.4184	AT1G63250	-	protein_coding_gene	Symbols: | DEA(D/H)-box RNA helicase family protein | chr1:23463284-23466451 REVERSE LENGTH=798	NONE	NONE	NONE
Chr1:23519400-23519699	hyper	7	0	65	0.0424	0.3062	7.2266	NONE	NONE	NONE	NONE	AT1TE77440	RC/Helitron	NONE
Chr1:23533250-23533449	hyper	7	0	85	0.0663	0.1469	2.2175	AT1G63450	+	protein_coding_gene	Symbols: RHS8 | root hair specific 8 | chr1:23532523-23534517 FORWARD LENGTH=664	NONE	NONE	NONE
Chr1:2359450-2359749	hyper	9	0	64	0.0275	0.1077	3.913	AT1G07650	-	protein_coding_gene	Symbols: | Leucine-rich repeat transmembrane protein kinase | chr1:2359817-2366423 REVERSE LENGTH=1014	NONE	NONE	NONE
Chr1:23596450-23596649	hyper	7	0	70	0.0061	0.2721	44.8998	NONE	NONE	NONE	NONE	NONE	NONE	AT1G63640-AT1G63650
Chr1:23613300-23613749	hyper	18	0	84	0.0558	0.3106	5.5621	NONE	NONE	NONE	NONE	AT1TE77760	DNA/Pogo	NONE
Chr1:23637750-23638099	hyper	13	0	73	0.004	0.1944	48.005	NONE	NONE	NONE	NONE	NONE	NONE	AT1G63720-AT1G63730
Chr1:23639750-23639949	hyper	7	0	51	0.0395	0.2709	6.8634	NONE	NONE	NONE	NONE	NONE	NONE	AT1G63720-AT1G63730
Chr1:23640700-23640949	hyper	7	0	41	0.107	0.3352	3.1342	NONE	NONE	NONE	NONE	NONE	NONE	AT1G63720-AT1G63730
Chr1:23693050-23693299	hyper	7	0	67	0	0.2988	29.878	NONE	NONE	NONE	NONE	NONE	NONE	AT1G63840-AT1G63850
Chr1:23693700-23694049	hyper	10	0	45	0.0023	0.2644	115.416	NONE	NONE	NONE	NONE	NONE	NONE	AT1G63840-AT1G63850
Chr1:23709900-23710149	hyper	9	0	68	0.098	0.2149	2.192	AT1G63870	-	protein_coding_gene	Symbols: | Disease resistance protein (TIR-NBS-LRR class) family | chr1:23707131-23711901 REVERSE LENGTH=1031	AT1TE78070	RC/Helitron	NONE
Chr1:23723200-23723649	hyper	18	0	80	0.037	0.3054	8.2604	NONE	NONE	NONE	NONE	NONE	NONE	AT1G63910-AT1G63930
Chr1:23735300-23735649	hyper	11	0	112	0.0068	0.1864	27.3668	AT1G63950	+	protein_coding_gene	Symbols: | Heavy metal transport/detoxification superfamily protein | chr1:23735000-23735556 FORWARD LENGTH=113	NONE	NONE	NONE
Chr1:23736350-23736599	hyper	7	0	46	0.0039	0.2076	53.5678	NONE	NONE	NONE	NONE	NONE	NONE	AT1G63950-AT1G63960
Chr1:23755350-23756149	hyper	52	0	288	0.012	0.1371	11.41	NONE	NONE	NONE	NONE	AT1TE78195	RC/Helitron	NONE
Chr1:23799850-23800299	hyper	21	0	165	0.0531	0.1626	3.0621	AT1G64110	-	protein_coding_gene	Symbols: | P-loop containing nucleoside triphosphate hydrolases superfamily protein | chr1:23796887-23801240 REVERSE LENGTH=824	NONE	NONE	NONE
Chr1:23810200-23810499	hyper	7	0	95	0.038	0.1009	2.657	AT1G64150	-	protein_coding_gene	Symbols: | Uncharacterized protein family (UPF0016) | chr1:23809047-23812579 REVERSE LENGTH=370	NONE	NONE	NONE
Chr1:23815800-23816149	hyper	11	0	153	0.0109	0.0629	5.7951	AT1G64170	-	protein_coding_gene	Symbols: ATCHX16, CHX16 | cation/H+ exchanger 16 | chr1:23815239-23818293 REVERSE LENGTH=811	NONE	NONE	NONE
Chr1:23822850-23823149	hyper	12	0	132	0.0587	0.1406	2.397	AT1G64180	+	protein_coding_gene	Symbols: | intracellular protein transport protein USO1-related | chr1:23821640-23824193 FORWARD LENGTH=593	NONE	NONE	NONE
Chr1:23831650-23831999	hyper	8	0	133	0.0044	0.0426	9.6792	AT1G64210	+	protein_coding_gene	Symbols: | Leucine-rich repeat protein kinase family protein | chr1:23831033-23832863 FORWARD LENGTH=587	NONE	NONE	NONE
Chr1:23856150-23856599	hyper	29	0	123	0.0429	0.3492	8.1353	NONE	NONE	NONE	NONE	AT1TE78500|AT1TE78505	RC/Helitron;RC/Helitron	NONE
Chr1:23862350-23862599	hyper	10	0	73	0.0134	0.1662	12.4391	NONE	NONE	NONE	NONE	NONE	NONE	AT1G64295-AT1G64300
Chr1:239300-239499	hyper	8	0	42	0.0879	0.3287	3.7395	NONE	NONE	NONE	NONE	NONE	NONE	AT1G01650-AT1G01660
Chr1:23932350-23932699	hyper	13	0	43	0.1468	0.4943	3.366	NONE	NONE	NONE	NONE	NONE	NONE	AT1G64405-AT1G64430
Chr1:23946650-23946999	hyper	18	0	90	0.0669	0.3875	5.7888	NONE	NONE	NONE	NONE	NONE	NONE	AT1G64470-AT1G64480
Chr1:2396850-2397049	hyper	9	0	56	0.0048	0.1003	20.9318	AT1G07725	-	protein_coding_gene	Symbols: ATEXO70H6, EXO70H6 | exocyst subunit exo70 family protein H6 | chr1:2395249-2397096 REVERSE LENGTH=615	NONE	NONE	NONE
Chr1:24064250-24064449	hyper	8	0	78	0.0677	0.2093	3.0929	NONE	NONE	NONE	NONE	AT1TE79130	DNA/HAT	NONE
Chr1:24092100-24092449	hyper	9	2	154	0.0383	0.1118	2.9193	AT1G64830	-	protein_coding_gene	Symbols: | Eukaryotic aspartyl protease family protein | chr1:24091271-24092566 REVERSE LENGTH=431	NONE	NONE	NONE
Chr1:2415000-2415399	hyper	14	0	179	0.0704	0.228	3.2398	NONE	NONE	NONE	NONE	AT1TE07880	LINE/L1	NONE
Chr1:24223100-24223399	hyper	12	1	111	0.0986	0.2519	2.5548	NONE	NONE	NONE	NONE	AT1TE79660	DNA/HAT	NONE
Chr1:24225400-24225899	hyper	25	0	167	0.0147	0.0987	6.7288	AT1G65210	+	protein_coding_gene	Symbols: | Galactose-binding protein | chr1:24224812-24225815 FORWARD LENGTH=248	NONE	NONE	NONE
Chr1:24291300-24291949	hyper	40	0	183	0.1112	0.3521	3.1649	NONE	NONE	NONE	NONE	NONE	NONE	AT1G65380-AT1G65390
Chr1:24331150-24331499	hyper	11	0	109	0.0048	0.2073	42.955	AT1G65480	+	protein_coding_gene	Symbols: FT | PEBP (phosphatidylethanolamine-binding protein) family protein | chr1:24331510-24333689 FORWARD LENGTH=175	NONE	NONE	NONE
Chr1:24350550-24350749	hyper	7	0	48	0.1024	0.3441	3.3598	NONE	NONE	NONE	NONE	AT1TE80035	DNA/MuDR	NONE
Chr1:24369100-24369399	hyper	9	0	92	0.0137	0.2378	17.3591	AT1G65550	-	protein_coding_gene	Symbols: | Xanthine/uracil permease family protein | chr1:24367694-24370800 REVERSE LENGTH=541	NONE	NONE	NONE
Chr1:24374700-24375049	hyper	12	0	151	0.019	0.0933	4.9027	AT1G65570	-	protein_coding_gene	Symbols: | Pectin lyase-like superfamily protein | chr1:24374098-24375846 REVERSE LENGTH=397	NONE	NONE	NONE
Chr1:24384200-24384649	hyper	22	0	143	0.0731	0.3039	4.1557	NONE	NONE	NONE	NONE	NONE	NONE	AT1G65580-AT1G65590
Chr1:24395600-24396099	hyper	19	0	112	0.0884	0.3632	4.1084	NONE	NONE	NONE	NONE	NONE	NONE	AT1G65610-AT1G65620
Chr1:24426500-24426799	hyper	9	0	71	0.0029	0.1962	67.5073	NONE	NONE	NONE	NONE	NONE	NONE	AT1G65670-AT1G65680
Chr1:24447800-24448199	hyper	15	0	137	0.0036	0.1744	48.2735	NONE	NONE	NONE	NONE	NONE	NONE	AT1G65730-AT1G65740
Chr1:24454650-24454999	hyper	13	0	115	0.0965	0.2731	2.8304	NONE	NONE	NONE	NONE	AT1TE80320	LINE/L1	NONE
Chr1:24483350-24483949	hyper	34	0	178	0.0073	0.2506	34.4365	NONE	NONE	NONE	NONE	AT1TE80400|AT1TE80405	DNA/Harbinger;RC/Helitron	NONE
Chr1:24512900-24513199	hyper	8	0	129	0.0023	0.051	22.2696	AT1G65890	-	protein_coding_gene	Symbols: AAE12 | acyl activating enzyme 12 | chr1:24512598-24514611 REVERSE LENGTH=578	NONE	NONE	NONE
Chr1:24536450-24536949	hyper	49	0	171	0.0018	0.3412	188.007	NONE	NONE	NONE	NONE	NONE	NONE	AT1G65920-AT1G65930
Chr1:24571950-24572199	hyper	10	0	108	0.0441	0.1252	2.8423	AT1G65990	-	protein_coding_gene	Symbols: | type 2 peroxiredoxin-related / thiol specific antioxidant / mal allergen family protein | chr1:24571603-24573471 REVERSE LENGTH=553	NONE	NONE	NONE
Chr1:24576500-24576849	hyper	11	0	92	0.0606	0.1964	3.2414	NONE	NONE	NONE	NONE	AT1TE80720	RC/Helitron	NONE
Chr1:24604150-24604599	hyper	19	0	119	0.0018	0.1457	80.4024	AT1G66090	+	protein_coding_gene	Symbols: | Disease resistance protein (TIR-NBS class) | chr1:24602221-24604573 FORWARD LENGTH=429	NONE	NONE	NONE
Chr1:24614050-24614399	hyper	15	0	135	0.0035	0.1199	34.5887	AT1G66120	+	protein_coding_gene	Symbols: | AMP-dependent synthetase and ligase family protein | chr1:24612640-24614690 FORWARD LENGTH=572	NONE	NONE	NONE
Chr1:24620150-24620799	hyper	68	1	292	0.1072	0.3086	2.8785	AT1G66140	-	protein_coding_gene	Symbols: ZFP4 | zinc finger protein 4 | chr1:24620063-24620845 REVERSE LENGTH=260	NONE	NONE	NONE
Chr1:24636450-24636699	hyper	8	0	67	0.0027	0.2244	81.6667	NONE	NONE	NONE	NONE	NONE	NONE	AT1G66150-AT1G66160
Chr1:24666750-24667099	hyper	11	0	121	0.0194	0.0968	4.9938	AT1G66210	-	protein_coding_gene	Symbols: | Subtilisin-like serine endopeptidase family protein | chr1:24665735-24668650 REVERSE LENGTH=759	NONE	NONE	NONE
Chr1:24714800-24715049	hyper	12	0	79	0.1362	0.3465	2.5435	AT1G66290	-	protein_coding_gene	Symbols: | F-box/RNI-like superfamily protein | chr1:24713306-24714843 REVERSE LENGTH=453	NONE	NONE	NONE
Chr1:24717850-24718199	hyper	18	0	118	0.1152	0.2578	2.2371	AT1G66300	-	protein_coding_gene	Symbols: | F-box/RNI-like/FBD-like domains-containing protein | chr1:24716497-24718050 REVERSE LENGTH=456	AT1TE81190	RC/Helitron	NONE
Chr1:24728250-24728899	hyper	38	0	209	0.0261	0.239	9.1663	AT1G66320	-	protein_coding_gene	Symbols: | F-box/RNI-like superfamily protein | chr1:24727041-24728614 REVERSE LENGTH=457	AT1TE81230	DNA/MuDR	NONE
Chr1:24764400-24764749	hyper	13	0	40	0.0032	0.2283	71.9726	AT1G66390	+	protein_coding_gene	Symbols: ATMYB90, PAP2, MYB90 | myb domain protein 90 | chr1:24764052-24765400 FORWARD LENGTH=249	NONE	NONE	NONE
Chr1:24787100-24787299	hyper	8	0	82	0.1028	0.2088	2.0317	AT1G66450	+	protein_coding_gene	Symbols: | Cysteine/Histidine-rich C1 domain family protein | chr1:24786200-24788302 FORWARD LENGTH=700	NONE	NONE	NONE
Chr1:24819100-24819299	hyper	8	0	72	0.0665	0.1566	2.3556	AT1G66530	-	protein_coding_gene	Symbols: | Arginyl-tRNA synthetase, class Ic | chr1:24819064-24822277 REVERSE LENGTH=590	NONE	NONE	NONE
Chr1:24823100-24823749	hyper	43	0	174	0.0067	0.3331	49.6319	NONE	NONE	NONE	NONE	AT1TE81525	RC/Helitron	NONE
Chr1:24835900-24836249	hyper	13	0	105	0.0091	0.1358	14.8685	AT1G66570	-	protein_coding_gene	Symbols: ATSUC7, SUC7 | sucrose-proton symporter 7 | chr1:24835309-24837242 REVERSE LENGTH=491	NONE	NONE	NONE
Chr1:24836400-24837149	hyper	34	3	318	0.0152	0.0905	5.9489	AT1G66570	-	protein_coding_gene	Symbols: ATSUC7, SUC7 | sucrose-proton symporter 7 | chr1:24835309-24837242 REVERSE LENGTH=491	NONE	NONE	NONE
Chr1:24845200-24845449	hyper	9	0	61	0	0.2589	25.8883	NONE	NONE	NONE	NONE	NONE	NONE	AT1G66590-AT1G66600
Chr1:24897800-24897999	hyper	7	0	37	0.0385	0.3408	8.8612	NONE	NONE	NONE	NONE	NONE	NONE	AT1G66750-AT1G66760
Chr1:24901350-24901699	hyper	13	0	98	0.0159	0.2131	13.3907	NONE	NONE	NONE	NONE	AT1TE81815	LINE?	NONE
Chr1:24910000-24910299	hyper	12	0	131	0.0394	0.0988	2.509	AT1G66780	+	protein_coding_gene	Symbols: | MATE efflux family protein | chr1:24909213-24911485 FORWARD LENGTH=485	NONE	NONE	NONE
Chr1:24917400-24917699	hyper	9	0	79	0.0771	0.2071	2.6864	NONE	NONE	NONE	NONE	AT1TE81850	LTR/Copia	NONE
Chr1:24940600-24940799	hyper	7	0	51	0	0.1548	15.475	NONE	NONE	NONE	NONE	NONE	NONE	AT1G66855-AT1G66860
Chr1:24948350-24948749	hyper	26	0	87	0.0913	0.3136	3.435	AT1G66880	+	protein_coding_gene	Symbols: | Protein kinase superfamily protein | chr1:24946928-24955438 FORWARD LENGTH=1296	AT1TE81950	DNA	NONE
Chr1:24954450-24954849	hyper	24	1	144	0.0977	0.25	2.5591	AT1G66880	+	protein_coding_gene	Symbols: | Protein kinase superfamily protein | chr1:24946928-24955438 FORWARD LENGTH=1296	NONE	NONE	NONE
Chr1:24955550-24955999	hyper	23	0	158	0.1199	0.3868	3.2276	AT1G66880	+	protein_coding_gene	Symbols: | Protein kinase superfamily protein | chr1:24946928-24955438 FORWARD LENGTH=1296	AT1TE81980	RC/Helitron	NONE
Chr1:24998300-24998649	hyper	14	0	133	0.0223	0.1011	4.53	AT1G66980	-	protein_coding_gene	Symbols: SNC4 | suppressor of npr1-1 constitutive 4 | chr1:24997491-25001961 REVERSE LENGTH=1118	NONE	NONE	NONE
Chr1:25008350-25008549	hyper	8	0	44	0.0052	0.2255	43.0742	NONE	NONE	NONE	NONE	NONE	NONE	AT1G67000-AT1G67020
Chr1:25026450-25026799	hyper	11	0	76	0	0.332	33.2046	NONE	NONE	NONE	NONE	NONE	NONE	AT1G67040-AT1G67050
Chr1:25032850-25033199	hyper	16	0	116	0.0034	0.2391	70.4106	NONE	NONE	NONE	NONE	NONE	NONE	AT1G67050-AT1G67060
Chr1:25034300-25034499	hyper	7	0	34	0.0217	0.2938	13.5125	NONE	NONE	NONE	NONE	AT1TE82220	RC/Helitron	NONE
Chr1:25056150-25056449	hyper	11	0	60	0.1259	0.3303	2.6227	NONE	NONE	NONE	NONE	NONE	NONE	AT1G67100-AT1G67110
Chr1:25057300-25057599	hyper	14	0	92	0.098	0.309	3.1523	NONE	NONE	NONE	NONE	NONE	NONE	AT1G67100-AT1G67110
Chr1:25121400-25121649	hyper	9	0	68	0	0.1755	17.551	AT1G67148	+	protein_coding_gene	Symbols: | unknown protein; Has 1 Blast hits to 1 proteins in 1 species: Archae - 0; Bacteria - 0; Metazoa - 0; Fungi - 0; Plants - 1; Viruses - 0; Other Eukaryotes - 0 (source: NCBI BLink). | chr1:25121297-25121673 FORWARD LENGTH=45	NONE	NONE	NONE
Chr1:25125750-25126449	hyper	53	0	187	0.0083	0.2769	33.4854	AT1G67160	-	protein_coding_gene	Symbols: | F-box family protein with a domain of unknown function (DUF295) | chr1:25124819-25127098 REVERSE LENGTH=450	NONE	NONE	NONE
Chr1:25150800-25151149	hyper	12	0	78	0.011	0.2938	26.6877	NONE	NONE	NONE	NONE	NONE	NONE	AT1G67220-AT1G67230
Chr1:25158550-25159049	hyper	28	0	117	0.0894	0.4002	4.4765	NONE	NONE	NONE	NONE	AT1TE82600	DNA/MuDR	NONE
Chr1:25163400-25163749	hyper	15	0	76	0.106	0.3415	3.2211	AT1G67250	-	protein_coding_gene	Symbols: | Proteasome maturation factor UMP1 | chr1:25163808-25164967 REVERSE LENGTH=141	AT1TE82600	DNA/MuDR	NONE
Chr1:25215800-25216249	hyper	16	0	111	0.0349	0.2615	7.4986	NONE	NONE	NONE	NONE	NONE	NONE	AT1G67330-AT1G67340
Chr1:2521750-2522249	hyper	35	0	162	0.0016	0.3494	215.418	NONE	NONE	NONE	NONE	AT1TE08220	RC/Helitron	NONE
Chr1:25247800-25248099	hyper	8	0	46	0.1276	0.3594	2.8163	AT1G67400	-	protein_coding_gene	Symbols: | ELMO/CED-12 family protein | chr1:25248099-25250664 REVERSE LENGTH=281	AT1TE82845|AT1TE82850	RC/Helitron;DNA/Mariner	NONE
Chr1:25260650-25261449	hyper	51	0	245	0.0141	0.264	18.7899	NONE	NONE	NONE	NONE	NONE	NONE	AT1G67420-AT1G67430
Chr1:2526600-2527299	hyper	20	0	163	0.0131	0.2033	15.4751	AT1G08100	-	protein_coding_gene	Symbols: ATNRT2.2, ACH2, NRT2;2AT, NRT2.2 | nitrate transporter 2.2 | chr1:2527268-2529078 REVERSE LENGTH=522	AT1TE08230	LTR/Gypsy	NONE
Chr1:25278950-25279199	hyper	8	0	106	0.0847	0.2028	2.3943	NONE	NONE	NONE	NONE	NONE	NONE	AT1G67480-AT1G67490
Chr1:2531250-2531449	hyper	12	0	68	0.0583	0.2676	4.5934	NONE	NONE	NONE	NONE	NONE	NONE	AT1G08100-AT1G08110
Chr1:25324600-25324899	hyper	8	0	48	0	0.3535	35.3535	NONE	NONE	NONE	NONE	NONE	NONE	AT1G67560-AT1G67570
Chr1:25332450-25332849	hyper	28	0	163	0.0239	0.2197	9.2041	NONE	NONE	NONE	NONE	NONE	NONE	AT1G67580-AT1G67590
Chr1:25333100-25333399	hyper	11	0	69	0.0101	0.2505	24.7233	AT1G67590	-	protein_coding_gene	Symbols: | Remorin family protein | chr1:25333137-25334472 REVERSE LENGTH=347	NONE	NONE	NONE
Chr1:25344250-25344599	hyper	13	0	126	0.1259	0.2678	2.1279	AT1G67630	-	protein_coding_gene	Symbols: POLA2 | DNA polymerase alpha 2 | chr1:25344573-25348287 REVERSE LENGTH=620	AT1TE83185	DNA/HAT	NONE
Chr1:2534750-2535049	hyper	13	0	60	0.0955	0.3522	3.6899	NONE	NONE	NONE	NONE	AT1TE08240	DNA/HAT	NONE
Chr1:25349950-25350199	hyper	8	0	82	0.0018	0.1109	60.3203	AT1G67635	+	protein_coding_gene	Symbols: | BEST Arabidopsis thaliana protein match is: phosphatidylinositol 3- and 4-kinase family protein (TAIR:AT1G27570.1); Has 50 Blast hits to 50 proteins in 8 species: Archae - 0; Bacteria - 0; Metazoa - 0; Fungi - 0; Plants - 50; Viruses - 0; Other Eukaryotes - 0 (source: NCBI BLink). | chr1:25349820-25350152 FORWARD LENGTH=110	NONE	NONE	NONE
Chr1:25378900-25379249	hyper	12	0	70	0	0.2642	26.4169	AT1G67710	-	protein_coding_gene	Symbols: ARR11 | response regulator 11 | chr1:25376994-25378905 REVERSE LENGTH=521	NONE	NONE	NONE
Chr1:25402850-25403199	hyper	10	0	131	0.0052	0.1007	19.2339	AT1G67750	+	protein_coding_gene	Symbols: | Pectate lyase family protein | chr1:25401660-25403165 FORWARD LENGTH=408	NONE	NONE	NONE
Chr1:25449450-25449649	hyper	7	0	70	0.1526	0.3199	2.0965	AT1G67870	-	protein_coding_gene	Symbols: | glycine-rich protein | chr1:25449593-25450943 REVERSE LENGTH=279	NONE	NONE	NONE
Chr1:25450150-25451099	hyper	42	0	335	0.1334	0.2854	2.1384	AT1G67870	-	protein_coding_gene	Symbols: | glycine-rich protein | chr1:25449593-25450943 REVERSE LENGTH=279	NONE	NONE	NONE
Chr1:25452750-25453349	hyper	32	0	220	0.0929	0.2535	2.729	AT1G67875	+	protein_coding_gene	Symbols: | unknown protein; LOCATED IN: endomembrane system; Has 30201 Blast hits to 17322 proteins in 780 species: Archae - 12; Bacteria - 1396; Metazoa - 17338; Fungi - 3422; Plants - 5037; Viruses - 0; Other Eukaryotes - 2996 (source: NCBI BLink). | chr1:25452699-25452893 FORWARD LENGTH=64	NONE	NONE	NONE
Chr1:25525400-25525749	hyper	10	0	154	0.0311	0.1103	3.546	AT1G68110	+	protein_coding_gene	Symbols: | ENTH/ANTH/VHS superfamily protein | chr1:25524901-25526040 FORWARD LENGTH=379	NONE	NONE	NONE
Chr1:25525900-25526099	hyper	7	0	48	0.1037	0.2807	2.7072	AT1G68110	+	protein_coding_gene	Symbols: | ENTH/ANTH/VHS superfamily protein | chr1:25524901-25526040 FORWARD LENGTH=379	NONE	NONE	NONE
Chr1:25555000-25555199	hyper	9	0	93	0.0719	0.1653	2.3005	AT1G68180	+	protein_coding_gene	Symbols: | RING/U-box superfamily protein | chr1:25554816-25555562 FORWARD LENGTH=248	NONE	NONE	NONE
Chr1:25559700-25559899	hyper	7	0	48	0.0866	0.2776	3.2042	AT1G68190	+	protein_coding_gene	Symbols: | B-box zinc finger family protein | chr1:25559384-25561004 FORWARD LENGTH=356	NONE	NONE	NONE
Chr1:25569650-25570149	hyper	18	0	139	0.0052	0.1863	35.554	NONE	NONE	NONE	NONE	AT1TE83880	DNA/MuDR	NONE
Chr1:255750-256099	hyper	13	0	102	0.0407	0.1915	4.6988	NONE	NONE	NONE	NONE	AT1TE00820|AT1TE00825	RC/Helitron;DNA/Pogo	NONE
Chr1:25593400-25593749	hyper	12	0	133	0.0226	0.1187	5.25	AT1G68280	-	protein_coding_gene	Symbols: | Thioesterase superfamily protein | chr1:25592467-25593595 REVERSE LENGTH=188	NONE	NONE	NONE
Chr1:25594850-25595899	hyper	67	1	352	0.0598	0.3166	5.2948	NONE	NONE	NONE	NONE	AT1TE83945|AT1TE83950	DNA/HAT;LTR/Gypsy	NONE
Chr1:25646400-25647199	hyper	40	0	297	0.0688	0.1874	2.722	AT1G68400	-	protein_coding_gene	Symbols: | leucine-rich repeat transmembrane protein kinase family protein | chr1:25646401-25648916 REVERSE LENGTH=670	NONE	NONE	NONE
Chr1:25650200-25650549	hyper	10	0	146	0.0419	0.1061	2.5335	AT1G68410	-	protein_coding_gene	Symbols: | Protein phosphatase 2C family protein | chr1:25650262-25652255 REVERSE LENGTH=436	NONE	NONE	NONE
Chr1:25673400-25673849	hyper	18	0	100	0.0058	0.1969	33.954	NONE	NONE	NONE	NONE	NONE	NONE	AT1G68460-AT1G68470
Chr1:25675750-25677049	hyper	122	0	447	0.0459	0.2802	6.1053	AT1G68470	-	protein_coding_gene	Symbols: | Exostosin family protein | chr1:25676545-25678267 REVERSE LENGTH=455	AT1TE84185	RC/Helitron	NONE
Chr1:25705000-25705349	hyper	10	0	91	0.0372	0.1439	3.8638	NONE	NONE	NONE	NONE	AT1TE84265|AT1TE84270	RC/Helitron;RathE2_cons	NONE
Chr1:25718750-25718999	hyper	9	0	34	0.0053	0.2155	40.6187	NONE	NONE	NONE	NONE	NONE	NONE	AT1G68530-AT1G68540
Chr1:25750750-25750999	hyper	8	0	48	0.173	0.3794	2.1927	NONE	NONE	NONE	NONE	NONE	NONE	AT1G68570-AT1G68580
Chr1:25779450-25779749	hyper	10	0	62	0.1749	0.3906	2.2332	NONE	NONE	NONE	NONE	AT1TE84520	RC/Helitron	NONE
Chr1:25819000-25819249	hyper	7	0	41	0.0378	0.2277	6.0243	NONE	NONE	NONE	NONE	NONE	NONE	AT1G68740-AT1G68750
Chr1:25831100-25831449	hyper	13	0	62	0.009	0.2998	33.1305	NONE	NONE	NONE	NONE	NONE	NONE	AT1G68765-AT1G68780
Chr1:25882600-25882999	hyper	20	0	113	0.0515	0.2097	4.0684	AT1G68845	+	protein_coding_gene	Symbols: | unknown protein; Has 2 Blast hits to 2 proteins in 1 species: Archae - 0; Bacteria - 0; Metazoa - 0; Fungi - 0; Plants - 2; Viruses - 0; Other Eukaryotes - 0 (source: NCBI BLink). | chr1:25882434-25882918 FORWARD LENGTH=138	NONE	NONE	NONE
Chr1:25963250-25963499	hyper	8	0	70	0.0108	0.1299	12.0062	NONE	NONE	NONE	NONE	AT1TE85075	RC/Helitron	NONE
Chr1:26035050-26035399	hyper	17	0	129	0.0695	0.1948	2.8015	AT1G69250	+	protein_coding_gene	Symbols: | Nuclear transport factor 2 (NTF2) family protein with RNA binding (RRM-RBD-RNP motifs) domain | chr1:26033163-26035301 FORWARD LENGTH=427	AT1TE85290	RC/Helitron	NONE
Chr1:26091100-26091499	hyper	15	0	100	0.0076	0.1154	15.1282	NONE	NONE	NONE	NONE	NONE	NONE	AT1G69410-AT1G69420
Chr1:26111200-26111499	hyper	7	0	71	0.1421	0.4743	3.3372	NONE	NONE	NONE	NONE	NONE	NONE	AT1G69450-AT1G69460
Chr1:26121300-26121699	hyper	16	0	61	0	0.3142	31.4172	NONE	NONE	NONE	NONE	NONE	NONE	AT1G69485-AT1G69490
Chr1:26179700-26180199	hyper	27	0	175	0.0479	0.2619	5.4684	NONE	NONE	NONE	NONE	NONE	NONE	AT1G69588-AT1G69600
Chr1:26185800-26186099	hyper	8	0	78	0.0169	0.4443	26.214	NONE	NONE	NONE	NONE	NONE	NONE	AT1G69600-AT1G69610
Chr1:26325000-26325499	hyper	45	0	163	0.0059	0.2752	46.2865	NONE	NONE	NONE	NONE	NONE	NONE	AT1G69890-AT1G69900
Chr1:26335750-26335949	hyper	10	0	67	0.0227	0.2492	10.988	NONE	NONE	NONE	NONE	NONE	NONE	AT1G69920-AT1G69930
Chr1:26343450-26343699	hyper	12	1	83	0.1014	0.2457	2.4229	AT1G69940	-	protein_coding_gene	Symbols: ATPPME1, PPME1 | Pectin lyase-like superfamily protein | chr1:26343549-26344971 REVERSE LENGTH=361	NONE	NONE	NONE
Chr1:26344250-26345249	hyper	101	1	336	0.0438	0.3062	6.9886	AT1G69940	-	protein_coding_gene	Symbols: ATPPME1, PPME1 | Pectin lyase-like superfamily protein | chr1:26343549-26344971 REVERSE LENGTH=361	NONE	NONE	NONE
Chr1:26359950-26360299	hyper	14	0	83	0.1069	0.2653	2.4819	AT1G69990	-	protein_coding_gene	Symbols: | Leucine-rich repeat protein kinase family protein | chr1:26360235-26362010 REVERSE LENGTH=591	AT1TE86330|AT1TE86335|AT1TE86340	RC/Helitron;RC/Helitron;RC/Helitron	NONE
Chr1:26379400-26379749	hyper	10	0	98	0.0022	0.0965	43.1363	AT1G70030	+	protein_coding_gene	Symbols: | Paired amphipathic helix (PAH2) superfamily protein | chr1:26379218-26380191 FORWARD LENGTH=160	NONE	NONE	NONE
Chr1:26380450-26380699	hyper	7	0	78	0.0176	0.1625	9.2228	NONE	NONE	NONE	NONE	NONE	NONE	AT1G70030-AT1G70040
Chr1:26395150-26395349	hyper	7	0	96	0.0106	0.1077	10.1933	AT1G70080	-	protein_coding_gene	Symbols: | Terpenoid cyclases/Protein prenyltransferases superfamily protein | chr1:26394669-26397565 REVERSE LENGTH=611	NONE	NONE	NONE
Chr1:26411350-26411699	hyper	16	1	152	0.0863	0.1841	2.1339	AT1G70130	-	protein_coding_gene	Symbols: | Concanavalin A-like lectin protein kinase family protein | chr1:26409743-26411801 REVERSE LENGTH=656	NONE	NONE	NONE
Chr1:26423600-26423849	hyper	11	0	22	0.0181	0.2607	14.3938	NONE	NONE	NONE	NONE	AT1TE86545	DNA	NONE
Chr1:26511200-26511549	hyper	10	0	95	0.0784	0.2228	2.8419	NONE	NONE	NONE	NONE	AT1TE86795|AT1TE86800|AT1TE86805	RC/Helitron;RC/Helitron;RC/Helitron	NONE
Chr1:26524850-26525399	hyper	23	0	156	0.0289	0.2122	7.3478	NONE	NONE	NONE	NONE	NONE	NONE	AT1G70370-AT1G70380
Chr1:26529200-26529549	hyper	12	0	126	0.0023	0.0972	42.0437	AT1G70390	-	protein_coding_gene	Symbols: | F-box and associated interaction domains-containing protein | chr1:26529171-26530282 REVERSE LENGTH=332	NONE	NONE	NONE
Chr1:26551300-26551599	hyper	11	0	85	0.1161	0.312	2.6869	NONE	NONE	NONE	NONE	AT1TE86940	RC/Helitron	NONE
Chr1:2657900-2658349	hyper	26	0	158	0.0128	0.2408	18.7578	NONE	NONE	NONE	NONE	AT1TE08660	LTR/Gypsy	NONE
Chr1:26602550-26602949	hyper	17	0	118	0.0033	0.1771	53.2314	NONE	NONE	NONE	NONE	AT1TE87100	RC/Helitron	NONE
Chr1:26634750-26635199	hyper	23	0	118	0.0022	0.2751	127.645	NONE	NONE	NONE	NONE	NONE	NONE	AT1G70630-AT1G70640
Chr1:26677950-26678299	hyper	12	0	86	0.0957	0.3405	3.5568	NONE	NONE	NONE	NONE	AT1TE87330	RC/Helitron	NONE
Chr1:26684750-26685199	hyper	22	0	111	0	0.2615	26.149	NONE	NONE	NONE	NONE	NONE	NONE	AT1G70750-AT1G70760
Chr1:26699400-26699749	hyper	11	0	83	0.0092	0.1237	13.4576	NONE	NONE	NONE	NONE	AT1TE87385	RC/Helitron	NONE
Chr1:26710450-26710749	hyper	10	0	110	0.045	0.1164	2.5862	AT1G70830	-	protein_coding_gene	Symbols: MLP28 | MLP-like protein 28 | chr1:26710203-26711395 REVERSE LENGTH=335	NONE	NONE	NONE
Chr1:26713650-26714049	hyper	17	0	144	0.0447	0.169	3.7828	AT1G70840	-	protein_coding_gene	Symbols: MLP31 | MLP-like protein 31 | chr1:26713170-26714014 REVERSE LENGTH=171	NONE	NONE	NONE
Chr1:26716000-26716749	hyper	23	0	252	0.0203	0.0981	4.8363	AT1G70850	-	protein_coding_gene	Symbols: MLP34 | MLP-like protein 34 | chr1:26715429-26716744 REVERSE LENGTH=316	NONE	NONE	NONE
Chr1:26724800-26725149	hyper	10	0	119	0.0022	0.0748	34.3612	NONE	NONE	NONE	NONE	NONE	NONE	AT1G70880-AT1G70890
Chr1:26725850-26726499	hyper	30	0	220	0.0055	0.1209	22.1228	AT1G70890	-	protein_coding_gene	Symbols: MLP43 | MLP-like protein 43 | chr1:26725912-26726489 REVERSE LENGTH=158	NONE	NONE	NONE
Chr1:26756150-26757499	hyper	97	0	413	0.0724	0.2855	3.9404	AT1G70960	+	protein_coding_gene	Symbols: | F-box and associated interaction domains-containing protein | chr1:26756253-26757362 FORWARD LENGTH=369	NONE	NONE	NONE
Chr1:26760700-26761149	hyper	22	0	137	0.1076	0.2362	2.1963	AT1G70970	+	protein_coding_gene	Symbols: | F-box and associated interaction domains-containing protein | chr1:26759834-26761042 FORWARD LENGTH=402	NONE	NONE	NONE
Chr1:26770950-26771699	hyper	51	0	183	0.0168	0.3559	21.2052	NONE	NONE	NONE	NONE	AT1TE87610	DNA/HAT	NONE
Chr1:26783500-26783749	hyper	8	0	104	0.0454	0.1021	2.2471	AT1G71010	+	protein_coding_gene	Symbols: FAB1C | FORMS APLOID AND BINUCLEATE CELLS 1C | chr1:26782839-26788712 FORWARD LENGTH=1648	NONE	NONE	NONE
Chr1:26916350-26916549	hyper	8	0	82	0.0889	0.2024	2.2766	AT1G71410	-	protein_coding_gene	Symbols: | ARM repeat superfamily protein | chr1:26913070-26917515 REVERSE LENGTH=909	NONE	NONE	NONE
Chr1:26939950-26940149	hyper	9	1	110	0.0506	0.1104	2.181	AT1G71530	+	protein_coding_gene	Symbols: | Protein kinase superfamily protein | chr1:26939766-26942306 FORWARD LENGTH=655	NONE	NONE	NONE
Chr1:26956600-26956899	hyper	10	0	41	0.0681	0.3375	4.9547	NONE	NONE	NONE	NONE	NONE	NONE	AT1G71692-AT1G71695
Chr1:27016600-27016949	hyper	8	0	112	0.0268	0.0749	2.7999	AT1G71820	+	protein_coding_gene	Symbols: SEC6 | SEC6 | chr1:27010022-27016745 FORWARD LENGTH=752	NONE	NONE	NONE
Chr1:27033800-27034549	hyper	23	0	177	0.0092	0.055	5.9876	AT1G71870	-	protein_coding_gene	Symbols: | MATE efflux family protein | chr1:27032456-27034895 REVERSE LENGTH=510	NONE	NONE	NONE
Chr1:27068750-27069099	hyper	13	0	79	0.1686	0.4463	2.6465	AT1G71920	+	protein_coding_gene	Symbols: HISN6B | HISTIDINE BIOSYNTHESIS 6B | chr1:27067168-27068999 FORWARD LENGTH=415	NONE	NONE	NONE
Chr1:27098950-27099199	hyper	9	0	119	0.0834	0.1788	2.1434	AT1G71980	+	protein_coding_gene	Symbols: | Protease-associated (PA) RING/U-box zinc finger family protein | chr1:27098250-27099881 FORWARD LENGTH=448	NONE	NONE	NONE
Chr1:27120950-27122049	hyper	52	0	305	0.0142	0.2881	20.2377	AT1G72080	-	protein_coding_gene	Symbols: | unknown protein; FUNCTIONS IN: molecular_function unknown; INVOLVED IN: biological_process unknown; LOCATED IN: chloroplast; Has 30201 Blast hits to 17322 proteins in 780 species: Archae - 12; Bacteria - 1396; Metazoa - 17338; Fungi - 3422; Plants - 5037; Viruses - 0; Other Eukaryotes - 2996 (source: NCBI BLink). | chr1:27120304-27122761 REVERSE LENGTH=244	NONE	NONE	NONE
Chr1:27136500-27136949	hyper	36	0	92	0.0019	0.4057	218.278	NONE	NONE	NONE	NONE	NONE	NONE	AT1G72125-AT1G72130
Chr1:27186350-27186599	hyper	7	0	72	0.0255	0.1274	5.0019	NONE	NONE	NONE	NONE	AT1TE88950	RC/Helitron	NONE
Chr1:27334150-27334349	hyper	7	0	40	0.0299	0.2994	10.0287	AT1G72580	-	protein_coding_gene	Symbols: | unknown protein; Has 3 Blast hits to 3 proteins in 2 species: Archae - 0; Bacteria - 0; Metazoa - 0; Fungi - 0; Plants - 3; Viruses - 0; Other Eukaryotes - 0 (source: NCBI BLink). | chr1:27334406-27334702 REVERSE LENGTH=98	NONE	NONE	NONE
Chr1:2740000-2740299	hyper	10	2	130	0.0355	0.0851	2.3993	AT1G08620	+	protein_coding_gene	Symbols: PKDM7D | Transcription factor jumonji (jmj) family protein / zinc finger (C5HC2 type) family protein | chr1:2737554-2743370 FORWARD LENGTH=1209	NONE	NONE	NONE
Chr1:27433900-27434199	hyper	9	0	120	0.0032	0.0884	27.2129	NONE	NONE	NONE	NONE	NONE	NONE	AT1G72900-AT1G72910
Chr1:27514800-27515299	hyper	23	0	175	0.125	0.3533	2.8263	NONE	NONE	NONE	NONE	AT1TE90030	LINE/L1	NONE
Chr1:27531950-27532149	hyper	7	0	55	0.0088	0.2884	32.5847	NONE	NONE	NONE	NONE	AT1TE90090	DNA/MuDR	NONE
Chr1:27539500-27539699	hyper	7	0	87	0.0609	0.1533	2.5165	AT1G73220	+	protein_coding_gene	Symbols: AtOCT1, 1-Oct | organic cation/carnitine transporter1 | chr1:27538387-27540109 FORWARD LENGTH=539	NONE	NONE	NONE
Chr1:27710250-27710549	hyper	12	0	75	0.1168	0.3861	3.304	NONE	NONE	NONE	NONE	NONE	NONE	AT1G73680-AT1G73690
Chr1:27710750-27710949	hyper	8	0	69	0.0027	0.2548	93.7692	NONE	NONE	NONE	NONE	NONE	NONE	AT1G73680-AT1G73690
Chr1:27930250-27930549	hyper	8	0	88	0.023	0.1039	4.5171	AT1G74280	+	protein_coding_gene	Symbols: | alpha/beta-Hydrolases superfamily protein | chr1:27929758-27931126 FORWARD LENGTH=372	NONE	NONE	NONE
Chr1:27932350-27932649	hyper	12	0	109	0.0685	0.1538	2.2437	AT1G74290	+	protein_coding_gene	Symbols: | alpha/beta-Hydrolases superfamily protein | chr1:27931836-27934268 FORWARD LENGTH=371	AT1TE91400	DNA/HAT	NONE
Chr1:27933350-27933849	hyper	48	0	178	0.019	0.2362	12.4461	AT1G74290	+	protein_coding_gene	Symbols: | alpha/beta-Hydrolases superfamily protein | chr1:27931836-27934268 FORWARD LENGTH=371	AT1TE91400	DNA/HAT	NONE
Chr1:27935950-27936249	hyper	8	0	128	0.0085	0.0434	5.1213	AT1G74300	+	protein_coding_gene	Symbols: | alpha/beta-Hydrolases superfamily protein | chr1:27935368-27936474 FORWARD LENGTH=346	NONE	NONE	NONE
Chr1:27952000-27952349	hyper	11	0	91	0.0089	0.1349	15.1648	NONE	NONE	NONE	NONE	NONE	NONE	AT1G74350-AT1G74360
Chr1:27972900-27973149	hyper	14	0	94	0.152	0.3562	2.343	NONE	NONE	NONE	NONE	NONE	NONE	AT1G74420-AT1G74430
Chr1:27989000-27989249	hyper	7	0	69	0.0011	0.1071	99.9643	AT1G74460	-	protein_coding_gene	Symbols: | GDSL-like Lipase/Acylhydrolase superfamily protein | chr1:27988150-27989765 REVERSE LENGTH=366	NONE	NONE	NONE
Chr1:28002300-28002549	hyper	8	0	34	0.0011	0.1284	120.3	NONE	NONE	NONE	NONE	NONE	NONE	AT1G74500-AT1G74510
Chr1:2800700-2800899	hyper	8	0	50	0.0222	0.4979	22.4059	NONE	NONE	NONE	NONE	AT1TE09080	DNA/MuDR	NONE
Chr1:2806100-2806299	hyper	8	0	91	0.0084	0.087	10.39	AT1G08760	+	protein_coding_gene	Symbols: | Plant protein of unknown function (DUF936) | chr1:2805478-2808409 FORWARD LENGTH=748	NONE	NONE	NONE
Chr1:28076950-28077849	hyper	48	1	351	0.0198	0.1412	7.148	AT1G74720	+	protein_coding_gene	Symbols: QKY | C2 calcium/lipid-binding plant phosphoribosyltransferase family protein | chr1:28075173-28078418 FORWARD LENGTH=1081	NONE	NONE	NONE
Chr1:28078050-28078249	hyper	8	0	98	0.0039	0.0438	11.2087	AT1G74720	+	protein_coding_gene	Symbols: QKY | C2 calcium/lipid-binding plant phosphoribosyltransferase family protein | chr1:28075173-28078418 FORWARD LENGTH=1081	NONE	NONE	NONE
Chr1:28080700-28080999	hyper	7	0	101	0.0208	0.0653	3.1382	AT1G74740	-	protein_coding_gene	Symbols: CPK30, CDPK1A, ATCPK30 | calcium-dependent protein kinase 30 | chr1:28080199-28082476 REVERSE LENGTH=541	NONE	NONE	NONE
Chr1:28293450-28293749	hyper	12	0	67	0.0651	0.308	4.7324	NONE	NONE	NONE	NONE	NONE	NONE	AT1G75390-AT1G75400
Chr1:28331700-28331999	hyper	14	0	47	0.0689	0.3788	5.5009	NONE	NONE	NONE	NONE	NONE	NONE	AT1G75470-AT1G75490
Chr1:28399650-28400049	hyper	15	0	84	0.0063	0.3013	47.8285	NONE	NONE	NONE	NONE	NONE	NONE	AT1G75620-AT1G75630
Chr1:28448900-28449249	hyper	12	0	85	0.0019	0.2822	147.011	NONE	NONE	NONE	NONE	NONE	NONE	AT1G75760-AT1G75770
Chr1:28470000-28470299	hyper	16	0	118	0.0787	0.2352	2.9894	NONE	NONE	NONE	NONE	NONE	NONE	AT1G75820-AT1G75830
Chr1:28606950-28607249	hyper	7	0	144	0.0034	0.0397	11.5756	AT1G76250	-	protein_coding_gene	Symbols: | unknown protein; INVOLVED IN: biological_process unknown; LOCATED IN: endomembrane system; EXPRESSED IN: 6 plant structures; EXPRESSED DURING: 4 anthesis, petal differentiation and expansion stage; Has 74 Blast hits to 74 proteins in 16 species: Archae - 0; Bacteria - 0; Metazoa - 1; Fungi - 0; Plants - 69; Viruses - 0; Other Eukaryotes - 4 (source: NCBI BLink). | chr1:28606561-2860894…	NONE	NONE	NONE
Chr1:28607500-28607999	hyper	19	0	93	0.0015	0.1817	120.943	AT1G76250	-	protein_coding_gene	Symbols: | unknown protein; INVOLVED IN: biological_process unknown; LOCATED IN: endomembrane system; EXPRESSED IN: 6 plant structures; EXPRESSED DURING: 4 anthesis, petal differentiation and expansion stage; Has 74 Blast hits to 74 proteins in 16 species: Archae - 0; Bacteria - 0; Metazoa - 1; Fungi - 0; Plants - 69; Viruses - 0; Other Eukaryotes - 4 (source: NCBI BLink). | chr1:28606561-2860894…	NONE	NONE	NONE
Chr1:28635950-28636299	hyper	9	0	140	0.023	0.0644	2.8011	AT1G76340	-	protein_coding_gene	Symbols: GONST3 | golgi nucleotide sugar transporter 3 | chr1:28635188-28636306 REVERSE LENGTH=372	NONE	NONE	NONE
Chr1:28707250-28707549	hyper	10	0	83	0.0793	0.2383	3.0052	NONE	NONE	NONE	NONE	NONE	NONE	AT1G76500-AT1G76510
Chr1:28731550-28731899	hyper	15	1	67	0.1608	0.4088	2.5426	NONE	NONE	NONE	NONE	NONE	NONE	AT1G76570-AT1G76580
Chr1:2877550-2877949	hyper	17	0	95	0.0236	0.2296	9.7097	AT1G08940	+	protein_coding_gene	Symbols: | Phosphoglycerate mutase family protein | chr1:2877694-2879104 FORWARD LENGTH=281	NONE	NONE	NONE
Chr1:28892900-28893299	hyper	17	0	134	0.0128	0.1214	9.4858	AT1G76920	+	protein_coding_gene	Symbols: | F-box family protein | chr1:28892295-28893419 FORWARD LENGTH=374	NONE	NONE	NONE
Chr1:28964450-28964949	hyper	22	0	209	0.075	0.2062	2.7477	NONE	NONE	NONE	NONE	AT1TE94730	LTR/Copia	NONE
Chr1:28965800-28966199	hyper	14	0	143	0.015	0.1358	9.0499	AT1G77100	-	protein_coding_gene	Symbols: | Peroxidase superfamily protein | chr1:28965772-28967066 REVERSE LENGTH=336	NONE	NONE	NONE
Chr1:29007900-29008499	hyper	35	0	220	0.0027	0.2024	74.1389	NONE	NONE	NONE	NONE	NONE	NONE	AT1G77200-AT1G77210
Chr1:29069750-29070049	hyper	9	0	36	0.0142	0.1052	7.3932	AT1G77340	-	protein_coding_gene	Symbols: | Pentatricopeptide repeat (PPR) superfamily protein | chr1:29068620-29069828 REVERSE LENGTH=402	NONE	NONE	NONE
Chr1:29145700-29146199	hyper	18	0	227	0.0235	0.0904	3.8524	AT1G77580	-	protein_coding_gene	Symbols: | Plant protein of unknown function (DUF869) | chr1:29144632-29146600 REVERSE LENGTH=629	NONE	NONE	NONE
Chr1:29236550-29236899	hyper	10	0	169	0.0117	0.043	3.6857	AT1G77760	-	protein_coding_gene	Symbols: NIA1, GNR1, NR1 | nitrate reductase 1 | chr1:29236005-29239367 REVERSE LENGTH=917	NONE	NONE	NONE
Chr1:292500-292699	hyper	9	0	78	0.1198	0.2727	2.2768	NONE	NONE	NONE	NONE	NONE	NONE	AT1G01790-AT1G01800
Chr1:29250000-29250699	hyper	35	0	175	0.0373	0.4257	11.4076	AT1G77790	-	protein_coding_gene	Symbols: | Glycosyl hydrolase superfamily protein | chr1:29250692-29251976 REVERSE LENGTH=346	NONE	NONE	NONE
Chr1:2925050-2925299	hyper	7	0	82	0.0313	0.1143	3.6495	AT1G09060	-	protein_coding_gene	Symbols: | Zinc finger, RING-type;Transcription factor jumonji/aspartyl beta-hydroxylase | chr1:2921235-2925212 REVERSE LENGTH=930	NONE	NONE	NONE
Chr1:29263900-29264299	hyper	23	0	128	0.0608	0.2576	4.2337	NONE	NONE	NONE	NONE	AT1TE95740	LINE/L1	NONE
Chr1:2929750-2930049	hyper	7	0	121	0.002	0.0572	29.1003	AT1G09080	-	protein_coding_gene	Symbols: BIP3 | Heat shock protein 70 (Hsp 70) family protein | chr1:2929268-2931804 REVERSE LENGTH=675	NONE	NONE	NONE
Chr1:29312250-29312649	hyper	16	0	103	0.0118	0.2254	19.0853	AT1G77960	-	protein_coding_gene	Symbols: | unknown protein; BEST Arabidopsis thaliana protein match is: unknown protein (TAIR:AT1G28630.4); Has 13187 Blast hits to 6837 proteins in 407 species: Archae - 0; Bacteria - 447; Metazoa - 4509; Fungi - 1333; Plants - 399; Viruses - 45; Other Eukaryotes - 6454 (source: NCBI BLink). | chr1:29310465-29312973 REVERSE LENGTH=420	NONE	NONE	NONE
Chr1:29316650-29316899	hyper	8	0	58	0.0497	0.1895	3.8156	AT1G77980	-	protein_coding_gene	Symbols: AGL66 | AGAMOUS-like 66 | chr1:29315212-29317067 REVERSE LENGTH=332	NONE	NONE	NONE
Chr1:29320700-29320999	hyper	8	0	119	0.0022	0.0806	36.181	AT1G77990	-	protein_coding_gene	Symbols: AST56, SULTR2;2 | STAS domain / Sulfate transporter family | chr1:29317965-29323249 REVERSE LENGTH=677	AT1TE95915|AT1TE95920|AT1TE95925	RC/Helitron;RC/Helitron;RC/Helitron	NONE
Chr1:29325550-29325899	hyper	11	0	112	0.0031	0.2026	65.1174	NONE	NONE	NONE	NONE	NONE	NONE	AT1G77990-AT1G78000
Chr1:29337000-29337399	hyper	24	0	119	0.0224	0.3028	13.5442	NONE	NONE	NONE	NONE	NONE	NONE	AT1G78010-AT1G78020
Chr1:29380700-29380999	hyper	14	1	78	0.198	0.3788	1.9129	NONE	NONE	NONE	NONE	NONE	NONE	AT1G78090-AT1G78100
Chr1:29496150-29496449	hyper	9	0	78	0.0183	0.1833	9.9969	NONE	NONE	NONE	NONE	NONE	NONE	AT1G78390-AT1G78400
Chr1:29522800-29522999	hyper	7	0	28	0.005	0.1171	23.2267	AT1G78470	+	protein_coding_gene	Symbols: | BEST Arabidopsis thaliana protein match is: F-box family protein (TAIR:AT1G67390.1); Has 40 Blast hits to 40 proteins in 4 species: Archae - 0; Bacteria - 0; Metazoa - 0; Fungi - 0; Plants - 40; Viruses - 0; Other Eukaryotes - 0 (source: NCBI BLink). | chr1:29521770-29522996 FORWARD LENGTH=342	NONE	NONE	NONE
Chr1:29526950-29527149	hyper	7	0	61	0.1105	0.3063	2.7713	NONE	NONE	NONE	NONE	AT1TE96575	RC/Helitron	NONE
Chr1:29590350-29590699	hyper	18	0	105	0.0693	0.342	4.9352	NONE	NONE	NONE	NONE	NONE	NONE	AT1G78660-AT1G78670
Chr1:29612400-29612699	hyper	15	0	122	0.031	0.1982	6.3844	NONE	NONE	NONE	NONE	AT1TE96860	DNA/HAT	NONE
Chr1:29775150-29775399	hyper	11	0	84	0.065	0.182	2.8018	AT1G79150	-	protein_coding_gene	Symbols: | binding | chr1:29772716-29777874 REVERSE LENGTH=830	AT1TE97395	DNA/En-Spm	NONE
Chr1:29793600-29793899	hyper	13	0	138	0.0782	0.1836	2.3462	AT1G79190	+	protein_coding_gene	Symbols: | ARM repeat superfamily protein | chr1:29788639-29794116 FORWARD LENGTH=1335	NONE	NONE	NONE
Chr1:29843850-29844049	hyper	7	0	59	0.0074	0.0976	13.1835	AT1G79340	+	protein_coding_gene	Symbols: AtMC4, MC4 | metacaspase 4 | chr1:29842849-29844368 FORWARD LENGTH=418	NONE	NONE	NONE
Chr1:29865400-29865749	hyper	7	0	144	0.0114	0.0529	4.6326	AT1G79400	+	protein_coding_gene	Symbols: ATCHX2, CHX2 | cation/H+ exchanger 2 | chr1:29864992-29867840 FORWARD LENGTH=783	NONE	NONE	NONE
Chr1:2986800-2987349	hyper	30	0	148	0.0356	0.2737	7.689	AT1G09245	-	protein_coding_gene	Symbols: | Plant self-incompatibility protein S1 family | chr1:2986948-2987367 REVERSE LENGTH=139	AT1TE09700|AT1TE09705	RC/Helitron;DNA/MuDR	NONE
Chr1:29902700-29902899	hyper	10	0	91	0.0542	0.1366	2.5224	AT1G79490	+	protein_coding_gene	Symbols: EMB2217 | Pentatricopeptide repeat (PPR) superfamily protein | chr1:29900617-29903127 FORWARD LENGTH=836	NONE	NONE	NONE
Chr1:30079800-30080349	hyper	29	1	267	0.0853	0.197	2.3091	AT1G79960	-	protein_coding_gene	Symbols: ATOFP14, OFP14 | ovate family protein 14 | chr1:30079665-30080549 REVERSE LENGTH=294	NONE	NONE	NONE
Chr1:30193550-30193799	hyper	10	0	119	0.051	0.1238	2.4253	AT1G80300	+	protein_coding_gene	Symbols: NTT1, ATNTT1 | nucleotide transporter 1 | chr1:30191954-30194280 FORWARD LENGTH=624	NONE	NONE	NONE
Chr1:30318250-30318599	hyper	10	0	147	0.0404	0.0871	2.1535	AT1G80660	-	protein_coding_gene	Symbols: AHA9, HA9 | H(+)-ATPase 9 | chr1:30316227-30319948 REVERSE LENGTH=954	NONE	NONE	NONE
Chr1:3072900-3073349	hyper	16	0	113	0.0646	0.3111	4.8136	NONE	NONE	NONE	NONE	AT1TE09970|AT1TE09975	RC/Helitron;DNA/HAT	NONE
Chr1:3132050-3132349	hyper	10	0	58	0.0048	0.2524	52.6233	NONE	NONE	NONE	NONE	NONE	NONE	AT1G09660-AT1G09665
Chr1:3237450-3238099	hyper	29	1	264	0.0287	0.1226	4.2689	AT1G09940	-	protein_coding_gene	Symbols: HEMA2 | Glutamyl-tRNA reductase family protein | chr1:3237224-3239262 REVERSE LENGTH=530	NONE	NONE	NONE
Chr1:3280700-3280899	hyper	8	0	83	0.0398	0.1201	3.0175	AT1G10050	+	protein_coding_gene	Symbols: | glycosyl hydrolase family 10 protein / carbohydrate-binding domain-containing protein | chr1:3279270-3283444 FORWARD LENGTH=1063	NONE	NONE	NONE
Chr1:3282400-3283249	hyper	51	1	353	0.0182	0.1239	6.8019	AT1G10050	+	protein_coding_gene	Symbols: | glycosyl hydrolase family 10 protein / carbohydrate-binding domain-containing protein | chr1:3279270-3283444 FORWARD LENGTH=1063	NONE	NONE	NONE
Chr1:3360050-3360799	hyper	41	0	269	0.0515	0.2272	4.4083	AT1G10250	-	protein_coding_gene	Symbols: | BEST Arabidopsis thaliana protein match is: SIN3-like 6 (TAIR:AT1G10450.1); Has 310 Blast hits to 310 proteins in 86 species: Archae - 0; Bacteria - 0; Metazoa - 174; Fungi - 23; Plants - 97; Viruses - 0; Other Eukaryotes - 16 (source: NCBI BLink). | chr1:3360137-3360462 REVERSE LENGTH=77	AT1TE10930|AT1TE10935	LTR/Copia;LTR/Copia	NONE
Chr1:3362150-3362449	hyper	12	0	76	0.0912	0.3515	3.854	NONE	NONE	NONE	NONE	NONE	NONE	AT1G10250-AT1G10270
Chr1:3413300-3413649	hyper	13	0	79	0.0628	0.3155	5.0201	NONE	NONE	NONE	NONE	AT1TE11105|AT1TE11110	RC/Helitron;RC/Helitron	NONE
Chr1:3428250-3428499	hyper	9	0	54	0.0403	0.1865	4.6226	AT1G10430	-	protein_coding_gene	Symbols: PP2A-2 | protein phosphatase 2A-2 | chr1:3428705-3430437 REVERSE LENGTH=306	NONE	NONE	NONE
Chr1:3572850-3573299	hyper	23	0	105	0.0692	0.2854	4.1239	AT1G10745	+	protein_coding_gene	Symbols: | Maternally expressed gene (MEG) family protein | chr1:3572710-3573066 FORWARD LENGTH=82	AT1TE11630	RC/Helitron	NONE
Chr1:3683500-3683699	hyper	10	0	97	0.0784	0.1811	2.3097	AT1G11050	+	protein_coding_gene	Symbols: | Protein kinase superfamily protein | chr1:3681892-3683769 FORWARD LENGTH=625	NONE	NONE	NONE
Chr1:372200-372499	hyper	12	0	101	0.138	0.3178	2.3024	AT1G02074	+	protein_coding_gene	Symbols: | unknown protein; Has 30201 Blast hits to 17322 proteins in 780 species: Archae - 12; Bacteria - 1396; Metazoa - 17338; Fungi - 3422; Plants - 5037; Viruses - 0; Other Eukaryotes - 2996 (source: NCBI BLink). | chr1:372064-372210 FORWARD LENGTH=48	NONE	NONE	NONE
Chr1:372900-373249	hyper	13	0	67	0.0128	0.2586	20.1437	NONE	NONE	NONE	NONE	NONE	NONE	AT1G02074-AT1G02080
Chr1:3730500-3730849	hyper	13	0	152	0.0054	0.0475	8.7971	NONE	NONE	NONE	NONE	NONE	NONE	AT1G11145-AT1G11160
Chr1:3797750-3798049	hyper	8	0	130	0.0204	0.0461	2.2575	AT1G11300	+	protein_coding_gene	Symbols: | protein serine/threonine kinases;protein kinases;ATP binding;sugar binding;kinases;carbohydrate binding | chr1:3794389-3800719 FORWARD LENGTH=1650	NONE	NONE	NONE
Chr1:3894400-3894649	hyper	11	0	80	0.1385	0.3043	2.1982	AT1G11590	+	protein_coding_gene	Symbols: | Plant invertase/pectin methylesterase inhibitor superfamily | chr1:3892634-3894620 FORWARD LENGTH=524	NONE	NONE	NONE
Chr1:3933450-3933699	hyper	7	0	55	0.0826	0.2754	3.3319	NONE	NONE	NONE	NONE	NONE	NONE	AT1G11670-AT1G11680
Chr1:3940300-3940499	hyper	7	0	96	0.0487	0.1294	2.6598	AT1G11680	+	protein_coding_gene	Symbols: CYP51G1, EMB1738, CYP51A2, CYP51 | CYTOCHROME P450 51G1 | chr1:3938925-3940585 FORWARD LENGTH=488	NONE	NONE	NONE
Chr1:3987950-3988499	hyper	24	0	153	0.0144	0.1743	12.0817	NONE	NONE	NONE	NONE	NONE	NONE	AT1G11800-AT1G11810
Chr1:4053450-4053749	hyper	8	0	131	0.0017	0.0345	20.6633	AT1G12000	-	protein_coding_gene	Symbols: | Phosphofructokinase family protein | chr1:4050159-4053727 REVERSE LENGTH=566	NONE	NONE	NONE
Chr1:4061100-4061299	hyper	7	0	39	0.0122	0.1767	14.53	NONE	NONE	NONE	NONE	NONE	NONE	AT1G12010-AT1G12020
Chr1:4061700-4062099	hyper	23	0	144	0.1269	0.3567	2.8109	NONE	NONE	NONE	NONE	NONE	NONE	AT1G12010-AT1G12020
Chr1:4113000-4113349	hyper	18	0	87	0.1125	0.2888	2.5665	NONE	NONE	NONE	NONE	AT1TE13375|AT1TE13380	DNA/MuDR;DNA/MuDR	NONE
Chr1:4138000-4138249	hyper	7	0	47	0.0056	0.0828	14.6663	AT1G12200	+	protein_coding_gene	Symbols: | Flavin-binding monooxygenase family protein | chr1:4137627-4139835 FORWARD LENGTH=465	NONE	NONE	NONE
Chr1:4156500-4156999	hyper	22	0	207	0.0691	0.1406	2.0355	AT1G12240	+	protein_coding_gene	Symbols: ATBETAFRUCT4, VAC-INV | Glycosyl hydrolases family 32 protein | chr1:4153699-4157457 FORWARD LENGTH=664	NONE	NONE	NONE
Chr1:42100-42449	hyper	13	0	82	0.0441	0.3041	6.8998	NONE	NONE	NONE	NONE	NONE	NONE	AT1G01070-AT1G01073
Chr1:4292850-4293299	hyper	15	0	90	0.1064	0.3142	2.952	NONE	NONE	NONE	NONE	AT1TE13960	RC/Helitron	NONE
Chr1:4294050-4294349	hyper	9	0	102	0.0411	0.1551	3.775	NONE	NONE	NONE	NONE	AT1TE13965|AT1TE13970	RC/Helitron;RC/Helitron	NONE
Chr1:432200-432399	hyper	7	0	32	0.1493	0.4269	2.8599	NONE	NONE	NONE	NONE	NONE	NONE	AT1G02220-AT1G02230
Chr1:4326350-4326549	hyper	7	0	58	0.2266	0.564	2.4888	NONE	NONE	NONE	NONE	NONE	NONE	AT1G12700-AT1G12710
Chr1:432650-432999	hyper	18	0	70	0.0628	0.3879	6.1779	NONE	NONE	NONE	NONE	AT1TE01405	LINE/L1	NONE
Chr1:434450-434799	hyper	10	0	62	0.001	0.1759	168.029	NONE	NONE	NONE	NONE	NONE	NONE	AT1G02220-AT1G02230
Chr1:4411100-4411649	hyper	28	0	163	0.0776	0.2587	3.3361	NONE	NONE	NONE	NONE	AT1TE14315|AT1TE14320	LTR/Copia;LTR/Copia	NONE
Chr1:4411900-4412349	hyper	20	0	112	0.0038	0.2283	59.8678	NONE	NONE	NONE	NONE	NONE	NONE	AT1G12930-AT1G12938
Chr1:447000-447449	hyper	21	0	117	0.0596	0.2796	4.6916	NONE	NONE	NONE	NONE	NONE	NONE	AT1G02270-AT1G02280
Chr1:4474700-4475049	hyper	13	0	116	0.0349	0.1596	4.5724	AT1G13130	+	protein_coding_gene	Symbols: | Cellulase (glycosyl hydrolase family 5) protein | chr1:4474726-4477820 FORWARD LENGTH=552	NONE	NONE	NONE
Chr1:450-649	hyper	7	0	72	0.0931	0.2176	2.3367	NONE	NONE	NONE	NONE	NONE	NONE	#NAME?
Chr1:4505800-4506049	hyper	8	0	33	0.0052	0.2207	42.0904	NONE	NONE	NONE	NONE	NONE	NONE	AT1G13195-AT1G13200
Chr1:4506600-4506949	hyper	12	0	65	0.0369	0.2291	6.2068	NONE	NONE	NONE	NONE	AT1TE14645	RC/Helitron	NONE
Chr1:4509150-4509499	hyper	8	0	128	0.0621	0.1223	1.969	AT1G13210	-	protein_coding_gene	Symbols: ACA.l | autoinhibited Ca2+/ATPase II | chr1:4509252-4513774 REVERSE LENGTH=1203	NONE	NONE	NONE
Chr1:4509650-4509899	hyper	7	0	100	0.0745	0.1564	2.1004	AT1G13210	-	protein_coding_gene	Symbols: ACA.l | autoinhibited Ca2+/ATPase II | chr1:4509252-4513774 REVERSE LENGTH=1203	NONE	NONE	NONE
Chr1:4595650-4595849	hyper	7	0	26	0.0069	0.2854	41.1012	NONE	NONE	NONE	NONE	AT1TE14910	RC/Helitron	NONE
Chr1:4620050-4620399	hyper	12	0	38	0.0057	0.2053	36.0615	AT1G13470	-	protein_coding_gene	Symbols: | Protein of unknown function (DUF1262) | chr1:4620322-4621542 REVERSE LENGTH=379	AT1TE14990	RC/Helitron	NONE
Chr1:4621500-4621699	hyper	9	0	56	0.1915	0.3926	2.0501	AT1G13470	-	protein_coding_gene	Symbols: | Protein of unknown function (DUF1262) | chr1:4620322-4621542 REVERSE LENGTH=379	NONE	NONE	NONE
Chr1:4827650-4827949	hyper	8	0	40	0	0.36	36	NONE	NONE	NONE	NONE	NONE	NONE	AT1G14080-AT1G14100
Chr1:4856050-4856349	hyper	8	0	101	0.0238	0.0951	3.9974	AT1G14205	+	protein_coding_gene	Symbols: | Ribosomal L18p/L5e family protein | chr1:4855582-4856762 FORWARD LENGTH=165	NONE	NONE	NONE
Chr1:4856950-4857299	hyper	7	0	96	0.0381	0.1213	3.1865	AT1G14210	-	protein_coding_gene	Symbols: | Ribonuclease T2 family protein | chr1:4856902-4857941 REVERSE LENGTH=247	NONE	NONE	NONE
Chr1:4860500-4860749	hyper	11	0	73	0.154	0.3456	2.2443	AT1G14225	-	protein_coding_gene	Symbols: | unknown protein; Has 30201 Blast hits to 17322 proteins in 780 species: Archae - 12; Bacteria - 1396; Metazoa - 17338; Fungi - 3422; Plants - 5037; Viruses - 0; Other Eukaryotes - 2996 (source: NCBI BLink). | chr1:4860515-4860649 REVERSE LENGTH=44	NONE	NONE	NONE
Chr1:4898000-4898349	hyper	14	0	129	0.0332	0.1081	3.2534	AT1G14340	+	protein_coding_gene	Symbols: | RNA-binding (RRM/RBD/RNP motifs) family protein | chr1:4897709-4898776 FORWARD LENGTH=244	NONE	NONE	NONE
Chr1:4966050-4966499	hyper	16	0	136	0.0782	0.1956	2.5014	NONE	NONE	NONE	NONE	NONE	NONE	AT1G14510-AT1G14520
Chr1:4967400-4967649	hyper	8	0	48	0.1133	0.2783	2.4555	NONE	NONE	NONE	NONE	NONE	NONE	AT1G14510-AT1G14520
Chr1:4980050-4980399	hyper	7	0	112	0	0.0391	3.9135	AT1G14550	+	protein_coding_gene	Symbols: | Peroxidase superfamily protein | chr1:4979028-4980324 FORWARD LENGTH=321	NONE	NONE	NONE
Chr1:5056300-5056649	hyper	15	0	115	0.0546	0.2344	4.2925	NONE	NONE	NONE	NONE	NONE	NONE	AT1G14690-AT1G14700
Chr1:5091700-5092099	hyper	27	0	94	0.0017	0.3096	185.453	AT1G14780	+	protein_coding_gene	Symbols: | MAC/Perforin domain-containing protein | chr1:5091020-5093873 FORWARD LENGTH=627	NONE	NONE	NONE
Chr1:512450-512699	hyper	10	0	66	0.0541	0.1581	2.9239	AT1G02470	-	protein_coding_gene	Symbols: | Polyketide cyclase/dehydrase and lipid transport superfamily protein | chr1:511916-513573 REVERSE LENGTH=220	AT1TE01660|AT1TE01665	DNA/MuDR;DNA/MuDR	NONE
Chr1:5310500-5310849	hyper	10	0	137	0.0417	0.116	2.7824	AT1G15460	-	protein_coding_gene	Symbols: ATBOR4, BOR4 | HCO3- transporter family | chr1:5310196-5313376 REVERSE LENGTH=683	NONE	NONE	NONE
Chr1:5335900-5336199	hyper	10	2	132	0.014	0.0622	4.4362	AT1G15520	-	protein_coding_gene	Symbols: PDR12, ATPDR12, ABCG40, ATABCG40 | pleiotropic drug resistance 12 | chr1:5331993-5338175 REVERSE LENGTH=1423	NONE	NONE	NONE
Chr1:5342600-5342949	hyper	8	0	156	0.0098	0.0546	5.5747	AT1G15540	+	protein_coding_gene	Symbols: | 2-oxoglutarate (2OG) and Fe(II)-dependent oxygenase superfamily protein | chr1:5342587-5343705 FORWARD LENGTH=320	NONE	NONE	NONE
[truncated: 3,446 more rows]
